# Supplementary material for: Verification of the dual cycle mechanism for methanol-to-olefin conversion in HSAPO-34: a methylbenzene-based cycle from DFT calculations
Source: Royal Society of Chemistry journal article supplement (doi:10.1039/c4cy00262h), 2014-01-01
Supplement: c4cy00262h1.pdf [file c4cy00262h1.pdf]

# **Verification of dual cycle mechanism for methanol-to-olefins conversion in HSAPO-34: Methylbenzenes-based cycle from DFT calculations**

Chuan-Ming Wang,\* Yang-Dong Wang, Zai-Ku Xie\*

Shanghai Research Institute of Petrochemical Technology, SINOPEC, Shanghai 201208, China

\*Tel. : (+86)21-68462197; Fax: (+86)21-68462283

E-Mail: [wangcm.sshy@sinopec.com](mailto:wangcm.sshy@sinopec.com), and [xzk@sinopec.com](mailto:xzk@sinopec.com)

## **Supplementary Information:**

The optimized geometries of the transition state structures in HMB-based, TMB-based, and PX-based side chain hydrocarbon pool mechanism are listed below in cif format.

TS1-2 in HMB-based pathway

data\_image0

\_cell\_length\_a 13.8042  
\_cell\_length\_b 13.8042  
\_cell\_length\_c 15.044  
\_cell\_angle\_alpha 90  
\_cell\_angle\_beta 90  
\_cell\_angle\_gamma 120

\_symmetry\_space\_group\_name\_H-M P 1

\_symmetry\_int\_tables\_number 1

loop\_

\_symmetry\_equiv\_pos\_as\_xyz  
'x, y, z'

loop\_

\_atom\_site\_label  
\_atom\_site\_occupancy  
\_atom\_site\_fract\_x  
\_atom\_site\_fract\_y  
\_atom\_site\_fract\_z  
\_atom\_site\_thermal\_displace\_type  
\_atom\_site\_B\_iso\_or\_equiv  
\_atom\_site\_type\_symbol

|     |        |         |         |         |      |       |    |
|-----|--------|---------|---------|---------|------|-------|----|
| P1  | 1.0000 | 0.05490 | 0.17974 | 0.52972 | Biso | 1.000 | P  |
| O1  | 1.0000 | 0.09057 | 0.30376 | 0.51445 | Biso | 1.000 | O  |
| O2  | 1.0000 | 0.28855 | 0.39638 | 0.82985 | Biso | 1.000 | O  |
| O3  | 1.0000 | 0.14863 | 0.49178 | 0.79573 | Biso | 1.000 | O  |
| Al1 | 1.0000 | 0.26889 | 0.28226 | 0.07246 | Biso | 1.000 | Al |
| O4  | 1.0000 | 0.17120 | 0.11933 | 0.28440 | Biso | 1.000 | O  |
| Al2 | 1.0000 | 0.05003 | 0.17694 | 0.73542 | Biso | 1.000 | Al |
| P2  | 1.0000 | 0.15723 | 0.06880 | 0.19012 | Biso | 1.000 | P  |
| Al3 | 1.0000 | 0.15819 | 0.06970 | 0.39594 | Biso | 1.000 | Al |
| O5  | 1.0000 | 0.08903 | 0.16554 | 0.62556 | Biso | 1.000 | O  |
| P3  | 1.0000 | 0.26201 | 0.27670 | 0.85575 | Biso | 1.000 | P  |
| O6  | 1.0000 | 0.35880 | 0.25996 | 0.82314 | Biso | 1.000 | O  |
| O7  | 1.0000 | 0.24903 | 0.03668 | 0.17293 | Biso | 1.000 | O  |
| O8  | 1.0000 | 0.48783 | 0.19420 | 0.13825 | Biso | 1.000 | O  |
| Al4 | 1.0000 | 0.05432 | 0.40720 | 0.52853 | Biso | 1.000 | Al |
| O9  | 1.0000 | 0.15362 | 0.18886 | 0.80963 | Biso | 1.000 | O  |
| P4  | 1.0000 | 0.25611 | 0.49839 | 0.07163 | Biso | 1.000 | P  |
| Al5 | 1.0000 | 0.38873 | 0.07328 | 0.19420 | Biso | 1.000 | Al |

|      |        |         |         |         |      |       |    |
|------|--------|---------|---------|---------|------|-------|----|
| O10  | 1.0000 | 0.25206 | 0.39330 | 0.11121 | Biso | 1.000 | O  |
| O11  | 1.0000 | 0.02437 | 0.29008 | 0.74460 | Biso | 1.000 | O  |
| O12  | 1.0000 | 0.42101 | 0.10169 | 0.30817 | Biso | 1.000 | O  |
| O13  | 1.0000 | 0.11854 | 0.14904 | 0.46278 | Biso | 1.000 | O  |
| O14  | 1.0000 | 0.07471 | 0.45341 | 0.64023 | Biso | 1.000 | O  |
| P5   | 1.0000 | 0.37804 | 0.06827 | 0.40465 | Biso | 1.000 | P  |
| O15  | 1.0000 | 0.29818 | 0.11108 | 0.43085 | Biso | 1.000 | O  |
| O16  | 1.0000 | 0.40856 | 0.31962 | 0.09884 | Biso | 1.000 | O  |
| P6   | 1.0000 | 0.04835 | 0.41220 | 0.73764 | Biso | 1.000 | P  |
| AI6  | 1.0000 | 0.48510 | 0.27671 | 0.86577 | Biso | 1.000 | AI |
| O17  | 1.0000 | 0.16912 | 0.15768 | 0.12180 | Biso | 1.000 | O  |
| AI7  | 1.0000 | 0.92738 | 0.61189 | 0.40071 | Biso | 1.000 | AI |
| P7   | 1.0000 | 0.71422 | 0.50818 | 0.85309 | Biso | 1.000 | P  |
| AI8  | 1.0000 | 0.58477 | 0.93473 | 0.73371 | Biso | 1.000 | AI |
| O18  | 1.0000 | 0.72621 | 0.62208 | 0.82944 | Biso | 1.000 | O  |
| O19  | 1.0000 | 0.96020 | 0.73110 | 0.16826 | Biso | 1.000 | O  |
| O20  | 1.0000 | 0.81960 | 0.82253 | 0.12366 | Biso | 1.000 | O  |
| O21  | 1.0000 | 0.56468 | 0.89699 | 0.62015 | Biso | 1.000 | O  |
| O22  | 1.0000 | 0.87118 | 0.87986 | 0.47413 | Biso | 1.000 | O  |
| O23  | 1.0000 | 0.88183 | 0.57973 | 0.28846 | Biso | 1.000 | O  |
| P8   | 1.0000 | 0.60208 | 0.94847 | 0.52602 | Biso | 1.000 | P  |
| O24  | 1.0000 | 0.69032 | 0.92268 | 0.48752 | Biso | 1.000 | O  |
| O25  | 1.0000 | 0.57453 | 0.70401 | 0.83233 | Biso | 1.000 | O  |
| O26  | 1.0000 | 0.81086 | 0.84788 | 0.78961 | Biso | 1.000 | O  |
| P9   | 1.0000 | 0.92754 | 0.60961 | 0.19226 | Biso | 1.000 | P  |
| AI9  | 1.0000 | 0.49010 | 0.73513 | 0.06534 | Biso | 1.000 | AI |
| Si1  | 1.0000 | 0.93364 | 0.83858 | 0.40527 | Biso | 1.000 | Si |
| O27  | 1.0000 | 0.91320 | 0.71873 | 0.44683 | Biso | 1.000 | O  |
| O28  | 1.0000 | 0.69873 | 0.61976 | 0.07283 | Biso | 1.000 | O  |
| O29  | 1.0000 | 0.49905 | 0.90033 | 0.46483 | Biso | 1.000 | O  |
| AI10 | 1.0000 | 0.71385 | 0.73870 | 0.85759 | Biso | 1.000 | AI |
| O30  | 1.0000 | 0.81250 | 0.92420 | 0.64043 | Biso | 1.000 | O  |
| O31  | 1.0000 | 0.83653 | 0.52566 | 0.12826 | Biso | 1.000 | O  |
| P10  | 1.0000 | 0.81808 | 0.94996 | 0.74076 | Biso | 1.000 | P  |
| AI11 | 1.0000 | 0.92412 | 0.83468 | 0.19892 | Biso | 1.000 | AI |
| AI12 | 1.0000 | 0.82778 | 0.96081 | 0.52512 | Biso | 1.000 | AI |
| O32  | 1.0000 | 0.87665 | 0.81786 | 0.30676 | Biso | 1.000 | O  |
| O33  | 1.0000 | 0.84005 | 0.49270 | 0.46502 | Biso | 1.000 | O  |
| O34  | 1.0000 | 0.48340 | 0.81923 | 0.79336 | Biso | 1.000 | O  |
| P11  | 1.0000 | 0.72036 | 0.74110 | 0.06641 | Biso | 1.000 | P  |
| O35  | 1.0000 | 0.61389 | 0.74012 | 0.09961 | Biso | 1.000 | O  |
| O36  | 1.0000 | 0.72002 | 0.96784 | 0.76893 | Biso | 1.000 | O  |
| O37  | 1.0000 | 0.81758 | 0.41102 | 0.61702 | Biso | 1.000 | O  |
| O38  | 1.0000 | 0.48031 | 0.11923 | 0.46688 | Biso | 1.000 | O  |

|      |        |         |         |         |      |       |    |
|------|--------|---------|---------|---------|------|-------|----|
| O39  | 1.0000 | 0.65644 | 0.07724 | 0.53323 | Biso | 1.000 | O  |
| P12  | 1.0000 | 0.82151 | 0.38908 | 0.51663 | Biso | 1.000 | P  |
| O40  | 1.0000 | 0.70801 | 0.29041 | 0.48654 | Biso | 1.000 | O  |
| O41  | 1.0000 | 0.58727 | 0.42043 | 0.85718 | Biso | 1.000 | O  |
| O42  | 1.0000 | 0.51824 | 0.19242 | 0.80120 | Biso | 1.000 | O  |
| AI13 | 1.0000 | 0.73185 | 0.51335 | 0.05618 | Biso | 1.000 | AI |
| O43  | 1.0000 | 0.92568 | 0.10758 | 0.51863 | Biso | 1.000 | O  |
| AI14 | 1.0000 | 0.81458 | 0.38943 | 0.73233 | Biso | 1.000 | AI |
| O44  | 1.0000 | 0.91430 | 0.35996 | 0.49692 | Biso | 1.000 | O  |
| P13  | 1.0000 | 0.59167 | 0.16666 | 0.74014 | Biso | 1.000 | P  |
| O45  | 1.0000 | 0.56321 | 0.04597 | 0.75921 | Biso | 1.000 | O  |
| AI15 | 1.0000 | 0.59965 | 0.16633 | 0.53201 | Biso | 1.000 | AI |
| O46  | 1.0000 | 0.92801 | 0.05474 | 0.76710 | Biso | 1.000 | O  |
| O47  | 1.0000 | 0.77161 | 0.47812 | 0.77916 | Biso | 1.000 | O  |
| P14  | 1.0000 | 0.49487 | 0.28338 | 0.07315 | Biso | 1.000 | P  |
| O48  | 1.0000 | 0.61308 | 0.38477 | 0.07994 | Biso | 1.000 | O  |
| O49  | 1.0000 | 0.71789 | 0.24776 | 0.75861 | Biso | 1.000 | O  |
| O50  | 1.0000 | 0.94595 | 0.41828 | 0.77182 | Biso | 1.000 | O  |
| O51  | 1.0000 | 0.56377 | 0.17878 | 0.64253 | Biso | 1.000 | O  |
| O52  | 1.0000 | 0.50542 | 0.78364 | 0.95427 | Biso | 1.000 | O  |
| O53  | 1.0000 | 0.77087 | 0.51382 | 0.94350 | Biso | 1.000 | O  |
| O54  | 1.0000 | 0.74533 | 0.78147 | 0.96855 | Biso | 1.000 | O  |
| P15  | 1.0000 | 0.38768 | 0.84972 | 0.18825 | Biso | 1.000 | P  |
| O55  | 1.0000 | 0.40961 | 0.96466 | 0.15539 | Biso | 1.000 | O  |
| AI16 | 1.0000 | 0.37676 | 0.85362 | 0.40104 | Biso | 1.000 | AI |
| P16  | 1.0000 | 0.48370 | 0.73392 | 0.85917 | Biso | 1.000 | P  |
| O56  | 1.0000 | 0.36870 | 0.62819 | 0.85307 | Biso | 1.000 | O  |
| O57  | 1.0000 | 0.26364 | 0.76120 | 0.16942 | Biso | 1.000 | O  |
| O58  | 1.0000 | 0.04201 | 0.96558 | 0.17554 | Biso | 1.000 | O  |
| O59  | 1.0000 | 0.18281 | 0.52791 | 0.12894 | Biso | 1.000 | O  |
| O60  | 1.0000 | 0.14773 | 0.51976 | 0.46288 | Biso | 1.000 | O  |
| O61  | 1.0000 | 0.03006 | 0.59466 | 0.18069 | Biso | 1.000 | O  |
| O62  | 1.0000 | 0.41348 | 0.85444 | 0.28875 | Biso | 1.000 | O  |
| O63  | 1.0000 | 0.18804 | 0.59292 | 0.30717 | Biso | 1.000 | O  |
| O64  | 1.0000 | 0.31666 | 0.93923 | 0.41416 | Biso | 1.000 | O  |
| P17  | 1.0000 | 0.16653 | 0.61813 | 0.40321 | Biso | 1.000 | P  |
| O65  | 1.0000 | 0.27183 | 0.72275 | 0.43896 | Biso | 1.000 | O  |
| O66  | 1.0000 | 0.37960 | 0.59473 | 0.06977 | Biso | 1.000 | O  |
| AI17 | 1.0000 | 0.25222 | 0.49617 | 0.86526 | Biso | 1.000 | AI |
| O67  | 1.0000 | 0.06827 | 0.92742 | 0.40007 | Biso | 1.000 | O  |
| O68  | 1.0000 | 0.46697 | 0.82032 | 0.13816 | Biso | 1.000 | O  |
| O69  | 1.0000 | 0.06691 | 0.63876 | 0.40564 | Biso | 1.000 | O  |
| AI18 | 1.0000 | 0.16552 | 0.62078 | 0.19684 | Biso | 1.000 | AI |
| O70  | 1.0000 | 0.24758 | 0.26139 | 0.95707 | Biso | 1.000 | O  |

|     |        |         |         |         |      |       |   |
|-----|--------|---------|---------|---------|------|-------|---|
| O71 | 1.0000 | 0.47046 | 0.23365 | 0.97772 | Biso | 1.000 | O |
| O72 | 1.0000 | 0.20652 | 0.47287 | 0.97634 | Biso | 1.000 | O |
| H1  | 1.0000 | 0.86069 | 0.70417 | 0.55866 | Biso | 1.000 | H |
| C1  | 1.0000 | 0.65353 | 0.60272 | 0.58548 | Biso | 1.000 | C |
| O73 | 1.0000 | 0.82533 | 0.69327 | 0.61814 | Biso | 1.000 | O |
| H2  | 1.0000 | 0.63467 | 0.65486 | 0.62691 | Biso | 1.000 | H |
| H3  | 1.0000 | 0.65651 | 0.53369 | 0.61546 | Biso | 1.000 | H |
| H4  | 1.0000 | 0.67628 | 0.62486 | 0.51714 | Biso | 1.000 | H |
| H5  | 1.0000 | 0.84100 | 0.76768 | 0.63543 | Biso | 1.000 | H |
| C2  | 1.0000 | 0.56642 | 0.37323 | 0.36222 | Biso | 1.000 | C |
| C3  | 1.0000 | 0.50010 | 0.42453 | 0.50424 | Biso | 1.000 | C |
| C4  | 1.0000 | 0.49974 | 0.33205 | 0.55585 | Biso | 1.000 | C |
| C5  | 1.0000 | 0.46894 | 0.49464 | 0.55071 | Biso | 1.000 | C |
| C6  | 1.0000 | 0.41261 | 0.45595 | 0.64067 | Biso | 1.000 | C |
| C7  | 1.0000 | 0.46154 | 0.58027 | 0.50349 | Biso | 1.000 | C |
| C8  | 1.0000 | 0.41991 | 0.64596 | 0.55409 | Biso | 1.000 | C |
| C9  | 1.0000 | 0.49506 | 0.60033 | 0.41448 | Biso | 1.000 | C |
| C10 | 1.0000 | 0.48500 | 0.68549 | 0.35928 | Biso | 1.000 | C |
| C11 | 1.0000 | 0.53685 | 0.53725 | 0.37233 | Biso | 1.000 | C |
| C12 | 1.0000 | 0.58432 | 0.56858 | 0.27988 | Biso | 1.000 | C |
| C13 | 1.0000 | 0.53433 | 0.44565 | 0.41519 | Biso | 1.000 | C |
| H6  | 1.0000 | 0.52059 | 0.34890 | 0.29945 | Biso | 1.000 | H |
| H7  | 1.0000 | 0.54825 | 0.29762 | 0.39674 | Biso | 1.000 | H |
| H8  | 1.0000 | 0.65546 | 0.41684 | 0.34588 | Biso | 1.000 | H |
| H9  | 1.0000 | 0.42160 | 0.25319 | 0.54704 | Biso | 1.000 | H |
| H10 | 1.0000 | 0.51031 | 0.34898 | 0.62676 | Biso | 1.000 | H |
| H11 | 1.0000 | 0.56854 | 0.32214 | 0.53348 | Biso | 1.000 | H |
| H12 | 1.0000 | 0.37615 | 0.50508 | 0.66351 | Biso | 1.000 | H |
| H13 | 1.0000 | 0.46885 | 0.45936 | 0.69313 | Biso | 1.000 | H |
| H14 | 1.0000 | 0.34513 | 0.36896 | 0.63636 | Biso | 1.000 | H |
| H15 | 1.0000 | 0.43024 | 0.71786 | 0.51821 | Biso | 1.000 | H |
| H16 | 1.0000 | 0.46427 | 0.67566 | 0.61708 | Biso | 1.000 | H |
| H17 | 1.0000 | 0.33109 | 0.59458 | 0.57000 | Biso | 1.000 | H |
| H18 | 1.0000 | 0.46113 | 0.65607 | 0.29129 | Biso | 1.000 | H |
| H19 | 1.0000 | 0.56286 | 0.76584 | 0.35651 | Biso | 1.000 | H |
| H20 | 1.0000 | 0.41961 | 0.69816 | 0.38578 | Biso | 1.000 | H |
| H21 | 1.0000 | 0.64452 | 0.54143 | 0.26696 | Biso | 1.000 | H |
| H22 | 1.0000 | 0.62663 | 0.65866 | 0.27012 | Biso | 1.000 | H |
| H23 | 1.0000 | 0.51871 | 0.52991 | 0.22917 | Biso | 1.000 | H |

TS2-3 in HMB-based pathway

data\_image0

\_cell\_length\_a 13.8042  
 \_cell\_length\_b 13.8042  
 \_cell\_length\_c 15.044  
 \_cell\_angle\_alpha 90  
 \_cell\_angle\_beta 90  
 \_cell\_angle\_gamma 120

\_symmetry\_space\_group\_name\_H-M P 1

\_symmetry\_int\_tables\_number 1

loop\_

\_symmetry\_equiv\_pos\_as\_xyz  
 'x, y, z'

loop\_

\_atom\_site\_label  
 \_atom\_site\_occupancy  
 \_atom\_site\_fract\_x  
 \_atom\_site\_fract\_y  
 \_atom\_site\_fract\_z  
 \_atom\_site\_thermal\_displace\_type  
 \_atom\_site\_B\_iso\_or\_equiv  
 \_atom\_site\_type\_symbol

|     |        |         |         |         |      |       |    |
|-----|--------|---------|---------|---------|------|-------|----|
| P1  | 1.0000 | 0.04321 | 0.17349 | 0.52108 | Biso | 1.000 | P  |
| O1  | 1.0000 | 0.06456 | 0.28753 | 0.48507 | Biso | 1.000 | O  |
| O2  | 1.0000 | 0.28807 | 0.39271 | 0.82841 | Biso | 1.000 | O  |
| O3  | 1.0000 | 0.14262 | 0.48282 | 0.79130 | Biso | 1.000 | O  |
| Al1 | 1.0000 | 0.25844 | 0.27109 | 0.06558 | Biso | 1.000 | Al |
| O4  | 1.0000 | 0.16229 | 0.10214 | 0.28286 | Biso | 1.000 | O  |
| Al2 | 1.0000 | 0.04979 | 0.17495 | 0.72741 | Biso | 1.000 | Al |
| P2  | 1.0000 | 0.14975 | 0.05995 | 0.18589 | Biso | 1.000 | P  |
| Al3 | 1.0000 | 0.14560 | 0.05348 | 0.39499 | Biso | 1.000 | Al |
| O5  | 1.0000 | 0.09510 | 0.19064 | 0.61571 | Biso | 1.000 | O  |
| P3  | 1.0000 | 0.25979 | 0.27126 | 0.85000 | Biso | 1.000 | P  |
| O6  | 1.0000 | 0.35925 | 0.25707 | 0.82065 | Biso | 1.000 | O  |
| O7  | 1.0000 | 0.24291 | 0.03172 | 0.16285 | Biso | 1.000 | O  |
| O8  | 1.0000 | 0.48098 | 0.18580 | 0.13568 | Biso | 1.000 | O  |
| Al4 | 1.0000 | 0.03591 | 0.39032 | 0.52415 | Biso | 1.000 | Al |
| O9  | 1.0000 | 0.15617 | 0.18563 | 0.79765 | Biso | 1.000 | O  |
| P4  | 1.0000 | 0.25500 | 0.49404 | 0.06627 | Biso | 1.000 | P  |
| Al5 | 1.0000 | 0.37985 | 0.06374 | 0.18962 | Biso | 1.000 | Al |

|      |        |         |         |         |      |       |    |
|------|--------|---------|---------|---------|------|-------|----|
| O10  | 1.0000 | 0.24081 | 0.38269 | 0.10083 | Biso | 1.000 | O  |
| O11  | 1.0000 | 0.01148 | 0.27555 | 0.75817 | Biso | 1.000 | O  |
| O12  | 1.0000 | 0.40304 | 0.08774 | 0.30465 | Biso | 1.000 | O  |
| O13  | 1.0000 | 0.10124 | 0.13138 | 0.45849 | Biso | 1.000 | O  |
| O14  | 1.0000 | 0.06925 | 0.42254 | 0.63745 | Biso | 1.000 | O  |
| P5   | 1.0000 | 0.36519 | 0.05561 | 0.40229 | Biso | 1.000 | P  |
| O15  | 1.0000 | 0.28515 | 0.09715 | 0.43142 | Biso | 1.000 | O  |
| O16  | 1.0000 | 0.39744 | 0.30639 | 0.09219 | Biso | 1.000 | O  |
| P6   | 1.0000 | 0.04077 | 0.39750 | 0.73711 | Biso | 1.000 | P  |
| AI6  | 1.0000 | 0.48623 | 0.27737 | 0.86400 | Biso | 1.000 | AI |
| O17  | 1.0000 | 0.15951 | 0.15281 | 0.12285 | Biso | 1.000 | O  |
| AI7  | 1.0000 | 0.92224 | 0.60690 | 0.39650 | Biso | 1.000 | AI |
| P7   | 1.0000 | 0.71132 | 0.50581 | 0.85603 | Biso | 1.000 | P  |
| AI8  | 1.0000 | 0.59295 | 0.94310 | 0.73692 | Biso | 1.000 | AI |
| O18  | 1.0000 | 0.72889 | 0.62014 | 0.82597 | Biso | 1.000 | O  |
| O19  | 1.0000 | 0.95385 | 0.72204 | 0.15631 | Biso | 1.000 | O  |
| O20  | 1.0000 | 0.81404 | 0.81802 | 0.12365 | Biso | 1.000 | O  |
| O21  | 1.0000 | 0.56707 | 0.91893 | 0.62236 | Biso | 1.000 | O  |
| O22  | 1.0000 | 0.85446 | 0.86793 | 0.46482 | Biso | 1.000 | O  |
| O23  | 1.0000 | 0.88479 | 0.58092 | 0.28318 | Biso | 1.000 | O  |
| P8   | 1.0000 | 0.59645 | 0.95090 | 0.52336 | Biso | 1.000 | P  |
| O24  | 1.0000 | 0.67888 | 0.91472 | 0.48926 | Biso | 1.000 | O  |
| O25  | 1.0000 | 0.57337 | 0.70053 | 0.83347 | Biso | 1.000 | O  |
| O26  | 1.0000 | 0.81102 | 0.84509 | 0.79322 | Biso | 1.000 | O  |
| P9   | 1.0000 | 0.92306 | 0.60233 | 0.18519 | Biso | 1.000 | P  |
| AI9  | 1.0000 | 0.48329 | 0.72697 | 0.06347 | Biso | 1.000 | AI |
| Si1  | 1.0000 | 0.92150 | 0.82500 | 0.40314 | Biso | 1.000 | Si |
| O27  | 1.0000 | 0.89236 | 0.70237 | 0.44764 | Biso | 1.000 | O  |
| O28  | 1.0000 | 0.68914 | 0.61314 | 0.07900 | Biso | 1.000 | O  |
| O29  | 1.0000 | 0.48702 | 0.89207 | 0.46977 | Biso | 1.000 | O  |
| AI10 | 1.0000 | 0.71206 | 0.73330 | 0.85758 | Biso | 1.000 | AI |
| O30  | 1.0000 | 0.79682 | 0.89375 | 0.63630 | Biso | 1.000 | O  |
| O31  | 1.0000 | 0.82624 | 0.51379 | 0.12803 | Biso | 1.000 | O  |
| P10  | 1.0000 | 0.81846 | 0.93907 | 0.73338 | Biso | 1.000 | P  |
| AI11 | 1.0000 | 0.92001 | 0.82488 | 0.19363 | Biso | 1.000 | AI |
| AI12 | 1.0000 | 0.81489 | 0.94650 | 0.52398 | Biso | 1.000 | AI |
| O32  | 1.0000 | 0.87419 | 0.80393 | 0.30182 | Biso | 1.000 | O  |
| O33  | 1.0000 | 0.83706 | 0.47631 | 0.44686 | Biso | 1.000 | O  |
| O34  | 1.0000 | 0.49168 | 0.82310 | 0.79203 | Biso | 1.000 | O  |
| P11  | 1.0000 | 0.71426 | 0.73537 | 0.06779 | Biso | 1.000 | P  |
| O35  | 1.0000 | 0.61057 | 0.74116 | 0.09863 | Biso | 1.000 | O  |
| O36  | 1.0000 | 0.73035 | 0.97178 | 0.76112 | Biso | 1.000 | O  |
| O37  | 1.0000 | 0.82957 | 0.44462 | 0.61214 | Biso | 1.000 | O  |
| O38  | 1.0000 | 0.47104 | 0.11047 | 0.46061 | Biso | 1.000 | O  |

|      |        |         |         |         |      |       |    |
|------|--------|---------|---------|---------|------|-------|----|
| O39  | 1.0000 | 0.65291 | 0.07956 | 0.51327 | Biso | 1.000 | O  |
| P12  | 1.0000 | 0.81259 | 0.38897 | 0.51906 | Biso | 1.000 | P  |
| O40  | 1.0000 | 0.68991 | 0.29620 | 0.50728 | Biso | 1.000 | O  |
| O41  | 1.0000 | 0.58332 | 0.42323 | 0.86377 | Biso | 1.000 | O  |
| O42  | 1.0000 | 0.53356 | 0.20789 | 0.79571 | Biso | 1.000 | O  |
| AI13 | 1.0000 | 0.72244 | 0.50737 | 0.05818 | Biso | 1.000 | AI |
| O43  | 1.0000 | 0.91452 | 0.09207 | 0.52678 | Biso | 1.000 | O  |
| AI14 | 1.0000 | 0.81432 | 0.39452 | 0.72270 | Biso | 1.000 | AI |
| O44  | 1.0000 | 0.89090 | 0.33911 | 0.50920 | Biso | 1.000 | O  |
| P13  | 1.0000 | 0.59073 | 0.16310 | 0.73426 | Biso | 1.000 | P  |
| O45  | 1.0000 | 0.57786 | 0.05506 | 0.77565 | Biso | 1.000 | O  |
| AI15 | 1.0000 | 0.58640 | 0.15874 | 0.53099 | Biso | 1.000 | AI |
| O46  | 1.0000 | 0.93588 | 0.04064 | 0.74340 | Biso | 1.000 | O  |
| O47  | 1.0000 | 0.76388 | 0.46577 | 0.78562 | Biso | 1.000 | O  |
| P14  | 1.0000 | 0.48736 | 0.27397 | 0.06958 | Biso | 1.000 | P  |
| O48  | 1.0000 | 0.60346 | 0.37800 | 0.07888 | Biso | 1.000 | O  |
| O49  | 1.0000 | 0.71726 | 0.24921 | 0.72394 | Biso | 1.000 | O  |
| O50  | 1.0000 | 0.94119 | 0.41281 | 0.76377 | Biso | 1.000 | O  |
| O51  | 1.0000 | 0.53456 | 0.13853 | 0.64139 | Biso | 1.000 | O  |
| O52  | 1.0000 | 0.49299 | 0.77320 | 0.95230 | Biso | 1.000 | O  |
| O53  | 1.0000 | 0.76853 | 0.51592 | 0.94681 | Biso | 1.000 | O  |
| O54  | 1.0000 | 0.74083 | 0.77107 | 0.96921 | Biso | 1.000 | O  |
| P15  | 1.0000 | 0.38006 | 0.84152 | 0.19010 | Biso | 1.000 | P  |
| O55  | 1.0000 | 0.40137 | 0.95467 | 0.15297 | Biso | 1.000 | O  |
| AI16 | 1.0000 | 0.36963 | 0.84407 | 0.40037 | Biso | 1.000 | AI |
| P16  | 1.0000 | 0.48161 | 0.73085 | 0.85529 | Biso | 1.000 | P  |
| O56  | 1.0000 | 0.36658 | 0.62724 | 0.83909 | Biso | 1.000 | O  |
| O57  | 1.0000 | 0.25383 | 0.75430 | 0.18022 | Biso | 1.000 | O  |
| O58  | 1.0000 | 0.03570 | 0.95627 | 0.16927 | Biso | 1.000 | O  |
| O59  | 1.0000 | 0.18755 | 0.52776 | 0.12693 | Biso | 1.000 | O  |
| O60  | 1.0000 | 0.12208 | 0.51375 | 0.46681 | Biso | 1.000 | O  |
| O61  | 1.0000 | 0.02367 | 0.58510 | 0.16937 | Biso | 1.000 | O  |
| O62  | 1.0000 | 0.41500 | 0.85367 | 0.28913 | Biso | 1.000 | O  |
| O63  | 1.0000 | 0.16398 | 0.57234 | 0.30724 | Biso | 1.000 | O  |
| O64  | 1.0000 | 0.30602 | 0.92677 | 0.41330 | Biso | 1.000 | O  |
| P17  | 1.0000 | 0.15385 | 0.61096 | 0.40204 | Biso | 1.000 | P  |
| O65  | 1.0000 | 0.26859 | 0.70807 | 0.43213 | Biso | 1.000 | O  |
| O66  | 1.0000 | 0.38142 | 0.58316 | 0.06811 | Biso | 1.000 | O  |
| AI17 | 1.0000 | 0.25170 | 0.49459 | 0.85834 | Biso | 1.000 | AI |
| O67  | 1.0000 | 0.05668 | 0.91096 | 0.40391 | Biso | 1.000 | O  |
| O68  | 1.0000 | 0.45228 | 0.80538 | 0.13744 | Biso | 1.000 | O  |
| O69  | 1.0000 | 0.06692 | 0.65033 | 0.40385 | Biso | 1.000 | O  |
| AI18 | 1.0000 | 0.15687 | 0.61041 | 0.19606 | Biso | 1.000 | AI |
| O70  | 1.0000 | 0.23629 | 0.24767 | 0.95032 | Biso | 1.000 | O  |



|     |        |         |         |         |      |       |   |
|-----|--------|---------|---------|---------|------|-------|---|
| O71 | 1.0000 | 0.46888 | 0.22565 | 0.97377 | Biso | 1.000 | O |
| O72 | 1.0000 | 0.20867 | 0.47943 | 0.97036 | Biso | 1.000 | O |
| H1  | 1.0000 | 0.81385 | 0.67423 | 0.53699 | Biso | 1.000 | H |
| H2  | 1.0000 | 0.68369 | 0.61410 | 0.60522 | Biso | 1.000 | H |
| O73 | 1.0000 | 0.77909 | 0.67067 | 0.59792 | Biso | 1.000 | O |
| H3  | 1.0000 | 0.79528 | 0.74703 | 0.61118 | Biso | 1.000 | H |
| C1  | 1.0000 | 0.36974 | 0.42665 | 0.32210 | Biso | 1.000 | C |
| H4  | 1.0000 | 0.36672 | 0.35993 | 0.28143 | Biso | 1.000 | H |
| H5  | 1.0000 | 0.30833 | 0.38927 | 0.37550 | Biso | 1.000 | H |
| H6  | 1.0000 | 0.34610 | 0.47564 | 0.27996 | Biso | 1.000 | H |
| C2  | 1.0000 | 0.57491 | 0.55465 | 0.28377 | Biso | 1.000 | C |
| C3  | 1.0000 | 0.51195 | 0.42301 | 0.41582 | Biso | 1.000 | C |
| C4  | 1.0000 | 0.53862 | 0.34726 | 0.36339 | Biso | 1.000 | C |
| C5  | 1.0000 | 0.50607 | 0.42185 | 0.50620 | Biso | 1.000 | C |
| C6  | 1.0000 | 0.49195 | 0.32819 | 0.56570 | Biso | 1.000 | C |
| C7  | 1.0000 | 0.51313 | 0.51753 | 0.55210 | Biso | 1.000 | C |
| C8  | 1.0000 | 0.55936 | 0.54504 | 0.63694 | Biso | 1.000 | C |
| C9  | 1.0000 | 0.48117 | 0.58924 | 0.50553 | Biso | 1.000 | C |
| C10 | 1.0000 | 0.44811 | 0.65647 | 0.56409 | Biso | 1.000 | C |
| C11 | 1.0000 | 0.48315 | 0.59063 | 0.41507 | Biso | 1.000 | C |
| C12 | 1.0000 | 0.47789 | 0.67946 | 0.36234 | Biso | 1.000 | C |
| C13 | 1.0000 | 0.49109 | 0.50257 | 0.36135 | Biso | 1.000 | C |
| H7  | 1.0000 | 0.57637 | 0.49012 | 0.24335 | Biso | 1.000 | H |
| H8  | 1.0000 | 0.65934 | 0.61095 | 0.30836 | Biso | 1.000 | H |
| H9  | 1.0000 | 0.55108 | 0.60196 | 0.24015 | Biso | 1.000 | H |
| H10 | 1.0000 | 0.48363 | 0.30998 | 0.30643 | Biso | 1.000 | H |
| H11 | 1.0000 | 0.53690 | 0.28163 | 0.40297 | Biso | 1.000 | H |
| H12 | 1.0000 | 0.62380 | 0.39617 | 0.33711 | Biso | 1.000 | H |
| H13 | 1.0000 | 0.56837 | 0.34624 | 0.60052 | Biso | 1.000 | H |
| H14 | 1.0000 | 0.45994 | 0.25079 | 0.52922 | Biso | 1.000 | H |
| H15 | 1.0000 | 0.42949 | 0.31397 | 0.61653 | Biso | 1.000 | H |
| H16 | 1.0000 | 0.55332 | 0.60775 | 0.67562 | Biso | 1.000 | H |
| H17 | 1.0000 | 0.56915 | 0.48468 | 0.67586 | Biso | 1.000 | H |
| H18 | 1.0000 | 0.40279 | 0.68952 | 0.52871 | Biso | 1.000 | H |
| H19 | 1.0000 | 0.51937 | 0.72528 | 0.59725 | Biso | 1.000 | H |
| H20 | 1.0000 | 0.39259 | 0.60191 | 0.61649 | Biso | 1.000 | H |
| H21 | 1.0000 | 0.41229 | 0.64582 | 0.31194 | Biso | 1.000 | H |
| H22 | 1.0000 | 0.55726 | 0.73123 | 0.32785 | Biso | 1.000 | H |
| H23 | 1.0000 | 0.46607 | 0.73451 | 0.40573 | Biso | 1.000 | H |

TS3-4 in HMB-based pathway

data\_image0

\_cell\_length\_a 13.8042  
 \_cell\_length\_b 13.8042  
 \_cell\_length\_c 15.044  
 \_cell\_angle\_alpha 90  
 \_cell\_angle\_beta 90  
 \_cell\_angle\_gamma 120

\_symmetry\_space\_group\_name\_H-M P 1

\_symmetry\_int\_tables\_number 1

loop\_

\_symmetry\_equiv\_pos\_as\_xyz  
 'x, y, z'

loop\_

\_atom\_site\_label  
 \_atom\_site\_occupancy  
 \_atom\_site\_fract\_x  
 \_atom\_site\_fract\_y  
 \_atom\_site\_fract\_z  
 \_atom\_site\_thermal\_displace\_type  
 \_atom\_site\_B\_iso\_or\_equiv  
 \_atom\_site\_type\_symbol

|     |        |         |         |         |      |       |    |
|-----|--------|---------|---------|---------|------|-------|----|
| P1  | 1.0000 | 0.04247 | 0.16755 | 0.52089 | Biso | 1.000 | P  |
| O1  | 1.0000 | 0.07590 | 0.29132 | 0.51053 | Biso | 1.000 | O  |
| O2  | 1.0000 | 0.27993 | 0.39360 | 0.83567 | Biso | 1.000 | O  |
| O3  | 1.0000 | 0.13667 | 0.48396 | 0.79611 | Biso | 1.000 | O  |
| Al1 | 1.0000 | 0.25100 | 0.26800 | 0.06450 | Biso | 1.000 | Al |
| O4  | 1.0000 | 0.17734 | 0.11106 | 0.28252 | Biso | 1.000 | O  |
| Al2 | 1.0000 | 0.04790 | 0.16835 | 0.72805 | Biso | 1.000 | Al |
| P2  | 1.0000 | 0.15115 | 0.06178 | 0.18739 | Biso | 1.000 | P  |
| Al3 | 1.0000 | 0.15288 | 0.06069 | 0.39448 | Biso | 1.000 | Al |
| O5  | 1.0000 | 0.07167 | 0.14667 | 0.61640 | Biso | 1.000 | O  |
| P3  | 1.0000 | 0.25713 | 0.27323 | 0.85232 | Biso | 1.000 | P  |
| O6  | 1.0000 | 0.36383 | 0.27019 | 0.82806 | Biso | 1.000 | O  |
| O7  | 1.0000 | 0.24074 | 0.03099 | 0.15754 | Biso | 1.000 | O  |
| O8  | 1.0000 | 0.47909 | 0.18819 | 0.13604 | Biso | 1.000 | O  |
| Al4 | 1.0000 | 0.04679 | 0.39912 | 0.52695 | Biso | 1.000 | Al |
| O9  | 1.0000 | 0.16273 | 0.18855 | 0.79184 | Biso | 1.000 | O  |
| P4  | 1.0000 | 0.25553 | 0.49625 | 0.06828 | Biso | 1.000 | P  |
| Al5 | 1.0000 | 0.37750 | 0.06314 | 0.18663 | Biso | 1.000 | Al |

|      |        |         |         |         |      |       |    |
|------|--------|---------|---------|---------|------|-------|----|
| O10  | 1.0000 | 0.23508 | 0.38110 | 0.09885 | Biso | 1.000 | O  |
| O11  | 1.0000 | 0.02470 | 0.28247 | 0.74049 | Biso | 1.000 | O  |
| O12  | 1.0000 | 0.39900 | 0.08571 | 0.30185 | Biso | 1.000 | O  |
| O13  | 1.0000 | 0.11200 | 0.14461 | 0.45370 | Biso | 1.000 | O  |
| O14  | 1.0000 | 0.07384 | 0.44706 | 0.63800 | Biso | 1.000 | O  |
| P5   | 1.0000 | 0.36736 | 0.05366 | 0.40037 | Biso | 1.000 | P  |
| O15  | 1.0000 | 0.28978 | 0.09601 | 0.43437 | Biso | 1.000 | O  |
| O16  | 1.0000 | 0.39051 | 0.30327 | 0.08783 | Biso | 1.000 | O  |
| P6   | 1.0000 | 0.04233 | 0.40225 | 0.73403 | Biso | 1.000 | P  |
| Al6  | 1.0000 | 0.48747 | 0.27669 | 0.86347 | Biso | 1.000 | Al |
| O17  | 1.0000 | 0.15360 | 0.15070 | 0.12347 | Biso | 1.000 | O  |
| Al7  | 1.0000 | 0.93078 | 0.60754 | 0.40286 | Biso | 1.000 | Al |
| P7   | 1.0000 | 0.72025 | 0.50772 | 0.85971 | Biso | 1.000 | P  |
| Al8  | 1.0000 | 0.58843 | 0.93951 | 0.73854 | Biso | 1.000 | Al |
| O18  | 1.0000 | 0.73007 | 0.62232 | 0.84271 | Biso | 1.000 | O  |
| O19  | 1.0000 | 0.95173 | 0.72562 | 0.15845 | Biso | 1.000 | O  |
| O20  | 1.0000 | 0.81512 | 0.82395 | 0.12607 | Biso | 1.000 | O  |
| O21  | 1.0000 | 0.56520 | 0.90832 | 0.62451 | Biso | 1.000 | O  |
| O22  | 1.0000 | 0.85720 | 0.86357 | 0.47325 | Biso | 1.000 | O  |
| O23  | 1.0000 | 0.91696 | 0.59075 | 0.28645 | Biso | 1.000 | O  |
| P8   | 1.0000 | 0.59572 | 0.94380 | 0.52618 | Biso | 1.000 | P  |
| O24  | 1.0000 | 0.67754 | 0.90734 | 0.49080 | Biso | 1.000 | O  |
| O25  | 1.0000 | 0.57101 | 0.69903 | 0.83487 | Biso | 1.000 | O  |
| O26  | 1.0000 | 0.80582 | 0.83986 | 0.78698 | Biso | 1.000 | O  |
| P9   | 1.0000 | 0.92932 | 0.60800 | 0.18499 | Biso | 1.000 | P  |
| Al9  | 1.0000 | 0.48236 | 0.72462 | 0.06414 | Biso | 1.000 | Al |
| Si1  | 1.0000 | 0.92421 | 0.82655 | 0.40539 | Biso | 1.000 | Si |
| O27  | 1.0000 | 0.90868 | 0.70947 | 0.44945 | Biso | 1.000 | O  |
| O28  | 1.0000 | 0.69577 | 0.62201 | 0.07231 | Biso | 1.000 | O  |
| O29  | 1.0000 | 0.48629 | 0.88891 | 0.47224 | Biso | 1.000 | O  |
| Al10 | 1.0000 | 0.71134 | 0.73742 | 0.86122 | Biso | 1.000 | Al |
| O30  | 1.0000 | 0.81307 | 0.92409 | 0.63973 | Biso | 1.000 | O  |
| O31  | 1.0000 | 0.82040 | 0.51673 | 0.14053 | Biso | 1.000 | O  |
| P10  | 1.0000 | 0.81833 | 0.94581 | 0.74061 | Biso | 1.000 | P  |
| Al11 | 1.0000 | 0.91718 | 0.82664 | 0.19890 | Biso | 1.000 | Al |
| Al12 | 1.0000 | 0.81770 | 0.94889 | 0.52261 | Biso | 1.000 | Al |
| O32  | 1.0000 | 0.86796 | 0.79904 | 0.30643 | Biso | 1.000 | O  |
| O33  | 1.0000 | 0.82839 | 0.47746 | 0.44769 | Biso | 1.000 | O  |
| O34  | 1.0000 | 0.48616 | 0.82054 | 0.79412 | Biso | 1.000 | O  |
| P11  | 1.0000 | 0.71666 | 0.74328 | 0.06806 | Biso | 1.000 | P  |
| O35  | 1.0000 | 0.61040 | 0.74250 | 0.10179 | Biso | 1.000 | O  |
| O36  | 1.0000 | 0.72292 | 0.96685 | 0.77027 | Biso | 1.000 | O  |
| O37  | 1.0000 | 0.82720 | 0.43976 | 0.61201 | Biso | 1.000 | O  |
| O38  | 1.0000 | 0.47758 | 0.10711 | 0.45388 | Biso | 1.000 | O  |

|      |        |         |         |         |      |       |    |
|------|--------|---------|---------|---------|------|-------|----|
| O39  | 1.0000 | 0.65436 | 0.07304 | 0.51895 | Biso | 1.000 | O  |
| P12  | 1.0000 | 0.81532 | 0.39015 | 0.51706 | Biso | 1.000 | P  |
| O40  | 1.0000 | 0.69649 | 0.28981 | 0.50515 | Biso | 1.000 | O  |
| O41  | 1.0000 | 0.59500 | 0.41720 | 0.85109 | Biso | 1.000 | O  |
| O42  | 1.0000 | 0.50633 | 0.18740 | 0.79250 | Biso | 1.000 | O  |
| AI13 | 1.0000 | 0.72207 | 0.50978 | 0.06344 | Biso | 1.000 | AI |
| O43  | 1.0000 | 0.91442 | 0.09383 | 0.50476 | Biso | 1.000 | O  |
| AI14 | 1.0000 | 0.81359 | 0.39752 | 0.72454 | Biso | 1.000 | AI |
| O44  | 1.0000 | 0.90437 | 0.35405 | 0.50267 | Biso | 1.000 | O  |
| P13  | 1.0000 | 0.58080 | 0.16034 | 0.73390 | Biso | 1.000 | P  |
| O45  | 1.0000 | 0.57660 | 0.05478 | 0.77208 | Biso | 1.000 | O  |
| AI15 | 1.0000 | 0.58906 | 0.15448 | 0.52876 | Biso | 1.000 | AI |
| O46  | 1.0000 | 0.93050 | 0.04702 | 0.76916 | Biso | 1.000 | O  |
| O47  | 1.0000 | 0.78976 | 0.49022 | 0.78816 | Biso | 1.000 | O  |
| P14  | 1.0000 | 0.48629 | 0.27766 | 0.07086 | Biso | 1.000 | P  |
| O48  | 1.0000 | 0.59762 | 0.38582 | 0.08697 | Biso | 1.000 | O  |
| O49  | 1.0000 | 0.70332 | 0.25798 | 0.73450 | Biso | 1.000 | O  |
| O50  | 1.0000 | 0.93385 | 0.39909 | 0.76368 | Biso | 1.000 | O  |
| O51  | 1.0000 | 0.53442 | 0.13799 | 0.63774 | Biso | 1.000 | O  |
| O52  | 1.0000 | 0.49506 | 0.77499 | 0.95417 | Biso | 1.000 | O  |
| O53  | 1.0000 | 0.76553 | 0.50402 | 0.95311 | Biso | 1.000 | O  |
| O54  | 1.0000 | 0.74189 | 0.78635 | 0.97076 | Biso | 1.000 | O  |
| P15  | 1.0000 | 0.38066 | 0.84353 | 0.19149 | Biso | 1.000 | P  |
| O55  | 1.0000 | 0.40052 | 0.95448 | 0.15031 | Biso | 1.000 | O  |
| AI16 | 1.0000 | 0.37444 | 0.84462 | 0.39693 | Biso | 1.000 | AI |
| P16  | 1.0000 | 0.47963 | 0.73007 | 0.85773 | Biso | 1.000 | P  |
| O56  | 1.0000 | 0.36413 | 0.62616 | 0.84439 | Biso | 1.000 | O  |
| O57  | 1.0000 | 0.25290 | 0.75901 | 0.19328 | Biso | 1.000 | O  |
| O58  | 1.0000 | 0.03488 | 0.95850 | 0.18080 | Biso | 1.000 | O  |
| O59  | 1.0000 | 0.20081 | 0.53703 | 0.13588 | Biso | 1.000 | O  |
| O60  | 1.0000 | 0.14734 | 0.50757 | 0.46081 | Biso | 1.000 | O  |
| O61  | 1.0000 | 0.02697 | 0.59307 | 0.15072 | Biso | 1.000 | O  |
| O62  | 1.0000 | 0.42837 | 0.86434 | 0.28736 | Biso | 1.000 | O  |
| O63  | 1.0000 | 0.13702 | 0.56596 | 0.30566 | Biso | 1.000 | O  |
| O64  | 1.0000 | 0.30795 | 0.92457 | 0.41115 | Biso | 1.000 | O  |
| P17  | 1.0000 | 0.15510 | 0.60407 | 0.40397 | Biso | 1.000 | P  |
| O65  | 1.0000 | 0.27297 | 0.70564 | 0.41756 | Biso | 1.000 | O  |
| O66  | 1.0000 | 0.38378 | 0.57904 | 0.06380 | Biso | 1.000 | O  |
| AI17 | 1.0000 | 0.24523 | 0.49661 | 0.86386 | Biso | 1.000 | AI |
| O67  | 1.0000 | 0.05746 | 0.91969 | 0.39947 | Biso | 1.000 | O  |
| O68  | 1.0000 | 0.44202 | 0.79792 | 0.13534 | Biso | 1.000 | O  |
| O69  | 1.0000 | 0.06602 | 0.63369 | 0.43420 | Biso | 1.000 | O  |
| AI18 | 1.0000 | 0.15356 | 0.61403 | 0.19515 | Biso | 1.000 | AI |
| O70  | 1.0000 | 0.22332 | 0.23928 | 0.95020 | Biso | 1.000 | O  |

|     |        |         |         |         |      |       |   |
|-----|--------|---------|---------|---------|------|-------|---|
| O71 | 1.0000 | 0.47956 | 0.23368 | 0.97472 | Biso | 1.000 | O |
| O72 | 1.0000 | 0.20188 | 0.48625 | 0.97565 | Biso | 1.000 | O |
| H1  | 1.0000 | 0.86444 | 0.69810 | 0.55601 | Biso | 1.000 | H |
| C1  | 1.0000 | 0.67748 | 0.60747 | 0.62121 | Biso | 1.000 | C |
| O73 | 1.0000 | 0.84012 | 0.69165 | 0.61977 | Biso | 1.000 | O |
| H2  | 1.0000 | 0.67757 | 0.60491 | 0.69232 | Biso | 1.000 | H |
| H3  | 1.0000 | 0.67539 | 0.54015 | 0.58372 | Biso | 1.000 | H |
| H4  | 1.0000 | 0.66496 | 0.66871 | 0.58676 | Biso | 1.000 | H |
| H5  | 1.0000 | 0.85906 | 0.76719 | 0.63688 | Biso | 1.000 | H |
| C2  | 1.0000 | 0.35870 | 0.41898 | 0.32058 | Biso | 1.000 | C |
| H6  | 1.0000 | 0.35652 | 0.35262 | 0.27987 | Biso | 1.000 | H |
| H7  | 1.0000 | 0.29735 | 0.38113 | 0.37388 | Biso | 1.000 | H |
| H8  | 1.0000 | 0.33495 | 0.46825 | 0.27872 | Biso | 1.000 | H |
| C3  | 1.0000 | 0.56272 | 0.54719 | 0.28182 | Biso | 1.000 | C |
| C4  | 1.0000 | 0.50208 | 0.41641 | 0.41461 | Biso | 1.000 | C |
| C5  | 1.0000 | 0.54309 | 0.35118 | 0.36301 | Biso | 1.000 | C |
| C6  | 1.0000 | 0.48271 | 0.40596 | 0.50377 | Biso | 1.000 | C |
| C7  | 1.0000 | 0.48038 | 0.31482 | 0.55968 | Biso | 1.000 | C |
| C8  | 1.0000 | 0.46709 | 0.48842 | 0.55203 | Biso | 1.000 | C |
| C9  | 1.0000 | 0.48050 | 0.49646 | 0.64354 | Biso | 1.000 | C |
| C10 | 1.0000 | 0.45337 | 0.57196 | 0.50368 | Biso | 1.000 | C |
| C11 | 1.0000 | 0.42212 | 0.64283 | 0.55942 | Biso | 1.000 | C |
| C12 | 1.0000 | 0.47157 | 0.58279 | 0.41437 | Biso | 1.000 | C |
| C13 | 1.0000 | 0.48210 | 0.67979 | 0.36248 | Biso | 1.000 | C |
| C14 | 1.0000 | 0.47964 | 0.49497 | 0.35997 | Biso | 1.000 | C |
| H9  | 1.0000 | 0.56410 | 0.48284 | 0.24122 | Biso | 1.000 | H |
| H10 | 1.0000 | 0.64747 | 0.60400 | 0.30580 | Biso | 1.000 | H |
| H11 | 1.0000 | 0.53815 | 0.59392 | 0.23825 | Biso | 1.000 | H |
| H12 | 1.0000 | 0.49206 | 0.31154 | 0.30438 | Biso | 1.000 | H |
| H13 | 1.0000 | 0.54745 | 0.28798 | 0.40174 | Biso | 1.000 | H |
| H14 | 1.0000 | 0.62798 | 0.40792 | 0.33910 | Biso | 1.000 | H |
| H15 | 1.0000 | 0.47042 | 0.24661 | 0.51870 | Biso | 1.000 | H |
| H16 | 1.0000 | 0.40829 | 0.28004 | 0.60443 | Biso | 1.000 | H |
| H17 | 1.0000 | 0.55495 | 0.34394 | 0.60103 | Biso | 1.000 | H |
| H18 | 1.0000 | 0.46815 | 0.55541 | 0.68182 | Biso | 1.000 | H |
| H19 | 1.0000 | 0.48511 | 0.43296 | 0.68190 | Biso | 1.000 | H |
| H20 | 1.0000 | 0.39580 | 0.69080 | 0.52018 | Biso | 1.000 | H |
| H21 | 1.0000 | 0.49005 | 0.70019 | 0.60283 | Biso | 1.000 | H |
| H22 | 1.0000 | 0.35157 | 0.58860 | 0.60241 | Biso | 1.000 | H |
| H23 | 1.0000 | 0.42103 | 0.65396 | 0.30864 | Biso | 1.000 | H |
| H24 | 1.0000 | 0.56507 | 0.72615 | 0.33224 | Biso | 1.000 | H |
| H25 | 1.0000 | 0.47413 | 0.73775 | 0.40521 | Biso | 1.000 | H |

TS4-5 in HMB-based pathway

data\_image0

\_cell\_length\_a 13.8042  
 \_cell\_length\_b 13.8042  
 \_cell\_length\_c 15.044  
 \_cell\_angle\_alpha 90  
 \_cell\_angle\_beta 90  
 \_cell\_angle\_gamma 120

\_symmetry\_space\_group\_name\_H-M P 1

\_symmetry\_int\_tables\_number 1

loop\_

\_symmetry\_equiv\_pos\_as\_xyz  
 'x, y, z'

loop\_

\_atom\_site\_label  
 \_atom\_site\_occupancy  
 \_atom\_site\_fract\_x  
 \_atom\_site\_fract\_y  
 \_atom\_site\_fract\_z  
 \_atom\_site\_thermal\_displace\_type  
 \_atom\_site\_B\_iso\_or\_equiv  
 \_atom\_site\_type\_symbol

|     |        |         |         |         |      |       |    |
|-----|--------|---------|---------|---------|------|-------|----|
| P1  | 1.0000 | 0.05649 | 0.18441 | 0.50838 | Biso | 1.000 | P  |
| O1  | 1.0000 | 0.07960 | 0.30439 | 0.49508 | Biso | 1.000 | O  |
| O2  | 1.0000 | 0.28974 | 0.40055 | 0.83790 | Biso | 1.000 | O  |
| O3  | 1.0000 | 0.15063 | 0.49142 | 0.78285 | Biso | 1.000 | O  |
| Al1 | 1.0000 | 0.26352 | 0.27834 | 0.05353 | Biso | 1.000 | Al |
| O4  | 1.0000 | 0.15970 | 0.08340 | 0.27361 | Biso | 1.000 | O  |
| Al2 | 1.0000 | 0.06636 | 0.18099 | 0.71182 | Biso | 1.000 | Al |
| P2  | 1.0000 | 0.15678 | 0.07026 | 0.17209 | Biso | 1.000 | P  |
| Al3 | 1.0000 | 0.15779 | 0.06793 | 0.39078 | Biso | 1.000 | Al |
| O5  | 1.0000 | 0.10301 | 0.17413 | 0.60020 | Biso | 1.000 | O  |
| P3  | 1.0000 | 0.26617 | 0.27885 | 0.84798 | Biso | 1.000 | P  |
| O6  | 1.0000 | 0.37602 | 0.27929 | 0.82902 | Biso | 1.000 | O  |
| O7  | 1.0000 | 0.25314 | 0.05043 | 0.14096 | Biso | 1.000 | O  |
| O8  | 1.0000 | 0.49209 | 0.20241 | 0.13174 | Biso | 1.000 | O  |
| Al4 | 1.0000 | 0.05209 | 0.41231 | 0.51467 | Biso | 1.000 | Al |
| O9  | 1.0000 | 0.17827 | 0.20091 | 0.77982 | Biso | 1.000 | O  |
| P4  | 1.0000 | 0.26360 | 0.51059 | 0.05782 | Biso | 1.000 | P  |
| Al5 | 1.0000 | 0.38557 | 0.07560 | 0.17559 | Biso | 1.000 | Al |

|      |        |         |         |         |      |       |    |
|------|--------|---------|---------|---------|------|-------|----|
| O10  | 1.0000 | 0.25715 | 0.39867 | 0.07723 | Biso | 1.000 | O  |
| O11  | 1.0000 | 0.03651 | 0.29056 | 0.72659 | Biso | 1.000 | O  |
| O12  | 1.0000 | 0.40263 | 0.09036 | 0.29114 | Biso | 1.000 | O  |
| O13  | 1.0000 | 0.11893 | 0.16280 | 0.43365 | Biso | 1.000 | O  |
| O14  | 1.0000 | 0.08209 | 0.45693 | 0.62639 | Biso | 1.000 | O  |
| P5   | 1.0000 | 0.37616 | 0.06957 | 0.39127 | Biso | 1.000 | P  |
| O15  | 1.0000 | 0.29996 | 0.11536 | 0.42125 | Biso | 1.000 | O  |
| O16  | 1.0000 | 0.40354 | 0.31138 | 0.06856 | Biso | 1.000 | O  |
| P6   | 1.0000 | 0.05386 | 0.41040 | 0.72222 | Biso | 1.000 | P  |
| AI6  | 1.0000 | 0.50197 | 0.28570 | 0.85871 | Biso | 1.000 | AI |
| O17  | 1.0000 | 0.17157 | 0.17859 | 0.12906 | Biso | 1.000 | O  |
| AI7  | 1.0000 | 0.93669 | 0.62387 | 0.39494 | Biso | 1.000 | AI |
| P7   | 1.0000 | 0.73807 | 0.51984 | 0.85700 | Biso | 1.000 | P  |
| AI8  | 1.0000 | 0.60060 | 0.95201 | 0.72065 | Biso | 1.000 | AI |
| O18  | 1.0000 | 0.74462 | 0.63229 | 0.83562 | Biso | 1.000 | O  |
| O19  | 1.0000 | 0.96497 | 0.73500 | 0.14025 | Biso | 1.000 | O  |
| O20  | 1.0000 | 0.81606 | 0.82309 | 0.12677 | Biso | 1.000 | O  |
| O21  | 1.0000 | 0.56242 | 0.92397 | 0.60766 | Biso | 1.000 | O  |
| O22  | 1.0000 | 0.85077 | 0.87525 | 0.44080 | Biso | 1.000 | O  |
| O23  | 1.0000 | 0.93264 | 0.61359 | 0.27812 | Biso | 1.000 | O  |
| P8   | 1.0000 | 0.60437 | 0.96269 | 0.51136 | Biso | 1.000 | P  |
| O24  | 1.0000 | 0.68889 | 0.92682 | 0.48369 | Biso | 1.000 | O  |
| O25  | 1.0000 | 0.58599 | 0.70898 | 0.83355 | Biso | 1.000 | O  |
| O26  | 1.0000 | 0.81576 | 0.85397 | 0.78027 | Biso | 1.000 | O  |
| P9   | 1.0000 | 0.93872 | 0.61905 | 0.17593 | Biso | 1.000 | P  |
| AI9  | 1.0000 | 0.49338 | 0.74512 | 0.05208 | Biso | 1.000 | AI |
| Si1  | 1.0000 | 0.94077 | 0.84482 | 0.39950 | Biso | 1.000 | Si |
| O27  | 1.0000 | 0.90457 | 0.71965 | 0.44165 | Biso | 1.000 | O  |
| O28  | 1.0000 | 0.69733 | 0.62678 | 0.06179 | Biso | 1.000 | O  |
| O29  | 1.0000 | 0.50306 | 0.90916 | 0.44834 | Biso | 1.000 | O  |
| AI10 | 1.0000 | 0.72769 | 0.74845 | 0.85494 | Biso | 1.000 | AI |
| O30  | 1.0000 | 0.82452 | 0.91132 | 0.62239 | Biso | 1.000 | O  |
| O31  | 1.0000 | 0.82441 | 0.52707 | 0.13945 | Biso | 1.000 | O  |
| P10  | 1.0000 | 0.83172 | 0.95161 | 0.72037 | Biso | 1.000 | P  |
| AI11 | 1.0000 | 0.93920 | 0.84246 | 0.17943 | Biso | 1.000 | AI |
| AI12 | 1.0000 | 0.82704 | 0.95869 | 0.50940 | Biso | 1.000 | AI |
| O32  | 1.0000 | 0.92880 | 0.83562 | 0.29235 | Biso | 1.000 | O  |
| O33  | 1.0000 | 0.83592 | 0.49346 | 0.43948 | Biso | 1.000 | O  |
| O34  | 1.0000 | 0.50705 | 0.82981 | 0.77766 | Biso | 1.000 | O  |
| P11  | 1.0000 | 0.72522 | 0.75050 | 0.05955 | Biso | 1.000 | P  |
| O35  | 1.0000 | 0.61883 | 0.75383 | 0.08541 | Biso | 1.000 | O  |
| O36  | 1.0000 | 0.74018 | 0.98307 | 0.73780 | Biso | 1.000 | O  |
| O37  | 1.0000 | 0.84200 | 0.45855 | 0.60482 | Biso | 1.000 | O  |
| O38  | 1.0000 | 0.48876 | 0.12981 | 0.44109 | Biso | 1.000 | O  |

|      |        |         |         |         |      |       |    |
|------|--------|---------|---------|---------|------|-------|----|
| O39  | 1.0000 | 0.66341 | 0.09209 | 0.50597 | Biso | 1.000 | O  |
| P12  | 1.0000 | 0.82377 | 0.40736 | 0.50973 | Biso | 1.000 | P  |
| O40  | 1.0000 | 0.70310 | 0.30957 | 0.50059 | Biso | 1.000 | O  |
| O41  | 1.0000 | 0.61349 | 0.42578 | 0.85822 | Biso | 1.000 | O  |
| O42  | 1.0000 | 0.51991 | 0.20027 | 0.78289 | Biso | 1.000 | O  |
| AI13 | 1.0000 | 0.73345 | 0.52090 | 0.05563 | Biso | 1.000 | AI |
| O43  | 1.0000 | 0.92763 | 0.10357 | 0.50567 | Biso | 1.000 | O  |
| AI14 | 1.0000 | 0.82692 | 0.40912 | 0.71592 | Biso | 1.000 | AI |
| O44  | 1.0000 | 0.90926 | 0.36728 | 0.49257 | Biso | 1.000 | O  |
| P13  | 1.0000 | 0.59205 | 0.17248 | 0.72213 | Biso | 1.000 | P  |
| O45  | 1.0000 | 0.58982 | 0.06679 | 0.75874 | Biso | 1.000 | O  |
| AI15 | 1.0000 | 0.59689 | 0.17228 | 0.51849 | Biso | 1.000 | AI |
| O46  | 1.0000 | 0.94650 | 0.05389 | 0.74089 | Biso | 1.000 | O  |
| O47  | 1.0000 | 0.80345 | 0.49788 | 0.78463 | Biso | 1.000 | O  |
| P14  | 1.0000 | 0.49976 | 0.28498 | 0.05954 | Biso | 1.000 | P  |
| O48  | 1.0000 | 0.61064 | 0.39410 | 0.07291 | Biso | 1.000 | O  |
| O49  | 1.0000 | 0.71468 | 0.26993 | 0.71976 | Biso | 1.000 | O  |
| O50  | 1.0000 | 0.94552 | 0.40599 | 0.75445 | Biso | 1.000 | O  |
| O51  | 1.0000 | 0.54101 | 0.15056 | 0.62736 | Biso | 1.000 | O  |
| O52  | 1.0000 | 0.49935 | 0.78802 | 0.94042 | Biso | 1.000 | O  |
| O53  | 1.0000 | 0.79126 | 0.52557 | 0.94911 | Biso | 1.000 | O  |
| O54  | 1.0000 | 0.76395 | 0.79875 | 0.96448 | Biso | 1.000 | O  |
| P15  | 1.0000 | 0.38588 | 0.85458 | 0.17264 | Biso | 1.000 | P  |
| O55  | 1.0000 | 0.40307 | 0.96590 | 0.13502 | Biso | 1.000 | O  |
| AI16 | 1.0000 | 0.37834 | 0.85893 | 0.38770 | Biso | 1.000 | AI |
| P16  | 1.0000 | 0.49322 | 0.74052 | 0.84578 | Biso | 1.000 | P  |
| O56  | 1.0000 | 0.37901 | 0.63570 | 0.82846 | Biso | 1.000 | O  |
| O57  | 1.0000 | 0.26375 | 0.76130 | 0.15392 | Biso | 1.000 | O  |
| O58  | 1.0000 | 0.04540 | 0.97237 | 0.13870 | Biso | 1.000 | O  |
| O59  | 1.0000 | 0.19458 | 0.52803 | 0.12975 | Biso | 1.000 | O  |
| O60  | 1.0000 | 0.14903 | 0.52082 | 0.44658 | Biso | 1.000 | O  |
| O61  | 1.0000 | 0.02999 | 0.59440 | 0.14179 | Biso | 1.000 | O  |
| O62  | 1.0000 | 0.40984 | 0.86535 | 0.27356 | Biso | 1.000 | O  |
| O63  | 1.0000 | 0.15629 | 0.60029 | 0.29583 | Biso | 1.000 | O  |
| O64  | 1.0000 | 0.31731 | 0.94219 | 0.41034 | Biso | 1.000 | O  |
| P17  | 1.0000 | 0.16267 | 0.62430 | 0.39653 | Biso | 1.000 | P  |
| O65  | 1.0000 | 0.27876 | 0.72357 | 0.42034 | Biso | 1.000 | O  |
| O66  | 1.0000 | 0.38812 | 0.60381 | 0.06142 | Biso | 1.000 | O  |
| AI17 | 1.0000 | 0.25828 | 0.50861 | 0.85403 | Biso | 1.000 | AI |
| O67  | 1.0000 | 0.06927 | 0.93396 | 0.42822 | Biso | 1.000 | O  |
| O68  | 1.0000 | 0.47013 | 0.82908 | 0.12616 | Biso | 1.000 | O  |
| O69  | 1.0000 | 0.07202 | 0.65161 | 0.42670 | Biso | 1.000 | O  |
| AI18 | 1.0000 | 0.16125 | 0.62194 | 0.18041 | Biso | 1.000 | AI |
| O70  | 1.0000 | 0.22212 | 0.23384 | 0.94254 | Biso | 1.000 | O  |



|     |        |         |         |         |      |       |   |
|-----|--------|---------|---------|---------|------|-------|---|
| O71 | 1.0000 | 0.49473 | 0.23307 | 0.96692 | Biso | 1.000 | O |
| O72 | 1.0000 | 0.21460 | 0.50932 | 0.96459 | Biso | 1.000 | O |
| H1  | 1.0000 | 0.81894 | 0.68859 | 0.52707 | Biso | 1.000 | H |
| C1  | 1.0000 | 0.55628 | 0.49064 | 0.68262 | Biso | 1.000 | C |
| O73 | 1.0000 | 0.77810 | 0.68220 | 0.58531 | Biso | 1.000 | O |
| H2  | 1.0000 | 0.57293 | 0.53553 | 0.74479 | Biso | 1.000 | H |
| H3  | 1.0000 | 0.47528 | 0.41478 | 0.68964 | Biso | 1.000 | H |
| H4  | 1.0000 | 0.61958 | 0.46630 | 0.67395 | Biso | 1.000 | H |
| H5  | 1.0000 | 0.80009 | 0.75923 | 0.60253 | Biso | 1.000 | H |
| C2  | 1.0000 | 0.66504 | 0.62216 | 0.30115 | Biso | 1.000 | C |
| H6  | 1.0000 | 0.67263 | 0.69147 | 0.26145 | Biso | 1.000 | H |
| H7  | 1.0000 | 0.71885 | 0.65665 | 0.35892 | Biso | 1.000 | H |
| H8  | 1.0000 | 0.69450 | 0.57602 | 0.26146 | Biso | 1.000 | H |
| C3  | 1.0000 | 0.46498 | 0.49355 | 0.24944 | Biso | 1.000 | C |
| C4  | 1.0000 | 0.50563 | 0.61562 | 0.38177 | Biso | 1.000 | C |
| C5  | 1.0000 | 0.48859 | 0.69682 | 0.32731 | Biso | 1.000 | C |
| C6  | 1.0000 | 0.49175 | 0.60800 | 0.47114 | Biso | 1.000 | C |
| C7  | 1.0000 | 0.44231 | 0.66467 | 0.52463 | Biso | 1.000 | C |
| C8  | 1.0000 | 0.52115 | 0.53644 | 0.52131 | Biso | 1.000 | C |
| C9  | 1.0000 | 0.55544 | 0.56496 | 0.60929 | Biso | 1.000 | C |
| C10 | 1.0000 | 0.51653 | 0.44197 | 0.47506 | Biso | 1.000 | C |
| C11 | 1.0000 | 0.48351 | 0.33761 | 0.52785 | Biso | 1.000 | C |
| C12 | 1.0000 | 0.53579 | 0.44985 | 0.38606 | Biso | 1.000 | C |
| C13 | 1.0000 | 0.55059 | 0.36448 | 0.33529 | Biso | 1.000 | C |
| C14 | 1.0000 | 0.54261 | 0.54503 | 0.33171 | Biso | 1.000 | C |
| H9  | 1.0000 | 0.46737 | 0.55819 | 0.20688 | Biso | 1.000 | H |
| H10 | 1.0000 | 0.37839 | 0.43840 | 0.27034 | Biso | 1.000 | H |
| H11 | 1.0000 | 0.49122 | 0.44563 | 0.20905 | Biso | 1.000 | H |
| H12 | 1.0000 | 0.53920 | 0.72185 | 0.26726 | Biso | 1.000 | H |
| H13 | 1.0000 | 0.51282 | 0.77268 | 0.36453 | Biso | 1.000 | H |
| H14 | 1.0000 | 0.40122 | 0.66017 | 0.30680 | Biso | 1.000 | H |
| H15 | 1.0000 | 0.40073 | 0.69609 | 0.48325 | Biso | 1.000 | H |
| H16 | 1.0000 | 0.50368 | 0.73303 | 0.56530 | Biso | 1.000 | H |
| H17 | 1.0000 | 0.37917 | 0.60407 | 0.57017 | Biso | 1.000 | H |
| H18 | 1.0000 | 0.67935 | 0.63087 | 0.58404 | Biso | 1.000 | H |
| H19 | 1.0000 | 0.54629 | 0.63323 | 0.63532 | Biso | 1.000 | H |
| H20 | 1.0000 | 0.45780 | 0.26751 | 0.48394 | Biso | 1.000 | H |
| H21 | 1.0000 | 0.41105 | 0.31820 | 0.56936 | Biso | 1.000 | H |
| H22 | 1.0000 | 0.54914 | 0.34411 | 0.57160 | Biso | 1.000 | H |
| H23 | 1.0000 | 0.60778 | 0.40222 | 0.27955 | Biso | 1.000 | H |
| H24 | 1.0000 | 0.47119 | 0.30041 | 0.30740 | Biso | 1.000 | H |
| H25 | 1.0000 | 0.58394 | 0.32372 | 0.37641 | Biso | 1.000 | H |

TS5-6 in HMB-based pathway

data\_image0

\_cell\_length\_a 13.8042  
 \_cell\_length\_b 13.8042  
 \_cell\_length\_c 15.044  
 \_cell\_angle\_alpha 90  
 \_cell\_angle\_beta 90  
 \_cell\_angle\_gamma 120

\_symmetry\_space\_group\_name\_H-M P 1

\_symmetry\_int\_tables\_number 1

loop\_

\_symmetry\_equiv\_pos\_as\_xyz  
 'x, y, z'

loop\_

\_atom\_site\_label  
 \_atom\_site\_occupancy  
 \_atom\_site\_fract\_x  
 \_atom\_site\_fract\_y  
 \_atom\_site\_fract\_z  
 \_atom\_site\_thermal\_displace\_type  
 \_atom\_site\_B\_iso\_or\_equiv  
 \_atom\_site\_type\_symbol

|     |        |         |         |         |      |       |    |
|-----|--------|---------|---------|---------|------|-------|----|
| P1  | 1.0000 | 0.04979 | 0.18408 | 0.52339 | Biso | 1.000 | P  |
| O1  | 1.0000 | 0.07430 | 0.30533 | 0.51934 | Biso | 1.000 | O  |
| O2  | 1.0000 | 0.28787 | 0.40097 | 0.85873 | Biso | 1.000 | O  |
| O3  | 1.0000 | 0.14091 | 0.48531 | 0.80023 | Biso | 1.000 | O  |
| Al1 | 1.0000 | 0.25815 | 0.27941 | 0.06669 | Biso | 1.000 | Al |
| O4  | 1.0000 | 0.15805 | 0.09253 | 0.29013 | Biso | 1.000 | O  |
| Al2 | 1.0000 | 0.05192 | 0.18135 | 0.72848 | Biso | 1.000 | Al |
| P2  | 1.0000 | 0.14969 | 0.07770 | 0.18877 | Biso | 1.000 | P  |
| Al3 | 1.0000 | 0.15788 | 0.07606 | 0.40704 | Biso | 1.000 | Al |
| O5  | 1.0000 | 0.07968 | 0.15985 | 0.61772 | Biso | 1.000 | O  |
| P3  | 1.0000 | 0.25486 | 0.27591 | 0.86519 | Biso | 1.000 | P  |
| O6  | 1.0000 | 0.35973 | 0.26627 | 0.84826 | Biso | 1.000 | O  |
| O7  | 1.0000 | 0.24280 | 0.05525 | 0.15344 | Biso | 1.000 | O  |
| O8  | 1.0000 | 0.48368 | 0.19802 | 0.14192 | Biso | 1.000 | O  |
| Al4 | 1.0000 | 0.05291 | 0.41821 | 0.53056 | Biso | 1.000 | Al |
| O9  | 1.0000 | 0.16792 | 0.20684 | 0.79351 | Biso | 1.000 | O  |
| P4  | 1.0000 | 0.25771 | 0.51327 | 0.07248 | Biso | 1.000 | P  |
| Al5 | 1.0000 | 0.37325 | 0.07408 | 0.18672 | Biso | 1.000 | Al |

|      |        |         |         |         |      |       |    |
|------|--------|---------|---------|---------|------|-------|----|
| O10  | 1.0000 | 0.26162 | 0.40549 | 0.08576 | Biso | 1.000 | O  |
| O11  | 1.0000 | 0.02093 | 0.29117 | 0.73433 | Biso | 1.000 | O  |
| O12  | 1.0000 | 0.39206 | 0.09331 | 0.30169 | Biso | 1.000 | O  |
| O13  | 1.0000 | 0.12634 | 0.17437 | 0.45412 | Biso | 1.000 | O  |
| O14  | 1.0000 | 0.07990 | 0.46651 | 0.64176 | Biso | 1.000 | O  |
| P5   | 1.0000 | 0.37157 | 0.06971 | 0.40212 | Biso | 1.000 | P  |
| O15  | 1.0000 | 0.29868 | 0.11650 | 0.43821 | Biso | 1.000 | O  |
| O16  | 1.0000 | 0.39785 | 0.30771 | 0.07481 | Biso | 1.000 | O  |
| P6   | 1.0000 | 0.04540 | 0.41369 | 0.73544 | Biso | 1.000 | P  |
| AI6  | 1.0000 | 0.49242 | 0.28453 | 0.87081 | Biso | 1.000 | AI |
| O17  | 1.0000 | 0.16664 | 0.18753 | 0.14683 | Biso | 1.000 | O  |
| AI7  | 1.0000 | 0.93399 | 0.62274 | 0.40445 | Biso | 1.000 | AI |
| P7   | 1.0000 | 0.72125 | 0.51799 | 0.86553 | Biso | 1.000 | P  |
| AI8  | 1.0000 | 0.59019 | 0.95140 | 0.73569 | Biso | 1.000 | AI |
| O18  | 1.0000 | 0.73206 | 0.63170 | 0.84139 | Biso | 1.000 | O  |
| O19  | 1.0000 | 0.96077 | 0.74328 | 0.15521 | Biso | 1.000 | O  |
| O20  | 1.0000 | 0.80819 | 0.82415 | 0.13836 | Biso | 1.000 | O  |
| O21  | 1.0000 | 0.56054 | 0.91904 | 0.62204 | Biso | 1.000 | O  |
| O22  | 1.0000 | 0.84581 | 0.86713 | 0.46669 | Biso | 1.000 | O  |
| O23  | 1.0000 | 0.92696 | 0.61426 | 0.28764 | Biso | 1.000 | O  |
| P8   | 1.0000 | 0.59793 | 0.95686 | 0.52486 | Biso | 1.000 | P  |
| O24  | 1.0000 | 0.68188 | 0.92139 | 0.49383 | Biso | 1.000 | O  |
| O25  | 1.0000 | 0.57922 | 0.71345 | 0.84222 | Biso | 1.000 | O  |
| O26  | 1.0000 | 0.80864 | 0.85391 | 0.79022 | Biso | 1.000 | O  |
| P9   | 1.0000 | 0.93659 | 0.62617 | 0.18566 | Biso | 1.000 | P  |
| AI9  | 1.0000 | 0.48667 | 0.74860 | 0.06597 | Biso | 1.000 | AI |
| Si1  | 1.0000 | 0.93768 | 0.84738 | 0.41464 | Biso | 1.000 | Si |
| O27  | 1.0000 | 0.91473 | 0.72513 | 0.45292 | Biso | 1.000 | O  |
| O28  | 1.0000 | 0.68999 | 0.62606 | 0.07606 | Biso | 1.000 | O  |
| O29  | 1.0000 | 0.49320 | 0.90275 | 0.46542 | Biso | 1.000 | O  |
| AI10 | 1.0000 | 0.71940 | 0.74972 | 0.86557 | Biso | 1.000 | AI |
| O30  | 1.0000 | 0.82254 | 0.93375 | 0.63950 | Biso | 1.000 | O  |
| O31  | 1.0000 | 0.82501 | 0.53386 | 0.14525 | Biso | 1.000 | O  |
| P10  | 1.0000 | 0.82296 | 0.95820 | 0.73978 | Biso | 1.000 | P  |
| AI11 | 1.0000 | 0.93077 | 0.84786 | 0.19511 | Biso | 1.000 | AI |
| AI12 | 1.0000 | 0.82203 | 0.96026 | 0.52257 | Biso | 1.000 | AI |
| O32  | 1.0000 | 0.91696 | 0.84063 | 0.30808 | Biso | 1.000 | O  |
| O33  | 1.0000 | 0.82902 | 0.49407 | 0.44970 | Biso | 1.000 | O  |
| O34  | 1.0000 | 0.49287 | 0.83070 | 0.79233 | Biso | 1.000 | O  |
| P11  | 1.0000 | 0.71753 | 0.74955 | 0.07170 | Biso | 1.000 | P  |
| O35  | 1.0000 | 0.61065 | 0.75245 | 0.09630 | Biso | 1.000 | O  |
| O36  | 1.0000 | 0.72726 | 0.98179 | 0.76316 | Biso | 1.000 | O  |
| O37  | 1.0000 | 0.83111 | 0.45572 | 0.61431 | Biso | 1.000 | O  |
| O38  | 1.0000 | 0.48749 | 0.12619 | 0.44738 | Biso | 1.000 | O  |

|      |        |         |         |         |      |       |    |
|------|--------|---------|---------|---------|------|-------|----|
| O39  | 1.0000 | 0.65684 | 0.08619 | 0.51942 | Biso | 1.000 | O  |
| P12  | 1.0000 | 0.82045 | 0.40790 | 0.51863 | Biso | 1.000 | P  |
| O40  | 1.0000 | 0.70405 | 0.30435 | 0.50622 | Biso | 1.000 | O  |
| O41  | 1.0000 | 0.59510 | 0.42872 | 0.87102 | Biso | 1.000 | O  |
| O42  | 1.0000 | 0.51866 | 0.21098 | 0.78894 | Biso | 1.000 | O  |
| AI13 | 1.0000 | 0.72616 | 0.52047 | 0.06599 | Biso | 1.000 | AI |
| O43  | 1.0000 | 0.92338 | 0.10377 | 0.50433 | Biso | 1.000 | O  |
| AI14 | 1.0000 | 0.81653 | 0.40751 | 0.72572 | Biso | 1.000 | AI |
| O44  | 1.0000 | 0.91256 | 0.37661 | 0.50288 | Biso | 1.000 | O  |
| P13  | 1.0000 | 0.58543 | 0.17401 | 0.73033 | Biso | 1.000 | P  |
| O45  | 1.0000 | 0.57381 | 0.06488 | 0.76872 | Biso | 1.000 | O  |
| AI15 | 1.0000 | 0.59380 | 0.16988 | 0.52693 | Biso | 1.000 | AI |
| O46  | 1.0000 | 0.93483 | 0.05930 | 0.76920 | Biso | 1.000 | O  |
| O47  | 1.0000 | 0.77973 | 0.48864 | 0.79199 | Biso | 1.000 | O  |
| P14  | 1.0000 | 0.49556 | 0.28285 | 0.07027 | Biso | 1.000 | P  |
| O48  | 1.0000 | 0.60576 | 0.39198 | 0.08795 | Biso | 1.000 | O  |
| O49  | 1.0000 | 0.71120 | 0.26458 | 0.72835 | Biso | 1.000 | O  |
| O50  | 1.0000 | 0.93940 | 0.41494 | 0.76681 | Biso | 1.000 | O  |
| O51  | 1.0000 | 0.53626 | 0.15419 | 0.63497 | Biso | 1.000 | O  |
| O52  | 1.0000 | 0.48505 | 0.78007 | 0.95260 | Biso | 1.000 | O  |
| O53  | 1.0000 | 0.77748 | 0.52513 | 0.95647 | Biso | 1.000 | O  |
| O54  | 1.0000 | 0.75611 | 0.79576 | 0.97597 | Biso | 1.000 | O  |
| P15  | 1.0000 | 0.38522 | 0.85777 | 0.18720 | Biso | 1.000 | P  |
| O55  | 1.0000 | 0.37928 | 0.95753 | 0.14722 | Biso | 1.000 | O  |
| AI16 | 1.0000 | 0.37625 | 0.86078 | 0.39648 | Biso | 1.000 | AI |
| P16  | 1.0000 | 0.48282 | 0.73922 | 0.85639 | Biso | 1.000 | P  |
| O56  | 1.0000 | 0.37193 | 0.63230 | 0.83480 | Biso | 1.000 | O  |
| O57  | 1.0000 | 0.26816 | 0.75178 | 0.18053 | Biso | 1.000 | O  |
| O58  | 1.0000 | 0.03580 | 0.98112 | 0.15812 | Biso | 1.000 | O  |
| O59  | 1.0000 | 0.17571 | 0.51563 | 0.14056 | Biso | 1.000 | O  |
| O60  | 1.0000 | 0.15448 | 0.52392 | 0.46269 | Biso | 1.000 | O  |
| O61  | 1.0000 | 0.03172 | 0.60760 | 0.15130 | Biso | 1.000 | O  |
| O62  | 1.0000 | 0.42375 | 0.88207 | 0.28530 | Biso | 1.000 | O  |
| O63  | 1.0000 | 0.13482 | 0.57717 | 0.30762 | Biso | 1.000 | O  |
| O64  | 1.0000 | 0.31241 | 0.94168 | 0.41887 | Biso | 1.000 | O  |
| P17  | 1.0000 | 0.15629 | 0.61742 | 0.40520 | Biso | 1.000 | P  |
| O65  | 1.0000 | 0.27239 | 0.72243 | 0.41427 | Biso | 1.000 | O  |
| O66  | 1.0000 | 0.37712 | 0.61267 | 0.08786 | Biso | 1.000 | O  |
| AI17 | 1.0000 | 0.25311 | 0.50768 | 0.86776 | Biso | 1.000 | AI |
| O67  | 1.0000 | 0.06512 | 0.94213 | 0.44088 | Biso | 1.000 | O  |
| O68  | 1.0000 | 0.47321 | 0.84418 | 0.13407 | Biso | 1.000 | O  |
| O69  | 1.0000 | 0.06625 | 0.64375 | 0.43861 | Biso | 1.000 | O  |
| AI18 | 1.0000 | 0.15341 | 0.61531 | 0.19470 | Biso | 1.000 | AI |
| O70  | 1.0000 | 0.20578 | 0.22918 | 0.95836 | Biso | 1.000 | O  |

|     |        |         |         |         |      |       |   |
|-----|--------|---------|---------|---------|------|-------|---|
| O71 | 1.0000 | 0.49700 | 0.23376 | 0.97758 | Biso | 1.000 | O |
| O72 | 1.0000 | 0.21631 | 0.51899 | 0.97784 | Biso | 1.000 | O |
| H1  | 1.0000 | 0.87907 | 0.71668 | 0.55911 | Biso | 1.000 | H |
| C1  | 1.0000 | 0.48401 | 0.45315 | 0.69903 | Biso | 1.000 | C |
| H2  | 1.0000 | 0.49268 | 0.49497 | 0.76212 | Biso | 1.000 | H |
| H3  | 1.0000 | 0.40188 | 0.37765 | 0.69875 | Biso | 1.000 | H |
| H4  | 1.0000 | 0.54585 | 0.42641 | 0.69716 | Biso | 1.000 | H |
| C2  | 1.0000 | 0.65670 | 0.62435 | 0.31829 | Biso | 1.000 | C |
| C3  | 1.0000 | 0.53050 | 0.44809 | 0.39833 | Biso | 1.000 | C |
| C4  | 1.0000 | 0.55930 | 0.37152 | 0.34794 | Biso | 1.000 | C |
| C5  | 1.0000 | 0.50292 | 0.43414 | 0.48590 | Biso | 1.000 | C |
| C6  | 1.0000 | 0.48879 | 0.33496 | 0.53736 | Biso | 1.000 | C |
| C7  | 1.0000 | 0.48727 | 0.51702 | 0.53344 | Biso | 1.000 | C |
| C8  | 1.0000 | 0.49349 | 0.53031 | 0.62515 | Biso | 1.000 | C |
| C9  | 1.0000 | 0.46795 | 0.59500 | 0.48165 | Biso | 1.000 | C |
| C10 | 1.0000 | 0.42122 | 0.65652 | 0.53200 | Biso | 1.000 | C |
| C11 | 1.0000 | 0.49038 | 0.60769 | 0.39335 | Biso | 1.000 | C |
| C12 | 1.0000 | 0.47792 | 0.69155 | 0.33820 | Biso | 1.000 | C |
| C13 | 1.0000 | 0.53332 | 0.54146 | 0.34433 | Biso | 1.000 | C |
| H5  | 1.0000 | 0.69235 | 0.58274 | 0.28005 | Biso | 1.000 | H |
| H6  | 1.0000 | 0.70649 | 0.65935 | 0.37808 | Biso | 1.000 | H |
| H7  | 1.0000 | 0.66348 | 0.69335 | 0.27871 | Biso | 1.000 | H |
| H8  | 1.0000 | 0.61517 | 0.41411 | 0.29246 | Biso | 1.000 | H |
| H9  | 1.0000 | 0.48440 | 0.30113 | 0.31968 | Biso | 1.000 | H |
| H10 | 1.0000 | 0.60026 | 0.33845 | 0.38918 | Biso | 1.000 | H |
| H11 | 1.0000 | 0.41138 | 0.29671 | 0.57563 | Biso | 1.000 | H |
| H12 | 1.0000 | 0.55750 | 0.35645 | 0.58341 | Biso | 1.000 | H |
| H13 | 1.0000 | 0.48312 | 0.27201 | 0.49237 | Biso | 1.000 | H |
| H14 | 1.0000 | 0.48143 | 0.59710 | 0.64951 | Biso | 1.000 | H |
| H15 | 1.0000 | 0.48282 | 0.72002 | 0.57620 | Biso | 1.000 | H |
| H16 | 1.0000 | 0.35079 | 0.59849 | 0.57334 | Biso | 1.000 | H |
| H17 | 1.0000 | 0.39045 | 0.69634 | 0.48827 | Biso | 1.000 | H |
| H18 | 1.0000 | 0.52748 | 0.71337 | 0.27776 | Biso | 1.000 | H |
| H19 | 1.0000 | 0.50630 | 0.76884 | 0.37461 | Biso | 1.000 | H |
| H20 | 1.0000 | 0.39087 | 0.65851 | 0.31843 | Biso | 1.000 | H |
| C14 | 1.0000 | 0.45990 | 0.48886 | 0.26020 | Biso | 1.000 | C |
| H21 | 1.0000 | 0.49197 | 0.44580 | 0.21995 | Biso | 1.000 | H |
| H22 | 1.0000 | 0.37390 | 0.42877 | 0.27964 | Biso | 1.000 | H |
| H23 | 1.0000 | 0.45834 | 0.55203 | 0.21828 | Biso | 1.000 | H |
| C15 | 1.0000 | 0.69158 | 0.63618 | 0.61097 | Biso | 1.000 | C |
| O73 | 1.0000 | 0.85217 | 0.71130 | 0.62223 | Biso | 1.000 | O |
| H24 | 1.0000 | 0.68194 | 0.64648 | 0.68040 | Biso | 1.000 | H |
| H25 | 1.0000 | 0.68845 | 0.56087 | 0.58832 | Biso | 1.000 | H |
| H26 | 1.0000 | 0.68914 | 0.69257 | 0.56277 | Biso | 1.000 | H |

H27 1.0000 0.87263 0.78751 0.63852 Biso 1.000 H

TS-MS1/C2 in HMB-based pathway

data\_image0

\_cell\_length\_a 13.8042  
 \_cell\_length\_b 13.8042  
 \_cell\_length\_c 15.044  
 \_cell\_angle\_alpha 90  
 \_cell\_angle\_beta 90  
 \_cell\_angle\_gamma 120

\_symmetry\_space\_group\_name\_H-M P 1

\_symmetry\_int\_tables\_number 1

loop\_

\_symmetry\_equiv\_pos\_as\_xyz  
 'x, y, z'

loop\_

\_atom\_site\_label  
 \_atom\_site\_occupancy  
 \_atom\_site\_fract\_x  
 \_atom\_site\_fract\_y  
 \_atom\_site\_fract\_z  
 \_atom\_site\_thermal\_displace\_type  
 \_atom\_site\_B\_iso\_or\_equiv  
 \_atom\_site\_type\_symbol

|     |        |         |         |         |      |       |    |
|-----|--------|---------|---------|---------|------|-------|----|
| P1  | 1.0000 | 0.04660 | 0.17008 | 0.52487 | Biso | 1.000 | P  |
| O1  | 1.0000 | 0.08358 | 0.29514 | 0.51442 | Biso | 1.000 | O  |
| O2  | 1.0000 | 0.27837 | 0.39205 | 0.83343 | Biso | 1.000 | O  |
| O3  | 1.0000 | 0.14090 | 0.49012 | 0.79624 | Biso | 1.000 | O  |
| Al1 | 1.0000 | 0.25559 | 0.27308 | 0.06838 | Biso | 1.000 | Al |
| O4  | 1.0000 | 0.17816 | 0.11665 | 0.28484 | Biso | 1.000 | O  |
| Al2 | 1.0000 | 0.04462 | 0.17081 | 0.73250 | Biso | 1.000 | Al |
| P2  | 1.0000 | 0.15117 | 0.06513 | 0.19021 | Biso | 1.000 | P  |
| Al3 | 1.0000 | 0.15303 | 0.06187 | 0.39589 | Biso | 1.000 | Al |
| O5  | 1.0000 | 0.07121 | 0.14838 | 0.62165 | Biso | 1.000 | O  |
| P3  | 1.0000 | 0.25601 | 0.27262 | 0.85390 | Biso | 1.000 | P  |
| O6  | 1.0000 | 0.35986 | 0.26582 | 0.82562 | Biso | 1.000 | O  |
| O7  | 1.0000 | 0.23891 | 0.03099 | 0.16195 | Biso | 1.000 | O  |
| O8  | 1.0000 | 0.47917 | 0.18942 | 0.13776 | Biso | 1.000 | O  |
| Al4 | 1.0000 | 0.05224 | 0.40203 | 0.52722 | Biso | 1.000 | Al |
| O9  | 1.0000 | 0.15554 | 0.18552 | 0.79960 | Biso | 1.000 | O  |
| P4  | 1.0000 | 0.25848 | 0.49865 | 0.06884 | Biso | 1.000 | P  |
| Al5 | 1.0000 | 0.37691 | 0.06407 | 0.18776 | Biso | 1.000 | Al |

|      |        |         |         |         |      |       |    |
|------|--------|---------|---------|---------|------|-------|----|
| O10  | 1.0000 | 0.23973 | 0.38596 | 0.10520 | Biso | 1.000 | O  |
| O11  | 1.0000 | 0.02666 | 0.28887 | 0.74094 | Biso | 1.000 | O  |
| O12  | 1.0000 | 0.40030 | 0.08588 | 0.30301 | Biso | 1.000 | O  |
| O13  | 1.0000 | 0.11954 | 0.14751 | 0.46069 | Biso | 1.000 | O  |
| O14  | 1.0000 | 0.08075 | 0.45384 | 0.63737 | Biso | 1.000 | O  |
| P5   | 1.0000 | 0.36885 | 0.05499 | 0.40173 | Biso | 1.000 | P  |
| O15  | 1.0000 | 0.29019 | 0.09636 | 0.43468 | Biso | 1.000 | O  |
| O16  | 1.0000 | 0.39512 | 0.30957 | 0.09462 | Biso | 1.000 | O  |
| P6   | 1.0000 | 0.04649 | 0.40946 | 0.73357 | Biso | 1.000 | P  |
| Al6  | 1.0000 | 0.48476 | 0.27638 | 0.86498 | Biso | 1.000 | Al |
| O17  | 1.0000 | 0.15670 | 0.15443 | 0.12501 | Biso | 1.000 | O  |
| Al7  | 1.0000 | 0.93321 | 0.61003 | 0.40347 | Biso | 1.000 | Al |
| P7   | 1.0000 | 0.71766 | 0.50858 | 0.85891 | Biso | 1.000 | P  |
| Al8  | 1.0000 | 0.58196 | 0.93426 | 0.73500 | Biso | 1.000 | Al |
| O18  | 1.0000 | 0.72666 | 0.62158 | 0.83647 | Biso | 1.000 | O  |
| O19  | 1.0000 | 0.95441 | 0.72977 | 0.16172 | Biso | 1.000 | O  |
| O20  | 1.0000 | 0.81550 | 0.82349 | 0.12515 | Biso | 1.000 | O  |
| O21  | 1.0000 | 0.55872 | 0.89042 | 0.62276 | Biso | 1.000 | O  |
| O22  | 1.0000 | 0.85946 | 0.86730 | 0.47386 | Biso | 1.000 | O  |
| O23  | 1.0000 | 0.91709 | 0.59019 | 0.28666 | Biso | 1.000 | O  |
| P8   | 1.0000 | 0.59430 | 0.93926 | 0.52787 | Biso | 1.000 | P  |
| O24  | 1.0000 | 0.68107 | 0.91225 | 0.48848 | Biso | 1.000 | O  |
| O25  | 1.0000 | 0.57487 | 0.70961 | 0.83793 | Biso | 1.000 | O  |
| O26  | 1.0000 | 0.80651 | 0.84472 | 0.78482 | Biso | 1.000 | O  |
| P9   | 1.0000 | 0.92952 | 0.61056 | 0.18563 | Biso | 1.000 | P  |
| Al9  | 1.0000 | 0.48322 | 0.72820 | 0.06267 | Biso | 1.000 | Al |
| Si1  | 1.0000 | 0.92368 | 0.82767 | 0.40573 | Biso | 1.000 | Si |
| O27  | 1.0000 | 0.91030 | 0.71149 | 0.44666 | Biso | 1.000 | O  |
| O28  | 1.0000 | 0.69168 | 0.62087 | 0.07319 | Biso | 1.000 | O  |
| O29  | 1.0000 | 0.48837 | 0.88831 | 0.46927 | Biso | 1.000 | O  |
| Al10 | 1.0000 | 0.71350 | 0.73950 | 0.85776 | Biso | 1.000 | Al |
| O30  | 1.0000 | 0.81259 | 0.93748 | 0.64055 | Biso | 1.000 | O  |
| O31  | 1.0000 | 0.81988 | 0.52124 | 0.14066 | Biso | 1.000 | O  |
| P10  | 1.0000 | 0.81485 | 0.95070 | 0.74176 | Biso | 1.000 | P  |
| Al11 | 1.0000 | 0.91717 | 0.82977 | 0.20054 | Biso | 1.000 | Al |
| Al12 | 1.0000 | 0.82054 | 0.95248 | 0.52331 | Biso | 1.000 | Al |
| O32  | 1.0000 | 0.86464 | 0.80205 | 0.30703 | Biso | 1.000 | O  |
| O33  | 1.0000 | 0.83404 | 0.47962 | 0.44968 | Biso | 1.000 | O  |
| O34  | 1.0000 | 0.47868 | 0.81927 | 0.79373 | Biso | 1.000 | O  |
| P11  | 1.0000 | 0.71775 | 0.74396 | 0.06600 | Biso | 1.000 | P  |
| O35  | 1.0000 | 0.61256 | 0.74735 | 0.09777 | Biso | 1.000 | O  |
| O36  | 1.0000 | 0.71553 | 0.96541 | 0.77266 | Biso | 1.000 | O  |
| O37  | 1.0000 | 0.81509 | 0.42014 | 0.61042 | Biso | 1.000 | O  |
| O38  | 1.0000 | 0.47866 | 0.11067 | 0.45561 | Biso | 1.000 | O  |



|      |        |         |         |         |      |       |    |
|------|--------|---------|---------|---------|------|-------|----|
| O39  | 1.0000 | 0.64844 | 0.06808 | 0.53234 | Biso | 1.000 | O  |
| P12  | 1.0000 | 0.81761 | 0.38557 | 0.51291 | Biso | 1.000 | P  |
| O40  | 1.0000 | 0.70443 | 0.28253 | 0.48774 | Biso | 1.000 | O  |
| O41  | 1.0000 | 0.59178 | 0.41775 | 0.86149 | Biso | 1.000 | O  |
| O42  | 1.0000 | 0.51175 | 0.19146 | 0.79544 | Biso | 1.000 | O  |
| AI13 | 1.0000 | 0.72311 | 0.51207 | 0.06098 | Biso | 1.000 | AI |
| O43  | 1.0000 | 0.91970 | 0.09799 | 0.50424 | Biso | 1.000 | O  |
| AI14 | 1.0000 | 0.81127 | 0.39352 | 0.72525 | Biso | 1.000 | AI |
| O44  | 1.0000 | 0.91147 | 0.35581 | 0.50022 | Biso | 1.000 | O  |
| P13  | 1.0000 | 0.58441 | 0.16500 | 0.73383 | Biso | 1.000 | P  |
| O45  | 1.0000 | 0.56293 | 0.04780 | 0.75833 | Biso | 1.000 | O  |
| AI15 | 1.0000 | 0.59241 | 0.15771 | 0.52795 | Biso | 1.000 | AI |
| O46  | 1.0000 | 0.92400 | 0.05356 | 0.77372 | Biso | 1.000 | O  |
| O47  | 1.0000 | 0.78011 | 0.48203 | 0.78717 | Biso | 1.000 | O  |
| P14  | 1.0000 | 0.48611 | 0.27830 | 0.07191 | Biso | 1.000 | P  |
| O48  | 1.0000 | 0.60123 | 0.38377 | 0.08248 | Biso | 1.000 | O  |
| O49  | 1.0000 | 0.71037 | 0.25131 | 0.74593 | Biso | 1.000 | O  |
| O50  | 1.0000 | 0.93956 | 0.41012 | 0.76150 | Biso | 1.000 | O  |
| O51  | 1.0000 | 0.54836 | 0.16664 | 0.63648 | Biso | 1.000 | O  |
| O52  | 1.0000 | 0.49033 | 0.77966 | 0.95442 | Biso | 1.000 | O  |
| O53  | 1.0000 | 0.77097 | 0.51403 | 0.95119 | Biso | 1.000 | O  |
| O54  | 1.0000 | 0.74649 | 0.78484 | 0.96865 | Biso | 1.000 | O  |
| P15  | 1.0000 | 0.38083 | 0.84567 | 0.19112 | Biso | 1.000 | P  |
| O55  | 1.0000 | 0.40004 | 0.95604 | 0.14921 | Biso | 1.000 | O  |
| AI16 | 1.0000 | 0.37552 | 0.84594 | 0.39557 | Biso | 1.000 | AI |
| P16  | 1.0000 | 0.47882 | 0.73335 | 0.85870 | Biso | 1.000 | P  |
| O56  | 1.0000 | 0.36731 | 0.62437 | 0.84657 | Biso | 1.000 | O  |
| O57  | 1.0000 | 0.25299 | 0.76147 | 0.19456 | Biso | 1.000 | O  |
| O58  | 1.0000 | 0.03370 | 0.96360 | 0.18389 | Biso | 1.000 | O  |
| O59  | 1.0000 | 0.20394 | 0.54346 | 0.13286 | Biso | 1.000 | O  |
| O60  | 1.0000 | 0.14967 | 0.50861 | 0.45748 | Biso | 1.000 | O  |
| O61  | 1.0000 | 0.02606 | 0.59468 | 0.14925 | Biso | 1.000 | O  |
| O62  | 1.0000 | 0.43048 | 0.86806 | 0.28641 | Biso | 1.000 | O  |
| O63  | 1.0000 | 0.13562 | 0.56318 | 0.30219 | Biso | 1.000 | O  |
| O64  | 1.0000 | 0.31021 | 0.92594 | 0.41369 | Biso | 1.000 | O  |
| P17  | 1.0000 | 0.15659 | 0.60436 | 0.39984 | Biso | 1.000 | P  |
| O65  | 1.0000 | 0.27697 | 0.70416 | 0.40942 | Biso | 1.000 | O  |
| O66  | 1.0000 | 0.38664 | 0.58166 | 0.06323 | Biso | 1.000 | O  |
| AI17 | 1.0000 | 0.24673 | 0.49649 | 0.86396 | Biso | 1.000 | AI |
| O67  | 1.0000 | 0.05705 | 0.92165 | 0.39677 | Biso | 1.000 | O  |
| O68  | 1.0000 | 0.44138 | 0.79829 | 0.13605 | Biso | 1.000 | O  |
| O69  | 1.0000 | 0.07109 | 0.63794 | 0.43086 | Biso | 1.000 | O  |
| AI18 | 1.0000 | 0.15301 | 0.61653 | 0.19304 | Biso | 1.000 | AI |
| O70  | 1.0000 | 0.23122 | 0.24716 | 0.95389 | Biso | 1.000 | O  |

|     |        |         |         |         |      |       |   |
|-----|--------|---------|---------|---------|------|-------|---|
| O71 | 1.0000 | 0.46834 | 0.22987 | 0.97639 | Biso | 1.000 | O |
| O72 | 1.0000 | 0.20360 | 0.48164 | 0.97604 | Biso | 1.000 | O |
| H1  | 1.0000 | 0.82612 | 0.67444 | 0.56254 | Biso | 1.000 | H |
| C1  | 1.0000 | 0.50432 | 0.51446 | 0.69169 | Biso | 1.000 | C |
| O73 | 1.0000 | 0.78551 | 0.64682 | 0.61842 | Biso | 1.000 | O |
| H2  | 1.0000 | 0.47888 | 0.49976 | 0.76085 | Biso | 1.000 | H |
| H3  | 1.0000 | 0.56913 | 0.49283 | 0.68065 | Biso | 1.000 | H |
| H4  | 1.0000 | 0.54308 | 0.60373 | 0.67850 | Biso | 1.000 | H |
| H5  | 1.0000 | 0.81904 | 0.71145 | 0.65725 | Biso | 1.000 | H |
| C2  | 1.0000 | 0.35047 | 0.46553 | 0.33446 | Biso | 1.000 | C |
| H6  | 1.0000 | 0.35787 | 0.43417 | 0.27008 | Biso | 1.000 | H |
| H7  | 1.0000 | 0.30481 | 0.40055 | 0.38312 | Biso | 1.000 | H |
| H8  | 1.0000 | 0.31693 | 0.52118 | 0.32589 | Biso | 1.000 | H |
| C3  | 1.0000 | 0.56673 | 0.54698 | 0.26684 | Biso | 1.000 | C |
| C4  | 1.0000 | 0.51306 | 0.42431 | 0.40320 | Biso | 1.000 | C |
| C5  | 1.0000 | 0.55746 | 0.36004 | 0.35384 | Biso | 1.000 | C |
| C6  | 1.0000 | 0.48128 | 0.40746 | 0.49190 | Biso | 1.000 | C |
| C7  | 1.0000 | 0.49409 | 0.32432 | 0.54684 | Biso | 1.000 | C |
| C8  | 1.0000 | 0.43885 | 0.47125 | 0.53441 | Biso | 1.000 | C |
| C9  | 1.0000 | 0.40306 | 0.44770 | 0.63037 | Biso | 1.000 | C |
| C10 | 1.0000 | 0.44002 | 0.56069 | 0.49189 | Biso | 1.000 | C |
| C11 | 1.0000 | 0.40594 | 0.63202 | 0.54345 | Biso | 1.000 | C |
| C12 | 1.0000 | 0.47669 | 0.58349 | 0.40056 | Biso | 1.000 | C |
| C13 | 1.0000 | 0.51663 | 0.69671 | 0.35923 | Biso | 1.000 | C |
| C14 | 1.0000 | 0.50873 | 0.51168 | 0.35550 | Biso | 1.000 | C |
| H9  | 1.0000 | 0.54990 | 0.47529 | 0.22617 | Biso | 1.000 | H |
| H10 | 1.0000 | 0.65693 | 0.59608 | 0.27884 | Biso | 1.000 | H |
| H11 | 1.0000 | 0.54325 | 0.59890 | 0.22908 | Biso | 1.000 | H |
| H12 | 1.0000 | 0.50472 | 0.31731 | 0.29650 | Biso | 1.000 | H |
| H13 | 1.0000 | 0.56113 | 0.29763 | 0.39429 | Biso | 1.000 | H |
| H14 | 1.0000 | 0.64182 | 0.41562 | 0.32859 | Biso | 1.000 | H |
| H15 | 1.0000 | 0.57219 | 0.32875 | 0.52923 | Biso | 1.000 | H |
| H16 | 1.0000 | 0.42480 | 0.23990 | 0.53584 | Biso | 1.000 | H |
| H17 | 1.0000 | 0.49773 | 0.34108 | 0.61730 | Biso | 1.000 | H |
| H18 | 1.0000 | 0.33972 | 0.47064 | 0.64438 | Biso | 1.000 | H |
| H19 | 1.0000 | 0.36401 | 0.35839 | 0.64439 | Biso | 1.000 | H |
| H20 | 1.0000 | 0.40541 | 0.69649 | 0.50400 | Biso | 1.000 | H |
| H21 | 1.0000 | 0.46208 | 0.67205 | 0.59945 | Biso | 1.000 | H |
| H22 | 1.0000 | 0.32184 | 0.58199 | 0.57048 | Biso | 1.000 | H |
| H23 | 1.0000 | 0.47942 | 0.69287 | 0.29468 | Biso | 1.000 | H |
| H24 | 1.0000 | 0.60720 | 0.73780 | 0.34991 | Biso | 1.000 | H |
| H25 | 1.0000 | 0.50105 | 0.74962 | 0.40216 | Biso | 1.000 | H |

TS-MS2/C2 in HMB-based pathway

data\_image0

\_cell\_length\_a 13.8042  
 \_cell\_length\_b 13.8042  
 \_cell\_length\_c 15.044  
 \_cell\_angle\_alpha 90  
 \_cell\_angle\_beta 90  
 \_cell\_angle\_gamma 120

\_symmetry\_space\_group\_name\_H-M P 1  
 \_symmetry\_int\_tables\_number 1

loop\_

\_symmetry\_equiv\_pos\_as\_xyz  
 'x, y, z'

loop\_

\_atom\_site\_label  
 \_atom\_site\_occupancy  
 \_atom\_site\_fract\_x  
 \_atom\_site\_fract\_y  
 \_atom\_site\_fract\_z  
 \_atom\_site\_thermal\_displace\_type  
 \_atom\_site\_B\_iso\_or\_equiv  
 \_atom\_site\_type\_symbol

|     |        |         |         |         |      |       |    |
|-----|--------|---------|---------|---------|------|-------|----|
| P1  | 1.0000 | 0.03693 | 0.17208 | 0.51458 | Biso | 1.000 | P  |
| O1  | 1.0000 | 0.06425 | 0.29088 | 0.48481 | Biso | 1.000 | O  |
| O2  | 1.0000 | 0.28086 | 0.39379 | 0.82379 | Biso | 1.000 | O  |
| O3  | 1.0000 | 0.13604 | 0.48896 | 0.79479 | Biso | 1.000 | O  |
| Al1 | 1.0000 | 0.24701 | 0.26623 | 0.06177 | Biso | 1.000 | Al |
| O4  | 1.0000 | 0.16328 | 0.10940 | 0.28196 | Biso | 1.000 | O  |
| Al2 | 1.0000 | 0.03523 | 0.17565 | 0.73060 | Biso | 1.000 | Al |
| P2  | 1.0000 | 0.14255 | 0.05879 | 0.18703 | Biso | 1.000 | P  |
| Al3 | 1.0000 | 0.14443 | 0.05860 | 0.39443 | Biso | 1.000 | Al |
| O5  | 1.0000 | 0.05932 | 0.17290 | 0.61587 | Biso | 1.000 | O  |
| P3  | 1.0000 | 0.25138 | 0.27213 | 0.84618 | Biso | 1.000 | P  |
| O6  | 1.0000 | 0.35193 | 0.25823 | 0.82071 | Biso | 1.000 | O  |
| O7  | 1.0000 | 0.23227 | 0.02574 | 0.16317 | Biso | 1.000 | O  |
| O8  | 1.0000 | 0.46942 | 0.17928 | 0.12704 | Biso | 1.000 | O  |
| Al4 | 1.0000 | 0.03451 | 0.39182 | 0.52692 | Biso | 1.000 | Al |
| O9  | 1.0000 | 0.15115 | 0.18881 | 0.78978 | Biso | 1.000 | O  |
| P4  | 1.0000 | 0.24897 | 0.49020 | 0.06499 | Biso | 1.000 | P  |
| Al5 | 1.0000 | 0.37098 | 0.05921 | 0.18496 | Biso | 1.000 | Al |

|      |        |         |         |         |      |       |    |
|------|--------|---------|---------|---------|------|-------|----|
| O10  | 1.0000 | 0.23356 | 0.37916 | 0.10207 | Biso | 1.000 | O  |
| O11  | 1.0000 | 0.00575 | 0.28384 | 0.75681 | Biso | 1.000 | O  |
| O12  | 1.0000 | 0.39868 | 0.08543 | 0.29956 | Biso | 1.000 | O  |
| O13  | 1.0000 | 0.11814 | 0.14619 | 0.46426 | Biso | 1.000 | O  |
| O14  | 1.0000 | 0.08681 | 0.43166 | 0.63604 | Biso | 1.000 | O  |
| P5   | 1.0000 | 0.36215 | 0.05200 | 0.39726 | Biso | 1.000 | P  |
| O15  | 1.0000 | 0.28335 | 0.09382 | 0.42850 | Biso | 1.000 | O  |
| O16  | 1.0000 | 0.38644 | 0.30081 | 0.08517 | Biso | 1.000 | O  |
| P6   | 1.0000 | 0.04179 | 0.40691 | 0.73279 | Biso | 1.000 | P  |
| AI6  | 1.0000 | 0.48285 | 0.28216 | 0.85685 | Biso | 1.000 | AI |
| O17  | 1.0000 | 0.15007 | 0.14682 | 0.11938 | Biso | 1.000 | O  |
| AI7  | 1.0000 | 0.92465 | 0.60630 | 0.39329 | Biso | 1.000 | AI |
| P7   | 1.0000 | 0.70871 | 0.50672 | 0.85465 | Biso | 1.000 | P  |
| AI8  | 1.0000 | 0.58275 | 0.94070 | 0.73646 | Biso | 1.000 | AI |
| O18  | 1.0000 | 0.73418 | 0.62823 | 0.84673 | Biso | 1.000 | O  |
| O19  | 1.0000 | 0.95322 | 0.72333 | 0.16427 | Biso | 1.000 | O  |
| O20  | 1.0000 | 0.80774 | 0.81001 | 0.12497 | Biso | 1.000 | O  |
| O21  | 1.0000 | 0.56104 | 0.91109 | 0.62159 | Biso | 1.000 | O  |
| O22  | 1.0000 | 0.84285 | 0.85111 | 0.47496 | Biso | 1.000 | O  |
| O23  | 1.0000 | 0.87249 | 0.57132 | 0.28305 | Biso | 1.000 | O  |
| P8   | 1.0000 | 0.59187 | 0.94403 | 0.52276 | Biso | 1.000 | P  |
| O24  | 1.0000 | 0.67301 | 0.90645 | 0.48839 | Biso | 1.000 | O  |
| O25  | 1.0000 | 0.56938 | 0.70161 | 0.83223 | Biso | 1.000 | O  |
| O26  | 1.0000 | 0.80298 | 0.84255 | 0.78321 | Biso | 1.000 | O  |
| P9   | 1.0000 | 0.91676 | 0.60035 | 0.18677 | Biso | 1.000 | P  |
| AI9  | 1.0000 | 0.47787 | 0.72264 | 0.06197 | Biso | 1.000 | AI |
| Si1  | 1.0000 | 0.91484 | 0.82037 | 0.40716 | Biso | 1.000 | Si |
| O27  | 1.0000 | 0.90543 | 0.70482 | 0.44670 | Biso | 1.000 | O  |
| O28  | 1.0000 | 0.68662 | 0.61477 | 0.05913 | Biso | 1.000 | O  |
| O29  | 1.0000 | 0.48242 | 0.88634 | 0.46832 | Biso | 1.000 | O  |
| AI10 | 1.0000 | 0.71009 | 0.74091 | 0.85850 | Biso | 1.000 | AI |
| O30  | 1.0000 | 0.80798 | 0.93515 | 0.63815 | Biso | 1.000 | O  |
| O31  | 1.0000 | 0.82183 | 0.51860 | 0.12471 | Biso | 1.000 | O  |
| P10  | 1.0000 | 0.81247 | 0.94858 | 0.73948 | Biso | 1.000 | P  |
| AI11 | 1.0000 | 0.91226 | 0.82197 | 0.19988 | Biso | 1.000 | AI |
| AI12 | 1.0000 | 0.81309 | 0.94538 | 0.52047 | Biso | 1.000 | AI |
| O32  | 1.0000 | 0.86091 | 0.79819 | 0.30675 | Biso | 1.000 | O  |
| O33  | 1.0000 | 0.85691 | 0.47456 | 0.44550 | Biso | 1.000 | O  |
| O34  | 1.0000 | 0.48133 | 0.82102 | 0.79235 | Biso | 1.000 | O  |
| P11  | 1.0000 | 0.71050 | 0.73737 | 0.06307 | Biso | 1.000 | P  |
| O35  | 1.0000 | 0.60413 | 0.73509 | 0.09894 | Biso | 1.000 | O  |
| O36  | 1.0000 | 0.71518 | 0.96567 | 0.77188 | Biso | 1.000 | O  |
| O37  | 1.0000 | 0.79351 | 0.42796 | 0.60544 | Biso | 1.000 | O  |
| O38  | 1.0000 | 0.46963 | 0.10553 | 0.45409 | Biso | 1.000 | O  |

|      |        |         |         |         |      |       |    |
|------|--------|---------|---------|---------|------|-------|----|
| O39  | 1.0000 | 0.64974 | 0.07258 | 0.51250 | Biso | 1.000 | O  |
| P12  | 1.0000 | 0.80874 | 0.38233 | 0.51554 | Biso | 1.000 | P  |
| O40  | 1.0000 | 0.69366 | 0.28868 | 0.48243 | Biso | 1.000 | O  |
| O41  | 1.0000 | 0.57974 | 0.42760 | 0.84740 | Biso | 1.000 | O  |
| O42  | 1.0000 | 0.51867 | 0.20525 | 0.78589 | Biso | 1.000 | O  |
| AI13 | 1.0000 | 0.71456 | 0.50313 | 0.05490 | Biso | 1.000 | AI |
| O43  | 1.0000 | 0.91247 | 0.08779 | 0.49368 | Biso | 1.000 | O  |
| AI14 | 1.0000 | 0.80826 | 0.40089 | 0.71824 | Biso | 1.000 | AI |
| O44  | 1.0000 | 0.88785 | 0.33349 | 0.52866 | Biso | 1.000 | O  |
| P13  | 1.0000 | 0.58852 | 0.16859 | 0.73091 | Biso | 1.000 | P  |
| O45  | 1.0000 | 0.56718 | 0.05506 | 0.76713 | Biso | 1.000 | O  |
| AI15 | 1.0000 | 0.58869 | 0.15766 | 0.52114 | Biso | 1.000 | AI |
| O46  | 1.0000 | 0.92362 | 0.04973 | 0.76967 | Biso | 1.000 | O  |
| O47  | 1.0000 | 0.76971 | 0.48404 | 0.77934 | Biso | 1.000 | O  |
| P14  | 1.0000 | 0.48116 | 0.27424 | 0.06602 | Biso | 1.000 | P  |
| O48  | 1.0000 | 0.59350 | 0.37953 | 0.08749 | Biso | 1.000 | O  |
| O49  | 1.0000 | 0.71505 | 0.25577 | 0.73831 | Biso | 1.000 | O  |
| O50  | 1.0000 | 0.94257 | 0.42701 | 0.74476 | Biso | 1.000 | O  |
| O51  | 1.0000 | 0.54908 | 0.15606 | 0.63296 | Biso | 1.000 | O  |
| O52  | 1.0000 | 0.48982 | 0.77310 | 0.95230 | Biso | 1.000 | O  |
| O53  | 1.0000 | 0.75110 | 0.48829 | 0.94493 | Biso | 1.000 | O  |
| O54  | 1.0000 | 0.73802 | 0.78997 | 0.96876 | Biso | 1.000 | O  |
| P15  | 1.0000 | 0.37366 | 0.83751 | 0.18914 | Biso | 1.000 | P  |
| O55  | 1.0000 | 0.39414 | 0.94997 | 0.15115 | Biso | 1.000 | O  |
| AI16 | 1.0000 | 0.36632 | 0.84066 | 0.39768 | Biso | 1.000 | AI |
| P16  | 1.0000 | 0.47684 | 0.73068 | 0.85516 | Biso | 1.000 | P  |
| O56  | 1.0000 | 0.36237 | 0.62566 | 0.84113 | Biso | 1.000 | O  |
| O57  | 1.0000 | 0.24663 | 0.75134 | 0.18390 | Biso | 1.000 | O  |
| O58  | 1.0000 | 0.02604 | 0.95604 | 0.17798 | Biso | 1.000 | O  |
| O59  | 1.0000 | 0.18286 | 0.52786 | 0.12321 | Biso | 1.000 | O  |
| O60  | 1.0000 | 0.10852 | 0.51357 | 0.46393 | Biso | 1.000 | O  |
| O61  | 1.0000 | 0.01595 | 0.58011 | 0.17176 | Biso | 1.000 | O  |
| O62  | 1.0000 | 0.41420 | 0.85143 | 0.28697 | Biso | 1.000 | O  |
| O63  | 1.0000 | 0.16368 | 0.56305 | 0.30381 | Biso | 1.000 | O  |
| O64  | 1.0000 | 0.30220 | 0.92289 | 0.40794 | Biso | 1.000 | O  |
| P17  | 1.0000 | 0.15111 | 0.60846 | 0.39534 | Biso | 1.000 | P  |
| O65  | 1.0000 | 0.26822 | 0.70162 | 0.42661 | Biso | 1.000 | O  |
| O66  | 1.0000 | 0.37581 | 0.57838 | 0.06554 | Biso | 1.000 | O  |
| AI17 | 1.0000 | 0.24528 | 0.49472 | 0.85788 | Biso | 1.000 | AI |
| O67  | 1.0000 | 0.04669 | 0.91933 | 0.40204 | Biso | 1.000 | O  |
| O68  | 1.0000 | 0.44218 | 0.79845 | 0.13476 | Biso | 1.000 | O  |
| O69  | 1.0000 | 0.07173 | 0.65590 | 0.38627 | Biso | 1.000 | O  |
| AI18 | 1.0000 | 0.15036 | 0.60639 | 0.19513 | Biso | 1.000 | AI |
| O70  | 1.0000 | 0.22259 | 0.24703 | 0.94601 | Biso | 1.000 | O  |

|     |        |         |         |         |      |       |   |
|-----|--------|---------|---------|---------|------|-------|---|
| O71 | 1.0000 | 0.47663 | 0.23794 | 0.96783 | Biso | 1.000 | O |
| O72 | 1.0000 | 0.20170 | 0.47261 | 0.96948 | Biso | 1.000 | O |
| H1  | 1.0000 | 0.94574 | 0.71469 | 0.58193 | Biso | 1.000 | H |
| C1  | 1.0000 | 0.65292 | 0.60430 | 0.63064 | Biso | 1.000 | C |
| O73 | 1.0000 | 0.97027 | 0.70470 | 0.64032 | Biso | 1.000 | O |
| H2  | 1.0000 | 0.68888 | 0.63182 | 0.69610 | Biso | 1.000 | H |
| H3  | 1.0000 | 0.69537 | 0.56448 | 0.59939 | Biso | 1.000 | H |
| H4  | 1.0000 | 0.67242 | 0.67814 | 0.59115 | Biso | 1.000 | H |
| H5  | 1.0000 | 0.95267 | 0.74926 | 0.67978 | Biso | 1.000 | H |
| C2  | 1.0000 | 0.32831 | 0.48647 | 0.42734 | Biso | 1.000 | C |
| H6  | 1.0000 | 0.31733 | 0.40333 | 0.42586 | Biso | 1.000 | H |
| H7  | 1.0000 | 0.28345 | 0.49952 | 0.48059 | Biso | 1.000 | H |
| H8  | 1.0000 | 0.30766 | 0.51103 | 0.36479 | Biso | 1.000 | H |
| C3  | 1.0000 | 0.54359 | 0.53233 | 0.25563 | Biso | 1.000 | C |
| C4  | 1.0000 | 0.51832 | 0.42744 | 0.39944 | Biso | 1.000 | C |
| C5  | 1.0000 | 0.55039 | 0.35344 | 0.34915 | Biso | 1.000 | C |
| C6  | 1.0000 | 0.49914 | 0.41726 | 0.49342 | Biso | 1.000 | C |
| C7  | 1.0000 | 0.49338 | 0.32317 | 0.54706 | Biso | 1.000 | C |
| C8  | 1.0000 | 0.48850 | 0.49801 | 0.53991 | Biso | 1.000 | C |
| C9  | 1.0000 | 0.52502 | 0.52232 | 0.63564 | Biso | 1.000 | C |
| C10 | 1.0000 | 0.46616 | 0.57431 | 0.49243 | Biso | 1.000 | C |
| C11 | 1.0000 | 0.44762 | 0.65487 | 0.54702 | Biso | 1.000 | C |
| C12 | 1.0000 | 0.48639 | 0.58604 | 0.39737 | Biso | 1.000 | C |
| C13 | 1.0000 | 0.50300 | 0.68771 | 0.34802 | Biso | 1.000 | C |
| C14 | 1.0000 | 0.51591 | 0.51301 | 0.35275 | Biso | 1.000 | C |
| H9  | 1.0000 | 0.54145 | 0.46108 | 0.22366 | Biso | 1.000 | H |
| H10 | 1.0000 | 0.62741 | 0.60456 | 0.24665 | Biso | 1.000 | H |
| H11 | 1.0000 | 0.48590 | 0.55049 | 0.21969 | Biso | 1.000 | H |
| H12 | 1.0000 | 0.48941 | 0.30706 | 0.29726 | Biso | 1.000 | H |
| H13 | 1.0000 | 0.55782 | 0.29427 | 0.39089 | Biso | 1.000 | H |
| H14 | 1.0000 | 0.63127 | 0.40407 | 0.31655 | Biso | 1.000 | H |
| H15 | 1.0000 | 0.57349 | 0.34647 | 0.57776 | Biso | 1.000 | H |
| H16 | 1.0000 | 0.46642 | 0.24997 | 0.50628 | Biso | 1.000 | H |
| H17 | 1.0000 | 0.43173 | 0.29929 | 0.60011 | Biso | 1.000 | H |
| H18 | 1.0000 | 0.48436 | 0.55980 | 0.67267 | Biso | 1.000 | H |
| H19 | 1.0000 | 0.50859 | 0.44764 | 0.67216 | Biso | 1.000 | H |
| H20 | 1.0000 | 0.41356 | 0.69698 | 0.50898 | Biso | 1.000 | H |
| H21 | 1.0000 | 0.52628 | 0.71698 | 0.57666 | Biso | 1.000 | H |
| H22 | 1.0000 | 0.38907 | 0.61065 | 0.60101 | Biso | 1.000 | H |
| H23 | 1.0000 | 0.44657 | 0.66682 | 0.29164 | Biso | 1.000 | H |
| H24 | 1.0000 | 0.58846 | 0.73120 | 0.32211 | Biso | 1.000 | H |
| H25 | 1.0000 | 0.49507 | 0.74599 | 0.39070 | Biso | 1.000 | H |

TS-MS3/C2 in HMB-based pathway

data\_image0

\_cell\_length\_a 13.8042  
 \_cell\_length\_b 13.8042  
 \_cell\_length\_c 15.044  
 \_cell\_angle\_alpha 90  
 \_cell\_angle\_beta 90  
 \_cell\_angle\_gamma 120

\_symmetry\_space\_group\_name\_H-M P 1

\_symmetry\_int\_tables\_number 1

loop\_

\_symmetry\_equiv\_pos\_as\_xyz  
 'x, y, z'

loop\_

\_atom\_site\_label  
 \_atom\_site\_occupancy  
 \_atom\_site\_fract\_x  
 \_atom\_site\_fract\_y  
 \_atom\_site\_fract\_z  
 \_atom\_site\_thermal\_displace\_type  
 \_atom\_site\_B\_iso\_or\_equiv  
 \_atom\_site\_type\_symbol

|     |        |         |         |         |      |       |    |
|-----|--------|---------|---------|---------|------|-------|----|
| P1  | 1.0000 | 0.03871 | 0.17213 | 0.51407 | Biso | 1.000 | P  |
| O1  | 1.0000 | 0.06224 | 0.28947 | 0.48458 | Biso | 1.000 | O  |
| O2  | 1.0000 | 0.28062 | 0.39316 | 0.82181 | Biso | 1.000 | O  |
| O3  | 1.0000 | 0.13778 | 0.49021 | 0.79142 | Biso | 1.000 | O  |
| Al1 | 1.0000 | 0.24624 | 0.26654 | 0.06113 | Biso | 1.000 | Al |
| O4  | 1.0000 | 0.16379 | 0.10966 | 0.28107 | Biso | 1.000 | O  |
| Al2 | 1.0000 | 0.03592 | 0.17521 | 0.72979 | Biso | 1.000 | Al |
| P2  | 1.0000 | 0.14298 | 0.05890 | 0.18620 | Biso | 1.000 | P  |
| Al3 | 1.0000 | 0.14572 | 0.06051 | 0.39388 | Biso | 1.000 | Al |
| O5  | 1.0000 | 0.06226 | 0.17365 | 0.61532 | Biso | 1.000 | O  |
| P3  | 1.0000 | 0.25155 | 0.27187 | 0.84538 | Biso | 1.000 | P  |
| O6  | 1.0000 | 0.35223 | 0.25792 | 0.82025 | Biso | 1.000 | O  |
| O7  | 1.0000 | 0.23310 | 0.02643 | 0.16232 | Biso | 1.000 | O  |
| O8  | 1.0000 | 0.47017 | 0.18132 | 0.12795 | Biso | 1.000 | O  |
| Al4 | 1.0000 | 0.03256 | 0.39098 | 0.52434 | Biso | 1.000 | Al |
| O9  | 1.0000 | 0.15149 | 0.18791 | 0.78916 | Biso | 1.000 | O  |
| P4  | 1.0000 | 0.24823 | 0.49109 | 0.06311 | Biso | 1.000 | P  |
| Al5 | 1.0000 | 0.37182 | 0.05989 | 0.18445 | Biso | 1.000 | Al |

|      |        |         |         |         |      |       |    |
|------|--------|---------|---------|---------|------|-------|----|
| O10  | 1.0000 | 0.23106 | 0.37906 | 0.09931 | Biso | 1.000 | O  |
| O11  | 1.0000 | 0.00780 | 0.28406 | 0.75653 | Biso | 1.000 | O  |
| O12  | 1.0000 | 0.39995 | 0.08523 | 0.29904 | Biso | 1.000 | O  |
| O13  | 1.0000 | 0.12277 | 0.15062 | 0.46347 | Biso | 1.000 | O  |
| O14  | 1.0000 | 0.08107 | 0.43031 | 0.63440 | Biso | 1.000 | O  |
| P5   | 1.0000 | 0.36279 | 0.05180 | 0.39662 | Biso | 1.000 | P  |
| O15  | 1.0000 | 0.28392 | 0.09368 | 0.42744 | Biso | 1.000 | O  |
| O16  | 1.0000 | 0.38556 | 0.30141 | 0.08518 | Biso | 1.000 | O  |
| P6   | 1.0000 | 0.04088 | 0.40629 | 0.73231 | Biso | 1.000 | P  |
| Al6  | 1.0000 | 0.48286 | 0.28222 | 0.85779 | Biso | 1.000 | Al |
| O17  | 1.0000 | 0.14978 | 0.14660 | 0.11848 | Biso | 1.000 | O  |
| Al7  | 1.0000 | 0.92681 | 0.60746 | 0.39286 | Biso | 1.000 | Al |
| P7   | 1.0000 | 0.70757 | 0.50605 | 0.85513 | Biso | 1.000 | P  |
| Al8  | 1.0000 | 0.58374 | 0.94165 | 0.73572 | Biso | 1.000 | Al |
| O18  | 1.0000 | 0.73399 | 0.62770 | 0.84546 | Biso | 1.000 | O  |
| O19  | 1.0000 | 0.95195 | 0.72340 | 0.16160 | Biso | 1.000 | O  |
| O20  | 1.0000 | 0.80647 | 0.81271 | 0.12728 | Biso | 1.000 | O  |
| O21  | 1.0000 | 0.56339 | 0.91465 | 0.62054 | Biso | 1.000 | O  |
| O22  | 1.0000 | 0.83987 | 0.84699 | 0.47591 | Biso | 1.000 | O  |
| O23  | 1.0000 | 0.87407 | 0.57471 | 0.28276 | Biso | 1.000 | O  |
| P8   | 1.0000 | 0.59427 | 0.94860 | 0.52184 | Biso | 1.000 | P  |
| O24  | 1.0000 | 0.67553 | 0.91167 | 0.48653 | Biso | 1.000 | O  |
| O25  | 1.0000 | 0.57161 | 0.70345 | 0.83249 | Biso | 1.000 | O  |
| O26  | 1.0000 | 0.80338 | 0.84247 | 0.78259 | Biso | 1.000 | O  |
| P9   | 1.0000 | 0.91738 | 0.60137 | 0.18619 | Biso | 1.000 | P  |
| Al9  | 1.0000 | 0.47710 | 0.72261 | 0.06093 | Biso | 1.000 | Al |
| Si1  | 1.0000 | 0.91555 | 0.82056 | 0.40830 | Biso | 1.000 | Si |
| O27  | 1.0000 | 0.91019 | 0.70683 | 0.44762 | Biso | 1.000 | O  |
| O28  | 1.0000 | 0.68940 | 0.61701 | 0.06131 | Biso | 1.000 | O  |
| O29  | 1.0000 | 0.48477 | 0.89137 | 0.46760 | Biso | 1.000 | O  |
| Al10 | 1.0000 | 0.71190 | 0.74149 | 0.85877 | Biso | 1.000 | Al |
| O30  | 1.0000 | 0.80637 | 0.93397 | 0.63741 | Biso | 1.000 | O  |
| O31  | 1.0000 | 0.82241 | 0.51767 | 0.12492 | Biso | 1.000 | O  |
| P10  | 1.0000 | 0.81222 | 0.94804 | 0.73866 | Biso | 1.000 | P  |
| Al11 | 1.0000 | 0.91222 | 0.82219 | 0.19980 | Biso | 1.000 | Al |
| Al12 | 1.0000 | 0.81324 | 0.94429 | 0.51979 | Biso | 1.000 | Al |
| O32  | 1.0000 | 0.86348 | 0.79785 | 0.30734 | Biso | 1.000 | O  |
| O33  | 1.0000 | 0.85270 | 0.47515 | 0.44364 | Biso | 1.000 | O  |
| O34  | 1.0000 | 0.48228 | 0.82131 | 0.79077 | Biso | 1.000 | O  |
| P11  | 1.0000 | 0.71189 | 0.73911 | 0.06353 | Biso | 1.000 | P  |
| O35  | 1.0000 | 0.60408 | 0.73598 | 0.09623 | Biso | 1.000 | O  |
| O36  | 1.0000 | 0.71564 | 0.96580 | 0.77178 | Biso | 1.000 | O  |
| O37  | 1.0000 | 0.80121 | 0.43332 | 0.60583 | Biso | 1.000 | O  |
| O38  | 1.0000 | 0.46993 | 0.10620 | 0.45380 | Biso | 1.000 | O  |



|      |        |         |         |         |      |       |    |
|------|--------|---------|---------|---------|------|-------|----|
| O39  | 1.0000 | 0.65210 | 0.07736 | 0.51296 | Biso | 1.000 | O  |
| P12  | 1.0000 | 0.80813 | 0.38452 | 0.51487 | Biso | 1.000 | P  |
| O40  | 1.0000 | 0.68972 | 0.29249 | 0.48676 | Biso | 1.000 | O  |
| O41  | 1.0000 | 0.57833 | 0.42800 | 0.84864 | Biso | 1.000 | O  |
| O42  | 1.0000 | 0.52101 | 0.20643 | 0.78771 | Biso | 1.000 | O  |
| AI13 | 1.0000 | 0.71509 | 0.50404 | 0.05586 | Biso | 1.000 | AI |
| O43  | 1.0000 | 0.91527 | 0.08542 | 0.49318 | Biso | 1.000 | O  |
| AI14 | 1.0000 | 0.80869 | 0.40082 | 0.71837 | Biso | 1.000 | AI |
| O44  | 1.0000 | 0.88606 | 0.33347 | 0.52253 | Biso | 1.000 | O  |
| P13  | 1.0000 | 0.58791 | 0.16809 | 0.73077 | Biso | 1.000 | P  |
| O45  | 1.0000 | 0.56747 | 0.05519 | 0.76763 | Biso | 1.000 | O  |
| AI15 | 1.0000 | 0.58735 | 0.15897 | 0.52246 | Biso | 1.000 | AI |
| O46  | 1.0000 | 0.92398 | 0.04909 | 0.76778 | Biso | 1.000 | O  |
| O47  | 1.0000 | 0.76662 | 0.48047 | 0.78011 | Biso | 1.000 | O  |
| P14  | 1.0000 | 0.48088 | 0.27556 | 0.06667 | Biso | 1.000 | P  |
| O48  | 1.0000 | 0.59257 | 0.38162 | 0.08797 | Biso | 1.000 | O  |
| O49  | 1.0000 | 0.71486 | 0.25483 | 0.73411 | Biso | 1.000 | O  |
| O50  | 1.0000 | 0.94111 | 0.42444 | 0.74864 | Biso | 1.000 | O  |
| O51  | 1.0000 | 0.54427 | 0.15338 | 0.63391 | Biso | 1.000 | O  |
| O52  | 1.0000 | 0.48608 | 0.77081 | 0.95071 | Biso | 1.000 | O  |
| O53  | 1.0000 | 0.75032 | 0.48856 | 0.94551 | Biso | 1.000 | O  |
| O54  | 1.0000 | 0.74249 | 0.79097 | 0.96892 | Biso | 1.000 | O  |
| P15  | 1.0000 | 0.37479 | 0.83884 | 0.18748 | Biso | 1.000 | P  |
| O55  | 1.0000 | 0.39531 | 0.95134 | 0.14939 | Biso | 1.000 | O  |
| AI16 | 1.0000 | 0.36807 | 0.84107 | 0.39692 | Biso | 1.000 | AI |
| P16  | 1.0000 | 0.47726 | 0.73054 | 0.85335 | Biso | 1.000 | P  |
| O56  | 1.0000 | 0.36449 | 0.62467 | 0.83576 | Biso | 1.000 | O  |
| O57  | 1.0000 | 0.24798 | 0.75229 | 0.18090 | Biso | 1.000 | O  |
| O58  | 1.0000 | 0.02673 | 0.95577 | 0.17757 | Biso | 1.000 | O  |
| O59  | 1.0000 | 0.18043 | 0.52784 | 0.12007 | Biso | 1.000 | O  |
| O60  | 1.0000 | 0.11420 | 0.51118 | 0.46142 | Biso | 1.000 | O  |
| O61  | 1.0000 | 0.01715 | 0.58187 | 0.17238 | Biso | 1.000 | O  |
| O62  | 1.0000 | 0.41401 | 0.85253 | 0.28559 | Biso | 1.000 | O  |
| O63  | 1.0000 | 0.16939 | 0.56621 | 0.30205 | Biso | 1.000 | O  |
| O64  | 1.0000 | 0.30312 | 0.92279 | 0.40757 | Biso | 1.000 | O  |
| P17  | 1.0000 | 0.15498 | 0.60787 | 0.39455 | Biso | 1.000 | P  |
| O65  | 1.0000 | 0.27049 | 0.70237 | 0.42757 | Biso | 1.000 | O  |
| O66  | 1.0000 | 0.37523 | 0.57847 | 0.06593 | Biso | 1.000 | O  |
| AI17 | 1.0000 | 0.24625 | 0.49534 | 0.85520 | Biso | 1.000 | AI |
| O67  | 1.0000 | 0.04603 | 0.92268 | 0.40508 | Biso | 1.000 | O  |
| O68  | 1.0000 | 0.44446 | 0.80080 | 0.13353 | Biso | 1.000 | O  |
| O69  | 1.0000 | 0.07279 | 0.65233 | 0.38726 | Biso | 1.000 | O  |
| AI18 | 1.0000 | 0.15185 | 0.60759 | 0.19395 | Biso | 1.000 | AI |
| O70  | 1.0000 | 0.22279 | 0.24786 | 0.94516 | Biso | 1.000 | O  |

|     |        |         |         |         |      |       |   |
|-----|--------|---------|---------|---------|------|-------|---|
| O71 | 1.0000 | 0.47620 | 0.23818 | 0.96873 | Biso | 1.000 | O |
| O72 | 1.0000 | 0.20392 | 0.47626 | 0.96676 | Biso | 1.000 | O |
| H1  | 1.0000 | 0.94297 | 0.71222 | 0.58366 | Biso | 1.000 | H |
| C1  | 1.0000 | 0.65493 | 0.59586 | 0.62565 | Biso | 1.000 | C |
| O73 | 1.0000 | 0.96127 | 0.70018 | 0.64381 | Biso | 1.000 | O |
| H2  | 1.0000 | 0.69592 | 0.62132 | 0.68971 | Biso | 1.000 | H |
| H3  | 1.0000 | 0.69107 | 0.55229 | 0.59071 | Biso | 1.000 | H |
| H4  | 1.0000 | 0.67587 | 0.67111 | 0.58766 | Biso | 1.000 | H |
| H5  | 1.0000 | 0.96093 | 0.75908 | 0.67861 | Biso | 1.000 | H |
| C2  | 1.0000 | 0.32572 | 0.44913 | 0.52184 | Biso | 1.000 | C |
| H6  | 1.0000 | 0.30362 | 0.39418 | 0.46496 | Biso | 1.000 | H |
| H7  | 1.0000 | 0.30841 | 0.40416 | 0.58471 | Biso | 1.000 | H |
| H8  | 1.0000 | 0.28609 | 0.49991 | 0.52233 | Biso | 1.000 | H |
| C3  | 1.0000 | 0.53576 | 0.53337 | 0.25943 | Biso | 1.000 | C |
| C4  | 1.0000 | 0.51439 | 0.42708 | 0.40324 | Biso | 1.000 | C |
| C5  | 1.0000 | 0.54351 | 0.35366 | 0.34933 | Biso | 1.000 | C |
| C6  | 1.0000 | 0.49508 | 0.41403 | 0.49387 | Biso | 1.000 | C |
| C7  | 1.0000 | 0.48176 | 0.31740 | 0.54804 | Biso | 1.000 | C |
| C8  | 1.0000 | 0.48380 | 0.49700 | 0.54279 | Biso | 1.000 | C |
| C9  | 1.0000 | 0.52679 | 0.52033 | 0.63696 | Biso | 1.000 | C |
| C10 | 1.0000 | 0.46568 | 0.57712 | 0.49654 | Biso | 1.000 | C |
| C11 | 1.0000 | 0.46291 | 0.66779 | 0.55009 | Biso | 1.000 | C |
| C12 | 1.0000 | 0.48591 | 0.58907 | 0.40156 | Biso | 1.000 | C |
| C13 | 1.0000 | 0.48733 | 0.68308 | 0.35090 | Biso | 1.000 | C |
| C14 | 1.0000 | 0.51104 | 0.51673 | 0.35743 | Biso | 1.000 | C |
| H9  | 1.0000 | 0.53227 | 0.46151 | 0.22746 | Biso | 1.000 | H |
| H10 | 1.0000 | 0.61965 | 0.60507 | 0.24917 | Biso | 1.000 | H |
| H11 | 1.0000 | 0.47729 | 0.55151 | 0.22491 | Biso | 1.000 | H |
| H12 | 1.0000 | 0.48013 | 0.30803 | 0.29873 | Biso | 1.000 | H |
| H13 | 1.0000 | 0.55312 | 0.29425 | 0.38917 | Biso | 1.000 | H |
| H14 | 1.0000 | 0.62274 | 0.40489 | 0.31455 | Biso | 1.000 | H |
| H15 | 1.0000 | 0.55650 | 0.33856 | 0.58668 | Biso | 1.000 | H |
| H16 | 1.0000 | 0.46062 | 0.24607 | 0.50657 | Biso | 1.000 | H |
| H17 | 1.0000 | 0.41289 | 0.29111 | 0.59542 | Biso | 1.000 | H |
| H18 | 1.0000 | 0.49342 | 0.56331 | 0.67592 | Biso | 1.000 | H |
| H19 | 1.0000 | 0.50726 | 0.44456 | 0.67315 | Biso | 1.000 | H |
| H20 | 1.0000 | 0.41412 | 0.69873 | 0.51731 | Biso | 1.000 | H |
| H21 | 1.0000 | 0.54771 | 0.73616 | 0.55950 | Biso | 1.000 | H |
| H22 | 1.0000 | 0.42593 | 0.63852 | 0.61536 | Biso | 1.000 | H |
| H23 | 1.0000 | 0.41159 | 0.65336 | 0.31085 | Biso | 1.000 | H |
| H24 | 1.0000 | 0.55859 | 0.72124 | 0.30566 | Biso | 1.000 | H |
| H25 | 1.0000 | 0.49562 | 0.74878 | 0.39452 | Biso | 1.000 | H |

TS9-10/C2 in HMB-based pathway

data\_image0

\_cell\_length\_a 13.8042  
 \_cell\_length\_b 13.8042  
 \_cell\_length\_c 15.044  
 \_cell\_angle\_alpha 90  
 \_cell\_angle\_beta 90  
 \_cell\_angle\_gamma 120

\_symmetry\_space\_group\_name\_H-M P 1

\_symmetry\_int\_tables\_number 1

loop\_

\_symmetry\_equiv\_pos\_as\_xyz  
 'x, y, z'

loop\_

\_atom\_site\_label  
 \_atom\_site\_occupancy  
 \_atom\_site\_fract\_x  
 \_atom\_site\_fract\_y  
 \_atom\_site\_fract\_z  
 \_atom\_site\_thermal\_displace\_type  
 \_atom\_site\_B\_iso\_or\_equiv  
 \_atom\_site\_type\_symbol

|     |        |         |         |         |      |       |    |
|-----|--------|---------|---------|---------|------|-------|----|
| P1  | 1.0000 | 0.04366 | 0.16687 | 0.52052 | Biso | 1.000 | P  |
| O1  | 1.0000 | 0.07160 | 0.28930 | 0.51638 | Biso | 1.000 | O  |
| O2  | 1.0000 | 0.28098 | 0.39035 | 0.83858 | Biso | 1.000 | O  |
| O3  | 1.0000 | 0.13971 | 0.48240 | 0.79113 | Biso | 1.000 | O  |
| Al1 | 1.0000 | 0.25051 | 0.26662 | 0.06384 | Biso | 1.000 | Al |
| O4  | 1.0000 | 0.18028 | 0.11755 | 0.28048 | Biso | 1.000 | O  |
| Al2 | 1.0000 | 0.04320 | 0.16839 | 0.72685 | Biso | 1.000 | Al |
| P2  | 1.0000 | 0.15018 | 0.06223 | 0.18732 | Biso | 1.000 | P  |
| Al3 | 1.0000 | 0.15533 | 0.06718 | 0.39223 | Biso | 1.000 | Al |
| O5  | 1.0000 | 0.06553 | 0.13994 | 0.61660 | Biso | 1.000 | O  |
| P3  | 1.0000 | 0.25427 | 0.26828 | 0.85197 | Biso | 1.000 | P  |
| O6  | 1.0000 | 0.35751 | 0.26044 | 0.82341 | Biso | 1.000 | O  |
| O7  | 1.0000 | 0.23759 | 0.02803 | 0.15839 | Biso | 1.000 | O  |
| O8  | 1.0000 | 0.47610 | 0.18574 | 0.13355 | Biso | 1.000 | O  |
| Al4 | 1.0000 | 0.04388 | 0.39853 | 0.52448 | Biso | 1.000 | Al |
| O9  | 1.0000 | 0.15647 | 0.18763 | 0.79220 | Biso | 1.000 | O  |
| P4  | 1.0000 | 0.25425 | 0.49455 | 0.06548 | Biso | 1.000 | P  |
| Al5 | 1.0000 | 0.37555 | 0.06101 | 0.18511 | Biso | 1.000 | Al |

|      |        |         |         |         |      |       |    |
|------|--------|---------|---------|---------|------|-------|----|
| O10  | 1.0000 | 0.23292 | 0.37925 | 0.09646 | Biso | 1.000 | O  |
| O11  | 1.0000 | 0.02057 | 0.28350 | 0.73309 | Biso | 1.000 | O  |
| O12  | 1.0000 | 0.39990 | 0.08265 | 0.30015 | Biso | 1.000 | O  |
| O13  | 1.0000 | 0.12324 | 0.15443 | 0.45644 | Biso | 1.000 | O  |
| O14  | 1.0000 | 0.06952 | 0.45138 | 0.63457 | Biso | 1.000 | O  |
| P5   | 1.0000 | 0.36729 | 0.05071 | 0.39855 | Biso | 1.000 | P  |
| O15  | 1.0000 | 0.28780 | 0.09096 | 0.43159 | Biso | 1.000 | O  |
| O16  | 1.0000 | 0.39042 | 0.30407 | 0.08795 | Biso | 1.000 | O  |
| P6   | 1.0000 | 0.04154 | 0.40474 | 0.73048 | Biso | 1.000 | P  |
| AI6  | 1.0000 | 0.48532 | 0.27820 | 0.86170 | Biso | 1.000 | AI |
| O17  | 1.0000 | 0.15161 | 0.14790 | 0.12051 | Biso | 1.000 | O  |
| AI7  | 1.0000 | 0.93493 | 0.60906 | 0.39976 | Biso | 1.000 | AI |
| P7   | 1.0000 | 0.71326 | 0.50617 | 0.85584 | Biso | 1.000 | P  |
| AI8  | 1.0000 | 0.58369 | 0.93597 | 0.73584 | Biso | 1.000 | AI |
| O18  | 1.0000 | 0.73242 | 0.62364 | 0.83458 | Biso | 1.000 | O  |
| O19  | 1.0000 | 0.95368 | 0.72685 | 0.15747 | Biso | 1.000 | O  |
| O20  | 1.0000 | 0.81474 | 0.82140 | 0.12312 | Biso | 1.000 | O  |
| O21  | 1.0000 | 0.56277 | 0.90303 | 0.62182 | Biso | 1.000 | O  |
| O22  | 1.0000 | 0.85271 | 0.85658 | 0.47317 | Biso | 1.000 | O  |
| O23  | 1.0000 | 0.91655 | 0.58978 | 0.28391 | Biso | 1.000 | O  |
| P8   | 1.0000 | 0.59606 | 0.94431 | 0.52486 | Biso | 1.000 | P  |
| O24  | 1.0000 | 0.67910 | 0.91030 | 0.48813 | Biso | 1.000 | O  |
| O25  | 1.0000 | 0.57242 | 0.70066 | 0.82970 | Biso | 1.000 | O  |
| O26  | 1.0000 | 0.80685 | 0.84128 | 0.78302 | Biso | 1.000 | O  |
| P9   | 1.0000 | 0.92928 | 0.60806 | 0.18240 | Biso | 1.000 | P  |
| AI9  | 1.0000 | 0.48114 | 0.72216 | 0.06165 | Biso | 1.000 | AI |
| Si1  | 1.0000 | 0.92527 | 0.82803 | 0.40358 | Biso | 1.000 | Si |
| O27  | 1.0000 | 0.92413 | 0.71729 | 0.44762 | Biso | 1.000 | O  |
| O28  | 1.0000 | 0.69264 | 0.61925 | 0.07015 | Biso | 1.000 | O  |
| O29  | 1.0000 | 0.48812 | 0.89163 | 0.46904 | Biso | 1.000 | O  |
| AI10 | 1.0000 | 0.71217 | 0.73739 | 0.85659 | Biso | 1.000 | AI |
| O30  | 1.0000 | 0.81374 | 0.93064 | 0.63772 | Biso | 1.000 | O  |
| O31  | 1.0000 | 0.82032 | 0.51810 | 0.13720 | Biso | 1.000 | O  |
| P10  | 1.0000 | 0.81575 | 0.94713 | 0.73901 | Biso | 1.000 | P  |
| AI11 | 1.0000 | 0.91612 | 0.82575 | 0.19794 | Biso | 1.000 | AI |
| AI12 | 1.0000 | 0.81812 | 0.94767 | 0.51982 | Biso | 1.000 | AI |
| O32  | 1.0000 | 0.86629 | 0.79521 | 0.30560 | Biso | 1.000 | O  |
| O33  | 1.0000 | 0.82942 | 0.48160 | 0.44704 | Biso | 1.000 | O  |
| O34  | 1.0000 | 0.48169 | 0.81771 | 0.79220 | Biso | 1.000 | O  |
| P11  | 1.0000 | 0.71566 | 0.74121 | 0.06506 | Biso | 1.000 | P  |
| O35  | 1.0000 | 0.61013 | 0.74194 | 0.09871 | Biso | 1.000 | O  |
| O36  | 1.0000 | 0.71744 | 0.96301 | 0.76968 | Biso | 1.000 | O  |
| O37  | 1.0000 | 0.82646 | 0.43739 | 0.60989 | Biso | 1.000 | O  |
| O38  | 1.0000 | 0.47628 | 0.10688 | 0.45345 | Biso | 1.000 | O  |

|      |        |         |         |         |      |       |    |
|------|--------|---------|---------|---------|------|-------|----|
| O39  | 1.0000 | 0.65375 | 0.07377 | 0.52188 | Biso | 1.000 | O  |
| P12  | 1.0000 | 0.81459 | 0.39081 | 0.51377 | Biso | 1.000 | P  |
| O40  | 1.0000 | 0.69546 | 0.29121 | 0.50024 | Biso | 1.000 | O  |
| O41  | 1.0000 | 0.58514 | 0.42274 | 0.85295 | Biso | 1.000 | O  |
| O42  | 1.0000 | 0.52038 | 0.19915 | 0.79245 | Biso | 1.000 | O  |
| AI13 | 1.0000 | 0.72026 | 0.50804 | 0.06033 | Biso | 1.000 | AI |
| O43  | 1.0000 | 0.91846 | 0.08989 | 0.49595 | Biso | 1.000 | O  |
| AI14 | 1.0000 | 0.81202 | 0.39344 | 0.72228 | Biso | 1.000 | AI |
| O44  | 1.0000 | 0.90265 | 0.35404 | 0.49701 | Biso | 1.000 | O  |
| P13  | 1.0000 | 0.58399 | 0.16162 | 0.73089 | Biso | 1.000 | P  |
| O45  | 1.0000 | 0.56843 | 0.05018 | 0.76682 | Biso | 1.000 | O  |
| AI15 | 1.0000 | 0.58859 | 0.15590 | 0.52690 | Biso | 1.000 | AI |
| O46  | 1.0000 | 0.92533 | 0.04972 | 0.77005 | Biso | 1.000 | O  |
| O47  | 1.0000 | 0.77321 | 0.47671 | 0.78352 | Biso | 1.000 | O  |
| P14  | 1.0000 | 0.48471 | 0.27666 | 0.06945 | Biso | 1.000 | P  |
| O48  | 1.0000 | 0.59764 | 0.38310 | 0.08552 | Biso | 1.000 | O  |
| O49  | 1.0000 | 0.71070 | 0.24949 | 0.72899 | Biso | 1.000 | O  |
| O50  | 1.0000 | 0.93637 | 0.40569 | 0.76438 | Biso | 1.000 | O  |
| O51  | 1.0000 | 0.53494 | 0.14553 | 0.63584 | Biso | 1.000 | O  |
| O52  | 1.0000 | 0.49320 | 0.77075 | 0.95121 | Biso | 1.000 | O  |
| O53  | 1.0000 | 0.76107 | 0.50341 | 0.94851 | Biso | 1.000 | O  |
| O54  | 1.0000 | 0.74144 | 0.78319 | 0.96735 | Biso | 1.000 | O  |
| P15  | 1.0000 | 0.37967 | 0.84188 | 0.18861 | Biso | 1.000 | P  |
| O55  | 1.0000 | 0.39905 | 0.95287 | 0.14787 | Biso | 1.000 | O  |
| AI16 | 1.0000 | 0.37524 | 0.84120 | 0.39394 | Biso | 1.000 | AI |
| P16  | 1.0000 | 0.47873 | 0.72767 | 0.85439 | Biso | 1.000 | P  |
| O56  | 1.0000 | 0.36499 | 0.62192 | 0.84023 | Biso | 1.000 | O  |
| O57  | 1.0000 | 0.25176 | 0.75778 | 0.19112 | Biso | 1.000 | O  |
| O58  | 1.0000 | 0.03293 | 0.95969 | 0.18503 | Biso | 1.000 | O  |
| O59  | 1.0000 | 0.19906 | 0.53617 | 0.13163 | Biso | 1.000 | O  |
| O60  | 1.0000 | 0.14559 | 0.50226 | 0.45580 | Biso | 1.000 | O  |
| O61  | 1.0000 | 0.02595 | 0.59192 | 0.14772 | Biso | 1.000 | O  |
| O62  | 1.0000 | 0.42847 | 0.86204 | 0.28409 | Biso | 1.000 | O  |
| O63  | 1.0000 | 0.13576 | 0.56265 | 0.30134 | Biso | 1.000 | O  |
| O64  | 1.0000 | 0.30925 | 0.92160 | 0.40951 | Biso | 1.000 | O  |
| P17  | 1.0000 | 0.15628 | 0.60048 | 0.39951 | Biso | 1.000 | P  |
| O65  | 1.0000 | 0.27529 | 0.70067 | 0.41250 | Biso | 1.000 | O  |
| O66  | 1.0000 | 0.38256 | 0.57662 | 0.06153 | Biso | 1.000 | O  |
| AI17 | 1.0000 | 0.24557 | 0.49389 | 0.86155 | Biso | 1.000 | AI |
| O67  | 1.0000 | 0.05496 | 0.92832 | 0.39715 | Biso | 1.000 | O  |
| O68  | 1.0000 | 0.43996 | 0.79614 | 0.13127 | Biso | 1.000 | O  |
| O69  | 1.0000 | 0.06897 | 0.63202 | 0.43099 | Biso | 1.000 | O  |
| AI18 | 1.0000 | 0.15272 | 0.61291 | 0.19167 | Biso | 1.000 | AI |
| O70  | 1.0000 | 0.22343 | 0.23355 | 0.94991 | Biso | 1.000 | O  |

|     |        |         |         |         |      |       |   |
|-----|--------|---------|---------|---------|------|-------|---|
| O71 | 1.0000 | 0.47598 | 0.23362 | 0.97267 | Biso | 1.000 | O |
| O72 | 1.0000 | 0.20120 | 0.48475 | 0.97255 | Biso | 1.000 | O |
| H1  | 1.0000 | 0.92082 | 0.72522 | 0.55992 | Biso | 1.000 | H |
| C1  | 1.0000 | 0.69020 | 0.60220 | 0.55472 | Biso | 1.000 | C |
| O73 | 1.0000 | 0.89253 | 0.71328 | 0.62310 | Biso | 1.000 | O |
| H2  | 1.0000 | 0.78301 | 0.65679 | 0.60228 | Biso | 1.000 | H |
| H3  | 1.0000 | 0.70218 | 0.53457 | 0.53171 | Biso | 1.000 | H |
| H4  | 1.0000 | 0.70578 | 0.66654 | 0.50625 | Biso | 1.000 | H |
| H5  | 1.0000 | 0.90647 | 0.78578 | 0.64454 | Biso | 1.000 | H |
| C2  | 1.0000 | 0.34242 | 0.42142 | 0.63045 | Biso | 1.000 | C |
| H6  | 1.0000 | 0.30730 | 0.33221 | 0.64128 | Biso | 1.000 | H |
| H7  | 1.0000 | 0.39121 | 0.46471 | 0.68940 | Biso | 1.000 | H |
| H8  | 1.0000 | 0.27312 | 0.43783 | 0.62765 | Biso | 1.000 | H |
| C3  | 1.0000 | 0.53945 | 0.53379 | 0.27879 | Biso | 1.000 | C |
| C4  | 1.0000 | 0.49204 | 0.41729 | 0.41867 | Biso | 1.000 | C |
| C5  | 1.0000 | 0.53484 | 0.35051 | 0.37053 | Biso | 1.000 | C |
| C6  | 1.0000 | 0.44830 | 0.39255 | 0.50529 | Biso | 1.000 | C |
| C7  | 1.0000 | 0.45258 | 0.30413 | 0.56096 | Biso | 1.000 | C |
| C8  | 1.0000 | 0.40913 | 0.45892 | 0.54518 | Biso | 1.000 | C |
| C9  | 1.0000 | 0.61291 | 0.58054 | 0.62023 | Biso | 1.000 | C |
| C10 | 1.0000 | 0.42684 | 0.55857 | 0.50376 | Biso | 1.000 | C |
| C11 | 1.0000 | 0.39707 | 0.63234 | 0.55745 | Biso | 1.000 | C |
| C12 | 1.0000 | 0.47288 | 0.58402 | 0.41778 | Biso | 1.000 | C |
| C13 | 1.0000 | 0.49777 | 0.68812 | 0.36776 | Biso | 1.000 | C |
| C14 | 1.0000 | 0.49881 | 0.50982 | 0.37383 | Biso | 1.000 | C |
| H9  | 1.0000 | 0.52881 | 0.45981 | 0.24467 | Biso | 1.000 | H |
| H10 | 1.0000 | 0.62845 | 0.59742 | 0.27557 | Biso | 1.000 | H |
| H11 | 1.0000 | 0.49469 | 0.56608 | 0.24051 | Biso | 1.000 | H |
| H12 | 1.0000 | 0.48181 | 0.30683 | 0.31354 | Biso | 1.000 | H |
| H13 | 1.0000 | 0.53724 | 0.28847 | 0.41218 | Biso | 1.000 | H |
| H14 | 1.0000 | 0.61944 | 0.40438 | 0.34499 | Biso | 1.000 | H |
| H15 | 1.0000 | 0.53161 | 0.30721 | 0.54892 | Biso | 1.000 | H |
| H16 | 1.0000 | 0.38496 | 0.21963 | 0.54719 | Biso | 1.000 | H |
| H17 | 1.0000 | 0.44998 | 0.31876 | 0.63176 | Biso | 1.000 | H |
| H18 | 1.0000 | 0.58986 | 0.64208 | 0.63893 | Biso | 1.000 | H |
| H19 | 1.0000 | 0.58527 | 0.50967 | 0.66448 | Biso | 1.000 | H |
| H20 | 1.0000 | 0.42657 | 0.71340 | 0.52802 | Biso | 1.000 | H |
| H21 | 1.0000 | 0.43198 | 0.64578 | 0.62448 | Biso | 1.000 | H |
| H22 | 1.0000 | 0.30684 | 0.59453 | 0.56563 | Biso | 1.000 | H |
| H23 | 1.0000 | 0.43746 | 0.66924 | 0.31409 | Biso | 1.000 | H |
| H24 | 1.0000 | 0.58066 | 0.72746 | 0.33728 | Biso | 1.000 | H |
| H25 | 1.0000 | 0.49674 | 0.74968 | 0.41091 | Biso | 1.000 | H |

TS-MS1/C3 in HMB-based pathway

data\_image0

\_cell\_length\_a 13.8042  
 \_cell\_length\_b 13.8042  
 \_cell\_length\_c 15.044  
 \_cell\_angle\_alpha 90  
 \_cell\_angle\_beta 90  
 \_cell\_angle\_gamma 120

\_symmetry\_space\_group\_name\_H-M P 1

\_symmetry\_int\_tables\_number 1

loop\_

\_symmetry\_equiv\_pos\_as\_xyz  
 'x, y, z'

loop\_

\_atom\_site\_label  
 \_atom\_site\_occupancy  
 \_atom\_site\_fract\_x  
 \_atom\_site\_fract\_y  
 \_atom\_site\_fract\_z  
 \_atom\_site\_thermal\_displace\_type  
 \_atom\_site\_B\_iso\_or\_equiv  
 \_atom\_site\_type\_symbol

|     |        |         |         |         |      |       |    |
|-----|--------|---------|---------|---------|------|-------|----|
| P1  | 1.0000 | 0.04563 | 0.18381 | 0.52557 | Biso | 1.000 | P  |
| O1  | 1.0000 | 0.08130 | 0.30784 | 0.51008 | Biso | 1.000 | O  |
| O2  | 1.0000 | 0.28501 | 0.40281 | 0.86572 | Biso | 1.000 | O  |
| O3  | 1.0000 | 0.13393 | 0.48331 | 0.80860 | Biso | 1.000 | O  |
| Al1 | 1.0000 | 0.25222 | 0.28039 | 0.06677 | Biso | 1.000 | Al |
| O4  | 1.0000 | 0.17831 | 0.12761 | 0.29483 | Biso | 1.000 | O  |
| Al2 | 1.0000 | 0.04051 | 0.18342 | 0.73569 | Biso | 1.000 | Al |
| P2  | 1.0000 | 0.14866 | 0.08509 | 0.19814 | Biso | 1.000 | P  |
| Al3 | 1.0000 | 0.15274 | 0.07105 | 0.40484 | Biso | 1.000 | Al |
| O5  | 1.0000 | 0.06529 | 0.16472 | 0.62415 | Biso | 1.000 | O  |
| P3  | 1.0000 | 0.25275 | 0.27788 | 0.86454 | Biso | 1.000 | P  |
| O6  | 1.0000 | 0.35616 | 0.26914 | 0.83875 | Biso | 1.000 | O  |
| O7  | 1.0000 | 0.23486 | 0.05257 | 0.16223 | Biso | 1.000 | O  |
| O8  | 1.0000 | 0.47651 | 0.20141 | 0.14180 | Biso | 1.000 | O  |
| Al4 | 1.0000 | 0.05577 | 0.41712 | 0.53338 | Biso | 1.000 | Al |
| O9  | 1.0000 | 0.16144 | 0.21284 | 0.79516 | Biso | 1.000 | O  |
| P4  | 1.0000 | 0.25739 | 0.51804 | 0.07539 | Biso | 1.000 | P  |
| Al5 | 1.0000 | 0.36949 | 0.07750 | 0.19089 | Biso | 1.000 | Al |

|      |        |         |         |         |      |       |    |
|------|--------|---------|---------|---------|------|-------|----|
| O10  | 1.0000 | 0.24639 | 0.40250 | 0.08487 | Biso | 1.000 | O  |
| O11  | 1.0000 | 0.00579 | 0.29045 | 0.74391 | Biso | 1.000 | O  |
| O12  | 1.0000 | 0.39440 | 0.10087 | 0.30568 | Biso | 1.000 | O  |
| O13  | 1.0000 | 0.12321 | 0.16045 | 0.46780 | Biso | 1.000 | O  |
| O14  | 1.0000 | 0.09224 | 0.46278 | 0.64492 | Biso | 1.000 | O  |
| P5   | 1.0000 | 0.36834 | 0.06653 | 0.40443 | Biso | 1.000 | P  |
| O15  | 1.0000 | 0.28956 | 0.10426 | 0.44371 | Biso | 1.000 | O  |
| O16  | 1.0000 | 0.39410 | 0.31873 | 0.08580 | Biso | 1.000 | O  |
| P6   | 1.0000 | 0.04364 | 0.41672 | 0.73852 | Biso | 1.000 | P  |
| AI6  | 1.0000 | 0.48853 | 0.29136 | 0.86934 | Biso | 1.000 | AI |
| O17  | 1.0000 | 0.15668 | 0.18231 | 0.14128 | Biso | 1.000 | O  |
| AI7  | 1.0000 | 0.93517 | 0.62481 | 0.40592 | Biso | 1.000 | AI |
| P7   | 1.0000 | 0.71624 | 0.51862 | 0.86511 | Biso | 1.000 | P  |
| AI8  | 1.0000 | 0.58650 | 0.95031 | 0.74000 | Biso | 1.000 | AI |
| O18  | 1.0000 | 0.73791 | 0.63824 | 0.85064 | Biso | 1.000 | O  |
| O19  | 1.0000 | 0.95957 | 0.75304 | 0.16673 | Biso | 1.000 | O  |
| O20  | 1.0000 | 0.81373 | 0.83570 | 0.12782 | Biso | 1.000 | O  |
| O21  | 1.0000 | 0.56248 | 0.90946 | 0.62671 | Biso | 1.000 | O  |
| O22  | 1.0000 | 0.85484 | 0.87441 | 0.48139 | Biso | 1.000 | O  |
| O23  | 1.0000 | 0.92163 | 0.61016 | 0.28904 | Biso | 1.000 | O  |
| P8   | 1.0000 | 0.59503 | 0.95303 | 0.52995 | Biso | 1.000 | P  |
| O24  | 1.0000 | 0.68051 | 0.92357 | 0.49140 | Biso | 1.000 | O  |
| O25  | 1.0000 | 0.57593 | 0.71426 | 0.83566 | Biso | 1.000 | O  |
| O26  | 1.0000 | 0.80536 | 0.85288 | 0.78263 | Biso | 1.000 | O  |
| P9   | 1.0000 | 0.93495 | 0.63348 | 0.18858 | Biso | 1.000 | P  |
| AI9  | 1.0000 | 0.48252 | 0.74386 | 0.06751 | Biso | 1.000 | AI |
| Si1  | 1.0000 | 0.91988 | 0.83794 | 0.41124 | Biso | 1.000 | Si |
| O27  | 1.0000 | 0.90561 | 0.72081 | 0.45062 | Biso | 1.000 | O  |
| O28  | 1.0000 | 0.69672 | 0.63686 | 0.06524 | Biso | 1.000 | O  |
| O29  | 1.0000 | 0.48809 | 0.89861 | 0.47236 | Biso | 1.000 | O  |
| AI10 | 1.0000 | 0.71641 | 0.75281 | 0.86068 | Biso | 1.000 | AI |
| O30  | 1.0000 | 0.81529 | 0.95799 | 0.64354 | Biso | 1.000 | O  |
| O31  | 1.0000 | 0.82534 | 0.54436 | 0.14326 | Biso | 1.000 | O  |
| P10  | 1.0000 | 0.81728 | 0.96313 | 0.74523 | Biso | 1.000 | P  |
| AI11 | 1.0000 | 0.91670 | 0.84877 | 0.20530 | Biso | 1.000 | AI |
| AI12 | 1.0000 | 0.82053 | 0.96575 | 0.52584 | Biso | 1.000 | AI |
| O32  | 1.0000 | 0.86294 | 0.81799 | 0.31167 | Biso | 1.000 | O  |
| O33  | 1.0000 | 0.83999 | 0.48963 | 0.44651 | Biso | 1.000 | O  |
| O34  | 1.0000 | 0.48624 | 0.83383 | 0.79946 | Biso | 1.000 | O  |
| P11  | 1.0000 | 0.71934 | 0.75915 | 0.06480 | Biso | 1.000 | P  |
| O35  | 1.0000 | 0.61138 | 0.75700 | 0.09607 | Biso | 1.000 | O  |
| O36  | 1.0000 | 0.71970 | 0.97945 | 0.77861 | Biso | 1.000 | O  |
| O37  | 1.0000 | 0.81294 | 0.44515 | 0.61105 | Biso | 1.000 | O  |
| O38  | 1.0000 | 0.48153 | 0.12220 | 0.45394 | Biso | 1.000 | O  |



|      |        |         |         |         |      |       |    |
|------|--------|---------|---------|---------|------|-------|----|
| O39  | 1.0000 | 0.64977 | 0.08197 | 0.53054 | Biso | 1.000 | O  |
| P12  | 1.0000 | 0.81906 | 0.40149 | 0.51724 | Biso | 1.000 | P  |
| O40  | 1.0000 | 0.70561 | 0.29797 | 0.49369 | Biso | 1.000 | O  |
| O41  | 1.0000 | 0.58755 | 0.43673 | 0.86592 | Biso | 1.000 | O  |
| O42  | 1.0000 | 0.52200 | 0.21474 | 0.79580 | Biso | 1.000 | O  |
| AI13 | 1.0000 | 0.72446 | 0.52456 | 0.06403 | Biso | 1.000 | AI |
| O43  | 1.0000 | 0.92028 | 0.10887 | 0.50087 | Biso | 1.000 | O  |
| AI14 | 1.0000 | 0.81274 | 0.41106 | 0.72444 | Biso | 1.000 | AI |
| O44  | 1.0000 | 0.91237 | 0.36980 | 0.51539 | Biso | 1.000 | O  |
| P13  | 1.0000 | 0.58774 | 0.18009 | 0.73354 | Biso | 1.000 | P  |
| O45  | 1.0000 | 0.56716 | 0.06434 | 0.76302 | Biso | 1.000 | O  |
| AI15 | 1.0000 | 0.59288 | 0.17090 | 0.52941 | Biso | 1.000 | AI |
| O46  | 1.0000 | 0.92854 | 0.06080 | 0.78032 | Biso | 1.000 | O  |
| O47  | 1.0000 | 0.77128 | 0.48942 | 0.78913 | Biso | 1.000 | O  |
| P14  | 1.0000 | 0.48959 | 0.29091 | 0.07396 | Biso | 1.000 | P  |
| O48  | 1.0000 | 0.60161 | 0.39862 | 0.09212 | Biso | 1.000 | O  |
| O49  | 1.0000 | 0.71497 | 0.26557 | 0.73751 | Biso | 1.000 | O  |
| O50  | 1.0000 | 0.94320 | 0.43257 | 0.75908 | Biso | 1.000 | O  |
| O51  | 1.0000 | 0.54342 | 0.17399 | 0.63754 | Biso | 1.000 | O  |
| O52  | 1.0000 | 0.47089 | 0.75951 | 0.95299 | Biso | 1.000 | O  |
| O53  | 1.0000 | 0.76702 | 0.51151 | 0.95538 | Biso | 1.000 | O  |
| O54  | 1.0000 | 0.74929 | 0.80765 | 0.96929 | Biso | 1.000 | O  |
| P15  | 1.0000 | 0.38661 | 0.86113 | 0.18895 | Biso | 1.000 | P  |
| O55  | 1.0000 | 0.37993 | 0.96234 | 0.15330 | Biso | 1.000 | O  |
| AI16 | 1.0000 | 0.37923 | 0.85930 | 0.39478 | Biso | 1.000 | AI |
| P16  | 1.0000 | 0.47679 | 0.73478 | 0.85345 | Biso | 1.000 | P  |
| O56  | 1.0000 | 0.36910 | 0.62925 | 0.82275 | Biso | 1.000 | O  |
| O57  | 1.0000 | 0.26819 | 0.75641 | 0.18849 | Biso | 1.000 | O  |
| O58  | 1.0000 | 0.02987 | 0.98554 | 0.18903 | Biso | 1.000 | O  |
| O59  | 1.0000 | 0.17165 | 0.52267 | 0.13795 | Biso | 1.000 | O  |
| O60  | 1.0000 | 0.14998 | 0.52718 | 0.46441 | Biso | 1.000 | O  |
| O61  | 1.0000 | 0.03246 | 0.62020 | 0.15151 | Biso | 1.000 | O  |
| O62  | 1.0000 | 0.43435 | 0.88442 | 0.28509 | Biso | 1.000 | O  |
| O63  | 1.0000 | 0.12810 | 0.57229 | 0.30691 | Biso | 1.000 | O  |
| O64  | 1.0000 | 0.31211 | 0.93741 | 0.41282 | Biso | 1.000 | O  |
| P17  | 1.0000 | 0.15592 | 0.61952 | 0.40282 | Biso | 1.000 | P  |
| O65  | 1.0000 | 0.27796 | 0.71767 | 0.40546 | Biso | 1.000 | O  |
| O66  | 1.0000 | 0.37828 | 0.60827 | 0.10259 | Biso | 1.000 | O  |
| AI17 | 1.0000 | 0.25312 | 0.51153 | 0.86852 | Biso | 1.000 | AI |
| O67  | 1.0000 | 0.05374 | 0.93170 | 0.40394 | Biso | 1.000 | O  |
| O68  | 1.0000 | 0.46696 | 0.84414 | 0.12820 | Biso | 1.000 | O  |
| O69  | 1.0000 | 0.07461 | 0.65833 | 0.43424 | Biso | 1.000 | O  |
| AI18 | 1.0000 | 0.15013 | 0.62067 | 0.19577 | Biso | 1.000 | AI |
| O70  | 1.0000 | 0.21037 | 0.22678 | 0.95801 | Biso | 1.000 | O  |

|     |        |         |         |         |      |       |   |
|-----|--------|---------|---------|---------|------|-------|---|
| O71 | 1.0000 | 0.48622 | 0.24498 | 0.97929 | Biso | 1.000 | O |
| O72 | 1.0000 | 0.23260 | 0.53907 | 0.97923 | Biso | 1.000 | O |
| H1  | 1.0000 | 0.93230 | 0.73615 | 0.59530 | Biso | 1.000 | H |
| C1  | 1.0000 | 0.45653 | 0.45601 | 0.69132 | Biso | 1.000 | C |
| H2  | 1.0000 | 0.46706 | 0.49218 | 0.75716 | Biso | 1.000 | H |
| H3  | 1.0000 | 0.36770 | 0.41566 | 0.67416 | Biso | 1.000 | H |
| H4  | 1.0000 | 0.47933 | 0.39145 | 0.69463 | Biso | 1.000 | H |
| C2  | 1.0000 | 0.57333 | 0.56637 | 0.25135 | Biso | 1.000 | C |
| C3  | 1.0000 | 0.53337 | 0.44989 | 0.39033 | Biso | 1.000 | C |
| C4  | 1.0000 | 0.56703 | 0.37874 | 0.33792 | Biso | 1.000 | C |
| C5  | 1.0000 | 0.51690 | 0.44348 | 0.48125 | Biso | 1.000 | C |
| C6  | 1.0000 | 0.50717 | 0.34745 | 0.53405 | Biso | 1.000 | C |
| C7  | 1.0000 | 0.50014 | 0.52478 | 0.52754 | Biso | 1.000 | C |
| C8  | 1.0000 | 0.52747 | 0.54909 | 0.62524 | Biso | 1.000 | C |
| C9  | 1.0000 | 0.46991 | 0.59189 | 0.48179 | Biso | 1.000 | C |
| C10 | 1.0000 | 0.42062 | 0.65128 | 0.53168 | Biso | 1.000 | C |
| C11 | 1.0000 | 0.48920 | 0.60399 | 0.38744 | Biso | 1.000 | C |
| C12 | 1.0000 | 0.51512 | 0.71261 | 0.34370 | Biso | 1.000 | C |
| C13 | 1.0000 | 0.52304 | 0.53417 | 0.34226 | Biso | 1.000 | C |
| H5  | 1.0000 | 0.55307 | 0.49365 | 0.21091 | Biso | 1.000 | H |
| H6  | 1.0000 | 0.66422 | 0.61485 | 0.25970 | Biso | 1.000 | H |
| H7  | 1.0000 | 0.54742 | 0.61773 | 0.21596 | Biso | 1.000 | H |
| H8  | 1.0000 | 0.64632 | 0.43172 | 0.30383 | Biso | 1.000 | H |
| H9  | 1.0000 | 0.50537 | 0.33055 | 0.28689 | Biso | 1.000 | H |
| H10 | 1.0000 | 0.57935 | 0.32114 | 0.37835 | Biso | 1.000 | H |
| H11 | 1.0000 | 0.42703 | 0.30561 | 0.56869 | Biso | 1.000 | H |
| H12 | 1.0000 | 0.57276 | 0.37269 | 0.58350 | Biso | 1.000 | H |
| H13 | 1.0000 | 0.50784 | 0.28652 | 0.49010 | Biso | 1.000 | H |
| H14 | 1.0000 | 0.51308 | 0.61740 | 0.64224 | Biso | 1.000 | H |
| H15 | 1.0000 | 0.48337 | 0.72604 | 0.56555 | Biso | 1.000 | H |
| H16 | 1.0000 | 0.36285 | 0.59626 | 0.58255 | Biso | 1.000 | H |
| H17 | 1.0000 | 0.37333 | 0.67420 | 0.48825 | Biso | 1.000 | H |
| H18 | 1.0000 | 0.60391 | 0.75882 | 0.32620 | Biso | 1.000 | H |
| H19 | 1.0000 | 0.50120 | 0.76431 | 0.38959 | Biso | 1.000 | H |
| H20 | 1.0000 | 0.46719 | 0.70124 | 0.28345 | Biso | 1.000 | H |
| C14 | 1.0000 | 0.36149 | 0.47568 | 0.33125 | Biso | 1.000 | C |
| H21 | 1.0000 | 0.36388 | 0.43941 | 0.26770 | Biso | 1.000 | H |
| H22 | 1.0000 | 0.32418 | 0.41452 | 0.38404 | Biso | 1.000 | H |
| H23 | 1.0000 | 0.32203 | 0.52618 | 0.32262 | Biso | 1.000 | H |
| C15 | 1.0000 | 0.65496 | 0.59846 | 0.63380 | Biso | 1.000 | C |
| O73 | 1.0000 | 0.94780 | 0.72852 | 0.65724 | Biso | 1.000 | O |
| H24 | 1.0000 | 0.68161 | 0.62741 | 0.70110 | Biso | 1.000 | H |
| H25 | 1.0000 | 0.68243 | 0.53906 | 0.61807 | Biso | 1.000 | H |
| H26 | 1.0000 | 0.69916 | 0.66971 | 0.58896 | Biso | 1.000 | H |

H27 1.0000 0.92178 0.77192 0.68961 Biso 1.000 H

TS-MS2/C3 in HMB-based pathway

data\_image0

\_cell\_length\_a 13.8042  
 \_cell\_length\_b 13.8042  
 \_cell\_length\_c 15.044  
 \_cell\_angle\_alpha 90  
 \_cell\_angle\_beta 90  
 \_cell\_angle\_gamma 120

\_symmetry\_space\_group\_name\_H-M P 1

\_symmetry\_int\_tables\_number 1

loop\_

\_symmetry\_equiv\_pos\_as\_xyz  
 'x, y, z'

loop\_

\_atom\_site\_label  
 \_atom\_site\_occupancy  
 \_atom\_site\_fract\_x  
 \_atom\_site\_fract\_y  
 \_atom\_site\_fract\_z  
 \_atom\_site\_thermal\_displace\_type  
 \_atom\_site\_B\_iso\_or\_equiv  
 \_atom\_site\_type\_symbol

|     |        |         |         |         |      |       |    |
|-----|--------|---------|---------|---------|------|-------|----|
| P1  | 1.0000 | 0.04792 | 0.18942 | 0.52451 | Biso | 1.000 | P  |
| O1  | 1.0000 | 0.08297 | 0.31241 | 0.50236 | Biso | 1.000 | O  |
| O2  | 1.0000 | 0.28505 | 0.40398 | 0.86448 | Biso | 1.000 | O  |
| O3  | 1.0000 | 0.13185 | 0.48578 | 0.81305 | Biso | 1.000 | O  |
| Al1 | 1.0000 | 0.25264 | 0.28092 | 0.06799 | Biso | 1.000 | Al |
| O4  | 1.0000 | 0.17481 | 0.12560 | 0.29688 | Biso | 1.000 | O  |
| Al2 | 1.0000 | 0.03872 | 0.18527 | 0.73885 | Biso | 1.000 | Al |
| P2  | 1.0000 | 0.14828 | 0.08452 | 0.19967 | Biso | 1.000 | P  |
| Al3 | 1.0000 | 0.15211 | 0.07143 | 0.40763 | Biso | 1.000 | Al |
| O5  | 1.0000 | 0.06399 | 0.17799 | 0.62526 | Biso | 1.000 | O  |
| P3  | 1.0000 | 0.25130 | 0.27849 | 0.86553 | Biso | 1.000 | P  |
| O6  | 1.0000 | 0.35407 | 0.26755 | 0.84219 | Biso | 1.000 | O  |
| O7  | 1.0000 | 0.23460 | 0.05147 | 0.16503 | Biso | 1.000 | O  |
| O8  | 1.0000 | 0.47692 | 0.20181 | 0.14166 | Biso | 1.000 | O  |
| Al4 | 1.0000 | 0.05254 | 0.41547 | 0.53775 | Biso | 1.000 | Al |
| O9  | 1.0000 | 0.16128 | 0.21309 | 0.79519 | Biso | 1.000 | O  |
| P4  | 1.0000 | 0.25994 | 0.51884 | 0.07744 | Biso | 1.000 | P  |
| Al5 | 1.0000 | 0.37037 | 0.07866 | 0.19179 | Biso | 1.000 | Al |

|      |        |         |         |         |      |       |    |
|------|--------|---------|---------|---------|------|-------|----|
| O10  | 1.0000 | 0.24786 | 0.40309 | 0.08766 | Biso | 1.000 | O  |
| O11  | 1.0000 | 0.00074 | 0.28889 | 0.75739 | Biso | 1.000 | O  |
| O12  | 1.0000 | 0.39592 | 0.10436 | 0.30637 | Biso | 1.000 | O  |
| O13  | 1.0000 | 0.12837 | 0.16337 | 0.47339 | Biso | 1.000 | O  |
| O14  | 1.0000 | 0.09462 | 0.45244 | 0.64970 | Biso | 1.000 | O  |
| P5   | 1.0000 | 0.36807 | 0.06686 | 0.40436 | Biso | 1.000 | P  |
| O15  | 1.0000 | 0.28967 | 0.10440 | 0.44457 | Biso | 1.000 | O  |
| O16  | 1.0000 | 0.39451 | 0.31786 | 0.08332 | Biso | 1.000 | O  |
| P6   | 1.0000 | 0.04221 | 0.41518 | 0.74366 | Biso | 1.000 | P  |
| Al6  | 1.0000 | 0.48746 | 0.29034 | 0.86932 | Biso | 1.000 | Al |
| O17  | 1.0000 | 0.15846 | 0.18255 | 0.14290 | Biso | 1.000 | O  |
| Al7  | 1.0000 | 0.93562 | 0.62720 | 0.40521 | Biso | 1.000 | Al |
| P7   | 1.0000 | 0.71435 | 0.51880 | 0.86348 | Biso | 1.000 | P  |
| Al8  | 1.0000 | 0.58733 | 0.95130 | 0.73885 | Biso | 1.000 | Al |
| O18  | 1.0000 | 0.73440 | 0.63767 | 0.84858 | Biso | 1.000 | O  |
| O19  | 1.0000 | 0.96538 | 0.75369 | 0.16971 | Biso | 1.000 | O  |
| O20  | 1.0000 | 0.81570 | 0.83102 | 0.12583 | Biso | 1.000 | O  |
| O21  | 1.0000 | 0.56326 | 0.91054 | 0.62543 | Biso | 1.000 | O  |
| O22  | 1.0000 | 0.84950 | 0.87252 | 0.48054 | Biso | 1.000 | O  |
| O23  | 1.0000 | 0.91135 | 0.60439 | 0.28958 | Biso | 1.000 | O  |
| P8   | 1.0000 | 0.59699 | 0.95747 | 0.52960 | Biso | 1.000 | P  |
| O24  | 1.0000 | 0.68266 | 0.92903 | 0.49004 | Biso | 1.000 | O  |
| O25  | 1.0000 | 0.57487 | 0.71512 | 0.83548 | Biso | 1.000 | O  |
| O26  | 1.0000 | 0.80274 | 0.85091 | 0.77796 | Biso | 1.000 | O  |
| P9   | 1.0000 | 0.93344 | 0.63145 | 0.18992 | Biso | 1.000 | P  |
| Al9  | 1.0000 | 0.48417 | 0.74524 | 0.06718 | Biso | 1.000 | Al |
| Si1  | 1.0000 | 0.91770 | 0.83759 | 0.41232 | Biso | 1.000 | Si |
| O27  | 1.0000 | 0.90149 | 0.71928 | 0.45139 | Biso | 1.000 | O  |
| O28  | 1.0000 | 0.69254 | 0.63560 | 0.05901 | Biso | 1.000 | O  |
| O29  | 1.0000 | 0.49114 | 0.90514 | 0.47088 | Biso | 1.000 | O  |
| Al10 | 1.0000 | 0.71573 | 0.75373 | 0.85879 | Biso | 1.000 | Al |
| O30  | 1.0000 | 0.81881 | 0.96406 | 0.64166 | Biso | 1.000 | O  |
| O31  | 1.0000 | 0.82576 | 0.54804 | 0.13963 | Biso | 1.000 | O  |
| P10  | 1.0000 | 0.81800 | 0.96368 | 0.74343 | Biso | 1.000 | P  |
| Al11 | 1.0000 | 0.91853 | 0.84768 | 0.20493 | Biso | 1.000 | Al |
| Al12 | 1.0000 | 0.82225 | 0.96940 | 0.52396 | Biso | 1.000 | Al |
| O32  | 1.0000 | 0.86490 | 0.81893 | 0.31132 | Biso | 1.000 | O  |
| O33  | 1.0000 | 0.85521 | 0.49004 | 0.44798 | Biso | 1.000 | O  |
| O34  | 1.0000 | 0.48653 | 0.83549 | 0.79874 | Biso | 1.000 | O  |
| P11  | 1.0000 | 0.72037 | 0.75961 | 0.06175 | Biso | 1.000 | P  |
| O35  | 1.0000 | 0.61503 | 0.76193 | 0.09403 | Biso | 1.000 | O  |
| O36  | 1.0000 | 0.72072 | 0.98037 | 0.77713 | Biso | 1.000 | O  |
| O37  | 1.0000 | 0.80841 | 0.44720 | 0.61117 | Biso | 1.000 | O  |
| O38  | 1.0000 | 0.48081 | 0.11921 | 0.45435 | Biso | 1.000 | O  |

|      |        |         |         |         |      |       |    |
|------|--------|---------|---------|---------|------|-------|----|
| O39  | 1.0000 | 0.65193 | 0.08629 | 0.53277 | Biso | 1.000 | O  |
| P12  | 1.0000 | 0.82015 | 0.40085 | 0.52029 | Biso | 1.000 | P  |
| O40  | 1.0000 | 0.70602 | 0.30097 | 0.49247 | Biso | 1.000 | O  |
| O41  | 1.0000 | 0.58591 | 0.43575 | 0.86507 | Biso | 1.000 | O  |
| O42  | 1.0000 | 0.52116 | 0.21408 | 0.79562 | Biso | 1.000 | O  |
| AI13 | 1.0000 | 0.72334 | 0.52527 | 0.06131 | Biso | 1.000 | AI |
| O43  | 1.0000 | 0.92392 | 0.11142 | 0.49740 | Biso | 1.000 | O  |
| AI14 | 1.0000 | 0.81187 | 0.41244 | 0.72398 | Biso | 1.000 | AI |
| O44  | 1.0000 | 0.90687 | 0.36073 | 0.52849 | Biso | 1.000 | O  |
| P13  | 1.0000 | 0.58814 | 0.18128 | 0.73316 | Biso | 1.000 | P  |
| O45  | 1.0000 | 0.56819 | 0.06542 | 0.76136 | Biso | 1.000 | O  |
| AI15 | 1.0000 | 0.59322 | 0.17361 | 0.52902 | Biso | 1.000 | AI |
| O46  | 1.0000 | 0.92977 | 0.05828 | 0.78067 | Biso | 1.000 | O  |
| O47  | 1.0000 | 0.76965 | 0.49063 | 0.78721 | Biso | 1.000 | O  |
| P14  | 1.0000 | 0.49003 | 0.29013 | 0.07259 | Biso | 1.000 | P  |
| O48  | 1.0000 | 0.60262 | 0.39764 | 0.08936 | Biso | 1.000 | O  |
| O49  | 1.0000 | 0.71527 | 0.26701 | 0.73809 | Biso | 1.000 | O  |
| O50  | 1.0000 | 0.94382 | 0.43638 | 0.75666 | Biso | 1.000 | O  |
| O51  | 1.0000 | 0.54460 | 0.17719 | 0.63719 | Biso | 1.000 | O  |
| O52  | 1.0000 | 0.47125 | 0.76163 | 0.95287 | Biso | 1.000 | O  |
| O53  | 1.0000 | 0.76671 | 0.51242 | 0.95309 | Biso | 1.000 | O  |
| O54  | 1.0000 | 0.75229 | 0.81036 | 0.96688 | Biso | 1.000 | O  |
| P15  | 1.0000 | 0.38562 | 0.86070 | 0.18964 | Biso | 1.000 | P  |
| O55  | 1.0000 | 0.38188 | 0.96386 | 0.15509 | Biso | 1.000 | O  |
| AI16 | 1.0000 | 0.37944 | 0.86079 | 0.39574 | Biso | 1.000 | AI |
| P16  | 1.0000 | 0.47628 | 0.73641 | 0.85336 | Biso | 1.000 | P  |
| O56  | 1.0000 | 0.36759 | 0.63118 | 0.82361 | Biso | 1.000 | O  |
| O57  | 1.0000 | 0.26585 | 0.75789 | 0.18871 | Biso | 1.000 | O  |
| O58  | 1.0000 | 0.02959 | 0.98537 | 0.18855 | Biso | 1.000 | O  |
| O59  | 1.0000 | 0.17614 | 0.52494 | 0.14127 | Biso | 1.000 | O  |
| O60  | 1.0000 | 0.13723 | 0.53551 | 0.47455 | Biso | 1.000 | O  |
| O61  | 1.0000 | 0.02937 | 0.61270 | 0.15756 | Biso | 1.000 | O  |
| O62  | 1.0000 | 0.43291 | 0.88158 | 0.28590 | Biso | 1.000 | O  |
| O63  | 1.0000 | 0.13598 | 0.57529 | 0.31170 | Biso | 1.000 | O  |
| O64  | 1.0000 | 0.31023 | 0.93736 | 0.41047 | Biso | 1.000 | O  |
| P17  | 1.0000 | 0.15715 | 0.62710 | 0.40624 | Biso | 1.000 | P  |
| O65  | 1.0000 | 0.28176 | 0.71896 | 0.41404 | Biso | 1.000 | O  |
| O66  | 1.0000 | 0.38179 | 0.60894 | 0.10218 | Biso | 1.000 | O  |
| AI17 | 1.0000 | 0.25279 | 0.51259 | 0.87022 | Biso | 1.000 | AI |
| O67  | 1.0000 | 0.05146 | 0.93262 | 0.40956 | Biso | 1.000 | O  |
| O68  | 1.0000 | 0.46507 | 0.84265 | 0.12873 | Biso | 1.000 | O  |
| O69  | 1.0000 | 0.08114 | 0.67662 | 0.42505 | Biso | 1.000 | O  |
| AI18 | 1.0000 | 0.15138 | 0.62028 | 0.19948 | Biso | 1.000 | AI |
| O70  | 1.0000 | 0.20663 | 0.22932 | 0.95911 | Biso | 1.000 | O  |

|     |        |         |         |         |      |       |   |
|-----|--------|---------|---------|---------|------|-------|---|
| O71 | 1.0000 | 0.48647 | 0.24282 | 0.97846 | Biso | 1.000 | O |
| O72 | 1.0000 | 0.23320 | 0.53867 | 0.98152 | Biso | 1.000 | O |
| H1  | 1.0000 | 0.92907 | 0.73450 | 0.59496 | Biso | 1.000 | H |
| C1  | 1.0000 | 0.44812 | 0.43791 | 0.68600 | Biso | 1.000 | C |
| H2  | 1.0000 | 0.45277 | 0.47242 | 0.75182 | Biso | 1.000 | H |
| H3  | 1.0000 | 0.35983 | 0.38829 | 0.66757 | Biso | 1.000 | H |
| H4  | 1.0000 | 0.48187 | 0.38193 | 0.69020 | Biso | 1.000 | H |
| C2  | 1.0000 | 0.57610 | 0.56141 | 0.24241 | Biso | 1.000 | C |
| C3  | 1.0000 | 0.54559 | 0.45600 | 0.38552 | Biso | 1.000 | C |
| C4  | 1.0000 | 0.58826 | 0.38750 | 0.33973 | Biso | 1.000 | C |
| C5  | 1.0000 | 0.51510 | 0.44014 | 0.47747 | Biso | 1.000 | C |
| C6  | 1.0000 | 0.50578 | 0.34233 | 0.52718 | Biso | 1.000 | C |
| C7  | 1.0000 | 0.49383 | 0.51506 | 0.52250 | Biso | 1.000 | C |
| C8  | 1.0000 | 0.51225 | 0.53546 | 0.62175 | Biso | 1.000 | C |
| C9  | 1.0000 | 0.47494 | 0.59202 | 0.47238 | Biso | 1.000 | C |
| C10 | 1.0000 | 0.44915 | 0.66989 | 0.52309 | Biso | 1.000 | C |
| C11 | 1.0000 | 0.50602 | 0.60945 | 0.37947 | Biso | 1.000 | C |
| C12 | 1.0000 | 0.52698 | 0.71370 | 0.33148 | Biso | 1.000 | C |
| C13 | 1.0000 | 0.54229 | 0.54019 | 0.33783 | Biso | 1.000 | C |
| H5  | 1.0000 | 0.56784 | 0.48745 | 0.21058 | Biso | 1.000 | H |
| H6  | 1.0000 | 0.66324 | 0.62826 | 0.23725 | Biso | 1.000 | H |
| H7  | 1.0000 | 0.52560 | 0.58726 | 0.20502 | Biso | 1.000 | H |
| H8  | 1.0000 | 0.65966 | 0.44047 | 0.29766 | Biso | 1.000 | H |
| H9  | 1.0000 | 0.52412 | 0.32355 | 0.29718 | Biso | 1.000 | H |
| H10 | 1.0000 | 0.61587 | 0.34622 | 0.38576 | Biso | 1.000 | H |
| H11 | 1.0000 | 0.42642 | 0.29871 | 0.56235 | Biso | 1.000 | H |
| H12 | 1.0000 | 0.57274 | 0.36666 | 0.57534 | Biso | 1.000 | H |
| H13 | 1.0000 | 0.50661 | 0.28364 | 0.48076 | Biso | 1.000 | H |
| H14 | 1.0000 | 0.48669 | 0.59521 | 0.64061 | Biso | 1.000 | H |
| H15 | 1.0000 | 0.52383 | 0.73152 | 0.55775 | Biso | 1.000 | H |
| H16 | 1.0000 | 0.38396 | 0.62472 | 0.57255 | Biso | 1.000 | H |
| H17 | 1.0000 | 0.41980 | 0.71205 | 0.48056 | Biso | 1.000 | H |
| H18 | 1.0000 | 0.61339 | 0.75609 | 0.30776 | Biso | 1.000 | H |
| H19 | 1.0000 | 0.51909 | 0.77190 | 0.37451 | Biso | 1.000 | H |
| H20 | 1.0000 | 0.47304 | 0.69591 | 0.27377 | Biso | 1.000 | H |
| C14 | 1.0000 | 0.34448 | 0.50529 | 0.39821 | Biso | 1.000 | C |
| H21 | 1.0000 | 0.33704 | 0.42390 | 0.39134 | Biso | 1.000 | H |
| H22 | 1.0000 | 0.29244 | 0.50898 | 0.45023 | Biso | 1.000 | H |
| H23 | 1.0000 | 0.32932 | 0.53679 | 0.33673 | Biso | 1.000 | H |
| C15 | 1.0000 | 0.64057 | 0.59689 | 0.63425 | Biso | 1.000 | C |
| O73 | 1.0000 | 0.94710 | 0.72845 | 0.65655 | Biso | 1.000 | O |
| H24 | 1.0000 | 0.66173 | 0.62281 | 0.70286 | Biso | 1.000 | H |
| H25 | 1.0000 | 0.67654 | 0.54479 | 0.61719 | Biso | 1.000 | H |
| H26 | 1.0000 | 0.68146 | 0.67145 | 0.59228 | Biso | 1.000 | H |

H27 1.0000 0.91884 0.76940 0.68964 Biso 1.000 H



TS-MS3/C3 in HMB-based pathway

data\_image0

\_cell\_length\_a 13.8042  
 \_cell\_length\_b 13.8042  
 \_cell\_length\_c 15.044  
 \_cell\_angle\_alpha 90  
 \_cell\_angle\_beta 90  
 \_cell\_angle\_gamma 120

\_symmetry\_space\_group\_name\_H-M P 1

\_symmetry\_int\_tables\_number 1

loop\_

\_symmetry\_equiv\_pos\_as\_xyz  
 'x, y, z'

loop\_

\_atom\_site\_label  
 \_atom\_site\_occupancy  
 \_atom\_site\_fract\_x  
 \_atom\_site\_fract\_y  
 \_atom\_site\_fract\_z  
 \_atom\_site\_thermal\_displace\_type  
 \_atom\_site\_B\_iso\_or\_equiv  
 \_atom\_site\_type\_symbol

|     |        |         |         |         |      |       |    |
|-----|--------|---------|---------|---------|------|-------|----|
| P1  | 1.0000 | 0.04597 | 0.18725 | 0.52212 | Biso | 1.000 | P  |
| O1  | 1.0000 | 0.07658 | 0.30776 | 0.49619 | Biso | 1.000 | O  |
| O2  | 1.0000 | 0.28380 | 0.40328 | 0.86194 | Biso | 1.000 | O  |
| O3  | 1.0000 | 0.13826 | 0.49264 | 0.80634 | Biso | 1.000 | O  |
| Al1 | 1.0000 | 0.25366 | 0.28163 | 0.06637 | Biso | 1.000 | Al |
| O4  | 1.0000 | 0.17780 | 0.12719 | 0.29614 | Biso | 1.000 | O  |
| Al2 | 1.0000 | 0.04164 | 0.18693 | 0.73786 | Biso | 1.000 | Al |
| P2  | 1.0000 | 0.15011 | 0.08581 | 0.19896 | Biso | 1.000 | P  |
| Al3 | 1.0000 | 0.15293 | 0.07185 | 0.40656 | Biso | 1.000 | Al |
| O5  | 1.0000 | 0.06281 | 0.18087 | 0.62344 | Biso | 1.000 | O  |
| P3  | 1.0000 | 0.25320 | 0.27873 | 0.86392 | Biso | 1.000 | P  |
| O6  | 1.0000 | 0.35829 | 0.27114 | 0.84190 | Biso | 1.000 | O  |
| O7  | 1.0000 | 0.23610 | 0.05245 | 0.16399 | Biso | 1.000 | O  |
| O8  | 1.0000 | 0.47865 | 0.20508 | 0.14310 | Biso | 1.000 | O  |
| Al4 | 1.0000 | 0.05041 | 0.41306 | 0.53288 | Biso | 1.000 | Al |
| O9  | 1.0000 | 0.16469 | 0.21193 | 0.79260 | Biso | 1.000 | O  |
| P4  | 1.0000 | 0.26013 | 0.51965 | 0.07436 | Biso | 1.000 | P  |
| Al5 | 1.0000 | 0.37207 | 0.08033 | 0.19155 | Biso | 1.000 | Al |

|      |        |         |         |         |      |       |    |
|------|--------|---------|---------|---------|------|-------|----|
| O10  | 1.0000 | 0.24801 | 0.40374 | 0.08352 | Biso | 1.000 | O  |
| O11  | 1.0000 | 0.00683 | 0.29204 | 0.75968 | Biso | 1.000 | O  |
| O12  | 1.0000 | 0.39616 | 0.10435 | 0.30634 | Biso | 1.000 | O  |
| O13  | 1.0000 | 0.12940 | 0.16295 | 0.47372 | Biso | 1.000 | O  |
| O14  | 1.0000 | 0.09358 | 0.44800 | 0.64493 | Biso | 1.000 | O  |
| P5   | 1.0000 | 0.36841 | 0.06614 | 0.40414 | Biso | 1.000 | P  |
| O15  | 1.0000 | 0.28932 | 0.10276 | 0.44446 | Biso | 1.000 | O  |
| O16  | 1.0000 | 0.39580 | 0.31932 | 0.08159 | Biso | 1.000 | O  |
| P6   | 1.0000 | 0.04572 | 0.41678 | 0.74073 | Biso | 1.000 | P  |
| Al6  | 1.0000 | 0.49095 | 0.29235 | 0.87045 | Biso | 1.000 | Al |
| O17  | 1.0000 | 0.15998 | 0.18355 | 0.14187 | Biso | 1.000 | O  |
| Al7  | 1.0000 | 0.93888 | 0.62767 | 0.40449 | Biso | 1.000 | Al |
| P7   | 1.0000 | 0.71830 | 0.52072 | 0.86487 | Biso | 1.000 | P  |
| Al8  | 1.0000 | 0.58977 | 0.95387 | 0.73928 | Biso | 1.000 | Al |
| O18  | 1.0000 | 0.73828 | 0.63904 | 0.84647 | Biso | 1.000 | O  |
| O19  | 1.0000 | 0.96583 | 0.75504 | 0.16766 | Biso | 1.000 | O  |
| O20  | 1.0000 | 0.81726 | 0.83488 | 0.12567 | Biso | 1.000 | O  |
| O21  | 1.0000 | 0.56651 | 0.91842 | 0.62505 | Biso | 1.000 | O  |
| O22  | 1.0000 | 0.84663 | 0.86684 | 0.48040 | Biso | 1.000 | O  |
| O23  | 1.0000 | 0.91958 | 0.60791 | 0.28848 | Biso | 1.000 | O  |
| P8   | 1.0000 | 0.59947 | 0.96082 | 0.52806 | Biso | 1.000 | P  |
| O24  | 1.0000 | 0.68297 | 0.92854 | 0.48999 | Biso | 1.000 | O  |
| O25  | 1.0000 | 0.57813 | 0.71564 | 0.83438 | Biso | 1.000 | O  |
| O26  | 1.0000 | 0.80679 | 0.85307 | 0.77935 | Biso | 1.000 | O  |
| P9   | 1.0000 | 0.93662 | 0.63367 | 0.18841 | Biso | 1.000 | P  |
| Al9  | 1.0000 | 0.48538 | 0.74615 | 0.06613 | Biso | 1.000 | Al |
| Si1  | 1.0000 | 0.91785 | 0.83660 | 0.41137 | Biso | 1.000 | Si |
| O27  | 1.0000 | 0.90527 | 0.71998 | 0.45048 | Biso | 1.000 | O  |
| O28  | 1.0000 | 0.69575 | 0.63782 | 0.06127 | Biso | 1.000 | O  |
| O29  | 1.0000 | 0.49270 | 0.90747 | 0.47053 | Biso | 1.000 | O  |
| Al10 | 1.0000 | 0.71875 | 0.75453 | 0.85883 | Biso | 1.000 | Al |
| O30  | 1.0000 | 0.81930 | 0.96078 | 0.64121 | Biso | 1.000 | O  |
| O31  | 1.0000 | 0.82681 | 0.54818 | 0.14147 | Biso | 1.000 | O  |
| P10  | 1.0000 | 0.82005 | 0.96422 | 0.74294 | Biso | 1.000 | P  |
| Al11 | 1.0000 | 0.91963 | 0.84905 | 0.20425 | Biso | 1.000 | Al |
| Al12 | 1.0000 | 0.82131 | 0.96513 | 0.52351 | Biso | 1.000 | Al |
| O32  | 1.0000 | 0.86561 | 0.81772 | 0.31038 | Biso | 1.000 | O  |
| O33  | 1.0000 | 0.85242 | 0.49137 | 0.44695 | Biso | 1.000 | O  |
| O34  | 1.0000 | 0.48935 | 0.83526 | 0.79663 | Biso | 1.000 | O  |
| P11  | 1.0000 | 0.72174 | 0.76120 | 0.06247 | Biso | 1.000 | P  |
| O35  | 1.0000 | 0.61563 | 0.76221 | 0.09427 | Biso | 1.000 | O  |
| O36  | 1.0000 | 0.72293 | 0.98117 | 0.77639 | Biso | 1.000 | O  |
| O37  | 1.0000 | 0.81121 | 0.44971 | 0.61112 | Biso | 1.000 | O  |
| O38  | 1.0000 | 0.48089 | 0.11970 | 0.45453 | Biso | 1.000 | O  |

|      |        |         |         |         |      |       |    |
|------|--------|---------|---------|---------|------|-------|----|
| O39  | 1.0000 | 0.65637 | 0.08985 | 0.52724 | Biso | 1.000 | O  |
| P12  | 1.0000 | 0.81920 | 0.40271 | 0.51936 | Biso | 1.000 | P  |
| O40  | 1.0000 | 0.70371 | 0.30359 | 0.49356 | Biso | 1.000 | O  |
| O41  | 1.0000 | 0.58992 | 0.43796 | 0.86974 | Biso | 1.000 | O  |
| O42  | 1.0000 | 0.52616 | 0.21943 | 0.79431 | Biso | 1.000 | O  |
| AI13 | 1.0000 | 0.72582 | 0.52722 | 0.06238 | Biso | 1.000 | AI |
| O43  | 1.0000 | 0.92298 | 0.10590 | 0.49543 | Biso | 1.000 | O  |
| AI14 | 1.0000 | 0.81453 | 0.41331 | 0.72345 | Biso | 1.000 | AI |
| O44  | 1.0000 | 0.90545 | 0.36170 | 0.52441 | Biso | 1.000 | O  |
| P13  | 1.0000 | 0.59098 | 0.18198 | 0.73364 | Biso | 1.000 | P  |
| O45  | 1.0000 | 0.57110 | 0.06755 | 0.76634 | Biso | 1.000 | O  |
| AI15 | 1.0000 | 0.59383 | 0.17380 | 0.52858 | Biso | 1.000 | AI |
| O46  | 1.0000 | 0.93171 | 0.06049 | 0.77869 | Biso | 1.000 | O  |
| O47  | 1.0000 | 0.77088 | 0.48868 | 0.78893 | Biso | 1.000 | O  |
| P14  | 1.0000 | 0.49182 | 0.29200 | 0.07268 | Biso | 1.000 | P  |
| O48  | 1.0000 | 0.60390 | 0.40017 | 0.08916 | Biso | 1.000 | O  |
| O49  | 1.0000 | 0.71847 | 0.26723 | 0.73564 | Biso | 1.000 | O  |
| O50  | 1.0000 | 0.94710 | 0.43754 | 0.75436 | Biso | 1.000 | O  |
| O51  | 1.0000 | 0.54482 | 0.17202 | 0.63779 | Biso | 1.000 | O  |
| O52  | 1.0000 | 0.47439 | 0.76311 | 0.95134 | Biso | 1.000 | O  |
| O53  | 1.0000 | 0.77293 | 0.51822 | 0.95438 | Biso | 1.000 | O  |
| O54  | 1.0000 | 0.75269 | 0.81036 | 0.96705 | Biso | 1.000 | O  |
| P15  | 1.0000 | 0.38775 | 0.86264 | 0.18783 | Biso | 1.000 | P  |
| O55  | 1.0000 | 0.38534 | 0.96687 | 0.15411 | Biso | 1.000 | O  |
| AI16 | 1.0000 | 0.38133 | 0.86033 | 0.39465 | Biso | 1.000 | AI |
| P16  | 1.0000 | 0.47951 | 0.73697 | 0.85209 | Biso | 1.000 | P  |
| O56  | 1.0000 | 0.37149 | 0.63119 | 0.82216 | Biso | 1.000 | O  |
| O57  | 1.0000 | 0.26762 | 0.76049 | 0.18544 | Biso | 1.000 | O  |
| O58  | 1.0000 | 0.03098 | 0.98704 | 0.18885 | Biso | 1.000 | O  |
| O59  | 1.0000 | 0.17622 | 0.52554 | 0.13821 | Biso | 1.000 | O  |
| O60  | 1.0000 | 0.14044 | 0.53083 | 0.46910 | Biso | 1.000 | O  |
| O61  | 1.0000 | 0.03249 | 0.61655 | 0.15314 | Biso | 1.000 | O  |
| O62  | 1.0000 | 0.43383 | 0.88193 | 0.28442 | Biso | 1.000 | O  |
| O63  | 1.0000 | 0.13838 | 0.57930 | 0.30852 | Biso | 1.000 | O  |
| O64  | 1.0000 | 0.31180 | 0.93680 | 0.40998 | Biso | 1.000 | O  |
| P17  | 1.0000 | 0.15981 | 0.62598 | 0.40455 | Biso | 1.000 | P  |
| O65  | 1.0000 | 0.28394 | 0.71845 | 0.41434 | Biso | 1.000 | O  |
| O66  | 1.0000 | 0.38183 | 0.60969 | 0.09904 | Biso | 1.000 | O  |
| AI17 | 1.0000 | 0.25460 | 0.51394 | 0.86769 | Biso | 1.000 | AI |
| O67  | 1.0000 | 0.05074 | 0.93390 | 0.40860 | Biso | 1.000 | O  |
| O68  | 1.0000 | 0.46701 | 0.84476 | 0.12656 | Biso | 1.000 | O  |
| O69  | 1.0000 | 0.08236 | 0.67256 | 0.42796 | Biso | 1.000 | O  |
| AI18 | 1.0000 | 0.15358 | 0.62261 | 0.19610 | Biso | 1.000 | AI |
| O70  | 1.0000 | 0.20836 | 0.22904 | 0.95730 | Biso | 1.000 | O  |

|     |        |         |         |         |      |       |   |
|-----|--------|---------|---------|---------|------|-------|---|
| O71 | 1.0000 | 0.48921 | 0.24305 | 0.97920 | Biso | 1.000 | O |
| O72 | 1.0000 | 0.23312 | 0.53973 | 0.97844 | Biso | 1.000 | O |
| H1  | 1.0000 | 0.93153 | 0.73297 | 0.59189 | Biso | 1.000 | H |
| C1  | 1.0000 | 0.46269 | 0.44635 | 0.69247 | Biso | 1.000 | C |
| H2  | 1.0000 | 0.47369 | 0.48417 | 0.75771 | Biso | 1.000 | H |
| H3  | 1.0000 | 0.37283 | 0.39624 | 0.68031 | Biso | 1.000 | H |
| H4  | 1.0000 | 0.49610 | 0.39002 | 0.69447 | Biso | 1.000 | H |
| C2  | 1.0000 | 0.57115 | 0.56104 | 0.24681 | Biso | 1.000 | C |
| C3  | 1.0000 | 0.54590 | 0.45701 | 0.39101 | Biso | 1.000 | C |
| C4  | 1.0000 | 0.58601 | 0.38891 | 0.34152 | Biso | 1.000 | C |
| C5  | 1.0000 | 0.51696 | 0.43948 | 0.47989 | Biso | 1.000 | C |
| C6  | 1.0000 | 0.50146 | 0.33990 | 0.53044 | Biso | 1.000 | C |
| C7  | 1.0000 | 0.49292 | 0.51571 | 0.52637 | Biso | 1.000 | C |
| C8  | 1.0000 | 0.52054 | 0.53998 | 0.62442 | Biso | 1.000 | C |
| C9  | 1.0000 | 0.47633 | 0.59491 | 0.47704 | Biso | 1.000 | C |
| C10 | 1.0000 | 0.46005 | 0.67915 | 0.52830 | Biso | 1.000 | C |
| C11 | 1.0000 | 0.50802 | 0.61291 | 0.38432 | Biso | 1.000 | C |
| C12 | 1.0000 | 0.51066 | 0.70805 | 0.33411 | Biso | 1.000 | C |
| C13 | 1.0000 | 0.54058 | 0.54437 | 0.34336 | Biso | 1.000 | C |
| H5  | 1.0000 | 0.56146 | 0.48576 | 0.21634 | Biso | 1.000 | H |
| H6  | 1.0000 | 0.65861 | 0.62675 | 0.24016 | Biso | 1.000 | H |
| H7  | 1.0000 | 0.52033 | 0.58634 | 0.20935 | Biso | 1.000 | H |
| H8  | 1.0000 | 0.66241 | 0.44405 | 0.30496 | Biso | 1.000 | H |
| H9  | 1.0000 | 0.52427 | 0.33352 | 0.29311 | Biso | 1.000 | H |
| H10 | 1.0000 | 0.60543 | 0.33872 | 0.38498 | Biso | 1.000 | H |
| H11 | 1.0000 | 0.42058 | 0.29874 | 0.56407 | Biso | 1.000 | H |
| H12 | 1.0000 | 0.56581 | 0.36066 | 0.58042 | Biso | 1.000 | H |
| H13 | 1.0000 | 0.50053 | 0.27985 | 0.48453 | Biso | 1.000 | H |
| H14 | 1.0000 | 0.49915 | 0.60245 | 0.64436 | Biso | 1.000 | H |
| H15 | 1.0000 | 0.54063 | 0.74442 | 0.55246 | Biso | 1.000 | H |
| H16 | 1.0000 | 0.40467 | 0.64284 | 0.58518 | Biso | 1.000 | H |
| H17 | 1.0000 | 0.42314 | 0.71534 | 0.48687 | Biso | 1.000 | H |
| H18 | 1.0000 | 0.57586 | 0.73992 | 0.28368 | Biso | 1.000 | H |
| H19 | 1.0000 | 0.52948 | 0.77784 | 0.37753 | Biso | 1.000 | H |
| H20 | 1.0000 | 0.43098 | 0.68193 | 0.30064 | Biso | 1.000 | H |
| C14 | 1.0000 | 0.33801 | 0.46107 | 0.48953 | Biso | 1.000 | C |
| H21 | 1.0000 | 0.32799 | 0.40755 | 0.43363 | Biso | 1.000 | H |
| H22 | 1.0000 | 0.31221 | 0.41541 | 0.55203 | Biso | 1.000 | H |
| H23 | 1.0000 | 0.29446 | 0.50737 | 0.48132 | Biso | 1.000 | H |
| C15 | 1.0000 | 0.64989 | 0.59943 | 0.62690 | Biso | 1.000 | C |
| O73 | 1.0000 | 0.94717 | 0.72415 | 0.65361 | Biso | 1.000 | O |
| H24 | 1.0000 | 0.67936 | 0.63413 | 0.69257 | Biso | 1.000 | H |
| H25 | 1.0000 | 0.68141 | 0.54295 | 0.61240 | Biso | 1.000 | H |
| H26 | 1.0000 | 0.68754 | 0.66796 | 0.57891 | Biso | 1.000 | H |

H27 1.0000 0.92562 0.77065 0.68673 Biso 1.000 H

TS9-10/C3 in HMB-based pathway

data\_image0

\_cell\_length\_a 13.8042  
 \_cell\_length\_b 13.8042  
 \_cell\_length\_c 15.044  
 \_cell\_angle\_alpha 90  
 \_cell\_angle\_beta 90  
 \_cell\_angle\_gamma 120

\_symmetry\_space\_group\_name\_H-M P 1

\_symmetry\_int\_tables\_number 1

loop\_

\_symmetry\_equiv\_pos\_as\_xyz  
 'x, y, z'

loop\_

\_atom\_site\_label  
 \_atom\_site\_occupancy  
 \_atom\_site\_fract\_x  
 \_atom\_site\_fract\_y  
 \_atom\_site\_fract\_z  
 \_atom\_site\_thermal\_displace\_type  
 \_atom\_site\_B\_iso\_or\_equiv  
 \_atom\_site\_type\_symbol

|     |        |         |         |         |      |       |    |
|-----|--------|---------|---------|---------|------|-------|----|
| P1  | 1.0000 | 0.04999 | 0.18497 | 0.51904 | Biso | 1.000 | P  |
| O1  | 1.0000 | 0.08196 | 0.30825 | 0.51017 | Biso | 1.000 | O  |
| O2  | 1.0000 | 0.27321 | 0.39958 | 0.85326 | Biso | 1.000 | O  |
| O3  | 1.0000 | 0.14928 | 0.50351 | 0.79079 | Biso | 1.000 | O  |
| Al1 | 1.0000 | 0.25786 | 0.28050 | 0.05638 | Biso | 1.000 | Al |
| O4  | 1.0000 | 0.18762 | 0.13894 | 0.27920 | Biso | 1.000 | O  |
| Al2 | 1.0000 | 0.06098 | 0.18653 | 0.72466 | Biso | 1.000 | Al |
| P2  | 1.0000 | 0.15446 | 0.08405 | 0.18608 | Biso | 1.000 | P  |
| Al3 | 1.0000 | 0.16191 | 0.08236 | 0.38872 | Biso | 1.000 | Al |
| O5  | 1.0000 | 0.08201 | 0.16272 | 0.61303 | Biso | 1.000 | O  |
| P3  | 1.0000 | 0.26694 | 0.28480 | 0.85190 | Biso | 1.000 | P  |
| O6  | 1.0000 | 0.38175 | 0.30226 | 0.82196 | Biso | 1.000 | O  |
| O7  | 1.0000 | 0.24017 | 0.04816 | 0.15593 | Biso | 1.000 | O  |
| O8  | 1.0000 | 0.47925 | 0.20102 | 0.13409 | Biso | 1.000 | O  |
| Al4 | 1.0000 | 0.05178 | 0.41561 | 0.52361 | Biso | 1.000 | Al |
| O9  | 1.0000 | 0.17823 | 0.20548 | 0.78485 | Biso | 1.000 | O  |
| P4  | 1.0000 | 0.25817 | 0.51482 | 0.06397 | Biso | 1.000 | P  |
| Al5 | 1.0000 | 0.37615 | 0.07624 | 0.18411 | Biso | 1.000 | Al |

|      |        |         |         |         |      |       |    |
|------|--------|---------|---------|---------|------|-------|----|
| O10  | 1.0000 | 0.23646 | 0.39455 | 0.06617 | Biso | 1.000 | O  |
| O11  | 1.0000 | 0.04130 | 0.30279 | 0.73457 | Biso | 1.000 | O  |
| O12  | 1.0000 | 0.40485 | 0.09658 | 0.29872 | Biso | 1.000 | O  |
| O13  | 1.0000 | 0.11772 | 0.16168 | 0.45043 | Biso | 1.000 | O  |
| O14  | 1.0000 | 0.07918 | 0.46621 | 0.63426 | Biso | 1.000 | O  |
| P5   | 1.0000 | 0.37360 | 0.06522 | 0.39740 | Biso | 1.000 | P  |
| O15  | 1.0000 | 0.29281 | 0.10406 | 0.42977 | Biso | 1.000 | O  |
| O16  | 1.0000 | 0.39712 | 0.32259 | 0.08815 | Biso | 1.000 | O  |
| P6   | 1.0000 | 0.05359 | 0.42039 | 0.73042 | Biso | 1.000 | P  |
| AI6  | 1.0000 | 0.50025 | 0.30061 | 0.86320 | Biso | 1.000 | AI |
| O17  | 1.0000 | 0.15691 | 0.17156 | 0.12060 | Biso | 1.000 | O  |
| AI7  | 1.0000 | 0.94729 | 0.63086 | 0.40432 | Biso | 1.000 | AI |
| P7   | 1.0000 | 0.73804 | 0.52653 | 0.86709 | Biso | 1.000 | P  |
| AI8  | 1.0000 | 0.59555 | 0.95446 | 0.73457 | Biso | 1.000 | AI |
| O18  | 1.0000 | 0.75670 | 0.64501 | 0.84949 | Biso | 1.000 | O  |
| O19  | 1.0000 | 0.96417 | 0.74811 | 0.15822 | Biso | 1.000 | O  |
| O20  | 1.0000 | 0.82050 | 0.83727 | 0.12506 | Biso | 1.000 | O  |
| O21  | 1.0000 | 0.56522 | 0.91898 | 0.62092 | Biso | 1.000 | O  |
| O22  | 1.0000 | 0.87221 | 0.88756 | 0.46891 | Biso | 1.000 | O  |
| O23  | 1.0000 | 0.93403 | 0.61739 | 0.28846 | Biso | 1.000 | O  |
| P8   | 1.0000 | 0.60319 | 0.96157 | 0.52461 | Biso | 1.000 | P  |
| O24  | 1.0000 | 0.68861 | 0.92799 | 0.49250 | Biso | 1.000 | O  |
| O25  | 1.0000 | 0.58987 | 0.71494 | 0.82453 | Biso | 1.000 | O  |
| O26  | 1.0000 | 0.82049 | 0.86249 | 0.78938 | Biso | 1.000 | O  |
| P9   | 1.0000 | 0.93877 | 0.62989 | 0.18665 | Biso | 1.000 | P  |
| AI9  | 1.0000 | 0.48737 | 0.73685 | 0.06461 | Biso | 1.000 | AI |
| Si1  | 1.0000 | 0.93661 | 0.84778 | 0.40073 | Biso | 1.000 | Si |
| O27  | 1.0000 | 0.93304 | 0.73826 | 0.44964 | Biso | 1.000 | O  |
| O28  | 1.0000 | 0.69953 | 0.63567 | 0.06953 | Biso | 1.000 | O  |
| O29  | 1.0000 | 0.49969 | 0.90943 | 0.46372 | Biso | 1.000 | O  |
| AI10 | 1.0000 | 0.72756 | 0.75490 | 0.86082 | Biso | 1.000 | AI |
| O30  | 1.0000 | 0.82800 | 0.93773 | 0.63828 | Biso | 1.000 | O  |
| O31  | 1.0000 | 0.82435 | 0.53876 | 0.14964 | Biso | 1.000 | O  |
| P10  | 1.0000 | 0.83021 | 0.96454 | 0.73832 | Biso | 1.000 | P  |
| AI11 | 1.0000 | 0.92428 | 0.84547 | 0.19847 | Biso | 1.000 | AI |
| AI12 | 1.0000 | 0.82842 | 0.96724 | 0.52212 | Biso | 1.000 | AI |
| O32  | 1.0000 | 0.87190 | 0.81060 | 0.30528 | Biso | 1.000 | O  |
| O33  | 1.0000 | 0.84123 | 0.50311 | 0.45140 | Biso | 1.000 | O  |
| O34  | 1.0000 | 0.50190 | 0.83720 | 0.79687 | Biso | 1.000 | O  |
| P11  | 1.0000 | 0.72098 | 0.75721 | 0.06772 | Biso | 1.000 | P  |
| O35  | 1.0000 | 0.61517 | 0.75547 | 0.10339 | Biso | 1.000 | O  |
| O36  | 1.0000 | 0.73329 | 0.98617 | 0.76160 | Biso | 1.000 | O  |
| O37  | 1.0000 | 0.83418 | 0.45588 | 0.61407 | Biso | 1.000 | O  |
| O38  | 1.0000 | 0.48323 | 0.12316 | 0.45224 | Biso | 1.000 | O  |

|      |        |         |         |         |      |       |    |
|------|--------|---------|---------|---------|------|-------|----|
| O39  | 1.0000 | 0.65978 | 0.09109 | 0.52255 | Biso | 1.000 | O  |
| P12  | 1.0000 | 0.82268 | 0.41026 | 0.51749 | Biso | 1.000 | P  |
| O40  | 1.0000 | 0.70271 | 0.31209 | 0.50253 | Biso | 1.000 | O  |
| O41  | 1.0000 | 0.61077 | 0.44139 | 0.85970 | Biso | 1.000 | O  |
| O42  | 1.0000 | 0.52143 | 0.21090 | 0.79397 | Biso | 1.000 | O  |
| AI13 | 1.0000 | 0.72823 | 0.52474 | 0.06795 | Biso | 1.000 | AI |
| O43  | 1.0000 | 0.92135 | 0.11256 | 0.50551 | Biso | 1.000 | O  |
| AI14 | 1.0000 | 0.82381 | 0.41176 | 0.72634 | Biso | 1.000 | AI |
| O44  | 1.0000 | 0.90928 | 0.37139 | 0.50079 | Biso | 1.000 | O  |
| P13  | 1.0000 | 0.58999 | 0.17985 | 0.73160 | Biso | 1.000 | P  |
| O45  | 1.0000 | 0.57760 | 0.06798 | 0.76360 | Biso | 1.000 | O  |
| AI15 | 1.0000 | 0.59605 | 0.17498 | 0.52646 | Biso | 1.000 | AI |
| O46  | 1.0000 | 0.94117 | 0.06805 | 0.76620 | Biso | 1.000 | O  |
| O47  | 1.0000 | 0.80319 | 0.50230 | 0.79577 | Biso | 1.000 | O  |
| P14  | 1.0000 | 0.49095 | 0.29387 | 0.07076 | Biso | 1.000 | P  |
| O48  | 1.0000 | 0.60448 | 0.39885 | 0.08899 | Biso | 1.000 | O  |
| O49  | 1.0000 | 0.71532 | 0.27105 | 0.73427 | Biso | 1.000 | O  |
| O50  | 1.0000 | 0.94420 | 0.41222 | 0.76378 | Biso | 1.000 | O  |
| O51  | 1.0000 | 0.54420 | 0.16826 | 0.63572 | Biso | 1.000 | O  |
| O52  | 1.0000 | 0.49287 | 0.75995 | 0.94898 | Biso | 1.000 | O  |
| O53  | 1.0000 | 0.78104 | 0.52024 | 0.96070 | Biso | 1.000 | O  |
| O54  | 1.0000 | 0.74450 | 0.80215 | 0.97082 | Biso | 1.000 | O  |
| P15  | 1.0000 | 0.38783 | 0.85787 | 0.18145 | Biso | 1.000 | P  |
| O55  | 1.0000 | 0.38971 | 0.96333 | 0.14532 | Biso | 1.000 | O  |
| AI16 | 1.0000 | 0.38553 | 0.85792 | 0.38912 | Biso | 1.000 | AI |
| P16  | 1.0000 | 0.49239 | 0.73639 | 0.84872 | Biso | 1.000 | P  |
| O56  | 1.0000 | 0.38254 | 0.63223 | 0.81993 | Biso | 1.000 | O  |
| O57  | 1.0000 | 0.26592 | 0.75868 | 0.17983 | Biso | 1.000 | O  |
| O58  | 1.0000 | 0.03596 | 0.98287 | 0.18441 | Biso | 1.000 | O  |
| O59  | 1.0000 | 0.17875 | 0.52345 | 0.13094 | Biso | 1.000 | O  |
| O60  | 1.0000 | 0.15287 | 0.52097 | 0.45582 | Biso | 1.000 | O  |
| O61  | 1.0000 | 0.03084 | 0.60926 | 0.14798 | Biso | 1.000 | O  |
| O62  | 1.0000 | 0.43455 | 0.87822 | 0.27780 | Biso | 1.000 | O  |
| O63  | 1.0000 | 0.13834 | 0.57859 | 0.30164 | Biso | 1.000 | O  |
| O64  | 1.0000 | 0.31811 | 0.93639 | 0.40849 | Biso | 1.000 | O  |
| P17  | 1.0000 | 0.16475 | 0.61920 | 0.39900 | Biso | 1.000 | P  |
| O65  | 1.0000 | 0.28573 | 0.71714 | 0.40745 | Biso | 1.000 | O  |
| O66  | 1.0000 | 0.38216 | 0.59743 | 0.08878 | Biso | 1.000 | O  |
| AI17 | 1.0000 | 0.25795 | 0.51822 | 0.85940 | Biso | 1.000 | AI |
| O67  | 1.0000 | 0.06753 | 0.94158 | 0.38662 | Biso | 1.000 | O  |
| O68  | 1.0000 | 0.46324 | 0.83403 | 0.12063 | Biso | 1.000 | O  |
| O69  | 1.0000 | 0.08218 | 0.65555 | 0.43389 | Biso | 1.000 | O  |
| AI18 | 1.0000 | 0.15471 | 0.61950 | 0.18933 | Biso | 1.000 | AI |
| O70  | 1.0000 | 0.23653 | 0.23128 | 0.94532 | Biso | 1.000 | O  |



|     |        |         |         |         |      |       |   |
|-----|--------|---------|---------|---------|------|-------|---|
| O71 | 1.0000 | 0.48364 | 0.25255 | 0.97361 | Biso | 1.000 | O |
| O72 | 1.0000 | 0.23333 | 0.54335 | 0.96977 | Biso | 1.000 | O |
| H1  | 1.0000 | 0.91942 | 0.74338 | 0.55803 | Biso | 1.000 | H |
| C1  | 1.0000 | 0.61368 | 0.53186 | 0.66436 | Biso | 1.000 | C |
| H2  | 1.0000 | 0.68428 | 0.57646 | 0.70943 | Biso | 1.000 | H |
| H3  | 1.0000 | 0.53844 | 0.50231 | 0.70413 | Biso | 1.000 | H |
| H4  | 1.0000 | 0.61924 | 0.46230 | 0.63599 | Biso | 1.000 | H |
| C2  | 1.0000 | 0.53916 | 0.54231 | 0.27699 | Biso | 1.000 | C |
| C3  | 1.0000 | 0.48081 | 0.42476 | 0.41662 | Biso | 1.000 | C |
| C4  | 1.0000 | 0.52779 | 0.35963 | 0.37175 | Biso | 1.000 | C |
| C5  | 1.0000 | 0.43045 | 0.39904 | 0.50130 | Biso | 1.000 | C |
| C6  | 1.0000 | 0.41110 | 0.29809 | 0.55435 | Biso | 1.000 | C |
| C7  | 1.0000 | 0.39944 | 0.47229 | 0.54044 | Biso | 1.000 | C |
| C8  | 1.0000 | 0.62552 | 0.61395 | 0.59619 | Biso | 1.000 | C |
| C9  | 1.0000 | 0.42397 | 0.57357 | 0.49866 | Biso | 1.000 | C |
| C10 | 1.0000 | 0.40163 | 0.65279 | 0.55220 | Biso | 1.000 | C |
| C11 | 1.0000 | 0.47073 | 0.59648 | 0.41281 | Biso | 1.000 | C |
| C12 | 1.0000 | 0.50504 | 0.70348 | 0.36319 | Biso | 1.000 | C |
| C13 | 1.0000 | 0.49379 | 0.51940 | 0.37082 | Biso | 1.000 | C |
| H5  | 1.0000 | 0.52371 | 0.46656 | 0.24291 | Biso | 1.000 | H |
| H6  | 1.0000 | 0.62981 | 0.60044 | 0.27603 | Biso | 1.000 | H |
| H7  | 1.0000 | 0.50108 | 0.58020 | 0.23715 | Biso | 1.000 | H |
| H8  | 1.0000 | 0.61157 | 0.41583 | 0.34570 | Biso | 1.000 | H |
| H9  | 1.0000 | 0.47648 | 0.31121 | 0.31550 | Biso | 1.000 | H |
| H10 | 1.0000 | 0.53525 | 0.30268 | 0.41614 | Biso | 1.000 | H |
| H11 | 1.0000 | 0.32211 | 0.23861 | 0.56287 | Biso | 1.000 | H |
| H12 | 1.0000 | 0.44660 | 0.32044 | 0.62094 | Biso | 1.000 | H |
| H13 | 1.0000 | 0.44635 | 0.25299 | 0.52245 | Biso | 1.000 | H |
| H14 | 1.0000 | 0.60246 | 0.67555 | 0.61555 | Biso | 1.000 | H |
| H15 | 1.0000 | 0.44622 | 0.67363 | 0.61560 | Biso | 1.000 | H |
| H16 | 1.0000 | 0.31334 | 0.61598 | 0.56897 | Biso | 1.000 | H |
| H17 | 1.0000 | 0.42622 | 0.73029 | 0.51845 | Biso | 1.000 | H |
| H18 | 1.0000 | 0.58780 | 0.73675 | 0.33328 | Biso | 1.000 | H |
| H19 | 1.0000 | 0.51010 | 0.76804 | 0.40634 | Biso | 1.000 | H |
| H20 | 1.0000 | 0.44705 | 0.69048 | 0.30901 | Biso | 1.000 | H |
| C14 | 1.0000 | 0.33900 | 0.44418 | 0.62845 | Biso | 1.000 | C |
| H21 | 1.0000 | 0.32595 | 0.36598 | 0.65571 | Biso | 1.000 | H |
| H22 | 1.0000 | 0.38316 | 0.50929 | 0.67818 | Biso | 1.000 | H |
| H23 | 1.0000 | 0.25736 | 0.43730 | 0.62046 | Biso | 1.000 | H |
| C15 | 1.0000 | 0.68835 | 0.63323 | 0.52093 | Biso | 1.000 | C |
| O73 | 1.0000 | 0.87786 | 0.72984 | 0.61608 | Biso | 1.000 | O |
| H24 | 1.0000 | 0.77770 | 0.68690 | 0.57637 | Biso | 1.000 | H |
| H25 | 1.0000 | 0.70463 | 0.56895 | 0.49638 | Biso | 1.000 | H |
| H26 | 1.0000 | 0.69665 | 0.69585 | 0.47369 | Biso | 1.000 | H |

H27 1.0000 0.89447 0.80314 0.63771 Biso 1.000 H

TS1-2 in TMB-based pathway

data\_image0

\_cell\_length\_a 13.8042  
 \_cell\_length\_b 13.8042  
 \_cell\_length\_c 15.044  
 \_cell\_angle\_alpha 90  
 \_cell\_angle\_beta 90  
 \_cell\_angle\_gamma 120

\_symmetry\_space\_group\_name\_H-M P 1

\_symmetry\_int\_tables\_number 1

loop\_

\_symmetry\_equiv\_pos\_as\_xyz  
 'x, y, z'

loop\_

\_atom\_site\_label  
 \_atom\_site\_occupancy  
 \_atom\_site\_fract\_x  
 \_atom\_site\_fract\_y  
 \_atom\_site\_fract\_z  
 \_atom\_site\_thermal\_displace\_type  
 \_atom\_site\_B\_iso\_or\_equiv  
 \_atom\_site\_type\_symbol

|     |        |         |         |         |      |       |    |
|-----|--------|---------|---------|---------|------|-------|----|
| P1  | 1.0000 | 0.05533 | 0.18081 | 0.53048 | Biso | 1.000 | P  |
| O1  | 1.0000 | 0.09029 | 0.30544 | 0.52328 | Biso | 1.000 | O  |
| O2  | 1.0000 | 0.29448 | 0.40065 | 0.82807 | Biso | 1.000 | O  |
| O3  | 1.0000 | 0.14600 | 0.48845 | 0.79910 | Biso | 1.000 | O  |
| Al1 | 1.0000 | 0.27064 | 0.28348 | 0.07242 | Biso | 1.000 | Al |
| O4  | 1.0000 | 0.16819 | 0.12255 | 0.28361 | Biso | 1.000 | O  |
| Al2 | 1.0000 | 0.04788 | 0.17542 | 0.73668 | Biso | 1.000 | Al |
| P2  | 1.0000 | 0.15744 | 0.07051 | 0.19034 | Biso | 1.000 | P  |
| Al3 | 1.0000 | 0.15690 | 0.07472 | 0.39567 | Biso | 1.000 | Al |
| O5  | 1.0000 | 0.08037 | 0.15656 | 0.62647 | Biso | 1.000 | O  |
| P3  | 1.0000 | 0.26476 | 0.28005 | 0.85494 | Biso | 1.000 | P  |
| O6  | 1.0000 | 0.35923 | 0.25937 | 0.82259 | Biso | 1.000 | O  |
| O7  | 1.0000 | 0.25007 | 0.03867 | 0.17702 | Biso | 1.000 | O  |
| O8  | 1.0000 | 0.48844 | 0.19401 | 0.13985 | Biso | 1.000 | O  |
| Al4 | 1.0000 | 0.05383 | 0.40890 | 0.53215 | Biso | 1.000 | Al |
| O9  | 1.0000 | 0.15480 | 0.19333 | 0.81004 | Biso | 1.000 | O  |
| P4  | 1.0000 | 0.25858 | 0.49929 | 0.07306 | Biso | 1.000 | P  |
| Al5 | 1.0000 | 0.38954 | 0.07347 | 0.19681 | Biso | 1.000 | Al |

|      |        |         |         |         |      |       |    |
|------|--------|---------|---------|---------|------|-------|----|
| O10  | 1.0000 | 0.25382 | 0.39385 | 0.11265 | Biso | 1.000 | O  |
| O11  | 1.0000 | 0.02281 | 0.28927 | 0.74229 | Biso | 1.000 | O  |
| O12  | 1.0000 | 0.42293 | 0.09974 | 0.31091 | Biso | 1.000 | O  |
| O13  | 1.0000 | 0.12720 | 0.16002 | 0.46433 | Biso | 1.000 | O  |
| O14  | 1.0000 | 0.07326 | 0.45745 | 0.64317 | Biso | 1.000 | O  |
| P5   | 1.0000 | 0.37761 | 0.07115 | 0.40733 | Biso | 1.000 | P  |
| O15  | 1.0000 | 0.29604 | 0.11312 | 0.42805 | Biso | 1.000 | O  |
| O16  | 1.0000 | 0.40933 | 0.31989 | 0.10187 | Biso | 1.000 | O  |
| P6   | 1.0000 | 0.04653 | 0.41156 | 0.73940 | Biso | 1.000 | P  |
| AI6  | 1.0000 | 0.48445 | 0.27566 | 0.86762 | Biso | 1.000 | AI |
| O17  | 1.0000 | 0.17048 | 0.15749 | 0.11970 | Biso | 1.000 | O  |
| AI7  | 1.0000 | 0.93173 | 0.61441 | 0.40299 | Biso | 1.000 | AI |
| P7   | 1.0000 | 0.71305 | 0.50816 | 0.85413 | Biso | 1.000 | P  |
| AI8  | 1.0000 | 0.58360 | 0.93538 | 0.73070 | Biso | 1.000 | AI |
| O18  | 1.0000 | 0.72324 | 0.62151 | 0.83073 | Biso | 1.000 | O  |
| O19  | 1.0000 | 0.96561 | 0.73340 | 0.16954 | Biso | 1.000 | O  |
| O20  | 1.0000 | 0.82214 | 0.82082 | 0.12238 | Biso | 1.000 | O  |
| O21  | 1.0000 | 0.56269 | 0.88529 | 0.61950 | Biso | 1.000 | O  |
| O22  | 1.0000 | 0.86084 | 0.87360 | 0.47334 | Biso | 1.000 | O  |
| O23  | 1.0000 | 0.88855 | 0.58255 | 0.29018 | Biso | 1.000 | O  |
| P8   | 1.0000 | 0.59835 | 0.94846 | 0.52909 | Biso | 1.000 | P  |
| O24  | 1.0000 | 0.69271 | 0.93601 | 0.48585 | Biso | 1.000 | O  |
| O25  | 1.0000 | 0.57197 | 0.70639 | 0.83574 | Biso | 1.000 | O  |
| O26  | 1.0000 | 0.80339 | 0.84517 | 0.78321 | Biso | 1.000 | O  |
| P9   | 1.0000 | 0.93001 | 0.61100 | 0.19290 | Biso | 1.000 | P  |
| AI9  | 1.0000 | 0.49104 | 0.73751 | 0.06761 | Biso | 1.000 | AI |
| Si1  | 1.0000 | 0.93098 | 0.83916 | 0.40618 | Biso | 1.000 | Si |
| O27  | 1.0000 | 0.91736 | 0.72186 | 0.44769 | Biso | 1.000 | O  |
| O28  | 1.0000 | 0.69644 | 0.62033 | 0.06786 | Biso | 1.000 | O  |
| O29  | 1.0000 | 0.49739 | 0.90064 | 0.46641 | Biso | 1.000 | O  |
| AI10 | 1.0000 | 0.71180 | 0.73957 | 0.85655 | Biso | 1.000 | AI |
| O30  | 1.0000 | 0.81549 | 0.93600 | 0.63867 | Biso | 1.000 | O  |
| O31  | 1.0000 | 0.83436 | 0.52883 | 0.13119 | Biso | 1.000 | O  |
| P10  | 1.0000 | 0.81668 | 0.95307 | 0.73972 | Biso | 1.000 | P  |
| AI11 | 1.0000 | 0.92621 | 0.83495 | 0.19889 | Biso | 1.000 | AI |
| AI12 | 1.0000 | 0.82706 | 0.96367 | 0.52236 | Biso | 1.000 | AI |
| O32  | 1.0000 | 0.87707 | 0.81672 | 0.30630 | Biso | 1.000 | O  |
| O33  | 1.0000 | 0.84052 | 0.49341 | 0.46445 | Biso | 1.000 | O  |
| O34  | 1.0000 | 0.48478 | 0.82612 | 0.79676 | Biso | 1.000 | O  |
| P11  | 1.0000 | 0.72262 | 0.74345 | 0.06370 | Biso | 1.000 | P  |
| O35  | 1.0000 | 0.61797 | 0.74594 | 0.09704 | Biso | 1.000 | O  |
| O36  | 1.0000 | 0.71960 | 0.97274 | 0.76794 | Biso | 1.000 | O  |
| O37  | 1.0000 | 0.82056 | 0.41750 | 0.61864 | Biso | 1.000 | O  |
| O38  | 1.0000 | 0.47800 | 0.13025 | 0.47111 | Biso | 1.000 | O  |

|      |        |         |         |         |      |       |    |
|------|--------|---------|---------|---------|------|-------|----|
| O39  | 1.0000 | 0.64165 | 0.07448 | 0.54683 | Biso | 1.000 | O  |
| P12  | 1.0000 | 0.82159 | 0.39137 | 0.51875 | Biso | 1.000 | P  |
| O40  | 1.0000 | 0.70669 | 0.29267 | 0.49120 | Biso | 1.000 | O  |
| O41  | 1.0000 | 0.58654 | 0.41922 | 0.85921 | Biso | 1.000 | O  |
| O42  | 1.0000 | 0.52013 | 0.18866 | 0.80921 | Biso | 1.000 | O  |
| AI13 | 1.0000 | 0.73132 | 0.51431 | 0.05621 | Biso | 1.000 | AI |
| O43  | 1.0000 | 0.92837 | 0.10841 | 0.50964 | Biso | 1.000 | O  |
| AI14 | 1.0000 | 0.81410 | 0.39026 | 0.73335 | Biso | 1.000 | AI |
| O44  | 1.0000 | 0.91354 | 0.36066 | 0.49975 | Biso | 1.000 | O  |
| P13  | 1.0000 | 0.58989 | 0.17054 | 0.73862 | Biso | 1.000 | P  |
| O45  | 1.0000 | 0.55841 | 0.04702 | 0.74299 | Biso | 1.000 | O  |
| AI15 | 1.0000 | 0.59506 | 0.17182 | 0.53757 | Biso | 1.000 | AI |
| O46  | 1.0000 | 0.92725 | 0.05340 | 0.77213 | Biso | 1.000 | O  |
| O47  | 1.0000 | 0.77056 | 0.47877 | 0.77988 | Biso | 1.000 | O  |
| P14  | 1.0000 | 0.49500 | 0.28333 | 0.07495 | Biso | 1.000 | P  |
| O48  | 1.0000 | 0.61352 | 0.38473 | 0.08061 | Biso | 1.000 | O  |
| O49  | 1.0000 | 0.71709 | 0.24728 | 0.75675 | Biso | 1.000 | O  |
| O50  | 1.0000 | 0.94348 | 0.41560 | 0.77493 | Biso | 1.000 | O  |
| O51  | 1.0000 | 0.56153 | 0.19909 | 0.64539 | Biso | 1.000 | O  |
| O52  | 1.0000 | 0.49998 | 0.78459 | 0.95683 | Biso | 1.000 | O  |
| O53  | 1.0000 | 0.77113 | 0.51416 | 0.94395 | Biso | 1.000 | O  |
| O54  | 1.0000 | 0.74990 | 0.78609 | 0.96645 | Biso | 1.000 | O  |
| P15  | 1.0000 | 0.38714 | 0.84875 | 0.19088 | Biso | 1.000 | P  |
| O55  | 1.0000 | 0.40834 | 0.96351 | 0.15813 | Biso | 1.000 | O  |
| AI16 | 1.0000 | 0.37459 | 0.85314 | 0.40451 | Biso | 1.000 | AI |
| P16  | 1.0000 | 0.48168 | 0.73774 | 0.86091 | Biso | 1.000 | P  |
| O56  | 1.0000 | 0.36627 | 0.63306 | 0.85111 | Biso | 1.000 | O  |
| O57  | 1.0000 | 0.26429 | 0.75929 | 0.16922 | Biso | 1.000 | O  |
| O58  | 1.0000 | 0.04288 | 0.96650 | 0.17539 | Biso | 1.000 | O  |
| O59  | 1.0000 | 0.18238 | 0.52657 | 0.12884 | Biso | 1.000 | O  |
| O60  | 1.0000 | 0.14832 | 0.51626 | 0.46281 | Biso | 1.000 | O  |
| O61  | 1.0000 | 0.02936 | 0.59171 | 0.17754 | Biso | 1.000 | O  |
| O62  | 1.0000 | 0.40908 | 0.85170 | 0.29192 | Biso | 1.000 | O  |
| O63  | 1.0000 | 0.18645 | 0.59354 | 0.30830 | Biso | 1.000 | O  |
| O64  | 1.0000 | 0.31892 | 0.94251 | 0.42105 | Biso | 1.000 | O  |
| P17  | 1.0000 | 0.16880 | 0.61729 | 0.40589 | Biso | 1.000 | P  |
| O65  | 1.0000 | 0.27659 | 0.71912 | 0.44211 | Biso | 1.000 | O  |
| O66  | 1.0000 | 0.38173 | 0.59664 | 0.07457 | Biso | 1.000 | O  |
| AI17 | 1.0000 | 0.25486 | 0.49808 | 0.86473 | Biso | 1.000 | AI |
| O67  | 1.0000 | 0.06397 | 0.93365 | 0.40350 | Biso | 1.000 | O  |
| O68  | 1.0000 | 0.46974 | 0.82199 | 0.14287 | Biso | 1.000 | O  |
| O69  | 1.0000 | 0.07129 | 0.64136 | 0.41229 | Biso | 1.000 | O  |
| AI18 | 1.0000 | 0.16509 | 0.61932 | 0.19701 | Biso | 1.000 | AI |
| O70  | 1.0000 | 0.25157 | 0.26671 | 0.95655 | Biso | 1.000 | O  |

|     |        |         |         |         |      |       |   |
|-----|--------|---------|---------|---------|------|-------|---|
| O71 | 1.0000 | 0.46825 | 0.23342 | 0.97977 | Biso | 1.000 | O |
| O72 | 1.0000 | 0.21292 | 0.47483 | 0.97674 | Biso | 1.000 | O |
| H1  | 1.0000 | 0.87110 | 0.70697 | 0.56236 | Biso | 1.000 | H |
| C1  | 1.0000 | 0.66185 | 0.58698 | 0.58054 | Biso | 1.000 | C |
| O73 | 1.0000 | 0.83475 | 0.68800 | 0.62167 | Biso | 1.000 | O |
| H2  | 1.0000 | 0.63817 | 0.63539 | 0.62204 | Biso | 1.000 | H |
| H3  | 1.0000 | 0.66718 | 0.51878 | 0.60994 | Biso | 1.000 | H |
| H4  | 1.0000 | 0.69152 | 0.61440 | 0.51411 | Biso | 1.000 | H |
| H5  | 1.0000 | 0.84315 | 0.75792 | 0.64406 | Biso | 1.000 | H |
| C2  | 1.0000 | 0.58678 | 0.37266 | 0.34055 | Biso | 1.000 | C |
| C3  | 1.0000 | 0.51681 | 0.41322 | 0.48327 | Biso | 1.000 | C |
| H6  | 1.0000 | 0.51479 | 0.34113 | 0.51366 | Biso | 1.000 | H |
| C4  | 1.0000 | 0.48430 | 0.47750 | 0.53602 | Biso | 1.000 | C |
| C5  | 1.0000 | 0.42452 | 0.43174 | 0.62333 | Biso | 1.000 | C |
| C6  | 1.0000 | 0.47873 | 0.56639 | 0.49353 | Biso | 1.000 | C |
| H7  | 1.0000 | 0.44847 | 0.61316 | 0.53120 | Biso | 1.000 | H |
| C7  | 1.0000 | 0.51143 | 0.59472 | 0.40578 | Biso | 1.000 | C |
| C8  | 1.0000 | 0.50286 | 0.68775 | 0.36205 | Biso | 1.000 | C |
| C9  | 1.0000 | 0.55037 | 0.53341 | 0.35702 | Biso | 1.000 | C |
| C10 | 1.0000 | 0.58885 | 0.56683 | 0.26329 | Biso | 1.000 | C |
| C11 | 1.0000 | 0.55135 | 0.44069 | 0.39550 | Biso | 1.000 | C |
| H8  | 1.0000 | 0.53543 | 0.34173 | 0.28092 | Biso | 1.000 | H |
| H9  | 1.0000 | 0.57915 | 0.30183 | 0.37700 | Biso | 1.000 | H |
| H10 | 1.0000 | 0.67365 | 0.42254 | 0.31902 | Biso | 1.000 | H |
| H11 | 1.0000 | 0.43283 | 0.49790 | 0.66790 | Biso | 1.000 | H |
| H12 | 1.0000 | 0.45470 | 0.38236 | 0.65773 | Biso | 1.000 | H |
| H13 | 1.0000 | 0.33522 | 0.37650 | 0.61054 | Biso | 1.000 | H |
| H14 | 1.0000 | 0.45226 | 0.65849 | 0.30167 | Biso | 1.000 | H |
| H15 | 1.0000 | 0.58473 | 0.75773 | 0.34355 | Biso | 1.000 | H |
| H16 | 1.0000 | 0.46372 | 0.71857 | 0.40744 | Biso | 1.000 | H |
| H17 | 1.0000 | 0.64499 | 0.53752 | 0.24256 | Biso | 1.000 | H |
| H18 | 1.0000 | 0.63180 | 0.65719 | 0.25567 | Biso | 1.000 | H |
| H19 | 1.0000 | 0.51760 | 0.53109 | 0.21733 | Biso | 1.000 | H |

TS2-3 in TMB-based pathway

data\_image0

\_cell\_length\_a 13.8042  
 \_cell\_length\_b 13.8042  
 \_cell\_length\_c 15.044  
 \_cell\_angle\_alpha 90  
 \_cell\_angle\_beta 90  
 \_cell\_angle\_gamma 120

\_symmetry\_space\_group\_name\_H-M P 1  
 \_symmetry\_int\_tables\_number 1

loop\_

\_symmetry\_equiv\_pos\_as\_xyz  
 'x, y, z'

loop\_

\_atom\_site\_label  
 \_atom\_site\_occupancy  
 \_atom\_site\_fract\_x  
 \_atom\_site\_fract\_y  
 \_atom\_site\_fract\_z  
 \_atom\_site\_thermal\_displace\_type  
 \_atom\_site\_B\_iso\_or\_equiv  
 \_atom\_site\_type\_symbol

|     |        |         |         |         |      |       |    |
|-----|--------|---------|---------|---------|------|-------|----|
| P1  | 1.0000 | 0.04821 | 0.17276 | 0.51989 | Biso | 1.000 | P  |
| O1  | 1.0000 | 0.06599 | 0.28434 | 0.48089 | Biso | 1.000 | O  |
| O2  | 1.0000 | 0.29198 | 0.39642 | 0.83346 | Biso | 1.000 | O  |
| O3  | 1.0000 | 0.15088 | 0.48714 | 0.78500 | Biso | 1.000 | O  |
| Al1 | 1.0000 | 0.26438 | 0.27306 | 0.06294 | Biso | 1.000 | Al |
| O4  | 1.0000 | 0.16809 | 0.10158 | 0.28324 | Biso | 1.000 | O  |
| Al2 | 1.0000 | 0.05628 | 0.17905 | 0.72441 | Biso | 1.000 | Al |
| P2  | 1.0000 | 0.15548 | 0.06238 | 0.18539 | Biso | 1.000 | P  |
| Al3 | 1.0000 | 0.14591 | 0.04701 | 0.39377 | Biso | 1.000 | Al |
| O5  | 1.0000 | 0.10410 | 0.19491 | 0.61335 | Biso | 1.000 | O  |
| P3  | 1.0000 | 0.26510 | 0.27432 | 0.84933 | Biso | 1.000 | P  |
| O6  | 1.0000 | 0.36624 | 0.26478 | 0.81698 | Biso | 1.000 | O  |
| O7  | 1.0000 | 0.24779 | 0.03298 | 0.16115 | Biso | 1.000 | O  |
| O8  | 1.0000 | 0.48524 | 0.18347 | 0.12611 | Biso | 1.000 | O  |
| Al4 | 1.0000 | 0.04141 | 0.39106 | 0.51836 | Biso | 1.000 | Al |
| O9  | 1.0000 | 0.16280 | 0.19097 | 0.79479 | Biso | 1.000 | O  |
| P4  | 1.0000 | 0.26192 | 0.49998 | 0.06215 | Biso | 1.000 | P  |
| Al5 | 1.0000 | 0.38628 | 0.07146 | 0.19046 | Biso | 1.000 | Al |

|      |        |         |         |         |      |       |    |
|------|--------|---------|---------|---------|------|-------|----|
| O10  | 1.0000 | 0.24736 | 0.38690 | 0.09204 | Biso | 1.000 | O  |
| O11  | 1.0000 | 0.01774 | 0.27989 | 0.75357 | Biso | 1.000 | O  |
| O12  | 1.0000 | 0.41101 | 0.11809 | 0.30202 | Biso | 1.000 | O  |
| O13  | 1.0000 | 0.10361 | 0.12693 | 0.45789 | Biso | 1.000 | O  |
| O14  | 1.0000 | 0.07839 | 0.42526 | 0.63118 | Biso | 1.000 | O  |
| P5   | 1.0000 | 0.37476 | 0.06336 | 0.39506 | Biso | 1.000 | P  |
| O15  | 1.0000 | 0.28110 | 0.08059 | 0.43377 | Biso | 1.000 | O  |
| O16  | 1.0000 | 0.40383 | 0.30831 | 0.08816 | Biso | 1.000 | O  |
| P6   | 1.0000 | 0.04868 | 0.40194 | 0.73082 | Biso | 1.000 | P  |
| Al6  | 1.0000 | 0.49305 | 0.28235 | 0.85813 | Biso | 1.000 | Al |
| O17  | 1.0000 | 0.16725 | 0.15856 | 0.12509 | Biso | 1.000 | O  |
| Al7  | 1.0000 | 0.92723 | 0.60841 | 0.39443 | Biso | 1.000 | Al |
| P7   | 1.0000 | 0.71956 | 0.51299 | 0.85348 | Biso | 1.000 | P  |
| Al8  | 1.0000 | 0.59907 | 0.94790 | 0.73396 | Biso | 1.000 | Al |
| O18  | 1.0000 | 0.73495 | 0.62390 | 0.81579 | Biso | 1.000 | O  |
| O19  | 1.0000 | 0.95643 | 0.72596 | 0.15020 | Biso | 1.000 | O  |
| O20  | 1.0000 | 0.82072 | 0.82320 | 0.11340 | Biso | 1.000 | O  |
| O21  | 1.0000 | 0.57187 | 0.92326 | 0.61960 | Biso | 1.000 | O  |
| O22  | 1.0000 | 0.85799 | 0.86879 | 0.46123 | Biso | 1.000 | O  |
| O23  | 1.0000 | 0.91453 | 0.59040 | 0.27838 | Biso | 1.000 | O  |
| P8   | 1.0000 | 0.60067 | 0.94912 | 0.51983 | Biso | 1.000 | P  |
| O24  | 1.0000 | 0.68702 | 0.91635 | 0.49047 | Biso | 1.000 | O  |
| O25  | 1.0000 | 0.58028 | 0.70600 | 0.82056 | Biso | 1.000 | O  |
| O26  | 1.0000 | 0.81923 | 0.85380 | 0.79897 | Biso | 1.000 | O  |
| P9   | 1.0000 | 0.93363 | 0.60838 | 0.17743 | Biso | 1.000 | P  |
| Al9  | 1.0000 | 0.49042 | 0.73113 | 0.05765 | Biso | 1.000 | Al |
| Si1  | 1.0000 | 0.91882 | 0.82215 | 0.39633 | Biso | 1.000 | Si |
| O27  | 1.0000 | 0.88570 | 0.69811 | 0.43927 | Biso | 1.000 | O  |
| O28  | 1.0000 | 0.68935 | 0.61263 | 0.09205 | Biso | 1.000 | O  |
| O29  | 1.0000 | 0.49197 | 0.88020 | 0.46672 | Biso | 1.000 | O  |
| Al10 | 1.0000 | 0.71533 | 0.73376 | 0.85304 | Biso | 1.000 | Al |
| O30  | 1.0000 | 0.80344 | 0.89119 | 0.63773 | Biso | 1.000 | O  |
| O31  | 1.0000 | 0.82902 | 0.51603 | 0.12933 | Biso | 1.000 | O  |
| P10  | 1.0000 | 0.82509 | 0.94225 | 0.73327 | Biso | 1.000 | P  |
| Al11 | 1.0000 | 0.92266 | 0.82858 | 0.18798 | Biso | 1.000 | Al |
| Al12 | 1.0000 | 0.82137 | 0.94568 | 0.52544 | Biso | 1.000 | Al |
| O32  | 1.0000 | 0.87145 | 0.80447 | 0.29493 | Biso | 1.000 | O  |
| O33  | 1.0000 | 0.83716 | 0.47545 | 0.44004 | Biso | 1.000 | O  |
| O34  | 1.0000 | 0.49558 | 0.82789 | 0.78826 | Biso | 1.000 | O  |
| P11  | 1.0000 | 0.71369 | 0.73259 | 0.06915 | Biso | 1.000 | P  |
| O35  | 1.0000 | 0.61398 | 0.74453 | 0.10196 | Biso | 1.000 | O  |
| O36  | 1.0000 | 0.73639 | 0.97566 | 0.75714 | Biso | 1.000 | O  |
| O37  | 1.0000 | 0.83370 | 0.45172 | 0.60758 | Biso | 1.000 | O  |
| O38  | 1.0000 | 0.47706 | 0.12181 | 0.45627 | Biso | 1.000 | O  |



|      |        |         |         |         |      |       |    |
|------|--------|---------|---------|---------|------|-------|----|
| O39  | 1.0000 | 0.65079 | 0.07618 | 0.50312 | Biso | 1.000 | O  |
| P12  | 1.0000 | 0.81638 | 0.39297 | 0.51552 | Biso | 1.000 | P  |
| O40  | 1.0000 | 0.69361 | 0.29909 | 0.50668 | Biso | 1.000 | O  |
| O41  | 1.0000 | 0.59206 | 0.42745 | 0.85817 | Biso | 1.000 | O  |
| O42  | 1.0000 | 0.53813 | 0.21199 | 0.78856 | Biso | 1.000 | O  |
| AI13 | 1.0000 | 0.72521 | 0.51118 | 0.05984 | Biso | 1.000 | AI |
| O43  | 1.0000 | 0.92004 | 0.09124 | 0.53015 | Biso | 1.000 | O  |
| AI14 | 1.0000 | 0.82179 | 0.40156 | 0.71824 | Biso | 1.000 | AI |
| O44  | 1.0000 | 0.89646 | 0.34462 | 0.50720 | Biso | 1.000 | O  |
| P13  | 1.0000 | 0.59753 | 0.16778 | 0.72897 | Biso | 1.000 | P  |
| O45  | 1.0000 | 0.58811 | 0.06232 | 0.77273 | Biso | 1.000 | O  |
| AI15 | 1.0000 | 0.59106 | 0.16049 | 0.52574 | Biso | 1.000 | AI |
| O46  | 1.0000 | 0.94226 | 0.04482 | 0.74027 | Biso | 1.000 | O  |
| O47  | 1.0000 | 0.77874 | 0.47200 | 0.79010 | Biso | 1.000 | O  |
| P14  | 1.0000 | 0.49252 | 0.27483 | 0.06340 | Biso | 1.000 | P  |
| O48  | 1.0000 | 0.60943 | 0.37761 | 0.07289 | Biso | 1.000 | O  |
| O49  | 1.0000 | 0.72310 | 0.25645 | 0.71756 | Biso | 1.000 | O  |
| O50  | 1.0000 | 0.94979 | 0.41897 | 0.75582 | Biso | 1.000 | O  |
| O51  | 1.0000 | 0.54015 | 0.13822 | 0.63651 | Biso | 1.000 | O  |
| O52  | 1.0000 | 0.50964 | 0.77820 | 0.94627 | Biso | 1.000 | O  |
| O53  | 1.0000 | 0.77155 | 0.53132 | 0.94743 | Biso | 1.000 | O  |
| O54  | 1.0000 | 0.72769 | 0.75039 | 0.96751 | Biso | 1.000 | O  |
| P15  | 1.0000 | 0.38865 | 0.84166 | 0.18882 | Biso | 1.000 | P  |
| O55  | 1.0000 | 0.41467 | 0.96235 | 0.17320 | Biso | 1.000 | O  |
| AI16 | 1.0000 | 0.38274 | 0.84059 | 0.39079 | Biso | 1.000 | AI |
| P16  | 1.0000 | 0.48964 | 0.73534 | 0.84929 | Biso | 1.000 | P  |
| O56  | 1.0000 | 0.37359 | 0.63143 | 0.83767 | Biso | 1.000 | O  |
| O57  | 1.0000 | 0.26063 | 0.76159 | 0.17976 | Biso | 1.000 | O  |
| O58  | 1.0000 | 0.04066 | 0.96028 | 0.16712 | Biso | 1.000 | O  |
| O59  | 1.0000 | 0.20165 | 0.53483 | 0.12959 | Biso | 1.000 | O  |
| O60  | 1.0000 | 0.13206 | 0.51154 | 0.45860 | Biso | 1.000 | O  |
| O61  | 1.0000 | 0.03343 | 0.59475 | 0.14771 | Biso | 1.000 | O  |
| O62  | 1.0000 | 0.42843 | 0.82928 | 0.28284 | Biso | 1.000 | O  |
| O63  | 1.0000 | 0.14919 | 0.57756 | 0.30233 | Biso | 1.000 | O  |
| O64  | 1.0000 | 0.33317 | 0.93621 | 0.38810 | Biso | 1.000 | O  |
| P17  | 1.0000 | 0.15443 | 0.61278 | 0.40080 | Biso | 1.000 | P  |
| O65  | 1.0000 | 0.27289 | 0.70919 | 0.42404 | Biso | 1.000 | O  |
| O66  | 1.0000 | 0.38894 | 0.58703 | 0.05946 | Biso | 1.000 | O  |
| AI17 | 1.0000 | 0.25612 | 0.50013 | 0.85737 | Biso | 1.000 | AI |
| O67  | 1.0000 | 0.05491 | 0.90457 | 0.39691 | Biso | 1.000 | O  |
| O68  | 1.0000 | 0.45241 | 0.81438 | 0.11869 | Biso | 1.000 | O  |
| O69  | 1.0000 | 0.06892 | 0.65107 | 0.42102 | Biso | 1.000 | O  |
| AI18 | 1.0000 | 0.16097 | 0.61726 | 0.18962 | Biso | 1.000 | AI |
| O70  | 1.0000 | 0.24003 | 0.24290 | 0.94847 | Biso | 1.000 | O  |

|     |        |         |         |         |      |       |   |
|-----|--------|---------|---------|---------|------|-------|---|
| O71 | 1.0000 | 0.47327 | 0.22879 | 0.96694 | Biso | 1.000 | O |
| O72 | 1.0000 | 0.21000 | 0.48941 | 0.96855 | Biso | 1.000 | O |
| H1  | 1.0000 | 0.80192 | 0.66800 | 0.53014 | Biso | 1.000 | H |
| H2  | 1.0000 | 0.66875 | 0.60852 | 0.60125 | Biso | 1.000 | H |
| O73 | 1.0000 | 0.76796 | 0.66369 | 0.59092 | Biso | 1.000 | O |
| H3  | 1.0000 | 0.79009 | 0.74070 | 0.60783 | Biso | 1.000 | H |
| C1  | 1.0000 | 0.34477 | 0.42919 | 0.31075 | Biso | 1.000 | C |
| H4  | 1.0000 | 0.35888 | 0.37499 | 0.26631 | Biso | 1.000 | H |
| H5  | 1.0000 | 0.26592 | 0.37842 | 0.34596 | Biso | 1.000 | H |
| H6  | 1.0000 | 0.33724 | 0.49097 | 0.27068 | Biso | 1.000 | H |
| C2  | 1.0000 | 0.55439 | 0.55815 | 0.32239 | Biso | 1.000 | C |
| C3  | 1.0000 | 0.45138 | 0.40079 | 0.42998 | Biso | 1.000 | C |
| H7  | 1.0000 | 0.44215 | 0.32868 | 0.39359 | Biso | 1.000 | H |
| C4  | 1.0000 | 0.46821 | 0.40797 | 0.51867 | Biso | 1.000 | C |
| C5  | 1.0000 | 0.46484 | 0.31651 | 0.57481 | Biso | 1.000 | C |
| C6  | 1.0000 | 0.48974 | 0.51038 | 0.56359 | Biso | 1.000 | C |
| C7  | 1.0000 | 0.55465 | 0.54624 | 0.64008 | Biso | 1.000 | C |
| C8  | 1.0000 | 0.44326 | 0.57450 | 0.52349 | Biso | 1.000 | C |
| C9  | 1.0000 | 0.41488 | 0.64366 | 0.58382 | Biso | 1.000 | C |
| C10 | 1.0000 | 0.42517 | 0.56506 | 0.43494 | Biso | 1.000 | C |
| H8  | 1.0000 | 0.39520 | 0.61498 | 0.40221 | Biso | 1.000 | H |
| C11 | 1.0000 | 0.44407 | 0.48832 | 0.37645 | Biso | 1.000 | C |
| H9  | 1.0000 | 0.56871 | 0.50335 | 0.27859 | Biso | 1.000 | H |
| H10 | 1.0000 | 0.62626 | 0.60179 | 0.36661 | Biso | 1.000 | H |
| H11 | 1.0000 | 0.54854 | 0.62048 | 0.28150 | Biso | 1.000 | H |
| H12 | 1.0000 | 0.54799 | 0.33790 | 0.59830 | Biso | 1.000 | H |
| H13 | 1.0000 | 0.42926 | 0.23882 | 0.53802 | Biso | 1.000 | H |
| H14 | 1.0000 | 0.41279 | 0.30248 | 0.63355 | Biso | 1.000 | H |
| H15 | 1.0000 | 0.55549 | 0.61198 | 0.67967 | Biso | 1.000 | H |
| H16 | 1.0000 | 0.56982 | 0.48783 | 0.67704 | Biso | 1.000 | H |
| H17 | 1.0000 | 0.37028 | 0.67783 | 0.54851 | Biso | 1.000 | H |
| H18 | 1.0000 | 0.48899 | 0.71254 | 0.61404 | Biso | 1.000 | H |
| H19 | 1.0000 | 0.36142 | 0.59159 | 0.63808 | Biso | 1.000 | H |

TS3-4 in TMB-based pathway

data\_image0

\_cell\_length\_a 13.8042  
 \_cell\_length\_b 13.8042  
 \_cell\_length\_c 15.044  
 \_cell\_angle\_alpha 90  
 \_cell\_angle\_beta 90  
 \_cell\_angle\_gamma 120

\_symmetry\_space\_group\_name\_H-M P 1  
 \_symmetry\_int\_tables\_number 1

loop\_

\_symmetry\_equiv\_pos\_as\_xyz  
 'x, y, z'

loop\_

\_atom\_site\_label  
 \_atom\_site\_occupancy  
 \_atom\_site\_fract\_x  
 \_atom\_site\_fract\_y  
 \_atom\_site\_fract\_z  
 \_atom\_site\_thermal\_displace\_type  
 \_atom\_site\_B\_iso\_or\_equiv  
 \_atom\_site\_type\_symbol

|     |        |         |         |         |      |       |    |
|-----|--------|---------|---------|---------|------|-------|----|
| P1  | 1.0000 | 0.04672 | 0.16650 | 0.51953 | Biso | 1.000 | P  |
| O1  | 1.0000 | 0.08026 | 0.28889 | 0.49897 | Biso | 1.000 | O  |
| O2  | 1.0000 | 0.27178 | 0.38388 | 0.84883 | Biso | 1.000 | O  |
| O3  | 1.0000 | 0.14589 | 0.48930 | 0.79033 | Biso | 1.000 | O  |
| Al1 | 1.0000 | 0.25455 | 0.26335 | 0.06149 | Biso | 1.000 | Al |
| O4  | 1.0000 | 0.17372 | 0.10389 | 0.28540 | Biso | 1.000 | O  |
| Al2 | 1.0000 | 0.05209 | 0.17195 | 0.72770 | Biso | 1.000 | Al |
| P2  | 1.0000 | 0.15473 | 0.06029 | 0.18867 | Biso | 1.000 | P  |
| Al3 | 1.0000 | 0.15096 | 0.04851 | 0.39552 | Biso | 1.000 | Al |
| O5  | 1.0000 | 0.08102 | 0.15720 | 0.61625 | Biso | 1.000 | O  |
| P3  | 1.0000 | 0.25833 | 0.26590 | 0.85337 | Biso | 1.000 | P  |
| O6  | 1.0000 | 0.36828 | 0.27381 | 0.82115 | Biso | 1.000 | O  |
| O7  | 1.0000 | 0.24754 | 0.03292 | 0.16123 | Biso | 1.000 | O  |
| O8  | 1.0000 | 0.48355 | 0.18478 | 0.12875 | Biso | 1.000 | O  |
| Al4 | 1.0000 | 0.04772 | 0.39394 | 0.52154 | Biso | 1.000 | Al |
| O9  | 1.0000 | 0.16422 | 0.18457 | 0.79115 | Biso | 1.000 | O  |
| P4  | 1.0000 | 0.25526 | 0.49683 | 0.06647 | Biso | 1.000 | P  |
| Al5 | 1.0000 | 0.38544 | 0.06994 | 0.19133 | Biso | 1.000 | Al |

|      |        |         |         |         |      |       |    |
|------|--------|---------|---------|---------|------|-------|----|
| O10  | 1.0000 | 0.23364 | 0.37721 | 0.07881 | Biso | 1.000 | O  |
| O11  | 1.0000 | 0.02929 | 0.28567 | 0.74327 | Biso | 1.000 | O  |
| O12  | 1.0000 | 0.41264 | 0.11396 | 0.30357 | Biso | 1.000 | O  |
| O13  | 1.0000 | 0.11103 | 0.13222 | 0.45620 | Biso | 1.000 | O  |
| O14  | 1.0000 | 0.08311 | 0.44335 | 0.63219 | Biso | 1.000 | O  |
| P5   | 1.0000 | 0.37472 | 0.05642 | 0.39553 | Biso | 1.000 | P  |
| O15  | 1.0000 | 0.28531 | 0.07879 | 0.43622 | Biso | 1.000 | O  |
| O16  | 1.0000 | 0.39409 | 0.30274 | 0.08962 | Biso | 1.000 | O  |
| P6   | 1.0000 | 0.05029 | 0.40585 | 0.72980 | Biso | 1.000 | P  |
| AI6  | 1.0000 | 0.49091 | 0.27857 | 0.85900 | Biso | 1.000 | AI |
| O17  | 1.0000 | 0.15949 | 0.15281 | 0.12766 | Biso | 1.000 | O  |
| AI7  | 1.0000 | 0.93005 | 0.60442 | 0.39874 | Biso | 1.000 | AI |
| P7   | 1.0000 | 0.72456 | 0.50796 | 0.85677 | Biso | 1.000 | P  |
| AI8  | 1.0000 | 0.58826 | 0.93511 | 0.73483 | Biso | 1.000 | AI |
| O18  | 1.0000 | 0.73805 | 0.62417 | 0.83986 | Biso | 1.000 | O  |
| O19  | 1.0000 | 0.95183 | 0.72287 | 0.15411 | Biso | 1.000 | O  |
| O20  | 1.0000 | 0.81817 | 0.82412 | 0.12227 | Biso | 1.000 | O  |
| O21  | 1.0000 | 0.55899 | 0.90377 | 0.62085 | Biso | 1.000 | O  |
| O22  | 1.0000 | 0.86154 | 0.86397 | 0.46943 | Biso | 1.000 | O  |
| O23  | 1.0000 | 0.92228 | 0.59027 | 0.28241 | Biso | 1.000 | O  |
| P8   | 1.0000 | 0.59660 | 0.93710 | 0.52300 | Biso | 1.000 | P  |
| O24  | 1.0000 | 0.68238 | 0.90263 | 0.49517 | Biso | 1.000 | O  |
| O25  | 1.0000 | 0.58337 | 0.70459 | 0.82293 | Biso | 1.000 | O  |
| O26  | 1.0000 | 0.81935 | 0.84678 | 0.79159 | Biso | 1.000 | O  |
| P9   | 1.0000 | 0.93181 | 0.60621 | 0.18091 | Biso | 1.000 | P  |
| AI9  | 1.0000 | 0.48620 | 0.72301 | 0.06297 | Biso | 1.000 | AI |
| Si1  | 1.0000 | 0.92248 | 0.82081 | 0.40126 | Biso | 1.000 | Si |
| O27  | 1.0000 | 0.89663 | 0.69926 | 0.44353 | Biso | 1.000 | O  |
| O28  | 1.0000 | 0.69920 | 0.62004 | 0.07241 | Biso | 1.000 | O  |
| O29  | 1.0000 | 0.49293 | 0.87726 | 0.46287 | Biso | 1.000 | O  |
| AI10 | 1.0000 | 0.71941 | 0.73912 | 0.85897 | Biso | 1.000 | AI |
| O30  | 1.0000 | 0.82302 | 0.91770 | 0.63941 | Biso | 1.000 | O  |
| O31  | 1.0000 | 0.82267 | 0.51333 | 0.13806 | Biso | 1.000 | O  |
| P10  | 1.0000 | 0.82393 | 0.94534 | 0.73900 | Biso | 1.000 | P  |
| AI11 | 1.0000 | 0.92007 | 0.82581 | 0.19466 | Biso | 1.000 | AI |
| AI12 | 1.0000 | 0.82338 | 0.94712 | 0.52344 | Biso | 1.000 | AI |
| O32  | 1.0000 | 0.86945 | 0.80028 | 0.30164 | Biso | 1.000 | O  |
| O33  | 1.0000 | 0.83544 | 0.47145 | 0.44245 | Biso | 1.000 | O  |
| O34  | 1.0000 | 0.48746 | 0.81817 | 0.79386 | Biso | 1.000 | O  |
| P11  | 1.0000 | 0.71751 | 0.74023 | 0.06772 | Biso | 1.000 | P  |
| O35  | 1.0000 | 0.61124 | 0.73702 | 0.10425 | Biso | 1.000 | O  |
| O36  | 1.0000 | 0.72279 | 0.95974 | 0.76280 | Biso | 1.000 | O  |
| O37  | 1.0000 | 0.82293 | 0.43582 | 0.60817 | Biso | 1.000 | O  |
| O38  | 1.0000 | 0.47785 | 0.10553 | 0.45641 | Biso | 1.000 | O  |

|      |        |         |         |         |      |       |    |
|------|--------|---------|---------|---------|------|-------|----|
| O39  | 1.0000 | 0.65266 | 0.06608 | 0.51394 | Biso | 1.000 | O  |
| P12  | 1.0000 | 0.81588 | 0.38495 | 0.51425 | Biso | 1.000 | P  |
| O40  | 1.0000 | 0.69654 | 0.28688 | 0.49859 | Biso | 1.000 | O  |
| O41  | 1.0000 | 0.59859 | 0.41952 | 0.84671 | Biso | 1.000 | O  |
| O42  | 1.0000 | 0.51356 | 0.18815 | 0.79200 | Biso | 1.000 | O  |
| AI13 | 1.0000 | 0.72489 | 0.50782 | 0.06138 | Biso | 1.000 | AI |
| O43  | 1.0000 | 0.91759 | 0.09297 | 0.50879 | Biso | 1.000 | O  |
| AI14 | 1.0000 | 0.81786 | 0.39758 | 0.72127 | Biso | 1.000 | AI |
| O44  | 1.0000 | 0.90243 | 0.34440 | 0.50692 | Biso | 1.000 | O  |
| P13  | 1.0000 | 0.58819 | 0.16081 | 0.73357 | Biso | 1.000 | P  |
| O45  | 1.0000 | 0.58073 | 0.05270 | 0.76942 | Biso | 1.000 | O  |
| AI15 | 1.0000 | 0.59258 | 0.15200 | 0.52661 | Biso | 1.000 | AI |
| O46  | 1.0000 | 0.93115 | 0.05300 | 0.76566 | Biso | 1.000 | O  |
| O47  | 1.0000 | 0.79363 | 0.48922 | 0.78570 | Biso | 1.000 | O  |
| P14  | 1.0000 | 0.48908 | 0.27716 | 0.06804 | Biso | 1.000 | P  |
| O48  | 1.0000 | 0.60089 | 0.38422 | 0.08482 | Biso | 1.000 | O  |
| O49  | 1.0000 | 0.71172 | 0.25670 | 0.73688 | Biso | 1.000 | O  |
| O50  | 1.0000 | 0.94378 | 0.40832 | 0.75633 | Biso | 1.000 | O  |
| O51  | 1.0000 | 0.54403 | 0.14282 | 0.63686 | Biso | 1.000 | O  |
| O52  | 1.0000 | 0.49598 | 0.75755 | 0.94931 | Biso | 1.000 | O  |
| O53  | 1.0000 | 0.76737 | 0.50210 | 0.95060 | Biso | 1.000 | O  |
| O54  | 1.0000 | 0.73750 | 0.78119 | 0.96991 | Biso | 1.000 | O  |
| P15  | 1.0000 | 0.38675 | 0.83821 | 0.18532 | Biso | 1.000 | P  |
| O55  | 1.0000 | 0.41010 | 0.95852 | 0.17306 | Biso | 1.000 | O  |
| AI16 | 1.0000 | 0.38028 | 0.83572 | 0.38976 | Biso | 1.000 | AI |
| P16  | 1.0000 | 0.48582 | 0.72422 | 0.85053 | Biso | 1.000 | P  |
| O56  | 1.0000 | 0.37563 | 0.61614 | 0.83089 | Biso | 1.000 | O  |
| O57  | 1.0000 | 0.26091 | 0.75507 | 0.16769 | Biso | 1.000 | O  |
| O58  | 1.0000 | 0.04031 | 0.95584 | 0.17568 | Biso | 1.000 | O  |
| O59  | 1.0000 | 0.18833 | 0.51797 | 0.13779 | Biso | 1.000 | O  |
| O60  | 1.0000 | 0.13715 | 0.50286 | 0.45085 | Biso | 1.000 | O  |
| O61  | 1.0000 | 0.02940 | 0.59244 | 0.14506 | Biso | 1.000 | O  |
| O62  | 1.0000 | 0.41959 | 0.82090 | 0.28061 | Biso | 1.000 | O  |
| O63  | 1.0000 | 0.14957 | 0.58628 | 0.30177 | Biso | 1.000 | O  |
| O64  | 1.0000 | 0.32694 | 0.92833 | 0.38557 | Biso | 1.000 | O  |
| P17  | 1.0000 | 0.15589 | 0.60931 | 0.40250 | Biso | 1.000 | P  |
| O65  | 1.0000 | 0.27320 | 0.70586 | 0.42797 | Biso | 1.000 | O  |
| O66  | 1.0000 | 0.38238 | 0.58079 | 0.07751 | Biso | 1.000 | O  |
| AI17 | 1.0000 | 0.24989 | 0.49813 | 0.86205 | Biso | 1.000 | AI |
| O67  | 1.0000 | 0.05777 | 0.90685 | 0.39796 | Biso | 1.000 | O  |
| O68  | 1.0000 | 0.45931 | 0.81877 | 0.11813 | Biso | 1.000 | O  |
| O69  | 1.0000 | 0.06772 | 0.64043 | 0.43166 | Biso | 1.000 | O  |
| AI18 | 1.0000 | 0.15690 | 0.61412 | 0.18743 | Biso | 1.000 | AI |
| O70  | 1.0000 | 0.23014 | 0.21984 | 0.94921 | Biso | 1.000 | O  |

|     |        |         |         |         |      |       |   |
|-----|--------|---------|---------|---------|------|-------|---|
| O71 | 1.0000 | 0.47952 | 0.23670 | 0.97051 | Biso | 1.000 | O |
| O72 | 1.0000 | 0.21550 | 0.51042 | 0.97299 | Biso | 1.000 | O |
| H1  | 1.0000 | 0.85485 | 0.69012 | 0.54984 | Biso | 1.000 | H |
| C1  | 1.0000 | 0.66754 | 0.60192 | 0.62126 | Biso | 1.000 | C |
| O73 | 1.0000 | 0.83326 | 0.68773 | 0.61395 | Biso | 1.000 | O |
| H2  | 1.0000 | 0.67502 | 0.60252 | 0.69205 | Biso | 1.000 | H |
| H3  | 1.0000 | 0.66468 | 0.53454 | 0.58330 | Biso | 1.000 | H |
| H4  | 1.0000 | 0.65420 | 0.66332 | 0.58789 | Biso | 1.000 | H |
| H5  | 1.0000 | 0.85233 | 0.76433 | 0.62736 | Biso | 1.000 | H |
| C2  | 1.0000 | 0.34185 | 0.43353 | 0.31022 | Biso | 1.000 | C |
| H6  | 1.0000 | 0.35826 | 0.38343 | 0.26293 | Biso | 1.000 | H |
| H7  | 1.0000 | 0.26396 | 0.37889 | 0.34530 | Biso | 1.000 | H |
| H8  | 1.0000 | 0.33151 | 0.49575 | 0.27321 | Biso | 1.000 | H |
| C3  | 1.0000 | 0.55025 | 0.56701 | 0.32197 | Biso | 1.000 | C |
| C4  | 1.0000 | 0.45218 | 0.40436 | 0.42579 | Biso | 1.000 | C |
| H9  | 1.0000 | 0.45862 | 0.34244 | 0.38544 | Biso | 1.000 | H |
| C5  | 1.0000 | 0.45283 | 0.39731 | 0.51522 | Biso | 1.000 | C |
| C6  | 1.0000 | 0.45964 | 0.30509 | 0.56188 | Biso | 1.000 | C |
| C7  | 1.0000 | 0.44967 | 0.48305 | 0.56966 | Biso | 1.000 | C |
| C8  | 1.0000 | 0.47926 | 0.49390 | 0.65824 | Biso | 1.000 | C |
| C9  | 1.0000 | 0.42051 | 0.56005 | 0.52722 | Biso | 1.000 | C |
| C10 | 1.0000 | 0.39214 | 0.63007 | 0.58646 | Biso | 1.000 | C |
| C11 | 1.0000 | 0.41952 | 0.56448 | 0.43761 | Biso | 1.000 | C |
| H10 | 1.0000 | 0.40045 | 0.62309 | 0.40531 | Biso | 1.000 | H |
| C12 | 1.0000 | 0.44155 | 0.49239 | 0.37626 | Biso | 1.000 | C |
| H11 | 1.0000 | 0.56527 | 0.51574 | 0.27466 | Biso | 1.000 | H |
| H12 | 1.0000 | 0.62298 | 0.60996 | 0.36543 | Biso | 1.000 | H |
| H13 | 1.0000 | 0.54170 | 0.63016 | 0.28452 | Biso | 1.000 | H |
| H14 | 1.0000 | 0.45588 | 0.24511 | 0.51407 | Biso | 1.000 | H |
| H15 | 1.0000 | 0.39036 | 0.26089 | 0.60863 | Biso | 1.000 | H |
| H16 | 1.0000 | 0.53710 | 0.33674 | 0.59994 | Biso | 1.000 | H |
| H17 | 1.0000 | 0.47240 | 0.55294 | 0.70079 | Biso | 1.000 | H |
| H18 | 1.0000 | 0.48999 | 0.43100 | 0.69183 | Biso | 1.000 | H |
| H19 | 1.0000 | 0.36465 | 0.67855 | 0.54860 | Biso | 1.000 | H |
| H20 | 1.0000 | 0.46355 | 0.68769 | 0.62674 | Biso | 1.000 | H |
| H21 | 1.0000 | 0.32519 | 0.57692 | 0.63252 | Biso | 1.000 | H |

TS4-5 in TMB-based pathway

data\_image0

\_cell\_length\_a 13.8042  
 \_cell\_length\_b 13.8042  
 \_cell\_length\_c 15.044  
 \_cell\_angle\_alpha 90  
 \_cell\_angle\_beta 90  
 \_cell\_angle\_gamma 120

\_symmetry\_space\_group\_name\_H-M P 1  
 \_symmetry\_int\_tables\_number 1

loop\_

\_symmetry\_equiv\_pos\_as\_xyz  
 'x, y, z'

loop\_

\_atom\_site\_label  
 \_atom\_site\_occupancy  
 \_atom\_site\_fract\_x  
 \_atom\_site\_fract\_y  
 \_atom\_site\_fract\_z  
 \_atom\_site\_thermal\_displace\_type  
 \_atom\_site\_B\_iso\_or\_equiv  
 \_atom\_site\_type\_symbol

|     |        |         |         |         |      |       |    |
|-----|--------|---------|---------|---------|------|-------|----|
| P1  | 1.0000 | 0.06876 | 0.18102 | 0.51582 | Biso | 1.000 | P  |
| O1  | 1.0000 | 0.10475 | 0.30606 | 0.50888 | Biso | 1.000 | O  |
| O2  | 1.0000 | 0.30033 | 0.39736 | 0.81541 | Biso | 1.000 | O  |
| O3  | 1.0000 | 0.15953 | 0.49495 | 0.78095 | Biso | 1.000 | O  |
| Al1 | 1.0000 | 0.27675 | 0.28623 | 0.05839 | Biso | 1.000 | Al |
| O4  | 1.0000 | 0.18030 | 0.11350 | 0.27326 | Biso | 1.000 | O  |
| Al2 | 1.0000 | 0.06332 | 0.17578 | 0.72072 | Biso | 1.000 | Al |
| P2  | 1.0000 | 0.16465 | 0.07251 | 0.17592 | Biso | 1.000 | P  |
| Al3 | 1.0000 | 0.16534 | 0.06740 | 0.38567 | Biso | 1.000 | Al |
| O5  | 1.0000 | 0.09512 | 0.15520 | 0.61076 | Biso | 1.000 | O  |
| P3  | 1.0000 | 0.27395 | 0.27798 | 0.84263 | Biso | 1.000 | P  |
| O6  | 1.0000 | 0.37380 | 0.26378 | 0.81520 | Biso | 1.000 | O  |
| O7  | 1.0000 | 0.25603 | 0.04215 | 0.15111 | Biso | 1.000 | O  |
| O8  | 1.0000 | 0.49687 | 0.20104 | 0.13198 | Biso | 1.000 | O  |
| Al4 | 1.0000 | 0.06578 | 0.40794 | 0.51640 | Biso | 1.000 | Al |
| O9  | 1.0000 | 0.16909 | 0.18908 | 0.79319 | Biso | 1.000 | O  |
| P4  | 1.0000 | 0.26819 | 0.50529 | 0.05224 | Biso | 1.000 | P  |
| Al5 | 1.0000 | 0.39323 | 0.07551 | 0.17977 | Biso | 1.000 | Al |

|      |        |         |         |         |      |       |    |
|------|--------|---------|---------|---------|------|-------|----|
| O10  | 1.0000 | 0.26613 | 0.40207 | 0.09352 | Biso | 1.000 | O  |
| O11  | 1.0000 | 0.04680 | 0.29469 | 0.72391 | Biso | 1.000 | O  |
| O12  | 1.0000 | 0.41604 | 0.09437 | 0.29490 | Biso | 1.000 | O  |
| O13  | 1.0000 | 0.13707 | 0.15874 | 0.44728 | Biso | 1.000 | O  |
| O14  | 1.0000 | 0.08757 | 0.46121 | 0.62582 | Biso | 1.000 | O  |
| P5   | 1.0000 | 0.38531 | 0.06809 | 0.39413 | Biso | 1.000 | P  |
| O15  | 1.0000 | 0.30148 | 0.10380 | 0.42382 | Biso | 1.000 | O  |
| O16  | 1.0000 | 0.41602 | 0.32181 | 0.08359 | Biso | 1.000 | O  |
| P6   | 1.0000 | 0.06187 | 0.41358 | 0.72153 | Biso | 1.000 | P  |
| AI6  | 1.0000 | 0.49793 | 0.27503 | 0.85710 | Biso | 1.000 | AI |
| O17  | 1.0000 | 0.17619 | 0.16786 | 0.11489 | Biso | 1.000 | O  |
| AI7  | 1.0000 | 0.94953 | 0.61750 | 0.38996 | Biso | 1.000 | AI |
| P7   | 1.0000 | 0.72840 | 0.51237 | 0.84466 | Biso | 1.000 | P  |
| AI8  | 1.0000 | 0.59598 | 0.93561 | 0.71384 | Biso | 1.000 | AI |
| O18  | 1.0000 | 0.73044 | 0.61856 | 0.80925 | Biso | 1.000 | O  |
| O19  | 1.0000 | 0.96624 | 0.73613 | 0.15133 | Biso | 1.000 | O  |
| O20  | 1.0000 | 0.82407 | 0.82784 | 0.11261 | Biso | 1.000 | O  |
| O21  | 1.0000 | 0.57809 | 0.89016 | 0.60190 | Biso | 1.000 | O  |
| O22  | 1.0000 | 0.86800 | 0.86895 | 0.46401 | Biso | 1.000 | O  |
| O23  | 1.0000 | 0.92399 | 0.59299 | 0.27502 | Biso | 1.000 | O  |
| P8   | 1.0000 | 0.61247 | 0.95034 | 0.51056 | Biso | 1.000 | P  |
| O24  | 1.0000 | 0.71026 | 0.94215 | 0.46997 | Biso | 1.000 | O  |
| O25  | 1.0000 | 0.58979 | 0.71421 | 0.82436 | Biso | 1.000 | O  |
| O26  | 1.0000 | 0.82077 | 0.85076 | 0.77377 | Biso | 1.000 | O  |
| P9   | 1.0000 | 0.94211 | 0.61700 | 0.17423 | Biso | 1.000 | P  |
| AI9  | 1.0000 | 0.49756 | 0.74417 | 0.04303 | Biso | 1.000 | AI |
| Si1  | 1.0000 | 0.93783 | 0.83643 | 0.39502 | Biso | 1.000 | Si |
| O27  | 1.0000 | 0.91413 | 0.71266 | 0.43254 | Biso | 1.000 | O  |
| O28  | 1.0000 | 0.69883 | 0.62165 | 0.07256 | Biso | 1.000 | O  |
| O29  | 1.0000 | 0.51233 | 0.89391 | 0.44701 | Biso | 1.000 | O  |
| AI10 | 1.0000 | 0.72728 | 0.73979 | 0.84219 | Biso | 1.000 | AI |
| O30  | 1.0000 | 0.82602 | 0.93662 | 0.62700 | Biso | 1.000 | O  |
| O31  | 1.0000 | 0.83636 | 0.52771 | 0.12544 | Biso | 1.000 | O  |
| P10  | 1.0000 | 0.82909 | 0.95523 | 0.72801 | Biso | 1.000 | P  |
| AI11 | 1.0000 | 0.93156 | 0.83962 | 0.18462 | Biso | 1.000 | AI |
| AI12 | 1.0000 | 0.84041 | 0.96500 | 0.51118 | Biso | 1.000 | AI |
| O32  | 1.0000 | 0.88968 | 0.82202 | 0.29404 | Biso | 1.000 | O  |
| O33  | 1.0000 | 0.86420 | 0.49196 | 0.44790 | Biso | 1.000 | O  |
| O34  | 1.0000 | 0.49190 | 0.81845 | 0.77008 | Biso | 1.000 | O  |
| P11  | 1.0000 | 0.72973 | 0.74430 | 0.05209 | Biso | 1.000 | P  |
| O35  | 1.0000 | 0.62478 | 0.75331 | 0.07058 | Biso | 1.000 | O  |
| O36  | 1.0000 | 0.72960 | 0.97132 | 0.75618 | Biso | 1.000 | O  |
| O37  | 1.0000 | 0.83479 | 0.42536 | 0.60595 | Biso | 1.000 | O  |
| O38  | 1.0000 | 0.49350 | 0.13561 | 0.44814 | Biso | 1.000 | O  |



|      |        |         |         |         |      |       |    |
|------|--------|---------|---------|---------|------|-------|----|
| O39  | 1.0000 | 0.65017 | 0.07541 | 0.52496 | Biso | 1.000 | O  |
| P12  | 1.0000 | 0.83587 | 0.39121 | 0.50786 | Biso | 1.000 | P  |
| O40  | 1.0000 | 0.71825 | 0.29707 | 0.48102 | Biso | 1.000 | O  |
| O41  | 1.0000 | 0.60467 | 0.41704 | 0.85141 | Biso | 1.000 | O  |
| O42  | 1.0000 | 0.52775 | 0.18724 | 0.79339 | Biso | 1.000 | O  |
| AI13 | 1.0000 | 0.73708 | 0.51972 | 0.04912 | Biso | 1.000 | AI |
| O43  | 1.0000 | 0.94129 | 0.10912 | 0.49682 | Biso | 1.000 | O  |
| AI14 | 1.0000 | 0.82679 | 0.39182 | 0.72017 | Biso | 1.000 | AI |
| O44  | 1.0000 | 0.92098 | 0.35027 | 0.49383 | Biso | 1.000 | O  |
| P13  | 1.0000 | 0.59765 | 0.16852 | 0.72320 | Biso | 1.000 | P  |
| O45  | 1.0000 | 0.57149 | 0.04685 | 0.73130 | Biso | 1.000 | O  |
| AI15 | 1.0000 | 0.60412 | 0.17301 | 0.52072 | Biso | 1.000 | AI |
| O46  | 1.0000 | 0.93848 | 0.05929 | 0.75758 | Biso | 1.000 | O  |
| O47  | 1.0000 | 0.79385 | 0.48160 | 0.77861 | Biso | 1.000 | O  |
| P14  | 1.0000 | 0.50286 | 0.28507 | 0.06194 | Biso | 1.000 | P  |
| O48  | 1.0000 | 0.62065 | 0.38741 | 0.06543 | Biso | 1.000 | O  |
| O49  | 1.0000 | 0.72451 | 0.24961 | 0.73889 | Biso | 1.000 | O  |
| O50  | 1.0000 | 0.95440 | 0.40817 | 0.75730 | Biso | 1.000 | O  |
| O51  | 1.0000 | 0.56461 | 0.18966 | 0.62933 | Biso | 1.000 | O  |
| O52  | 1.0000 | 0.50659 | 0.79460 | 0.93366 | Biso | 1.000 | O  |
| O53  | 1.0000 | 0.78458 | 0.53456 | 0.93751 | Biso | 1.000 | O  |
| O54  | 1.0000 | 0.76753 | 0.77348 | 0.95395 | Biso | 1.000 | O  |
| P15  | 1.0000 | 0.39773 | 0.85564 | 0.17294 | Biso | 1.000 | P  |
| O55  | 1.0000 | 0.41668 | 0.96914 | 0.13924 | Biso | 1.000 | O  |
| AI16 | 1.0000 | 0.39084 | 0.85337 | 0.38532 | Biso | 1.000 | AI |
| P16  | 1.0000 | 0.49353 | 0.73929 | 0.84126 | Biso | 1.000 | P  |
| O56  | 1.0000 | 0.38248 | 0.62915 | 0.83485 | Biso | 1.000 | O  |
| O57  | 1.0000 | 0.27289 | 0.76636 | 0.16005 | Biso | 1.000 | O  |
| O58  | 1.0000 | 0.04876 | 0.97071 | 0.15957 | Biso | 1.000 | O  |
| O59  | 1.0000 | 0.19889 | 0.53708 | 0.11233 | Biso | 1.000 | O  |
| O60  | 1.0000 | 0.15220 | 0.51570 | 0.44333 | Biso | 1.000 | O  |
| O61  | 1.0000 | 0.04096 | 0.60415 | 0.14103 | Biso | 1.000 | O  |
| O62  | 1.0000 | 0.42955 | 0.86345 | 0.27245 | Biso | 1.000 | O  |
| O63  | 1.0000 | 0.16666 | 0.58861 | 0.28940 | Biso | 1.000 | O  |
| O64  | 1.0000 | 0.33508 | 0.94046 | 0.41028 | Biso | 1.000 | O  |
| P17  | 1.0000 | 0.17487 | 0.61947 | 0.38898 | Biso | 1.000 | P  |
| O65  | 1.0000 | 0.29424 | 0.71397 | 0.41257 | Biso | 1.000 | O  |
| O66  | 1.0000 | 0.39122 | 0.60187 | 0.04524 | Biso | 1.000 | O  |
| AI17 | 1.0000 | 0.26447 | 0.49860 | 0.84810 | Biso | 1.000 | AI |
| O67  | 1.0000 | 0.07183 | 0.92638 | 0.39700 | Biso | 1.000 | O  |
| O68  | 1.0000 | 0.47439 | 0.82540 | 0.12001 | Biso | 1.000 | O  |
| O69  | 1.0000 | 0.09137 | 0.65946 | 0.41219 | Biso | 1.000 | O  |
| AI18 | 1.0000 | 0.17012 | 0.62476 | 0.17655 | Biso | 1.000 | AI |
| O70  | 1.0000 | 0.25237 | 0.26107 | 0.94355 | Biso | 1.000 | O  |

|     |        |         |         |         |      |       |   |
|-----|--------|---------|---------|---------|------|-------|---|
| O71 | 1.0000 | 0.47901 | 0.22932 | 0.96871 | Biso | 1.000 | O |
| O72 | 1.0000 | 0.21479 | 0.47650 | 0.95845 | Biso | 1.000 | O |
| H1  | 1.0000 | 0.83365 | 0.66886 | 0.51339 | Biso | 1.000 | H |
| C1  | 1.0000 | 0.54214 | 0.42374 | 0.63080 | Biso | 1.000 | C |
| O73 | 1.0000 | 0.78121 | 0.64065 | 0.56819 | Biso | 1.000 | O |
| H2  | 1.0000 | 0.59189 | 0.39294 | 0.66298 | Biso | 1.000 | H |
| H3  | 1.0000 | 0.54705 | 0.49079 | 0.67184 | Biso | 1.000 | H |
| H4  | 1.0000 | 0.45526 | 0.35505 | 0.63135 | Biso | 1.000 | H |
| H5  | 1.0000 | 0.77147 | 0.70344 | 0.58525 | Biso | 1.000 | H |
| C2  | 1.0000 | 0.61196 | 0.75179 | 0.30103 | Biso | 1.000 | C |
| H6  | 1.0000 | 0.58043 | 0.80953 | 0.30747 | Biso | 1.000 | H |
| H7  | 1.0000 | 0.68535 | 0.78052 | 0.34290 | Biso | 1.000 | H |
| H8  | 1.0000 | 0.63677 | 0.75271 | 0.23247 | Biso | 1.000 | H |
| C3  | 1.0000 | 0.41676 | 0.58943 | 0.26731 | Biso | 1.000 | C |
| C4  | 1.0000 | 0.48666 | 0.63011 | 0.42129 | Biso | 1.000 | C |
| H9  | 1.0000 | 0.44908 | 0.68055 | 0.43605 | Biso | 1.000 | H |
| C5  | 1.0000 | 0.49702 | 0.57090 | 0.48840 | Biso | 1.000 | C |
| C6  | 1.0000 | 0.45553 | 0.58031 | 0.57952 | Biso | 1.000 | C |
| C7  | 1.0000 | 0.54909 | 0.50292 | 0.47013 | Biso | 1.000 | C |
| C8  | 1.0000 | 0.58434 | 0.45605 | 0.53620 | Biso | 1.000 | C |
| C9  | 1.0000 | 0.57458 | 0.49113 | 0.37696 | Biso | 1.000 | C |
| C10 | 1.0000 | 0.60808 | 0.40697 | 0.34958 | Biso | 1.000 | C |
| C11 | 1.0000 | 0.56398 | 0.55368 | 0.31321 | Biso | 1.000 | C |
| H10 | 1.0000 | 0.58339 | 0.54464 | 0.24480 | Biso | 1.000 | H |
| C12 | 1.0000 | 0.52110 | 0.63135 | 0.32784 | Biso | 1.000 | C |
| H11 | 1.0000 | 0.38700 | 0.64885 | 0.26776 | Biso | 1.000 | H |
| H12 | 1.0000 | 0.34916 | 0.50823 | 0.28947 | Biso | 1.000 | H |
| H13 | 1.0000 | 0.43917 | 0.58023 | 0.19990 | Biso | 1.000 | H |
| H14 | 1.0000 | 0.41215 | 0.62787 | 0.57436 | Biso | 1.000 | H |
| H15 | 1.0000 | 0.52382 | 0.62431 | 0.62708 | Biso | 1.000 | H |
| H16 | 1.0000 | 0.39749 | 0.49874 | 0.60799 | Biso | 1.000 | H |
| H17 | 1.0000 | 0.61614 | 0.40430 | 0.51004 | Biso | 1.000 | H |
| H18 | 1.0000 | 0.69143 | 0.56135 | 0.54794 | Biso | 1.000 | H |
| H19 | 1.0000 | 0.61094 | 0.40336 | 0.27734 | Biso | 1.000 | H |
| H20 | 1.0000 | 0.54766 | 0.32367 | 0.37325 | Biso | 1.000 | H |
| H21 | 1.0000 | 0.68957 | 0.42631 | 0.37462 | Biso | 1.000 | H |

TS5-6 in TMB-based pathway

data\_image0

\_cell\_length\_a 13.8042  
 \_cell\_length\_b 13.8042  
 \_cell\_length\_c 15.044  
 \_cell\_angle\_alpha 90  
 \_cell\_angle\_beta 90  
 \_cell\_angle\_gamma 120

\_symmetry\_space\_group\_name\_H-M P 1  
 \_symmetry\_int\_tables\_number 1

loop\_

\_symmetry\_equiv\_pos\_as\_xyz  
 'x, y, z'

loop\_

\_atom\_site\_label  
 \_atom\_site\_occupancy  
 \_atom\_site\_fract\_x  
 \_atom\_site\_fract\_y  
 \_atom\_site\_fract\_z  
 \_atom\_site\_thermal\_displace\_type  
 \_atom\_site\_B\_iso\_or\_equiv  
 \_atom\_site\_type\_symbol

|     |        |         |         |         |      |       |    |
|-----|--------|---------|---------|---------|------|-------|----|
| P1  | 1.0000 | 0.06661 | 0.18404 | 0.52309 | Biso | 1.000 | P  |
| O1  | 1.0000 | 0.10564 | 0.30995 | 0.52045 | Biso | 1.000 | O  |
| O2  | 1.0000 | 0.30378 | 0.40207 | 0.83075 | Biso | 1.000 | O  |
| O3  | 1.0000 | 0.15661 | 0.49147 | 0.79104 | Biso | 1.000 | O  |
| Al1 | 1.0000 | 0.26618 | 0.28483 | 0.06435 | Biso | 1.000 | Al |
| O4  | 1.0000 | 0.19038 | 0.12366 | 0.28359 | Biso | 1.000 | O  |
| Al2 | 1.0000 | 0.06032 | 0.17701 | 0.72769 | Biso | 1.000 | Al |
| P2  | 1.0000 | 0.16535 | 0.07791 | 0.18748 | Biso | 1.000 | P  |
| Al3 | 1.0000 | 0.16891 | 0.07398 | 0.39520 | Biso | 1.000 | Al |
| O5  | 1.0000 | 0.08753 | 0.15221 | 0.61766 | Biso | 1.000 | O  |
| P3  | 1.0000 | 0.26782 | 0.27902 | 0.85529 | Biso | 1.000 | P  |
| O6  | 1.0000 | 0.36823 | 0.26117 | 0.84215 | Biso | 1.000 | O  |
| O7  | 1.0000 | 0.25507 | 0.04732 | 0.15766 | Biso | 1.000 | O  |
| O8  | 1.0000 | 0.49353 | 0.20680 | 0.14228 | Biso | 1.000 | O  |
| Al4 | 1.0000 | 0.06874 | 0.41357 | 0.52571 | Biso | 1.000 | Al |
| O9  | 1.0000 | 0.17383 | 0.19697 | 0.79315 | Biso | 1.000 | O  |
| P4  | 1.0000 | 0.27144 | 0.51146 | 0.06169 | Biso | 1.000 | P  |
| Al5 | 1.0000 | 0.39125 | 0.07987 | 0.18903 | Biso | 1.000 | Al |

|      |        |         |         |         |      |       |    |
|------|--------|---------|---------|---------|------|-------|----|
| O10  | 1.0000 | 0.26440 | 0.40509 | 0.10123 | Biso | 1.000 | O  |
| O11  | 1.0000 | 0.03965 | 0.29344 | 0.73025 | Biso | 1.000 | O  |
| O12  | 1.0000 | 0.41245 | 0.09827 | 0.30448 | Biso | 1.000 | O  |
| O13  | 1.0000 | 0.13758 | 0.16388 | 0.45568 | Biso | 1.000 | O  |
| O14  | 1.0000 | 0.08540 | 0.46426 | 0.63586 | Biso | 1.000 | O  |
| P5   | 1.0000 | 0.38427 | 0.06955 | 0.40381 | Biso | 1.000 | P  |
| O15  | 1.0000 | 0.30326 | 0.10727 | 0.43754 | Biso | 1.000 | O  |
| O16  | 1.0000 | 0.40533 | 0.31400 | 0.07557 | Biso | 1.000 | O  |
| P6   | 1.0000 | 0.05839 | 0.41386 | 0.73073 | Biso | 1.000 | P  |
| Al6  | 1.0000 | 0.49965 | 0.27774 | 0.86621 | Biso | 1.000 | Al |
| O17  | 1.0000 | 0.17016 | 0.17028 | 0.12644 | Biso | 1.000 | O  |
| Al7  | 1.0000 | 0.94794 | 0.62057 | 0.40105 | Biso | 1.000 | Al |
| P7   | 1.0000 | 0.72648 | 0.51418 | 0.85161 | Biso | 1.000 | P  |
| Al8  | 1.0000 | 0.59648 | 0.94023 | 0.72252 | Biso | 1.000 | Al |
| O18  | 1.0000 | 0.73238 | 0.62472 | 0.82391 | Biso | 1.000 | O  |
| O19  | 1.0000 | 0.96927 | 0.74138 | 0.16169 | Biso | 1.000 | O  |
| O20  | 1.0000 | 0.82917 | 0.83534 | 0.12055 | Biso | 1.000 | O  |
| O21  | 1.0000 | 0.57783 | 0.89026 | 0.61173 | Biso | 1.000 | O  |
| O22  | 1.0000 | 0.87438 | 0.87785 | 0.47263 | Biso | 1.000 | O  |
| O23  | 1.0000 | 0.92367 | 0.59710 | 0.28532 | Biso | 1.000 | O  |
| P8   | 1.0000 | 0.61164 | 0.95075 | 0.52042 | Biso | 1.000 | P  |
| O24  | 1.0000 | 0.70797 | 0.94129 | 0.47828 | Biso | 1.000 | O  |
| O25  | 1.0000 | 0.58541 | 0.71324 | 0.83221 | Biso | 1.000 | O  |
| O26  | 1.0000 | 0.81593 | 0.85032 | 0.77734 | Biso | 1.000 | O  |
| P9   | 1.0000 | 0.94199 | 0.62113 | 0.18448 | Biso | 1.000 | P  |
| Al9  | 1.0000 | 0.49813 | 0.74740 | 0.05316 | Biso | 1.000 | Al |
| Si1  | 1.0000 | 0.94089 | 0.84090 | 0.40393 | Biso | 1.000 | Si |
| O27  | 1.0000 | 0.92379 | 0.72217 | 0.44520 | Biso | 1.000 | O  |
| O28  | 1.0000 | 0.70141 | 0.63209 | 0.07510 | Biso | 1.000 | O  |
| O29  | 1.0000 | 0.50995 | 0.89676 | 0.45829 | Biso | 1.000 | O  |
| Al10 | 1.0000 | 0.72480 | 0.74493 | 0.85152 | Biso | 1.000 | Al |
| O30  | 1.0000 | 0.83034 | 0.94682 | 0.63441 | Biso | 1.000 | O  |
| O31  | 1.0000 | 0.83518 | 0.53457 | 0.13497 | Biso | 1.000 | O  |
| P10  | 1.0000 | 0.82936 | 0.95940 | 0.73575 | Biso | 1.000 | P  |
| Al11 | 1.0000 | 0.93191 | 0.84259 | 0.19616 | Biso | 1.000 | Al |
| Al12 | 1.0000 | 0.84112 | 0.97038 | 0.51769 | Biso | 1.000 | Al |
| O32  | 1.0000 | 0.88621 | 0.81917 | 0.30457 | Biso | 1.000 | O  |
| O33  | 1.0000 | 0.85518 | 0.49549 | 0.45794 | Biso | 1.000 | O  |
| O34  | 1.0000 | 0.49346 | 0.82514 | 0.78095 | Biso | 1.000 | O  |
| P11  | 1.0000 | 0.73234 | 0.75561 | 0.06025 | Biso | 1.000 | P  |
| O35  | 1.0000 | 0.62856 | 0.76527 | 0.08371 | Biso | 1.000 | O  |
| O36  | 1.0000 | 0.73074 | 0.97672 | 0.76394 | Biso | 1.000 | O  |
| O37  | 1.0000 | 0.83304 | 0.42327 | 0.61401 | Biso | 1.000 | O  |
| O38  | 1.0000 | 0.49428 | 0.13262 | 0.45647 | Biso | 1.000 | O  |

|      |        |         |         |         |      |       |    |
|------|--------|---------|---------|---------|------|-------|----|
| O39  | 1.0000 | 0.65241 | 0.07644 | 0.53614 | Biso | 1.000 | O  |
| P12  | 1.0000 | 0.83590 | 0.39476 | 0.51452 | Biso | 1.000 | P  |
| O40  | 1.0000 | 0.72094 | 0.29645 | 0.48692 | Biso | 1.000 | O  |
| O41  | 1.0000 | 0.60229 | 0.41920 | 0.84573 | Biso | 1.000 | O  |
| O42  | 1.0000 | 0.51657 | 0.18532 | 0.79656 | Biso | 1.000 | O  |
| AI13 | 1.0000 | 0.73394 | 0.52477 | 0.05976 | Biso | 1.000 | AI |
| O43  | 1.0000 | 0.93986 | 0.11514 | 0.50041 | Biso | 1.000 | O  |
| AI14 | 1.0000 | 0.82560 | 0.39628 | 0.72947 | Biso | 1.000 | AI |
| O44  | 1.0000 | 0.92692 | 0.36279 | 0.49681 | Biso | 1.000 | O  |
| P13  | 1.0000 | 0.59522 | 0.17300 | 0.73083 | Biso | 1.000 | P  |
| O45  | 1.0000 | 0.57267 | 0.05239 | 0.73751 | Biso | 1.000 | O  |
| AI15 | 1.0000 | 0.60662 | 0.17395 | 0.52808 | Biso | 1.000 | AI |
| O46  | 1.0000 | 0.93934 | 0.05963 | 0.76979 | Biso | 1.000 | O  |
| O47  | 1.0000 | 0.79864 | 0.49237 | 0.78536 | Biso | 1.000 | O  |
| P14  | 1.0000 | 0.50382 | 0.29079 | 0.07052 | Biso | 1.000 | P  |
| O48  | 1.0000 | 0.61256 | 0.40088 | 0.08806 | Biso | 1.000 | O  |
| O49  | 1.0000 | 0.71963 | 0.25678 | 0.75333 | Biso | 1.000 | O  |
| O50  | 1.0000 | 0.95200 | 0.41007 | 0.76729 | Biso | 1.000 | O  |
| O51  | 1.0000 | 0.56872 | 0.19672 | 0.63544 | Biso | 1.000 | O  |
| O52  | 1.0000 | 0.50714 | 0.79632 | 0.94330 | Biso | 1.000 | O  |
| O53  | 1.0000 | 0.77226 | 0.52246 | 0.94718 | Biso | 1.000 | O  |
| O54  | 1.0000 | 0.76653 | 0.78872 | 0.96169 | Biso | 1.000 | O  |
| P15  | 1.0000 | 0.39514 | 0.85975 | 0.18381 | Biso | 1.000 | P  |
| O55  | 1.0000 | 0.41509 | 0.97335 | 0.14904 | Biso | 1.000 | O  |
| AI16 | 1.0000 | 0.39075 | 0.85667 | 0.39338 | Biso | 1.000 | AI |
| P16  | 1.0000 | 0.49193 | 0.74242 | 0.85017 | Biso | 1.000 | P  |
| O56  | 1.0000 | 0.37850 | 0.63501 | 0.84173 | Biso | 1.000 | O  |
| O57  | 1.0000 | 0.26835 | 0.77299 | 0.17817 | Biso | 1.000 | O  |
| O58  | 1.0000 | 0.04882 | 0.97552 | 0.17733 | Biso | 1.000 | O  |
| O59  | 1.0000 | 0.20850 | 0.54917 | 0.12352 | Biso | 1.000 | O  |
| O60  | 1.0000 | 0.16209 | 0.51887 | 0.45393 | Biso | 1.000 | O  |
| O61  | 1.0000 | 0.03897 | 0.60498 | 0.15102 | Biso | 1.000 | O  |
| O62  | 1.0000 | 0.43511 | 0.87130 | 0.28157 | Biso | 1.000 | O  |
| O63  | 1.0000 | 0.16129 | 0.58559 | 0.29950 | Biso | 1.000 | O  |
| O64  | 1.0000 | 0.33174 | 0.94131 | 0.41713 | Biso | 1.000 | O  |
| P17  | 1.0000 | 0.17425 | 0.61860 | 0.39886 | Biso | 1.000 | P  |
| O65  | 1.0000 | 0.29264 | 0.71763 | 0.41779 | Biso | 1.000 | O  |
| O66  | 1.0000 | 0.39656 | 0.60303 | 0.05271 | Biso | 1.000 | O  |
| AI17 | 1.0000 | 0.26426 | 0.50240 | 0.85862 | Biso | 1.000 | AI |
| O67  | 1.0000 | 0.07442 | 0.93317 | 0.40066 | Biso | 1.000 | O  |
| O68  | 1.0000 | 0.46423 | 0.82350 | 0.12711 | Biso | 1.000 | O  |
| O69  | 1.0000 | 0.08624 | 0.65078 | 0.42662 | Biso | 1.000 | O  |
| AI18 | 1.0000 | 0.16909 | 0.62862 | 0.18802 | Biso | 1.000 | AI |
| O70  | 1.0000 | 0.22442 | 0.25411 | 0.95199 | Biso | 1.000 | O  |

|     |        |         |         |         |      |       |   |
|-----|--------|---------|---------|---------|------|-------|---|
| O71 | 1.0000 | 0.50693 | 0.24290 | 0.97776 | Biso | 1.000 | O |
| O72 | 1.0000 | 0.21527 | 0.48580 | 0.96893 | Biso | 1.000 | O |
| H1  | 1.0000 | 0.87638 | 0.70565 | 0.55558 | Biso | 1.000 | H |
| C1  | 1.0000 | 0.68335 | 0.56514 | 0.57833 | Biso | 1.000 | C |
| H2  | 1.0000 | 0.71786 | 0.51570 | 0.55462 | Biso | 1.000 | H |
| H3  | 1.0000 | 0.67588 | 0.62221 | 0.53412 | Biso | 1.000 | H |
| H4  | 1.0000 | 0.65153 | 0.55400 | 0.64515 | Biso | 1.000 | H |
| C2  | 1.0000 | 0.61157 | 0.75134 | 0.31577 | Biso | 1.000 | C |
| C3  | 1.0000 | 0.55984 | 0.55215 | 0.32754 | Biso | 1.000 | C |
| H5  | 1.0000 | 0.59268 | 0.55153 | 0.26198 | Biso | 1.000 | H |
| C4  | 1.0000 | 0.55266 | 0.47781 | 0.38872 | Biso | 1.000 | C |
| C5  | 1.0000 | 0.58860 | 0.39543 | 0.36190 | Biso | 1.000 | C |
| C6  | 1.0000 | 0.50498 | 0.47430 | 0.47761 | Biso | 1.000 | C |
| C7  | 1.0000 | 0.50625 | 0.40059 | 0.53987 | Biso | 1.000 | C |
| C8  | 1.0000 | 0.46571 | 0.55389 | 0.49532 | Biso | 1.000 | C |
| C9  | 1.0000 | 0.41940 | 0.56293 | 0.58429 | Biso | 1.000 | C |
| C10 | 1.0000 | 0.47677 | 0.62725 | 0.43139 | Biso | 1.000 | C |
| H6  | 1.0000 | 0.45093 | 0.68725 | 0.44698 | Biso | 1.000 | H |
| C11 | 1.0000 | 0.51822 | 0.63148 | 0.33951 | Biso | 1.000 | C |
| H7  | 1.0000 | 0.64075 | 0.75312 | 0.24839 | Biso | 1.000 | H |
| H8  | 1.0000 | 0.68225 | 0.77858 | 0.36048 | Biso | 1.000 | H |
| H9  | 1.0000 | 0.58112 | 0.81022 | 0.31980 | Biso | 1.000 | H |
| H10 | 1.0000 | 0.51825 | 0.31019 | 0.36389 | Biso | 1.000 | H |
| H11 | 1.0000 | 0.65416 | 0.39875 | 0.40380 | Biso | 1.000 | H |
| H12 | 1.0000 | 0.62041 | 0.41218 | 0.29400 | Biso | 1.000 | H |
| H13 | 1.0000 | 0.54358 | 0.35268 | 0.51649 | Biso | 1.000 | H |
| H14 | 1.0000 | 0.47328 | 0.56995 | 0.64010 | Biso | 1.000 | H |
| H15 | 1.0000 | 0.33677 | 0.49059 | 0.59691 | Biso | 1.000 | H |
| H16 | 1.0000 | 0.41032 | 0.63696 | 0.58496 | Biso | 1.000 | H |
| C12 | 1.0000 | 0.41843 | 0.59253 | 0.27418 | Biso | 1.000 | C |
| H17 | 1.0000 | 0.44545 | 0.58510 | 0.20789 | Biso | 1.000 | H |
| H18 | 1.0000 | 0.34890 | 0.51106 | 0.29356 | Biso | 1.000 | H |
| H19 | 1.0000 | 0.38958 | 0.65272 | 0.27288 | Biso | 1.000 | H |
| C13 | 1.0000 | 0.44055 | 0.35213 | 0.62363 | Biso | 1.000 | C |
| O73 | 1.0000 | 0.84024 | 0.68257 | 0.61531 | Biso | 1.000 | O |
| H20 | 1.0000 | 0.49586 | 0.36279 | 0.67919 | Biso | 1.000 | H |
| H21 | 1.0000 | 0.38710 | 0.38491 | 0.64312 | Biso | 1.000 | H |
| H22 | 1.0000 | 0.38788 | 0.26168 | 0.61409 | Biso | 1.000 | H |
| H23 | 1.0000 | 0.83772 | 0.74733 | 0.63811 | Biso | 1.000 | H |

TS-MS1/C2 in TMB-based pathway

data\_image0

\_cell\_length\_a 13.8042  
 \_cell\_length\_b 13.8042  
 \_cell\_length\_c 15.044  
 \_cell\_angle\_alpha 90  
 \_cell\_angle\_beta 90  
 \_cell\_angle\_gamma 120

\_symmetry\_space\_group\_name\_H-M P 1  
 \_symmetry\_int\_tables\_number 1

loop\_

\_symmetry\_equiv\_pos\_as\_xyz  
 'x, y, z'

loop\_

\_atom\_site\_label  
 \_atom\_site\_occupancy  
 \_atom\_site\_fract\_x  
 \_atom\_site\_fract\_y  
 \_atom\_site\_fract\_z  
 \_atom\_site\_thermal\_displace\_type  
 \_atom\_site\_B\_iso\_or\_equiv  
 \_atom\_site\_type\_symbol

|     |        |         |         |         |      |       |    |
|-----|--------|---------|---------|---------|------|-------|----|
| P1  | 1.0000 | 0.05648 | 0.19503 | 0.53069 | Biso | 1.000 | P  |
| O1  | 1.0000 | 0.09523 | 0.32046 | 0.51838 | Biso | 1.000 | O  |
| O2  | 1.0000 | 0.29616 | 0.41008 | 0.82672 | Biso | 1.000 | O  |
| O3  | 1.0000 | 0.14004 | 0.49245 | 0.81037 | Biso | 1.000 | O  |
| Al1 | 1.0000 | 0.26276 | 0.29443 | 0.07335 | Biso | 1.000 | Al |
| O4  | 1.0000 | 0.17353 | 0.13227 | 0.28639 | Biso | 1.000 | O  |
| Al2 | 1.0000 | 0.05020 | 0.18790 | 0.73634 | Biso | 1.000 | Al |
| P2  | 1.0000 | 0.15453 | 0.08279 | 0.19135 | Biso | 1.000 | P  |
| Al3 | 1.0000 | 0.15387 | 0.08042 | 0.39805 | Biso | 1.000 | Al |
| O5  | 1.0000 | 0.08792 | 0.17585 | 0.62604 | Biso | 1.000 | O  |
| P3  | 1.0000 | 0.26401 | 0.28975 | 0.85650 | Biso | 1.000 | P  |
| O6  | 1.0000 | 0.35913 | 0.26744 | 0.83050 | Biso | 1.000 | O  |
| O7  | 1.0000 | 0.24587 | 0.05140 | 0.16916 | Biso | 1.000 | O  |
| O8  | 1.0000 | 0.48552 | 0.21179 | 0.14936 | Biso | 1.000 | O  |
| Al4 | 1.0000 | 0.05478 | 0.42012 | 0.53798 | Biso | 1.000 | Al |
| O9  | 1.0000 | 0.15685 | 0.20349 | 0.80861 | Biso | 1.000 | O  |
| P4  | 1.0000 | 0.26548 | 0.51811 | 0.07690 | Biso | 1.000 | P  |
| Al5 | 1.0000 | 0.38320 | 0.08584 | 0.19776 | Biso | 1.000 | Al |

|      |        |         |         |         |      |       |    |
|------|--------|---------|---------|---------|------|-------|----|
| O10  | 1.0000 | 0.24576 | 0.40521 | 0.11314 | Biso | 1.000 | O  |
| O11  | 1.0000 | 0.01988 | 0.29819 | 0.74342 | Biso | 1.000 | O  |
| O12  | 1.0000 | 0.40754 | 0.10509 | 0.31282 | Biso | 1.000 | O  |
| O13  | 1.0000 | 0.11992 | 0.16603 | 0.46215 | Biso | 1.000 | O  |
| O14  | 1.0000 | 0.08999 | 0.47231 | 0.64808 | Biso | 1.000 | O  |
| P5   | 1.0000 | 0.37466 | 0.08128 | 0.41197 | Biso | 1.000 | P  |
| O15  | 1.0000 | 0.29017 | 0.11768 | 0.43809 | Biso | 1.000 | O  |
| O16  | 1.0000 | 0.40129 | 0.33039 | 0.10155 | Biso | 1.000 | O  |
| P6   | 1.0000 | 0.04839 | 0.42216 | 0.74225 | Biso | 1.000 | P  |
| Al6  | 1.0000 | 0.48508 | 0.28461 | 0.87415 | Biso | 1.000 | Al |
| O17  | 1.0000 | 0.16240 | 0.17165 | 0.12463 | Biso | 1.000 | O  |
| Al7  | 1.0000 | 0.93307 | 0.62928 | 0.40467 | Biso | 1.000 | Al |
| P7   | 1.0000 | 0.71008 | 0.52307 | 0.86054 | Biso | 1.000 | P  |
| Al8  | 1.0000 | 0.58927 | 0.95090 | 0.73403 | Biso | 1.000 | Al |
| O18  | 1.0000 | 0.70953 | 0.62747 | 0.82474 | Biso | 1.000 | O  |
| O19  | 1.0000 | 0.95605 | 0.74525 | 0.16499 | Biso | 1.000 | O  |
| O20  | 1.0000 | 0.81611 | 0.84167 | 0.12817 | Biso | 1.000 | O  |
| O21  | 1.0000 | 0.56611 | 0.90071 | 0.62287 | Biso | 1.000 | O  |
| O22  | 1.0000 | 0.86597 | 0.89362 | 0.47152 | Biso | 1.000 | O  |
| O23  | 1.0000 | 0.89540 | 0.60053 | 0.29065 | Biso | 1.000 | O  |
| P8   | 1.0000 | 0.59873 | 0.95875 | 0.53049 | Biso | 1.000 | P  |
| O24  | 1.0000 | 0.69652 | 0.95060 | 0.48968 | Biso | 1.000 | O  |
| O25  | 1.0000 | 0.57918 | 0.73389 | 0.85234 | Biso | 1.000 | O  |
| O26  | 1.0000 | 0.80835 | 0.85854 | 0.78858 | Biso | 1.000 | O  |
| P9   | 1.0000 | 0.92638 | 0.62512 | 0.19144 | Biso | 1.000 | P  |
| Al9  | 1.0000 | 0.48399 | 0.74994 | 0.06626 | Biso | 1.000 | Al |
| Si1  | 1.0000 | 0.92935 | 0.84804 | 0.40784 | Biso | 1.000 | Si |
| O27  | 1.0000 | 0.90959 | 0.72971 | 0.45016 | Biso | 1.000 | O  |
| O28  | 1.0000 | 0.68625 | 0.63600 | 0.09100 | Biso | 1.000 | O  |
| O29  | 1.0000 | 0.49753 | 0.89843 | 0.46760 | Biso | 1.000 | O  |
| Al10 | 1.0000 | 0.71471 | 0.75142 | 0.85916 | Biso | 1.000 | Al |
| O30  | 1.0000 | 0.81759 | 0.94596 | 0.64205 | Biso | 1.000 | O  |
| O31  | 1.0000 | 0.82544 | 0.53831 | 0.13649 | Biso | 1.000 | O  |
| P10  | 1.0000 | 0.82050 | 0.96452 | 0.74281 | Biso | 1.000 | P  |
| Al11 | 1.0000 | 0.92155 | 0.84815 | 0.20043 | Biso | 1.000 | Al |
| Al12 | 1.0000 | 0.83042 | 0.97781 | 0.52715 | Biso | 1.000 | Al |
| O32  | 1.0000 | 0.87417 | 0.82526 | 0.30810 | Biso | 1.000 | O  |
| O33  | 1.0000 | 0.85623 | 0.49920 | 0.45878 | Biso | 1.000 | O  |
| O34  | 1.0000 | 0.48726 | 0.84489 | 0.80031 | Biso | 1.000 | O  |
| P11  | 1.0000 | 0.72266 | 0.75942 | 0.06648 | Biso | 1.000 | P  |
| O35  | 1.0000 | 0.62046 | 0.77552 | 0.07876 | Biso | 1.000 | O  |
| O36  | 1.0000 | 0.72387 | 0.98485 | 0.77150 | Biso | 1.000 | O  |
| O37  | 1.0000 | 0.81968 | 0.44432 | 0.62032 | Biso | 1.000 | O  |
| O38  | 1.0000 | 0.48184 | 0.15036 | 0.46674 | Biso | 1.000 | O  |



|      |        |         |         |         |      |       |    |
|------|--------|---------|---------|---------|------|-------|----|
| O39  | 1.0000 | 0.63429 | 0.08349 | 0.54168 | Biso | 1.000 | O  |
| P12  | 1.0000 | 0.82459 | 0.40418 | 0.52536 | Biso | 1.000 | P  |
| O40  | 1.0000 | 0.70805 | 0.30756 | 0.49803 | Biso | 1.000 | O  |
| O41  | 1.0000 | 0.58651 | 0.42767 | 0.86808 | Biso | 1.000 | O  |
| O42  | 1.0000 | 0.52154 | 0.20126 | 0.81156 | Biso | 1.000 | O  |
| AI13 | 1.0000 | 0.72250 | 0.53231 | 0.06533 | Biso | 1.000 | AI |
| O43  | 1.0000 | 0.92783 | 0.12450 | 0.51746 | Biso | 1.000 | O  |
| AI14 | 1.0000 | 0.81544 | 0.41073 | 0.73388 | Biso | 1.000 | AI |
| O44  | 1.0000 | 0.90928 | 0.36112 | 0.52182 | Biso | 1.000 | O  |
| P13  | 1.0000 | 0.59061 | 0.18403 | 0.73965 | Biso | 1.000 | P  |
| O45  | 1.0000 | 0.56712 | 0.06351 | 0.74814 | Biso | 1.000 | O  |
| AI15 | 1.0000 | 0.59306 | 0.18494 | 0.53845 | Biso | 1.000 | AI |
| O46  | 1.0000 | 0.93182 | 0.06533 | 0.77304 | Biso | 1.000 | O  |
| O47  | 1.0000 | 0.77635 | 0.49201 | 0.79636 | Biso | 1.000 | O  |
| P14  | 1.0000 | 0.49011 | 0.29612 | 0.07995 | Biso | 1.000 | P  |
| O48  | 1.0000 | 0.60649 | 0.40036 | 0.08499 | Biso | 1.000 | O  |
| O49  | 1.0000 | 0.71755 | 0.26640 | 0.75186 | Biso | 1.000 | O  |
| O50  | 1.0000 | 0.94442 | 0.42887 | 0.76935 | Biso | 1.000 | O  |
| O51  | 1.0000 | 0.55292 | 0.20198 | 0.64656 | Biso | 1.000 | O  |
| O52  | 1.0000 | 0.45751 | 0.77399 | 0.95634 | Biso | 1.000 | O  |
| O53  | 1.0000 | 0.76632 | 0.54643 | 0.95344 | Biso | 1.000 | O  |
| O54  | 1.0000 | 0.76417 | 0.78466 | 0.96920 | Biso | 1.000 | O  |
| P15  | 1.0000 | 0.38582 | 0.86397 | 0.19272 | Biso | 1.000 | P  |
| O55  | 1.0000 | 0.40653 | 0.97839 | 0.15991 | Biso | 1.000 | O  |
| AI16 | 1.0000 | 0.37617 | 0.86352 | 0.40651 | Biso | 1.000 | AI |
| P16  | 1.0000 | 0.47555 | 0.74872 | 0.85915 | Biso | 1.000 | P  |
| O56  | 1.0000 | 0.37317 | 0.64086 | 0.82514 | Biso | 1.000 | O  |
| O57  | 1.0000 | 0.26191 | 0.77449 | 0.17558 | Biso | 1.000 | O  |
| O58  | 1.0000 | 0.03893 | 0.97971 | 0.17943 | Biso | 1.000 | O  |
| O59  | 1.0000 | 0.18375 | 0.54580 | 0.12439 | Biso | 1.000 | O  |
| O60  | 1.0000 | 0.13235 | 0.52833 | 0.46277 | Biso | 1.000 | O  |
| O61  | 1.0000 | 0.02629 | 0.60880 | 0.16829 | Biso | 1.000 | O  |
| O62  | 1.0000 | 0.41272 | 0.86851 | 0.29329 | Biso | 1.000 | O  |
| O63  | 1.0000 | 0.16909 | 0.59757 | 0.30615 | Biso | 1.000 | O  |
| O64  | 1.0000 | 0.32475 | 0.95415 | 0.43066 | Biso | 1.000 | O  |
| P17  | 1.0000 | 0.16197 | 0.63026 | 0.40383 | Biso | 1.000 | P  |
| O65  | 1.0000 | 0.27941 | 0.72398 | 0.43425 | Biso | 1.000 | O  |
| O66  | 1.0000 | 0.38919 | 0.60882 | 0.09612 | Biso | 1.000 | O  |
| AI17 | 1.0000 | 0.26261 | 0.51260 | 0.86085 | Biso | 1.000 | AI |
| O67  | 1.0000 | 0.06378 | 0.93865 | 0.40152 | Biso | 1.000 | O  |
| O68  | 1.0000 | 0.46622 | 0.83630 | 0.14221 | Biso | 1.000 | O  |
| O69  | 1.0000 | 0.07846 | 0.67254 | 0.41242 | Biso | 1.000 | O  |
| AI18 | 1.0000 | 0.15916 | 0.63271 | 0.19434 | Biso | 1.000 | AI |
| O70  | 1.0000 | 0.24316 | 0.27785 | 0.95771 | Biso | 1.000 | O  |

|     |        |         |         |         |      |       |   |
|-----|--------|---------|---------|---------|------|-------|---|
| O71 | 1.0000 | 0.46756 | 0.24118 | 0.98649 | Biso | 1.000 | O |
| O72 | 1.0000 | 0.24281 | 0.51092 | 0.97617 | Biso | 1.000 | O |
| H1  | 1.0000 | 0.88377 | 0.72010 | 0.58259 | Biso | 1.000 | H |
| H2  | 1.0000 | 0.48603 | 0.33359 | 0.51494 | Biso | 1.000 | H |
| C1  | 1.0000 | 0.61963 | 0.78370 | 0.31155 | Biso | 1.000 | C |
| C2  | 1.0000 | 0.59561 | 0.59127 | 0.34210 | Biso | 1.000 | C |
| H3  | 1.0000 | 0.64736 | 0.60194 | 0.28472 | Biso | 1.000 | H |
| C3  | 1.0000 | 0.56060 | 0.49959 | 0.39629 | Biso | 1.000 | C |
| C4  | 1.0000 | 0.58695 | 0.41112 | 0.36757 | Biso | 1.000 | C |
| C5  | 1.0000 | 0.49759 | 0.48860 | 0.47648 | Biso | 1.000 | C |
| C6  | 1.0000 | 0.47614 | 0.39985 | 0.54440 | Biso | 1.000 | C |
| C7  | 1.0000 | 0.46172 | 0.56460 | 0.49328 | Biso | 1.000 | C |
| C8  | 1.0000 | 0.39493 | 0.56211 | 0.57357 | Biso | 1.000 | C |
| C9  | 1.0000 | 0.49135 | 0.65353 | 0.43205 | Biso | 1.000 | C |
| H4  | 1.0000 | 0.47227 | 0.71783 | 0.44967 | Biso | 1.000 | H |
| C10 | 1.0000 | 0.56213 | 0.67225 | 0.35737 | Biso | 1.000 | C |
| H5  | 1.0000 | 0.63662 | 0.77518 | 0.24254 | Biso | 1.000 | H |
| H6  | 1.0000 | 0.69968 | 0.83492 | 0.34439 | Biso | 1.000 | H |
| H7  | 1.0000 | 0.57174 | 0.82644 | 0.31542 | Biso | 1.000 | H |
| H8  | 1.0000 | 0.50969 | 0.33425 | 0.35100 | Biso | 1.000 | H |
| H9  | 1.0000 | 0.62901 | 0.39051 | 0.41864 | Biso | 1.000 | H |
| H10 | 1.0000 | 0.63983 | 0.43771 | 0.30856 | Biso | 1.000 | H |
| H11 | 1.0000 | 0.38951 | 0.36001 | 0.56768 | Biso | 1.000 | H |
| H12 | 1.0000 | 0.45029 | 0.61028 | 0.62845 | Biso | 1.000 | H |
| H13 | 1.0000 | 0.33991 | 0.47747 | 0.59790 | Biso | 1.000 | H |
| H14 | 1.0000 | 0.34415 | 0.60013 | 0.55811 | Biso | 1.000 | H |
| C11 | 1.0000 | 0.40888 | 0.59561 | 0.32090 | Biso | 1.000 | C |
| H15 | 1.0000 | 0.43779 | 0.61743 | 0.25303 | Biso | 1.000 | H |
| H16 | 1.0000 | 0.37201 | 0.50686 | 0.33330 | Biso | 1.000 | H |
| H17 | 1.0000 | 0.35544 | 0.62906 | 0.33797 | Biso | 1.000 | H |
| C12 | 1.0000 | 0.55609 | 0.45100 | 0.62425 | Biso | 1.000 | C |
| O73 | 1.0000 | 0.86726 | 0.69763 | 0.64471 | Biso | 1.000 | O |
| H18 | 1.0000 | 0.54284 | 0.38459 | 0.67017 | Biso | 1.000 | H |
| H19 | 1.0000 | 0.64346 | 0.49456 | 0.60325 | Biso | 1.000 | H |
| H20 | 1.0000 | 0.54138 | 0.51086 | 0.66046 | Biso | 1.000 | H |
| H21 | 1.0000 | 0.86576 | 0.75970 | 0.67335 | Biso | 1.000 | H |

TS-MS2/C2 in TMB-based pathway

data\_image0

\_cell\_length\_a 13.8042  
 \_cell\_length\_b 13.8042  
 \_cell\_length\_c 15.044  
 \_cell\_angle\_alpha 90  
 \_cell\_angle\_beta 90  
 \_cell\_angle\_gamma 120

\_symmetry\_space\_group\_name\_H-M P 1

\_symmetry\_int\_tables\_number 1

loop\_

\_symmetry\_equiv\_pos\_as\_xyz  
 'x, y, z'

loop\_

\_atom\_site\_label  
 \_atom\_site\_occupancy  
 \_atom\_site\_fract\_x  
 \_atom\_site\_fract\_y  
 \_atom\_site\_fract\_z  
 \_atom\_site\_thermal\_displace\_type  
 \_atom\_site\_B\_iso\_or\_equiv  
 \_atom\_site\_type\_symbol

|     |        |         |         |         |      |       |    |
|-----|--------|---------|---------|---------|------|-------|----|
| P1  | 1.0000 | 0.05377 | 0.19491 | 0.52801 | Biso | 1.000 | P  |
| O1  | 1.0000 | 0.09231 | 0.32026 | 0.51309 | Biso | 1.000 | O  |
| O2  | 1.0000 | 0.29999 | 0.41361 | 0.82870 | Biso | 1.000 | O  |
| O3  | 1.0000 | 0.13766 | 0.48803 | 0.81376 | Biso | 1.000 | O  |
| Al1 | 1.0000 | 0.25939 | 0.29252 | 0.07229 | Biso | 1.000 | Al |
| O4  | 1.0000 | 0.17056 | 0.13032 | 0.28751 | Biso | 1.000 | O  |
| Al2 | 1.0000 | 0.04604 | 0.18849 | 0.73667 | Biso | 1.000 | Al |
| P2  | 1.0000 | 0.15320 | 0.08186 | 0.19210 | Biso | 1.000 | P  |
| Al3 | 1.0000 | 0.15218 | 0.07853 | 0.39929 | Biso | 1.000 | Al |
| O5  | 1.0000 | 0.08036 | 0.17730 | 0.62526 | Biso | 1.000 | O  |
| P3  | 1.0000 | 0.26327 | 0.29130 | 0.85604 | Biso | 1.000 | P  |
| O6  | 1.0000 | 0.35694 | 0.26631 | 0.83134 | Biso | 1.000 | O  |
| O7  | 1.0000 | 0.24533 | 0.05161 | 0.17015 | Biso | 1.000 | O  |
| O8  | 1.0000 | 0.48410 | 0.21107 | 0.14771 | Biso | 1.000 | O  |
| Al4 | 1.0000 | 0.05380 | 0.42009 | 0.53976 | Biso | 1.000 | Al |
| O9  | 1.0000 | 0.15750 | 0.20878 | 0.80482 | Biso | 1.000 | O  |
| P4  | 1.0000 | 0.26624 | 0.51785 | 0.07920 | Biso | 1.000 | P  |
| Al5 | 1.0000 | 0.38281 | 0.08599 | 0.19784 | Biso | 1.000 | Al |

|      |        |         |         |         |      |       |    |
|------|--------|---------|---------|---------|------|-------|----|
| O10  | 1.0000 | 0.24303 | 0.40300 | 0.11374 | Biso | 1.000 | O  |
| O11  | 1.0000 | 0.01192 | 0.29617 | 0.74533 | Biso | 1.000 | O  |
| O12  | 1.0000 | 0.40842 | 0.10826 | 0.31268 | Biso | 1.000 | O  |
| O13  | 1.0000 | 0.12297 | 0.16746 | 0.46406 | Biso | 1.000 | O  |
| O14  | 1.0000 | 0.09847 | 0.47088 | 0.64923 | Biso | 1.000 | O  |
| P5   | 1.0000 | 0.37476 | 0.08179 | 0.41153 | Biso | 1.000 | P  |
| O15  | 1.0000 | 0.28909 | 0.11641 | 0.43816 | Biso | 1.000 | O  |
| O16  | 1.0000 | 0.39782 | 0.32753 | 0.09912 | Biso | 1.000 | O  |
| P6   | 1.0000 | 0.04876 | 0.42246 | 0.74252 | Biso | 1.000 | P  |
| AI6  | 1.0000 | 0.48426 | 0.28425 | 0.87238 | Biso | 1.000 | AI |
| O17  | 1.0000 | 0.16064 | 0.17058 | 0.12547 | Biso | 1.000 | O  |
| AI7  | 1.0000 | 0.93180 | 0.62789 | 0.40407 | Biso | 1.000 | AI |
| P7   | 1.0000 | 0.70930 | 0.52364 | 0.85943 | Biso | 1.000 | P  |
| AI8  | 1.0000 | 0.58914 | 0.95168 | 0.73635 | Biso | 1.000 | AI |
| O18  | 1.0000 | 0.70679 | 0.62737 | 0.82465 | Biso | 1.000 | O  |
| O19  | 1.0000 | 0.95439 | 0.74350 | 0.16642 | Biso | 1.000 | O  |
| O20  | 1.0000 | 0.81592 | 0.84133 | 0.12804 | Biso | 1.000 | O  |
| O21  | 1.0000 | 0.56444 | 0.89971 | 0.62561 | Biso | 1.000 | O  |
| O22  | 1.0000 | 0.86043 | 0.88786 | 0.47366 | Biso | 1.000 | O  |
| O23  | 1.0000 | 0.89048 | 0.59692 | 0.29079 | Biso | 1.000 | O  |
| P8   | 1.0000 | 0.59593 | 0.95566 | 0.53235 | Biso | 1.000 | P  |
| O24  | 1.0000 | 0.69274 | 0.94610 | 0.49119 | Biso | 1.000 | O  |
| O25  | 1.0000 | 0.57658 | 0.73279 | 0.85556 | Biso | 1.000 | O  |
| O26  | 1.0000 | 0.80401 | 0.85665 | 0.78608 | Biso | 1.000 | O  |
| P9   | 1.0000 | 0.92422 | 0.62305 | 0.19202 | Biso | 1.000 | P  |
| AI9  | 1.0000 | 0.48300 | 0.74702 | 0.06940 | Biso | 1.000 | AI |
| Si1  | 1.0000 | 0.92589 | 0.84533 | 0.40944 | Biso | 1.000 | Si |
| O27  | 1.0000 | 0.90506 | 0.72575 | 0.45035 | Biso | 1.000 | O  |
| O28  | 1.0000 | 0.68567 | 0.63645 | 0.08965 | Biso | 1.000 | O  |
| O29  | 1.0000 | 0.49360 | 0.89419 | 0.47080 | Biso | 1.000 | O  |
| AI10 | 1.0000 | 0.71289 | 0.75157 | 0.85937 | Biso | 1.000 | AI |
| O30  | 1.0000 | 0.81995 | 0.95216 | 0.64212 | Biso | 1.000 | O  |
| O31  | 1.0000 | 0.82444 | 0.53728 | 0.13543 | Biso | 1.000 | O  |
| P10  | 1.0000 | 0.82021 | 0.96569 | 0.74324 | Biso | 1.000 | P  |
| AI11 | 1.0000 | 0.92047 | 0.84712 | 0.20102 | Biso | 1.000 | AI |
| AI12 | 1.0000 | 0.82839 | 0.97656 | 0.52624 | Biso | 1.000 | AI |
| O32  | 1.0000 | 0.87363 | 0.82496 | 0.30881 | Biso | 1.000 | O  |
| O33  | 1.0000 | 0.86437 | 0.49750 | 0.45913 | Biso | 1.000 | O  |
| O34  | 1.0000 | 0.48933 | 0.84925 | 0.80667 | Biso | 1.000 | O  |
| P11  | 1.0000 | 0.72347 | 0.76012 | 0.06513 | Biso | 1.000 | P  |
| O35  | 1.0000 | 0.62168 | 0.77721 | 0.07512 | Biso | 1.000 | O  |
| O36  | 1.0000 | 0.72469 | 0.98734 | 0.77226 | Biso | 1.000 | O  |
| O37  | 1.0000 | 0.80943 | 0.44182 | 0.61909 | Biso | 1.000 | O  |
| O38  | 1.0000 | 0.48147 | 0.15044 | 0.46703 | Biso | 1.000 | O  |

|      |        |         |         |         |      |       |    |
|------|--------|---------|---------|---------|------|-------|----|
| O39  | 1.0000 | 0.63235 | 0.08090 | 0.54153 | Biso | 1.000 | O  |
| P12  | 1.0000 | 0.82360 | 0.40195 | 0.52651 | Biso | 1.000 | P  |
| O40  | 1.0000 | 0.70973 | 0.30553 | 0.49369 | Biso | 1.000 | O  |
| O41  | 1.0000 | 0.58635 | 0.42657 | 0.86390 | Biso | 1.000 | O  |
| O42  | 1.0000 | 0.51937 | 0.20036 | 0.80921 | Biso | 1.000 | O  |
| AI13 | 1.0000 | 0.72093 | 0.53194 | 0.06504 | Biso | 1.000 | AI |
| O43  | 1.0000 | 0.92630 | 0.12259 | 0.50999 | Biso | 1.000 | O  |
| AI14 | 1.0000 | 0.81533 | 0.41401 | 0.73290 | Biso | 1.000 | AI |
| O44  | 1.0000 | 0.90706 | 0.35749 | 0.53249 | Biso | 1.000 | O  |
| P13  | 1.0000 | 0.59283 | 0.18675 | 0.73924 | Biso | 1.000 | P  |
| O45  | 1.0000 | 0.57064 | 0.06675 | 0.74681 | Biso | 1.000 | O  |
| AI15 | 1.0000 | 0.59429 | 0.18460 | 0.53694 | Biso | 1.000 | AI |
| O46  | 1.0000 | 0.93197 | 0.06400 | 0.77615 | Biso | 1.000 | O  |
| O47  | 1.0000 | 0.77963 | 0.49732 | 0.79586 | Biso | 1.000 | O  |
| P14  | 1.0000 | 0.48856 | 0.29564 | 0.07862 | Biso | 1.000 | P  |
| O48  | 1.0000 | 0.60377 | 0.40118 | 0.08546 | Biso | 1.000 | O  |
| O49  | 1.0000 | 0.71871 | 0.27042 | 0.75537 | Biso | 1.000 | O  |
| O50  | 1.0000 | 0.94790 | 0.43734 | 0.76312 | Biso | 1.000 | O  |
| O51  | 1.0000 | 0.55860 | 0.20623 | 0.64527 | Biso | 1.000 | O  |
| O52  | 1.0000 | 0.45115 | 0.76701 | 0.95963 | Biso | 1.000 | O  |
| O53  | 1.0000 | 0.76339 | 0.54501 | 0.95300 | Biso | 1.000 | O  |
| O54  | 1.0000 | 0.76711 | 0.78572 | 0.96826 | Biso | 1.000 | O  |
| P15  | 1.0000 | 0.38499 | 0.86314 | 0.19352 | Biso | 1.000 | P  |
| O55  | 1.0000 | 0.40497 | 0.97746 | 0.16108 | Biso | 1.000 | O  |
| AI16 | 1.0000 | 0.37533 | 0.86241 | 0.40685 | Biso | 1.000 | AI |
| P16  | 1.0000 | 0.47334 | 0.74857 | 0.86184 | Biso | 1.000 | P  |
| O56  | 1.0000 | 0.37100 | 0.64359 | 0.82319 | Biso | 1.000 | O  |
| O57  | 1.0000 | 0.26097 | 0.77349 | 0.17698 | Biso | 1.000 | O  |
| O58  | 1.0000 | 0.03828 | 0.97807 | 0.17958 | Biso | 1.000 | O  |
| O59  | 1.0000 | 0.18305 | 0.54543 | 0.12450 | Biso | 1.000 | O  |
| O60  | 1.0000 | 0.12441 | 0.52987 | 0.46435 | Biso | 1.000 | O  |
| O61  | 1.0000 | 0.02474 | 0.60708 | 0.17056 | Biso | 1.000 | O  |
| O62  | 1.0000 | 0.41261 | 0.86795 | 0.29398 | Biso | 1.000 | O  |
| O63  | 1.0000 | 0.16837 | 0.59559 | 0.30684 | Biso | 1.000 | O  |
| O64  | 1.0000 | 0.32520 | 0.95450 | 0.42895 | Biso | 1.000 | O  |
| P17  | 1.0000 | 0.15966 | 0.63138 | 0.40324 | Biso | 1.000 | P  |
| O65  | 1.0000 | 0.27737 | 0.72309 | 0.43472 | Biso | 1.000 | O  |
| O66  | 1.0000 | 0.38928 | 0.60674 | 0.10248 | Biso | 1.000 | O  |
| AI17 | 1.0000 | 0.26373 | 0.51449 | 0.86211 | Biso | 1.000 | AI |
| O67  | 1.0000 | 0.06030 | 0.93728 | 0.40547 | Biso | 1.000 | O  |
| O68  | 1.0000 | 0.46546 | 0.83624 | 0.14245 | Biso | 1.000 | O  |
| O69  | 1.0000 | 0.07891 | 0.67743 | 0.40723 | Biso | 1.000 | O  |
| AI18 | 1.0000 | 0.15834 | 0.63163 | 0.19506 | Biso | 1.000 | AI |
| O70  | 1.0000 | 0.23772 | 0.27600 | 0.95669 | Biso | 1.000 | O  |

|     |        |         |         |         |      |       |   |
|-----|--------|---------|---------|---------|------|-------|---|
| O71 | 1.0000 | 0.46923 | 0.24230 | 0.98480 | Biso | 1.000 | O |
| O72 | 1.0000 | 0.24789 | 0.51396 | 0.97784 | Biso | 1.000 | O |
| H1  | 1.0000 | 0.88930 | 0.72005 | 0.58555 | Biso | 1.000 | H |
| H2  | 1.0000 | 0.48792 | 0.33296 | 0.50382 | Biso | 1.000 | H |
| C1  | 1.0000 | 0.62044 | 0.78933 | 0.30353 | Biso | 1.000 | C |
| C2  | 1.0000 | 0.60642 | 0.60295 | 0.33818 | Biso | 1.000 | C |
| H3  | 1.0000 | 0.66679 | 0.61827 | 0.28629 | Biso | 1.000 | H |
| C3  | 1.0000 | 0.56796 | 0.50465 | 0.39025 | Biso | 1.000 | C |
| C4  | 1.0000 | 0.60226 | 0.42179 | 0.36134 | Biso | 1.000 | C |
| C5  | 1.0000 | 0.49943 | 0.48668 | 0.46408 | Biso | 1.000 | C |
| C6  | 1.0000 | 0.47394 | 0.39724 | 0.53211 | Biso | 1.000 | C |
| C7  | 1.0000 | 0.45261 | 0.55863 | 0.47555 | Biso | 1.000 | C |
| C8  | 1.0000 | 0.39128 | 0.55940 | 0.55875 | Biso | 1.000 | C |
| C9  | 1.0000 | 0.48830 | 0.65211 | 0.41662 | Biso | 1.000 | C |
| H4  | 1.0000 | 0.46015 | 0.71029 | 0.43160 | Biso | 1.000 | H |
| C10 | 1.0000 | 0.57224 | 0.68011 | 0.35169 | Biso | 1.000 | C |
| H5  | 1.0000 | 0.64134 | 0.78159 | 0.23555 | Biso | 1.000 | H |
| H6  | 1.0000 | 0.69805 | 0.85015 | 0.33578 | Biso | 1.000 | H |
| H7  | 1.0000 | 0.56394 | 0.82260 | 0.30384 | Biso | 1.000 | H |
| H8  | 1.0000 | 0.52891 | 0.34462 | 0.33878 | Biso | 1.000 | H |
| H9  | 1.0000 | 0.64049 | 0.39915 | 0.41426 | Biso | 1.000 | H |
| H10 | 1.0000 | 0.66110 | 0.45440 | 0.30621 | Biso | 1.000 | H |
| H11 | 1.0000 | 0.38535 | 0.35488 | 0.55048 | Biso | 1.000 | H |
| H12 | 1.0000 | 0.45296 | 0.60720 | 0.61009 | Biso | 1.000 | H |
| H13 | 1.0000 | 0.33551 | 0.47591 | 0.58467 | Biso | 1.000 | H |
| H14 | 1.0000 | 0.34341 | 0.60126 | 0.54671 | Biso | 1.000 | H |
| C11 | 1.0000 | 0.34969 | 0.51808 | 0.37755 | Biso | 1.000 | C |
| H15 | 1.0000 | 0.38061 | 0.48456 | 0.32714 | Biso | 1.000 | H |
| H16 | 1.0000 | 0.28414 | 0.45416 | 0.41865 | Biso | 1.000 | H |
| H17 | 1.0000 | 0.32189 | 0.57298 | 0.35130 | Biso | 1.000 | H |
| C12 | 1.0000 | 0.54682 | 0.44582 | 0.61624 | Biso | 1.000 | C |
| O73 | 1.0000 | 0.88177 | 0.70135 | 0.64859 | Biso | 1.000 | O |
| H18 | 1.0000 | 0.52868 | 0.37796 | 0.66226 | Biso | 1.000 | H |
| H19 | 1.0000 | 0.63575 | 0.48862 | 0.59994 | Biso | 1.000 | H |
| H20 | 1.0000 | 0.53026 | 0.50550 | 0.65071 | Biso | 1.000 | H |
| H21 | 1.0000 | 0.87242 | 0.75923 | 0.67682 | Biso | 1.000 | H |

TS-MS3/C2 in TMB-based pathway

data\_image0

\_cell\_length\_a 13.8042  
 \_cell\_length\_b 13.8042  
 \_cell\_length\_c 15.044  
 \_cell\_angle\_alpha 90  
 \_cell\_angle\_beta 90  
 \_cell\_angle\_gamma 120

\_symmetry\_space\_group\_name\_H-M P 1

\_symmetry\_int\_tables\_number 1

loop\_

\_symmetry\_equiv\_pos\_as\_xyz  
 'x, y, z'

loop\_

\_atom\_site\_label  
 \_atom\_site\_occupancy  
 \_atom\_site\_fract\_x  
 \_atom\_site\_fract\_y  
 \_atom\_site\_fract\_z  
 \_atom\_site\_thermal\_displace\_type  
 \_atom\_site\_B\_iso\_or\_equiv  
 \_atom\_site\_type\_symbol

|     |        |         |         |         |      |       |    |
|-----|--------|---------|---------|---------|------|-------|----|
| P1  | 1.0000 | 0.05434 | 0.19238 | 0.53116 | Biso | 1.000 | P  |
| O1  | 1.0000 | 0.09023 | 0.31743 | 0.51991 | Biso | 1.000 | O  |
| O2  | 1.0000 | 0.29982 | 0.41000 | 0.82801 | Biso | 1.000 | O  |
| O3  | 1.0000 | 0.14057 | 0.48897 | 0.81131 | Biso | 1.000 | O  |
| Al1 | 1.0000 | 0.26377 | 0.29238 | 0.07398 | Biso | 1.000 | Al |
| O4  | 1.0000 | 0.16326 | 0.12840 | 0.28806 | Biso | 1.000 | O  |
| Al2 | 1.0000 | 0.04530 | 0.18715 | 0.73824 | Biso | 1.000 | Al |
| P2  | 1.0000 | 0.15342 | 0.07999 | 0.19332 | Biso | 1.000 | P  |
| Al3 | 1.0000 | 0.15140 | 0.07893 | 0.39990 | Biso | 1.000 | Al |
| O5  | 1.0000 | 0.08076 | 0.17233 | 0.62784 | Biso | 1.000 | O  |
| P3  | 1.0000 | 0.26308 | 0.28808 | 0.85675 | Biso | 1.000 | P  |
| O6  | 1.0000 | 0.35450 | 0.26085 | 0.82875 | Biso | 1.000 | O  |
| O7  | 1.0000 | 0.24750 | 0.05081 | 0.17794 | Biso | 1.000 | O  |
| O8  | 1.0000 | 0.48457 | 0.20880 | 0.14734 | Biso | 1.000 | O  |
| Al4 | 1.0000 | 0.05115 | 0.41828 | 0.53911 | Biso | 1.000 | Al |
| O9  | 1.0000 | 0.15354 | 0.20545 | 0.80971 | Biso | 1.000 | O  |
| P4  | 1.0000 | 0.26469 | 0.51454 | 0.07891 | Biso | 1.000 | P  |
| Al5 | 1.0000 | 0.38603 | 0.08479 | 0.20009 | Biso | 1.000 | Al |

|      |        |         |         |         |      |       |    |
|------|--------|---------|---------|---------|------|-------|----|
| O10  | 1.0000 | 0.24325 | 0.40060 | 0.11429 | Biso | 1.000 | O  |
| O11  | 1.0000 | 0.01408 | 0.29713 | 0.74331 | Biso | 1.000 | O  |
| O12  | 1.0000 | 0.41802 | 0.10937 | 0.31431 | Biso | 1.000 | O  |
| O13  | 1.0000 | 0.12672 | 0.17022 | 0.46612 | Biso | 1.000 | O  |
| O14  | 1.0000 | 0.08989 | 0.47216 | 0.64861 | Biso | 1.000 | O  |
| P5   | 1.0000 | 0.37529 | 0.08073 | 0.41127 | Biso | 1.000 | P  |
| O15  | 1.0000 | 0.29115 | 0.11950 | 0.43228 | Biso | 1.000 | O  |
| O16  | 1.0000 | 0.40313 | 0.33101 | 0.10269 | Biso | 1.000 | O  |
| P6   | 1.0000 | 0.04772 | 0.42263 | 0.74303 | Biso | 1.000 | P  |
| AI6  | 1.0000 | 0.48276 | 0.28419 | 0.87302 | Biso | 1.000 | AI |
| O17  | 1.0000 | 0.16476 | 0.16851 | 0.12486 | Biso | 1.000 | O  |
| AI7  | 1.0000 | 0.93107 | 0.62454 | 0.40166 | Biso | 1.000 | AI |
| P7   | 1.0000 | 0.70535 | 0.52087 | 0.85829 | Biso | 1.000 | P  |
| AI8  | 1.0000 | 0.58562 | 0.94893 | 0.73652 | Biso | 1.000 | AI |
| O18  | 1.0000 | 0.70878 | 0.62712 | 0.82243 | Biso | 1.000 | O  |
| O19  | 1.0000 | 0.95659 | 0.74094 | 0.16667 | Biso | 1.000 | O  |
| O20  | 1.0000 | 0.81701 | 0.83830 | 0.12881 | Biso | 1.000 | O  |
| O21  | 1.0000 | 0.56035 | 0.89797 | 0.62543 | Biso | 1.000 | O  |
| O22  | 1.0000 | 0.85649 | 0.88224 | 0.47360 | Biso | 1.000 | O  |
| O23  | 1.0000 | 0.88375 | 0.59210 | 0.28946 | Biso | 1.000 | O  |
| P8   | 1.0000 | 0.59631 | 0.95848 | 0.53396 | Biso | 1.000 | P  |
| O24  | 1.0000 | 0.69220 | 0.94716 | 0.49305 | Biso | 1.000 | O  |
| O25  | 1.0000 | 0.57824 | 0.73182 | 0.85528 | Biso | 1.000 | O  |
| O26  | 1.0000 | 0.80564 | 0.85719 | 0.78836 | Biso | 1.000 | O  |
| P9   | 1.0000 | 0.92553 | 0.62017 | 0.19229 | Biso | 1.000 | P  |
| AI9  | 1.0000 | 0.48365 | 0.74497 | 0.07099 | Biso | 1.000 | AI |
| Si1  | 1.0000 | 0.92703 | 0.84393 | 0.41068 | Biso | 1.000 | Si |
| O27  | 1.0000 | 0.91031 | 0.72544 | 0.44997 | Biso | 1.000 | O  |
| O28  | 1.0000 | 0.68913 | 0.63275 | 0.09211 | Biso | 1.000 | O  |
| O29  | 1.0000 | 0.49527 | 0.90452 | 0.47058 | Biso | 1.000 | O  |
| AI10 | 1.0000 | 0.71406 | 0.75016 | 0.86000 | Biso | 1.000 | AI |
| O30  | 1.0000 | 0.81886 | 0.94892 | 0.64299 | Biso | 1.000 | O  |
| O31  | 1.0000 | 0.83127 | 0.53554 | 0.13067 | Biso | 1.000 | O  |
| P10  | 1.0000 | 0.81837 | 0.96408 | 0.74391 | Biso | 1.000 | P  |
| AI11 | 1.0000 | 0.92258 | 0.84461 | 0.20082 | Biso | 1.000 | AI |
| AI12 | 1.0000 | 0.82680 | 0.97260 | 0.52689 | Biso | 1.000 | AI |
| O32  | 1.0000 | 0.87756 | 0.82437 | 0.30910 | Biso | 1.000 | O  |
| O33  | 1.0000 | 0.85620 | 0.49732 | 0.45985 | Biso | 1.000 | O  |
| O34  | 1.0000 | 0.48760 | 0.84579 | 0.80717 | Biso | 1.000 | O  |
| P11  | 1.0000 | 0.72371 | 0.75554 | 0.06724 | Biso | 1.000 | P  |
| O35  | 1.0000 | 0.62071 | 0.77030 | 0.07903 | Biso | 1.000 | O  |
| O36  | 1.0000 | 0.72097 | 0.98333 | 0.77179 | Biso | 1.000 | O  |
| O37  | 1.0000 | 0.81532 | 0.43841 | 0.62039 | Biso | 1.000 | O  |
| O38  | 1.0000 | 0.47683 | 0.14512 | 0.47290 | Biso | 1.000 | O  |



|      |        |         |         |         |      |       |    |
|------|--------|---------|---------|---------|------|-------|----|
| O39  | 1.0000 | 0.63648 | 0.08434 | 0.54731 | Biso | 1.000 | O  |
| P12  | 1.0000 | 0.82151 | 0.40052 | 0.52498 | Biso | 1.000 | P  |
| O40  | 1.0000 | 0.70506 | 0.30556 | 0.49531 | Biso | 1.000 | O  |
| O41  | 1.0000 | 0.58029 | 0.42861 | 0.86587 | Biso | 1.000 | O  |
| O42  | 1.0000 | 0.52545 | 0.20381 | 0.81353 | Biso | 1.000 | O  |
| AI13 | 1.0000 | 0.72424 | 0.52907 | 0.06391 | Biso | 1.000 | AI |
| O43  | 1.0000 | 0.92770 | 0.11811 | 0.51130 | Biso | 1.000 | O  |
| AI14 | 1.0000 | 0.81454 | 0.40873 | 0.73440 | Biso | 1.000 | AI |
| O44  | 1.0000 | 0.90564 | 0.35661 | 0.52219 | Biso | 1.000 | O  |
| P13  | 1.0000 | 0.59270 | 0.18471 | 0.74128 | Biso | 1.000 | P  |
| O45  | 1.0000 | 0.56458 | 0.06262 | 0.74834 | Biso | 1.000 | O  |
| AI15 | 1.0000 | 0.59261 | 0.18387 | 0.54041 | Biso | 1.000 | AI |
| O46  | 1.0000 | 0.92846 | 0.06460 | 0.77671 | Biso | 1.000 | O  |
| O47  | 1.0000 | 0.76817 | 0.48605 | 0.79378 | Biso | 1.000 | O  |
| P14  | 1.0000 | 0.49038 | 0.29502 | 0.07946 | Biso | 1.000 | P  |
| O48  | 1.0000 | 0.60809 | 0.39750 | 0.08492 | Biso | 1.000 | O  |
| O49  | 1.0000 | 0.72026 | 0.26372 | 0.75413 | Biso | 1.000 | O  |
| O50  | 1.0000 | 0.94663 | 0.43479 | 0.76997 | Biso | 1.000 | O  |
| O51  | 1.0000 | 0.55706 | 0.20678 | 0.64867 | Biso | 1.000 | O  |
| O52  | 1.0000 | 0.45435 | 0.76628 | 0.96074 | Biso | 1.000 | O  |
| O53  | 1.0000 | 0.76237 | 0.54276 | 0.95070 | Biso | 1.000 | O  |
| O54  | 1.0000 | 0.76517 | 0.78070 | 0.96977 | Biso | 1.000 | O  |
| P15  | 1.0000 | 0.38654 | 0.86101 | 0.19411 | Biso | 1.000 | P  |
| O55  | 1.0000 | 0.40515 | 0.97504 | 0.16189 | Biso | 1.000 | O  |
| AI16 | 1.0000 | 0.37379 | 0.86186 | 0.40752 | Biso | 1.000 | AI |
| P16  | 1.0000 | 0.47460 | 0.74657 | 0.86279 | Biso | 1.000 | P  |
| O56  | 1.0000 | 0.37299 | 0.64049 | 0.82502 | Biso | 1.000 | O  |
| O57  | 1.0000 | 0.26358 | 0.77026 | 0.17493 | Biso | 1.000 | O  |
| O58  | 1.0000 | 0.04010 | 0.97522 | 0.17728 | Biso | 1.000 | O  |
| O59  | 1.0000 | 0.17900 | 0.53982 | 0.12269 | Biso | 1.000 | O  |
| O60  | 1.0000 | 0.13013 | 0.52576 | 0.46331 | Biso | 1.000 | O  |
| O61  | 1.0000 | 0.02797 | 0.60543 | 0.17796 | Biso | 1.000 | O  |
| O62  | 1.0000 | 0.41139 | 0.86518 | 0.29498 | Biso | 1.000 | O  |
| O63  | 1.0000 | 0.18188 | 0.59554 | 0.30711 | Biso | 1.000 | O  |
| O64  | 1.0000 | 0.32048 | 0.95256 | 0.42681 | Biso | 1.000 | O  |
| P17  | 1.0000 | 0.16389 | 0.62742 | 0.40238 | Biso | 1.000 | P  |
| O65  | 1.0000 | 0.27618 | 0.72382 | 0.43884 | Biso | 1.000 | O  |
| O66  | 1.0000 | 0.38670 | 0.60524 | 0.10286 | Biso | 1.000 | O  |
| AI17 | 1.0000 | 0.26432 | 0.51145 | 0.86176 | Biso | 1.000 | AI |
| O67  | 1.0000 | 0.06065 | 0.93837 | 0.41027 | Biso | 1.000 | O  |
| O68  | 1.0000 | 0.46951 | 0.83654 | 0.14404 | Biso | 1.000 | O  |
| O69  | 1.0000 | 0.07624 | 0.66524 | 0.40129 | Biso | 1.000 | O  |
| AI18 | 1.0000 | 0.16235 | 0.62876 | 0.19659 | Biso | 1.000 | AI |
| O70  | 1.0000 | 0.24417 | 0.27586 | 0.95820 | Biso | 1.000 | O  |

|     |        |         |         |         |      |       |   |
|-----|--------|---------|---------|---------|------|-------|---|
| O71 | 1.0000 | 0.46590 | 0.24165 | 0.98543 | Biso | 1.000 | O |
| O72 | 1.0000 | 0.24763 | 0.50939 | 0.97732 | Biso | 1.000 | O |
| H1  | 1.0000 | 0.88600 | 0.71434 | 0.58485 | Biso | 1.000 | H |
| H2  | 1.0000 | 0.47503 | 0.33076 | 0.49870 | Biso | 1.000 | H |
| C1  | 1.0000 | 0.62485 | 0.79695 | 0.31140 | Biso | 1.000 | C |
| C2  | 1.0000 | 0.60029 | 0.60531 | 0.33949 | Biso | 1.000 | C |
| H3  | 1.0000 | 0.65746 | 0.62169 | 0.28474 | Biso | 1.000 | H |
| C3  | 1.0000 | 0.55927 | 0.50578 | 0.38454 | Biso | 1.000 | C |
| C4  | 1.0000 | 0.58688 | 0.41885 | 0.35370 | Biso | 1.000 | C |
| C5  | 1.0000 | 0.48613 | 0.48526 | 0.45996 | Biso | 1.000 | C |
| C6  | 1.0000 | 0.47032 | 0.39959 | 0.52916 | Biso | 1.000 | C |
| C7  | 1.0000 | 0.44718 | 0.56281 | 0.47717 | Biso | 1.000 | C |
| C8  | 1.0000 | 0.39095 | 0.56378 | 0.56362 | Biso | 1.000 | C |
| C9  | 1.0000 | 0.49373 | 0.66428 | 0.42631 | Biso | 1.000 | C |
| H4  | 1.0000 | 0.46772 | 0.72337 | 0.44376 | Biso | 1.000 | H |
| C10 | 1.0000 | 0.57112 | 0.68820 | 0.36063 | Biso | 1.000 | C |
| H5  | 1.0000 | 0.62373 | 0.78290 | 0.24033 | Biso | 1.000 | H |
| H6  | 1.0000 | 0.71250 | 0.84582 | 0.33063 | Biso | 1.000 | H |
| H7  | 1.0000 | 0.58420 | 0.84527 | 0.32473 | Biso | 1.000 | H |
| H8  | 1.0000 | 0.51067 | 0.34179 | 0.33513 | Biso | 1.000 | H |
| H9  | 1.0000 | 0.62865 | 0.39673 | 0.40437 | Biso | 1.000 | H |
| H10 | 1.0000 | 0.64124 | 0.44846 | 0.29569 | Biso | 1.000 | H |
| H11 | 1.0000 | 0.38799 | 0.36318 | 0.56013 | Biso | 1.000 | H |
| H12 | 1.0000 | 0.45545 | 0.61606 | 0.61172 | Biso | 1.000 | H |
| H13 | 1.0000 | 0.33998 | 0.48130 | 0.59293 | Biso | 1.000 | H |
| H14 | 1.0000 | 0.33895 | 0.60154 | 0.55313 | Biso | 1.000 | H |
| C11 | 1.0000 | 0.34023 | 0.44788 | 0.40293 | Biso | 1.000 | C |
| H15 | 1.0000 | 0.36377 | 0.47819 | 0.33558 | Biso | 1.000 | H |
| H16 | 1.0000 | 0.31777 | 0.36096 | 0.41119 | Biso | 1.000 | H |
| H17 | 1.0000 | 0.27378 | 0.45944 | 0.42956 | Biso | 1.000 | H |
| C12 | 1.0000 | 0.56164 | 0.45660 | 0.60098 | Biso | 1.000 | C |
| O73 | 1.0000 | 0.87179 | 0.69311 | 0.64732 | Biso | 1.000 | O |
| H18 | 1.0000 | 0.55331 | 0.39406 | 0.64918 | Biso | 1.000 | H |
| H19 | 1.0000 | 0.64572 | 0.49593 | 0.57302 | Biso | 1.000 | H |
| H20 | 1.0000 | 0.55368 | 0.52106 | 0.63659 | Biso | 1.000 | H |
| H21 | 1.0000 | 0.86535 | 0.75299 | 0.67500 | Biso | 1.000 | H |

TS9-10/C2 in TMB-based pathway

data\_image0

\_cell\_length\_a 13.8042  
 \_cell\_length\_b 13.8042  
 \_cell\_length\_c 15.044  
 \_cell\_angle\_alpha 90  
 \_cell\_angle\_beta 90  
 \_cell\_angle\_gamma 120

\_symmetry\_space\_group\_name\_H-M P 1

\_symmetry\_int\_tables\_number 1

loop\_

\_symmetry\_equiv\_pos\_as\_xyz  
 'x, y, z'

loop\_

\_atom\_site\_label  
 \_atom\_site\_occupancy  
 \_atom\_site\_fract\_x  
 \_atom\_site\_fract\_y  
 \_atom\_site\_fract\_z  
 \_atom\_site\_thermal\_displace\_type  
 \_atom\_site\_B\_iso\_or\_equiv  
 \_atom\_site\_type\_symbol

|     |        |         |         |         |      |       |    |
|-----|--------|---------|---------|---------|------|-------|----|
| P1  | 1.0000 | 0.05268 | 0.19113 | 0.52996 | Biso | 1.000 | P  |
| O1  | 1.0000 | 0.08689 | 0.31460 | 0.51363 | Biso | 1.000 | O  |
| O2  | 1.0000 | 0.29393 | 0.40749 | 0.82524 | Biso | 1.000 | O  |
| O3  | 1.0000 | 0.14188 | 0.49291 | 0.80437 | Biso | 1.000 | O  |
| Al1 | 1.0000 | 0.26244 | 0.29007 | 0.07234 | Biso | 1.000 | Al |
| O4  | 1.0000 | 0.16558 | 0.12734 | 0.28465 | Biso | 1.000 | O  |
| Al2 | 1.0000 | 0.04939 | 0.18755 | 0.73510 | Biso | 1.000 | Al |
| P2  | 1.0000 | 0.15238 | 0.07577 | 0.19079 | Biso | 1.000 | P  |
| Al3 | 1.0000 | 0.15050 | 0.07673 | 0.39594 | Biso | 1.000 | Al |
| O5  | 1.0000 | 0.09016 | 0.17882 | 0.62507 | Biso | 1.000 | O  |
| P3  | 1.0000 | 0.26281 | 0.28739 | 0.85456 | Biso | 1.000 | P  |
| O6  | 1.0000 | 0.35698 | 0.26508 | 0.82464 | Biso | 1.000 | O  |
| O7  | 1.0000 | 0.24319 | 0.04190 | 0.17586 | Biso | 1.000 | O  |
| O8  | 1.0000 | 0.47936 | 0.20361 | 0.14447 | Biso | 1.000 | O  |
| Al4 | 1.0000 | 0.04581 | 0.41356 | 0.53431 | Biso | 1.000 | Al |
| O9  | 1.0000 | 0.15334 | 0.20069 | 0.80923 | Biso | 1.000 | O  |
| P4  | 1.0000 | 0.25963 | 0.51047 | 0.07554 | Biso | 1.000 | P  |
| Al5 | 1.0000 | 0.38308 | 0.07988 | 0.19896 | Biso | 1.000 | Al |

|      |        |         |         |         |      |       |    |
|------|--------|---------|---------|---------|------|-------|----|
| O10  | 1.0000 | 0.23594 | 0.39533 | 0.10955 | Biso | 1.000 | O  |
| O11  | 1.0000 | 0.01691 | 0.29610 | 0.74364 | Biso | 1.000 | O  |
| O12  | 1.0000 | 0.41428 | 0.10390 | 0.31336 | Biso | 1.000 | O  |
| O13  | 1.0000 | 0.11350 | 0.15931 | 0.46113 | Biso | 1.000 | O  |
| O14  | 1.0000 | 0.08057 | 0.46604 | 0.64430 | Biso | 1.000 | O  |
| P5   | 1.0000 | 0.37162 | 0.07424 | 0.41027 | Biso | 1.000 | P  |
| O15  | 1.0000 | 0.28640 | 0.11117 | 0.43207 | Biso | 1.000 | O  |
| O16  | 1.0000 | 0.40200 | 0.33029 | 0.10172 | Biso | 1.000 | O  |
| P6   | 1.0000 | 0.04613 | 0.42022 | 0.74019 | Biso | 1.000 | P  |
| Al6  | 1.0000 | 0.48251 | 0.28406 | 0.87083 | Biso | 1.000 | Al |
| O17  | 1.0000 | 0.16533 | 0.16331 | 0.12079 | Biso | 1.000 | O  |
| Al7  | 1.0000 | 0.93180 | 0.62509 | 0.40084 | Biso | 1.000 | Al |
| P7   | 1.0000 | 0.70869 | 0.52059 | 0.85793 | Biso | 1.000 | P  |
| Al8  | 1.0000 | 0.58607 | 0.94831 | 0.73496 | Biso | 1.000 | Al |
| O18  | 1.0000 | 0.71313 | 0.62807 | 0.82316 | Biso | 1.000 | O  |
| O19  | 1.0000 | 0.95592 | 0.73839 | 0.16450 | Biso | 1.000 | O  |
| O20  | 1.0000 | 0.81387 | 0.83425 | 0.13095 | Biso | 1.000 | O  |
| O21  | 1.0000 | 0.56003 | 0.89850 | 0.62386 | Biso | 1.000 | O  |
| O22  | 1.0000 | 0.86140 | 0.88656 | 0.47178 | Biso | 1.000 | O  |
| O23  | 1.0000 | 0.88193 | 0.59355 | 0.28994 | Biso | 1.000 | O  |
| P8   | 1.0000 | 0.59654 | 0.96028 | 0.53288 | Biso | 1.000 | P  |
| O24  | 1.0000 | 0.69359 | 0.94982 | 0.49313 | Biso | 1.000 | O  |
| O25  | 1.0000 | 0.57887 | 0.72898 | 0.85253 | Biso | 1.000 | O  |
| O26  | 1.0000 | 0.80785 | 0.85868 | 0.79293 | Biso | 1.000 | O  |
| P9   | 1.0000 | 0.92405 | 0.61801 | 0.19249 | Biso | 1.000 | P  |
| Al9  | 1.0000 | 0.48109 | 0.73948 | 0.07104 | Biso | 1.000 | Al |
| Si1  | 1.0000 | 0.92825 | 0.84429 | 0.40829 | Biso | 1.000 | Si |
| O27  | 1.0000 | 0.91262 | 0.72700 | 0.45351 | Biso | 1.000 | O  |
| O28  | 1.0000 | 0.68746 | 0.62815 | 0.09263 | Biso | 1.000 | O  |
| O29  | 1.0000 | 0.49673 | 0.90719 | 0.46869 | Biso | 1.000 | O  |
| Al10 | 1.0000 | 0.71495 | 0.74941 | 0.86236 | Biso | 1.000 | Al |
| O30  | 1.0000 | 0.81459 | 0.93290 | 0.64181 | Biso | 1.000 | O  |
| O31  | 1.0000 | 0.82998 | 0.53179 | 0.13166 | Biso | 1.000 | O  |
| P10  | 1.0000 | 0.81864 | 0.96070 | 0.74145 | Biso | 1.000 | P  |
| Al11 | 1.0000 | 0.92091 | 0.84080 | 0.20037 | Biso | 1.000 | Al |
| Al12 | 1.0000 | 0.82590 | 0.97180 | 0.52761 | Biso | 1.000 | Al |
| O32  | 1.0000 | 0.87522 | 0.81692 | 0.30876 | Biso | 1.000 | O  |
| O33  | 1.0000 | 0.85480 | 0.50062 | 0.46244 | Biso | 1.000 | O  |
| O34  | 1.0000 | 0.49050 | 0.84527 | 0.80688 | Biso | 1.000 | O  |
| P11  | 1.0000 | 0.72098 | 0.75094 | 0.06957 | Biso | 1.000 | P  |
| O35  | 1.0000 | 0.61750 | 0.76421 | 0.08144 | Biso | 1.000 | O  |
| O36  | 1.0000 | 0.72343 | 0.98429 | 0.76686 | Biso | 1.000 | O  |
| O37  | 1.0000 | 0.81231 | 0.43723 | 0.62093 | Biso | 1.000 | O  |
| O38  | 1.0000 | 0.47268 | 0.13899 | 0.47247 | Biso | 1.000 | O  |

|      |        |         |         |         |      |       |    |
|------|--------|---------|---------|---------|------|-------|----|
| O39  | 1.0000 | 0.63668 | 0.08619 | 0.54678 | Biso | 1.000 | O  |
| P12  | 1.0000 | 0.81741 | 0.40002 | 0.52434 | Biso | 1.000 | P  |
| O40  | 1.0000 | 0.69945 | 0.30852 | 0.49427 | Biso | 1.000 | O  |
| O41  | 1.0000 | 0.58390 | 0.42745 | 0.86117 | Biso | 1.000 | O  |
| O42  | 1.0000 | 0.52104 | 0.19918 | 0.81291 | Biso | 1.000 | O  |
| AI13 | 1.0000 | 0.72273 | 0.52480 | 0.06497 | Biso | 1.000 | AI |
| O43  | 1.0000 | 0.92362 | 0.11786 | 0.52150 | Biso | 1.000 | O  |
| AI14 | 1.0000 | 0.81306 | 0.40485 | 0.73469 | Biso | 1.000 | AI |
| O44  | 1.0000 | 0.89909 | 0.35350 | 0.51959 | Biso | 1.000 | O  |
| P13  | 1.0000 | 0.59008 | 0.18273 | 0.74068 | Biso | 1.000 | P  |
| O45  | 1.0000 | 0.56263 | 0.06072 | 0.74596 | Biso | 1.000 | O  |
| AI15 | 1.0000 | 0.58975 | 0.18358 | 0.53905 | Biso | 1.000 | AI |
| O46  | 1.0000 | 0.93079 | 0.06283 | 0.76762 | Biso | 1.000 | O  |
| O47  | 1.0000 | 0.77517 | 0.49093 | 0.79229 | Biso | 1.000 | O  |
| P14  | 1.0000 | 0.48784 | 0.29261 | 0.07840 | Biso | 1.000 | P  |
| O48  | 1.0000 | 0.60650 | 0.39337 | 0.08526 | Biso | 1.000 | O  |
| O49  | 1.0000 | 0.71738 | 0.26159 | 0.75629 | Biso | 1.000 | O  |
| O50  | 1.0000 | 0.94380 | 0.42864 | 0.77026 | Biso | 1.000 | O  |
| O51  | 1.0000 | 0.55757 | 0.20857 | 0.64818 | Biso | 1.000 | O  |
| O52  | 1.0000 | 0.45760 | 0.76477 | 0.96011 | Biso | 1.000 | O  |
| O53  | 1.0000 | 0.76210 | 0.53872 | 0.95134 | Biso | 1.000 | O  |
| O54  | 1.0000 | 0.76352 | 0.77775 | 0.97225 | Biso | 1.000 | O  |
| P15  | 1.0000 | 0.38423 | 0.85670 | 0.19311 | Biso | 1.000 | P  |
| O55  | 1.0000 | 0.40541 | 0.97193 | 0.16159 | Biso | 1.000 | O  |
| AI16 | 1.0000 | 0.37303 | 0.85664 | 0.40691 | Biso | 1.000 | AI |
| P16  | 1.0000 | 0.47596 | 0.74498 | 0.86197 | Biso | 1.000 | P  |
| O56  | 1.0000 | 0.37318 | 0.63982 | 0.82471 | Biso | 1.000 | O  |
| O57  | 1.0000 | 0.26101 | 0.76787 | 0.17229 | Biso | 1.000 | O  |
| O58  | 1.0000 | 0.03652 | 0.97307 | 0.17751 | Biso | 1.000 | O  |
| O59  | 1.0000 | 0.17734 | 0.53875 | 0.12137 | Biso | 1.000 | O  |
| O60  | 1.0000 | 0.12237 | 0.52274 | 0.46076 | Biso | 1.000 | O  |
| O61  | 1.0000 | 0.02574 | 0.60189 | 0.18033 | Biso | 1.000 | O  |
| O62  | 1.0000 | 0.40749 | 0.85852 | 0.29391 | Biso | 1.000 | O  |
| O63  | 1.0000 | 0.18242 | 0.59625 | 0.30655 | Biso | 1.000 | O  |
| O64  | 1.0000 | 0.31808 | 0.94628 | 0.42536 | Biso | 1.000 | O  |
| P17  | 1.0000 | 0.16267 | 0.62631 | 0.40164 | Biso | 1.000 | P  |
| O65  | 1.0000 | 0.27389 | 0.72052 | 0.44104 | Biso | 1.000 | O  |
| O66  | 1.0000 | 0.38294 | 0.59868 | 0.09770 | Biso | 1.000 | O  |
| AI17 | 1.0000 | 0.26165 | 0.51104 | 0.85916 | Biso | 1.000 | AI |
| O67  | 1.0000 | 0.06178 | 0.93507 | 0.40455 | Biso | 1.000 | O  |
| O68  | 1.0000 | 0.46634 | 0.83098 | 0.14313 | Biso | 1.000 | O  |
| O69  | 1.0000 | 0.07634 | 0.66669 | 0.39916 | Biso | 1.000 | O  |
| AI18 | 1.0000 | 0.16123 | 0.62682 | 0.19624 | Biso | 1.000 | AI |
| O70  | 1.0000 | 0.24704 | 0.27557 | 0.95607 | Biso | 1.000 | O  |

|     |        |         |         |         |      |       |   |
|-----|--------|---------|---------|---------|------|-------|---|
| O71 | 1.0000 | 0.46485 | 0.24258 | 0.98317 | Biso | 1.000 | O |
| O72 | 1.0000 | 0.23956 | 0.50637 | 0.97415 | Biso | 1.000 | O |
| H1  | 1.0000 | 0.91168 | 0.73167 | 0.56412 | Biso | 1.000 | H |
| H2  | 1.0000 | 0.67667 | 0.53055 | 0.50382 | Biso | 1.000 | H |
| C1  | 1.0000 | 0.61431 | 0.78499 | 0.32095 | Biso | 1.000 | C |
| C2  | 1.0000 | 0.56716 | 0.58545 | 0.34171 | Biso | 1.000 | C |
| H3  | 1.0000 | 0.61400 | 0.59387 | 0.28149 | Biso | 1.000 | H |
| C3  | 1.0000 | 0.51676 | 0.48350 | 0.38667 | Biso | 1.000 | C |
| C4  | 1.0000 | 0.52586 | 0.38820 | 0.34706 | Biso | 1.000 | C |
| C5  | 1.0000 | 0.45590 | 0.47120 | 0.46647 | Biso | 1.000 | C |
| C6  | 1.0000 | 0.64288 | 0.54383 | 0.56436 | Biso | 1.000 | C |
| C7  | 1.0000 | 0.44285 | 0.56157 | 0.49523 | Biso | 1.000 | C |
| C8  | 1.0000 | 0.37768 | 0.55356 | 0.57810 | Biso | 1.000 | C |
| C9  | 1.0000 | 0.49410 | 0.66149 | 0.44772 | Biso | 1.000 | C |
| H4  | 1.0000 | 0.48407 | 0.72952 | 0.47152 | Biso | 1.000 | H |
| C10 | 1.0000 | 0.55755 | 0.67630 | 0.37106 | Biso | 1.000 | C |
| H5  | 1.0000 | 0.61107 | 0.77002 | 0.24983 | Biso | 1.000 | H |
| H6  | 1.0000 | 0.70257 | 0.83285 | 0.33870 | Biso | 1.000 | H |
| H7  | 1.0000 | 0.57708 | 0.83651 | 0.33419 | Biso | 1.000 | H |
| H8  | 1.0000 | 0.44341 | 0.32005 | 0.32773 | Biso | 1.000 | H |
| H9  | 1.0000 | 0.56144 | 0.35312 | 0.39295 | Biso | 1.000 | H |
| H10 | 1.0000 | 0.57837 | 0.41550 | 0.28780 | Biso | 1.000 | H |
| H11 | 1.0000 | 0.59646 | 0.47186 | 0.60723 | Biso | 1.000 | H |
| H12 | 1.0000 | 0.41810 | 0.54522 | 0.63809 | Biso | 1.000 | H |
| H13 | 1.0000 | 0.29383 | 0.48054 | 0.57633 | Biso | 1.000 | H |
| H14 | 1.0000 | 0.36985 | 0.62783 | 0.58617 | Biso | 1.000 | H |
| C11 | 1.0000 | 0.39538 | 0.36028 | 0.51393 | Biso | 1.000 | C |
| H15 | 1.0000 | 0.31291 | 0.30839 | 0.48475 | Biso | 1.000 | H |
| H16 | 1.0000 | 0.43909 | 0.31334 | 0.50881 | Biso | 1.000 | H |
| H17 | 1.0000 | 0.38285 | 0.36964 | 0.58427 | Biso | 1.000 | H |
| C12 | 1.0000 | 0.67694 | 0.65073 | 0.59346 | Biso | 1.000 | C |
| O73 | 1.0000 | 0.89060 | 0.72033 | 0.62922 | Biso | 1.000 | O |
| H18 | 1.0000 | 0.77679 | 0.67370 | 0.61818 | Biso | 1.000 | H |
| H19 | 1.0000 | 0.70556 | 0.71617 | 0.54347 | Biso | 1.000 | H |
| H20 | 1.0000 | 0.63689 | 0.66138 | 0.65178 | Biso | 1.000 | H |
| H21 | 1.0000 | 0.91582 | 0.79418 | 0.65433 | Biso | 1.000 | H |

TS-MS1/C3 in TMB-based pathway

data\_image0

\_cell\_length\_a 13.8042  
 \_cell\_length\_b 13.8042  
 \_cell\_length\_c 15.044  
 \_cell\_angle\_alpha 90  
 \_cell\_angle\_beta 90  
 \_cell\_angle\_gamma 120

\_symmetry\_space\_group\_name\_H-M P 1  
 \_symmetry\_int\_tables\_number 1

loop\_

\_symmetry\_equiv\_pos\_as\_xyz  
 'x, y, z'

loop\_

\_atom\_site\_label  
 \_atom\_site\_occupancy  
 \_atom\_site\_fract\_x  
 \_atom\_site\_fract\_y  
 \_atom\_site\_fract\_z  
 \_atom\_site\_thermal\_displace\_type  
 \_atom\_site\_B\_iso\_or\_equiv  
 \_atom\_site\_type\_symbol

|     |        |         |         |         |      |       |    |
|-----|--------|---------|---------|---------|------|-------|----|
| P1  | 1.0000 | 0.04717 | 0.18176 | 0.53182 | Biso | 1.000 | P  |
| O1  | 1.0000 | 0.08887 | 0.30821 | 0.52517 | Biso | 1.000 | O  |
| O2  | 1.0000 | 0.29083 | 0.40324 | 0.83471 | Biso | 1.000 | O  |
| O3  | 1.0000 | 0.13235 | 0.47985 | 0.81339 | Biso | 1.000 | O  |
| Al1 | 1.0000 | 0.25661 | 0.28519 | 0.07462 | Biso | 1.000 | Al |
| O4  | 1.0000 | 0.17219 | 0.12513 | 0.28984 | Biso | 1.000 | O  |
| Al2 | 1.0000 | 0.04531 | 0.17475 | 0.73780 | Biso | 1.000 | Al |
| P2  | 1.0000 | 0.15284 | 0.07624 | 0.19462 | Biso | 1.000 | P  |
| Al3 | 1.0000 | 0.14757 | 0.06960 | 0.40032 | Biso | 1.000 | Al |
| O5  | 1.0000 | 0.07270 | 0.15433 | 0.62649 | Biso | 1.000 | O  |
| P3  | 1.0000 | 0.25975 | 0.28192 | 0.85984 | Biso | 1.000 | P  |
| O6  | 1.0000 | 0.35926 | 0.26564 | 0.83647 | Biso | 1.000 | O  |
| O7  | 1.0000 | 0.24570 | 0.04754 | 0.17078 | Biso | 1.000 | O  |
| O8  | 1.0000 | 0.48422 | 0.20881 | 0.15392 | Biso | 1.000 | O  |
| Al4 | 1.0000 | 0.05275 | 0.41184 | 0.53972 | Biso | 1.000 | Al |
| O9  | 1.0000 | 0.15786 | 0.19679 | 0.80577 | Biso | 1.000 | O  |
| P4  | 1.0000 | 0.26586 | 0.51353 | 0.08009 | Biso | 1.000 | P  |
| Al5 | 1.0000 | 0.38242 | 0.08153 | 0.20128 | Biso | 1.000 | Al |

|      |        |         |         |         |      |       |    |
|------|--------|---------|---------|---------|------|-------|----|
| O10  | 1.0000 | 0.24063 | 0.39735 | 0.11222 | Biso | 1.000 | O  |
| O11  | 1.0000 | 0.01804 | 0.28702 | 0.74326 | Biso | 1.000 | O  |
| O12  | 1.0000 | 0.40512 | 0.10151 | 0.31655 | Biso | 1.000 | O  |
| O13  | 1.0000 | 0.11236 | 0.15525 | 0.46298 | Biso | 1.000 | O  |
| O14  | 1.0000 | 0.08481 | 0.46273 | 0.65042 | Biso | 1.000 | O  |
| P5   | 1.0000 | 0.36799 | 0.06962 | 0.41427 | Biso | 1.000 | P  |
| O15  | 1.0000 | 0.28258 | 0.10413 | 0.44188 | Biso | 1.000 | O  |
| O16  | 1.0000 | 0.39554 | 0.32190 | 0.10176 | Biso | 1.000 | O  |
| P6   | 1.0000 | 0.04294 | 0.40972 | 0.74372 | Biso | 1.000 | P  |
| Al6  | 1.0000 | 0.48277 | 0.27511 | 0.87788 | Biso | 1.000 | Al |
| O17  | 1.0000 | 0.15759 | 0.16460 | 0.12896 | Biso | 1.000 | O  |
| Al7  | 1.0000 | 0.92904 | 0.61925 | 0.41040 | Biso | 1.000 | Al |
| P7   | 1.0000 | 0.71315 | 0.51539 | 0.86528 | Biso | 1.000 | P  |
| Al8  | 1.0000 | 0.58618 | 0.94238 | 0.73806 | Biso | 1.000 | Al |
| O18  | 1.0000 | 0.70529 | 0.61653 | 0.83153 | Biso | 1.000 | O  |
| O19  | 1.0000 | 0.95404 | 0.73864 | 0.16788 | Biso | 1.000 | O  |
| O20  | 1.0000 | 0.81915 | 0.83867 | 0.12544 | Biso | 1.000 | O  |
| O21  | 1.0000 | 0.56258 | 0.88901 | 0.62781 | Biso | 1.000 | O  |
| O22  | 1.0000 | 0.85794 | 0.88247 | 0.47289 | Biso | 1.000 | O  |
| O23  | 1.0000 | 0.90969 | 0.59715 | 0.29396 | Biso | 1.000 | O  |
| P8   | 1.0000 | 0.59233 | 0.94749 | 0.53563 | Biso | 1.000 | P  |
| O24  | 1.0000 | 0.68721 | 0.93727 | 0.49110 | Biso | 1.000 | O  |
| O25  | 1.0000 | 0.57197 | 0.72028 | 0.84958 | Biso | 1.000 | O  |
| O26  | 1.0000 | 0.80042 | 0.84505 | 0.78422 | Biso | 1.000 | O  |
| P9   | 1.0000 | 0.92709 | 0.61918 | 0.19323 | Biso | 1.000 | P  |
| Al9  | 1.0000 | 0.48298 | 0.74173 | 0.06885 | Biso | 1.000 | Al |
| Si1  | 1.0000 | 0.92140 | 0.83784 | 0.40820 | Biso | 1.000 | Si |
| O27  | 1.0000 | 0.90212 | 0.71977 | 0.45028 | Biso | 1.000 | O  |
| O28  | 1.0000 | 0.68560 | 0.63314 | 0.08942 | Biso | 1.000 | O  |
| O29  | 1.0000 | 0.48808 | 0.88896 | 0.47575 | Biso | 1.000 | O  |
| Al10 | 1.0000 | 0.70896 | 0.74150 | 0.85872 | Biso | 1.000 | Al |
| O30  | 1.0000 | 0.81508 | 0.94523 | 0.64320 | Biso | 1.000 | O  |
| O31  | 1.0000 | 0.81918 | 0.53173 | 0.14529 | Biso | 1.000 | O  |
| P10  | 1.0000 | 0.81643 | 0.95581 | 0.74469 | Biso | 1.000 | P  |
| Al11 | 1.0000 | 0.91879 | 0.84114 | 0.20200 | Biso | 1.000 | Al |
| Al12 | 1.0000 | 0.82304 | 0.96829 | 0.52700 | Biso | 1.000 | Al |
| O32  | 1.0000 | 0.86624 | 0.81539 | 0.30837 | Biso | 1.000 | O  |
| O33  | 1.0000 | 0.83940 | 0.48898 | 0.46129 | Biso | 1.000 | O  |
| O34  | 1.0000 | 0.48364 | 0.83724 | 0.80446 | Biso | 1.000 | O  |
| P11  | 1.0000 | 0.72247 | 0.75699 | 0.06600 | Biso | 1.000 | P  |
| O35  | 1.0000 | 0.62197 | 0.77506 | 0.08258 | Biso | 1.000 | O  |
| O36  | 1.0000 | 0.72074 | 0.97637 | 0.77595 | Biso | 1.000 | O  |
| O37  | 1.0000 | 0.81268 | 0.43083 | 0.62267 | Biso | 1.000 | O  |
| O38  | 1.0000 | 0.47319 | 0.13278 | 0.47238 | Biso | 1.000 | O  |



|      |        |         |         |         |      |       |    |
|------|--------|---------|---------|---------|------|-------|----|
| O39  | 1.0000 | 0.63032 | 0.07264 | 0.54846 | Biso | 1.000 | O  |
| P12  | 1.0000 | 0.81784 | 0.39470 | 0.52627 | Biso | 1.000 | P  |
| O40  | 1.0000 | 0.70358 | 0.29332 | 0.50021 | Biso | 1.000 | O  |
| O41  | 1.0000 | 0.59259 | 0.41433 | 0.87113 | Biso | 1.000 | O  |
| O42  | 1.0000 | 0.50689 | 0.18368 | 0.81361 | Biso | 1.000 | O  |
| AI13 | 1.0000 | 0.72082 | 0.52742 | 0.06927 | Biso | 1.000 | AI |
| O43  | 1.0000 | 0.91936 | 0.11474 | 0.51343 | Biso | 1.000 | O  |
| AI14 | 1.0000 | 0.81050 | 0.40173 | 0.73691 | Biso | 1.000 | AI |
| O44  | 1.0000 | 0.90941 | 0.36104 | 0.51789 | Biso | 1.000 | O  |
| P13  | 1.0000 | 0.58278 | 0.17438 | 0.74331 | Biso | 1.000 | P  |
| O45  | 1.0000 | 0.56495 | 0.05576 | 0.74953 | Biso | 1.000 | O  |
| AI15 | 1.0000 | 0.58743 | 0.17294 | 0.54212 | Biso | 1.000 | AI |
| O46  | 1.0000 | 0.92824 | 0.05314 | 0.77890 | Biso | 1.000 | O  |
| O47  | 1.0000 | 0.78510 | 0.49293 | 0.80009 | Biso | 1.000 | O  |
| P14  | 1.0000 | 0.48690 | 0.29041 | 0.08269 | Biso | 1.000 | P  |
| O48  | 1.0000 | 0.60148 | 0.39711 | 0.08701 | Biso | 1.000 | O  |
| O49  | 1.0000 | 0.70741 | 0.26102 | 0.76035 | Biso | 1.000 | O  |
| O50  | 1.0000 | 0.93685 | 0.41239 | 0.77034 | Biso | 1.000 | O  |
| O51  | 1.0000 | 0.54850 | 0.19432 | 0.64945 | Biso | 1.000 | O  |
| O52  | 1.0000 | 0.45561 | 0.76195 | 0.95842 | Biso | 1.000 | O  |
| O53  | 1.0000 | 0.76858 | 0.53937 | 0.95856 | Biso | 1.000 | O  |
| O54  | 1.0000 | 0.75954 | 0.78241 | 0.96773 | Biso | 1.000 | O  |
| P15  | 1.0000 | 0.38428 | 0.85843 | 0.19685 | Biso | 1.000 | P  |
| O55  | 1.0000 | 0.40608 | 0.97354 | 0.16458 | Biso | 1.000 | O  |
| AI16 | 1.0000 | 0.37289 | 0.85459 | 0.40713 | Biso | 1.000 | AI |
| P16  | 1.0000 | 0.47047 | 0.73820 | 0.86025 | Biso | 1.000 | P  |
| O56  | 1.0000 | 0.36553 | 0.63277 | 0.82602 | Biso | 1.000 | O  |
| O57  | 1.0000 | 0.25803 | 0.77143 | 0.18669 | Biso | 1.000 | O  |
| O58  | 1.0000 | 0.03810 | 0.97188 | 0.18383 | Biso | 1.000 | O  |
| O59  | 1.0000 | 0.19190 | 0.54611 | 0.13367 | Biso | 1.000 | O  |
| O60  | 1.0000 | 0.14009 | 0.51720 | 0.46485 | Biso | 1.000 | O  |
| O61  | 1.0000 | 0.02470 | 0.60326 | 0.16052 | Biso | 1.000 | O  |
| O62  | 1.0000 | 0.41920 | 0.86479 | 0.29595 | Biso | 1.000 | O  |
| O63  | 1.0000 | 0.14882 | 0.58757 | 0.31029 | Biso | 1.000 | O  |
| O64  | 1.0000 | 0.31575 | 0.94116 | 0.42662 | Biso | 1.000 | O  |
| P17  | 1.0000 | 0.15576 | 0.61844 | 0.41010 | Biso | 1.000 | P  |
| O65  | 1.0000 | 0.27532 | 0.71503 | 0.43186 | Biso | 1.000 | O  |
| O66  | 1.0000 | 0.39212 | 0.59875 | 0.09698 | Biso | 1.000 | O  |
| AI17 | 1.0000 | 0.25596 | 0.50565 | 0.86521 | Biso | 1.000 | AI |
| O67  | 1.0000 | 0.05587 | 0.92817 | 0.40187 | Biso | 1.000 | O  |
| O68  | 1.0000 | 0.45791 | 0.82617 | 0.14164 | Biso | 1.000 | O  |
| O69  | 1.0000 | 0.06978 | 0.65385 | 0.43464 | Biso | 1.000 | O  |
| AI18 | 1.0000 | 0.15495 | 0.62808 | 0.19791 | Biso | 1.000 | AI |
| O70  | 1.0000 | 0.23098 | 0.26194 | 0.95981 | Biso | 1.000 | O  |

|     |        |         |         |         |      |       |   |
|-----|--------|---------|---------|---------|------|-------|---|
| O71 | 1.0000 | 0.46633 | 0.23303 | 0.99037 | Biso | 1.000 | O |
| O72 | 1.0000 | 0.23817 | 0.51098 | 0.98045 | Biso | 1.000 | O |
| H1  | 1.0000 | 0.85697 | 0.70491 | 0.57544 | Biso | 1.000 | H |
| C1  | 1.0000 | 0.55614 | 0.45904 | 0.64574 | Biso | 1.000 | C |
| H2  | 1.0000 | 0.55728 | 0.39437 | 0.68642 | Biso | 1.000 | H |
| H3  | 1.0000 | 0.64219 | 0.52217 | 0.63041 | Biso | 1.000 | H |
| H4  | 1.0000 | 0.51924 | 0.49781 | 0.68620 | Biso | 1.000 | H |
| C2  | 1.0000 | 0.61127 | 0.76680 | 0.30877 | Biso | 1.000 | C |
| C3  | 1.0000 | 0.58394 | 0.57474 | 0.34687 | Biso | 1.000 | C |
| H5  | 1.0000 | 0.62727 | 0.57673 | 0.28622 | Biso | 1.000 | H |
| C4  | 1.0000 | 0.55187 | 0.48822 | 0.40615 | Biso | 1.000 | C |
| C5  | 1.0000 | 0.56835 | 0.39309 | 0.37782 | Biso | 1.000 | C |
| C6  | 1.0000 | 0.50171 | 0.48857 | 0.49121 | Biso | 1.000 | C |
| C7  | 1.0000 | 0.48759 | 0.40308 | 0.56141 | Biso | 1.000 | C |
| C8  | 1.0000 | 0.47118 | 0.56910 | 0.50630 | Biso | 1.000 | C |
| C9  | 1.0000 | 0.41909 | 0.58451 | 0.58963 | Biso | 1.000 | C |
| C10 | 1.0000 | 0.49412 | 0.65030 | 0.43896 | Biso | 1.000 | C |
| H6  | 1.0000 | 0.47880 | 0.71770 | 0.45432 | Biso | 1.000 | H |
| C11 | 1.0000 | 0.55627 | 0.66001 | 0.36074 | Biso | 1.000 | C |
| H7  | 1.0000 | 0.62280 | 0.75151 | 0.24002 | Biso | 1.000 | H |
| H8  | 1.0000 | 0.69393 | 0.81990 | 0.33718 | Biso | 1.000 | H |
| H9  | 1.0000 | 0.56486 | 0.81113 | 0.31183 | Biso | 1.000 | H |
| H10 | 1.0000 | 0.48827 | 0.31525 | 0.37741 | Biso | 1.000 | H |
| H11 | 1.0000 | 0.62436 | 0.38141 | 0.42129 | Biso | 1.000 | H |
| H12 | 1.0000 | 0.60262 | 0.40680 | 0.31076 | Biso | 1.000 | H |
| H13 | 1.0000 | 0.52304 | 0.35499 | 0.53335 | Biso | 1.000 | H |
| H14 | 1.0000 | 0.48418 | 0.64479 | 0.63407 | Biso | 1.000 | H |
| H15 | 1.0000 | 0.36987 | 0.50807 | 0.62693 | Biso | 1.000 | H |
| H16 | 1.0000 | 0.36518 | 0.61868 | 0.57275 | Biso | 1.000 | H |
| C12 | 1.0000 | 0.39882 | 0.58338 | 0.33466 | Biso | 1.000 | C |
| H17 | 1.0000 | 0.42116 | 0.59765 | 0.26487 | Biso | 1.000 | H |
| H18 | 1.0000 | 0.36123 | 0.49594 | 0.35251 | Biso | 1.000 | H |
| H19 | 1.0000 | 0.34979 | 0.62145 | 0.35272 | Biso | 1.000 | H |
| C13 | 1.0000 | 0.36488 | 0.31739 | 0.58325 | Biso | 1.000 | C |
| O73 | 1.0000 | 0.83221 | 0.68196 | 0.63650 | Biso | 1.000 | O |
| H20 | 1.0000 | 0.36150 | 0.24747 | 0.61993 | Biso | 1.000 | H |
| H21 | 1.0000 | 0.32519 | 0.35238 | 0.62465 | Biso | 1.000 | H |
| H22 | 1.0000 | 0.31548 | 0.28439 | 0.52312 | Biso | 1.000 | H |
| H23 | 1.0000 | 0.84363 | 0.74935 | 0.66572 | Biso | 1.000 | H |

TS-MS2/C3 in TMB-based pathway

data\_image0

\_cell\_length\_a 13.8042  
 \_cell\_length\_b 13.8042  
 \_cell\_length\_c 15.044  
 \_cell\_angle\_alpha 90  
 \_cell\_angle\_beta 90  
 \_cell\_angle\_gamma 120

\_symmetry\_space\_group\_name\_H-M P 1

\_symmetry\_int\_tables\_number 1

loop\_

\_symmetry\_equiv\_pos\_as\_xyz  
 'x, y, z'

loop\_

\_atom\_site\_label  
 \_atom\_site\_occupancy  
 \_atom\_site\_fract\_x  
 \_atom\_site\_fract\_y  
 \_atom\_site\_fract\_z  
 \_atom\_site\_thermal\_displace\_type  
 \_atom\_site\_B\_iso\_or\_equiv  
 \_atom\_site\_type\_symbol

|     |        |         |         |         |      |       |    |
|-----|--------|---------|---------|---------|------|-------|----|
| P1  | 1.0000 | 0.04078 | 0.18210 | 0.52683 | Biso | 1.000 | P  |
| O1  | 1.0000 | 0.08235 | 0.30854 | 0.51469 | Biso | 1.000 | O  |
| O2  | 1.0000 | 0.29369 | 0.40205 | 0.83311 | Biso | 1.000 | O  |
| O3  | 1.0000 | 0.12739 | 0.47284 | 0.81727 | Biso | 1.000 | O  |
| Al1 | 1.0000 | 0.24474 | 0.28027 | 0.07018 | Biso | 1.000 | Al |
| O4  | 1.0000 | 0.16472 | 0.12077 | 0.29002 | Biso | 1.000 | O  |
| Al2 | 1.0000 | 0.03672 | 0.17529 | 0.73624 | Biso | 1.000 | Al |
| P2  | 1.0000 | 0.14278 | 0.07364 | 0.19416 | Biso | 1.000 | P  |
| Al3 | 1.0000 | 0.14040 | 0.06501 | 0.40042 | Biso | 1.000 | Al |
| O5  | 1.0000 | 0.06328 | 0.15955 | 0.62381 | Biso | 1.000 | O  |
| P3  | 1.0000 | 0.25023 | 0.27804 | 0.85995 | Biso | 1.000 | P  |
| O6  | 1.0000 | 0.34530 | 0.25140 | 0.84991 | Biso | 1.000 | O  |
| O7  | 1.0000 | 0.23371 | 0.04341 | 0.16758 | Biso | 1.000 | O  |
| O8  | 1.0000 | 0.47205 | 0.20287 | 0.15173 | Biso | 1.000 | O  |
| Al4 | 1.0000 | 0.04686 | 0.41054 | 0.54199 | Biso | 1.000 | Al |
| O9  | 1.0000 | 0.15496 | 0.19940 | 0.79736 | Biso | 1.000 | O  |
| P4  | 1.0000 | 0.26038 | 0.51057 | 0.08067 | Biso | 1.000 | P  |
| Al5 | 1.0000 | 0.36972 | 0.07589 | 0.19861 | Biso | 1.000 | Al |

|      |        |         |         |         |      |       |    |
|------|--------|---------|---------|---------|------|-------|----|
| O10  | 1.0000 | 0.24161 | 0.39704 | 0.11453 | Biso | 1.000 | O  |
| O11  | 1.0000 | 0.00331 | 0.28342 | 0.74506 | Biso | 1.000 | O  |
| O12  | 1.0000 | 0.39292 | 0.09452 | 0.31378 | Biso | 1.000 | O  |
| O13  | 1.0000 | 0.11014 | 0.15463 | 0.46305 | Biso | 1.000 | O  |
| O14  | 1.0000 | 0.09400 | 0.46034 | 0.65155 | Biso | 1.000 | O  |
| P5   | 1.0000 | 0.36316 | 0.06875 | 0.41320 | Biso | 1.000 | P  |
| O15  | 1.0000 | 0.27520 | 0.09930 | 0.44172 | Biso | 1.000 | O  |
| O16  | 1.0000 | 0.38345 | 0.30870 | 0.08297 | Biso | 1.000 | O  |
| P6   | 1.0000 | 0.04082 | 0.40987 | 0.74369 | Biso | 1.000 | P  |
| Al6  | 1.0000 | 0.47855 | 0.27263 | 0.87535 | Biso | 1.000 | Al |
| O17  | 1.0000 | 0.14814 | 0.16373 | 0.13015 | Biso | 1.000 | O  |
| Al7  | 1.0000 | 0.92235 | 0.61643 | 0.40492 | Biso | 1.000 | Al |
| P7   | 1.0000 | 0.70114 | 0.51300 | 0.86039 | Biso | 1.000 | P  |
| Al8  | 1.0000 | 0.58100 | 0.94175 | 0.73759 | Biso | 1.000 | Al |
| O18  | 1.0000 | 0.69862 | 0.61731 | 0.82732 | Biso | 1.000 | O  |
| O19  | 1.0000 | 0.94566 | 0.73721 | 0.17111 | Biso | 1.000 | O  |
| O20  | 1.0000 | 0.80854 | 0.83528 | 0.12725 | Biso | 1.000 | O  |
| O21  | 1.0000 | 0.55768 | 0.88859 | 0.62723 | Biso | 1.000 | O  |
| O22  | 1.0000 | 0.85130 | 0.87577 | 0.47924 | Biso | 1.000 | O  |
| O23  | 1.0000 | 0.88467 | 0.58541 | 0.29112 | Biso | 1.000 | O  |
| P8   | 1.0000 | 0.58496 | 0.94177 | 0.53295 | Biso | 1.000 | P  |
| O24  | 1.0000 | 0.68197 | 0.93348 | 0.49063 | Biso | 1.000 | O  |
| O25  | 1.0000 | 0.56817 | 0.72251 | 0.85516 | Biso | 1.000 | O  |
| O26  | 1.0000 | 0.79417 | 0.84484 | 0.78257 | Biso | 1.000 | O  |
| P9   | 1.0000 | 0.91716 | 0.61624 | 0.19261 | Biso | 1.000 | P  |
| Al9  | 1.0000 | 0.47592 | 0.74133 | 0.06894 | Biso | 1.000 | Al |
| Si1  | 1.0000 | 0.91252 | 0.83332 | 0.41018 | Biso | 1.000 | Si |
| O27  | 1.0000 | 0.89284 | 0.71336 | 0.44891 | Biso | 1.000 | O  |
| O28  | 1.0000 | 0.67763 | 0.63092 | 0.08896 | Biso | 1.000 | O  |
| O29  | 1.0000 | 0.48125 | 0.87615 | 0.47357 | Biso | 1.000 | O  |
| Al10 | 1.0000 | 0.70502 | 0.74245 | 0.85895 | Biso | 1.000 | Al |
| O30  | 1.0000 | 0.81188 | 0.95131 | 0.64331 | Biso | 1.000 | O  |
| O31  | 1.0000 | 0.81714 | 0.53200 | 0.13550 | Biso | 1.000 | O  |
| P10  | 1.0000 | 0.81133 | 0.95688 | 0.74493 | Biso | 1.000 | P  |
| Al11 | 1.0000 | 0.90899 | 0.83931 | 0.20391 | Biso | 1.000 | Al |
| Al12 | 1.0000 | 0.81801 | 0.96661 | 0.52648 | Biso | 1.000 | Al |
| O32  | 1.0000 | 0.85745 | 0.81587 | 0.31061 | Biso | 1.000 | O  |
| O33  | 1.0000 | 0.85303 | 0.48643 | 0.46081 | Biso | 1.000 | O  |
| O34  | 1.0000 | 0.47939 | 0.83777 | 0.80574 | Biso | 1.000 | O  |
| P11  | 1.0000 | 0.71634 | 0.75463 | 0.06395 | Biso | 1.000 | P  |
| O35  | 1.0000 | 0.61511 | 0.77278 | 0.07292 | Biso | 1.000 | O  |
| O36  | 1.0000 | 0.71517 | 0.97613 | 0.77689 | Biso | 1.000 | O  |
| O37  | 1.0000 | 0.79867 | 0.43083 | 0.62100 | Biso | 1.000 | O  |
| O38  | 1.0000 | 0.47109 | 0.14126 | 0.46662 | Biso | 1.000 | O  |

|      |        |         |         |         |      |       |    |
|------|--------|---------|---------|---------|------|-------|----|
| O39  | 1.0000 | 0.61840 | 0.06636 | 0.53983 | Biso | 1.000 | O  |
| P12  | 1.0000 | 0.81463 | 0.39154 | 0.52870 | Biso | 1.000 | P  |
| O40  | 1.0000 | 0.70235 | 0.29287 | 0.49547 | Biso | 1.000 | O  |
| O41  | 1.0000 | 0.57882 | 0.41426 | 0.85842 | Biso | 1.000 | O  |
| O42  | 1.0000 | 0.50210 | 0.18492 | 0.80609 | Biso | 1.000 | O  |
| AI13 | 1.0000 | 0.70980 | 0.52351 | 0.06817 | Biso | 1.000 | AI |
| O43  | 1.0000 | 0.91390 | 0.11215 | 0.50582 | Biso | 1.000 | O  |
| AI14 | 1.0000 | 0.80688 | 0.40459 | 0.73492 | Biso | 1.000 | AI |
| O44  | 1.0000 | 0.90046 | 0.35022 | 0.53582 | Biso | 1.000 | O  |
| P13  | 1.0000 | 0.58149 | 0.17622 | 0.73899 | Biso | 1.000 | P  |
| O45  | 1.0000 | 0.56327 | 0.05751 | 0.74590 | Biso | 1.000 | O  |
| AI15 | 1.0000 | 0.58401 | 0.17266 | 0.53609 | Biso | 1.000 | AI |
| O46  | 1.0000 | 0.92339 | 0.05285 | 0.78032 | Biso | 1.000 | O  |
| O47  | 1.0000 | 0.77771 | 0.49234 | 0.79902 | Biso | 1.000 | O  |
| P14  | 1.0000 | 0.48235 | 0.28590 | 0.07891 | Biso | 1.000 | P  |
| O48  | 1.0000 | 0.59081 | 0.39658 | 0.09628 | Biso | 1.000 | O  |
| O49  | 1.0000 | 0.70562 | 0.26271 | 0.75906 | Biso | 1.000 | O  |
| O50  | 1.0000 | 0.93936 | 0.42459 | 0.76208 | Biso | 1.000 | O  |
| O51  | 1.0000 | 0.55010 | 0.19644 | 0.64428 | Biso | 1.000 | O  |
| O52  | 1.0000 | 0.44183 | 0.75639 | 0.95862 | Biso | 1.000 | O  |
| O53  | 1.0000 | 0.74861 | 0.52948 | 0.95593 | Biso | 1.000 | O  |
| O54  | 1.0000 | 0.76098 | 0.77987 | 0.96723 | Biso | 1.000 | O  |
| P15  | 1.0000 | 0.37815 | 0.85587 | 0.19343 | Biso | 1.000 | P  |
| O55  | 1.0000 | 0.39108 | 0.96741 | 0.16079 | Biso | 1.000 | O  |
| AI16 | 1.0000 | 0.36779 | 0.85091 | 0.40582 | Biso | 1.000 | AI |
| P16  | 1.0000 | 0.46436 | 0.73746 | 0.86111 | Biso | 1.000 | P  |
| O56  | 1.0000 | 0.36242 | 0.63177 | 0.82253 | Biso | 1.000 | O  |
| O57  | 1.0000 | 0.25542 | 0.76158 | 0.17968 | Biso | 1.000 | O  |
| O58  | 1.0000 | 0.02692 | 0.97073 | 0.18404 | Biso | 1.000 | O  |
| O59  | 1.0000 | 0.17326 | 0.53334 | 0.12517 | Biso | 1.000 | O  |
| O60  | 1.0000 | 0.11726 | 0.51989 | 0.46627 | Biso | 1.000 | O  |
| O61  | 1.0000 | 0.01885 | 0.60353 | 0.16770 | Biso | 1.000 | O  |
| O62  | 1.0000 | 0.40963 | 0.86352 | 0.29340 | Biso | 1.000 | O  |
| O63  | 1.0000 | 0.15264 | 0.58034 | 0.30697 | Biso | 1.000 | O  |
| O64  | 1.0000 | 0.31794 | 0.94233 | 0.43132 | Biso | 1.000 | O  |
| P17  | 1.0000 | 0.14939 | 0.61929 | 0.40337 | Biso | 1.000 | P  |
| O65  | 1.0000 | 0.26886 | 0.71115 | 0.43052 | Biso | 1.000 | O  |
| O66  | 1.0000 | 0.38158 | 0.60268 | 0.10548 | Biso | 1.000 | O  |
| AI17 | 1.0000 | 0.25604 | 0.50314 | 0.86355 | Biso | 1.000 | AI |
| O67  | 1.0000 | 0.04716 | 0.92410 | 0.40372 | Biso | 1.000 | O  |
| O68  | 1.0000 | 0.46074 | 0.83409 | 0.14000 | Biso | 1.000 | O  |
| O69  | 1.0000 | 0.06951 | 0.66625 | 0.41039 | Biso | 1.000 | O  |
| AI18 | 1.0000 | 0.14914 | 0.62061 | 0.19519 | Biso | 1.000 | AI |
| O70  | 1.0000 | 0.20591 | 0.25897 | 0.95674 | Biso | 1.000 | O  |

|     |        |         |         |         |      |       |   |
|-----|--------|---------|---------|---------|------|-------|---|
| O71 | 1.0000 | 0.48505 | 0.23631 | 0.98696 | Biso | 1.000 | O |
| O72 | 1.0000 | 0.24372 | 0.50738 | 0.97920 | Biso | 1.000 | O |
| H1  | 1.0000 | 0.88034 | 0.71268 | 0.58591 | Biso | 1.000 | H |
| C1  | 1.0000 | 0.56621 | 0.46681 | 0.62864 | Biso | 1.000 | C |
| H2  | 1.0000 | 0.57019 | 0.40767 | 0.67425 | Biso | 1.000 | H |
| H3  | 1.0000 | 0.65121 | 0.52618 | 0.60734 | Biso | 1.000 | H |
| H4  | 1.0000 | 0.53390 | 0.51221 | 0.66615 | Biso | 1.000 | H |
| C2  | 1.0000 | 0.59793 | 0.76497 | 0.29807 | Biso | 1.000 | C |
| C3  | 1.0000 | 0.59064 | 0.58370 | 0.34106 | Biso | 1.000 | C |
| H5  | 1.0000 | 0.64647 | 0.59430 | 0.28663 | Biso | 1.000 | H |
| C4  | 1.0000 | 0.55832 | 0.49120 | 0.39891 | Biso | 1.000 | C |
| C5  | 1.0000 | 0.59158 | 0.40745 | 0.37002 | Biso | 1.000 | C |
| C6  | 1.0000 | 0.49807 | 0.48045 | 0.47693 | Biso | 1.000 | C |
| C7  | 1.0000 | 0.48911 | 0.40078 | 0.55030 | Biso | 1.000 | C |
| C8  | 1.0000 | 0.44971 | 0.55187 | 0.48572 | Biso | 1.000 | C |
| C9  | 1.0000 | 0.39730 | 0.56600 | 0.56979 | Biso | 1.000 | C |
| C10 | 1.0000 | 0.47792 | 0.63790 | 0.42049 | Biso | 1.000 | C |
| H6  | 1.0000 | 0.44889 | 0.69589 | 0.43316 | Biso | 1.000 | H |
| C11 | 1.0000 | 0.55618 | 0.66071 | 0.35190 | Biso | 1.000 | C |
| H7  | 1.0000 | 0.64425 | 0.76351 | 0.24073 | Biso | 1.000 | H |
| H8  | 1.0000 | 0.65432 | 0.83757 | 0.33807 | Biso | 1.000 | H |
| H9  | 1.0000 | 0.52963 | 0.77727 | 0.27690 | Biso | 1.000 | H |
| H10 | 1.0000 | 0.51698 | 0.32706 | 0.35585 | Biso | 1.000 | H |
| H11 | 1.0000 | 0.63936 | 0.39234 | 0.41952 | Biso | 1.000 | H |
| H12 | 1.0000 | 0.64141 | 0.43505 | 0.30948 | Biso | 1.000 | H |
| H13 | 1.0000 | 0.52282 | 0.35138 | 0.52199 | Biso | 1.000 | H |
| H14 | 1.0000 | 0.46425 | 0.61763 | 0.61636 | Biso | 1.000 | H |
| H15 | 1.0000 | 0.34049 | 0.48775 | 0.60240 | Biso | 1.000 | H |
| H16 | 1.0000 | 0.35241 | 0.61050 | 0.55556 | Biso | 1.000 | H |
| C12 | 1.0000 | 0.33755 | 0.49821 | 0.39456 | Biso | 1.000 | C |
| H17 | 1.0000 | 0.36437 | 0.45906 | 0.34574 | Biso | 1.000 | H |
| H18 | 1.0000 | 0.27656 | 0.43916 | 0.44118 | Biso | 1.000 | H |
| H19 | 1.0000 | 0.30627 | 0.54900 | 0.36565 | Biso | 1.000 | H |
| C13 | 1.0000 | 0.37072 | 0.31570 | 0.58338 | Biso | 1.000 | C |
| O73 | 1.0000 | 0.87229 | 0.69317 | 0.64877 | Biso | 1.000 | O |
| H20 | 1.0000 | 0.37349 | 0.24610 | 0.61527 | Biso | 1.000 | H |
| H21 | 1.0000 | 0.33953 | 0.35094 | 0.63297 | Biso | 1.000 | H |
| H22 | 1.0000 | 0.31078 | 0.28115 | 0.52923 | Biso | 1.000 | H |
| H23 | 1.0000 | 0.86645 | 0.75269 | 0.67778 | Biso | 1.000 | H |

TS-MS3/C3 in TMB-based pathway

data\_image0

\_cell\_length\_a 13.8042  
 \_cell\_length\_b 13.8042  
 \_cell\_length\_c 15.044  
 \_cell\_angle\_alpha 90  
 \_cell\_angle\_beta 90  
 \_cell\_angle\_gamma 120

\_symmetry\_space\_group\_name\_H-M P 1

\_symmetry\_int\_tables\_number 1

loop\_

\_symmetry\_equiv\_pos\_as\_xyz  
 'x, y, z'

loop\_

\_atom\_site\_label  
 \_atom\_site\_occupancy  
 \_atom\_site\_fract\_x  
 \_atom\_site\_fract\_y  
 \_atom\_site\_fract\_z  
 \_atom\_site\_thermal\_displace\_type  
 \_atom\_site\_B\_iso\_or\_equiv  
 \_atom\_site\_type\_symbol

|     |        |         |         |         |      |       |    |
|-----|--------|---------|---------|---------|------|-------|----|
| P1  | 1.0000 | 0.04575 | 0.18830 | 0.52665 | Biso | 1.000 | P  |
| O1  | 1.0000 | 0.08296 | 0.31398 | 0.52026 | Biso | 1.000 | O  |
| O2  | 1.0000 | 0.29872 | 0.40712 | 0.83125 | Biso | 1.000 | O  |
| O3  | 1.0000 | 0.13705 | 0.48218 | 0.81025 | Biso | 1.000 | O  |
| Al1 | 1.0000 | 0.25049 | 0.28673 | 0.06897 | Biso | 1.000 | Al |
| O4  | 1.0000 | 0.16873 | 0.12825 | 0.28705 | Biso | 1.000 | O  |
| Al2 | 1.0000 | 0.04283 | 0.18168 | 0.73294 | Biso | 1.000 | Al |
| P2  | 1.0000 | 0.14922 | 0.07806 | 0.19227 | Biso | 1.000 | P  |
| Al3 | 1.0000 | 0.14683 | 0.07743 | 0.39882 | Biso | 1.000 | Al |
| O5  | 1.0000 | 0.07116 | 0.16214 | 0.62167 | Biso | 1.000 | O  |
| P3  | 1.0000 | 0.25435 | 0.28312 | 0.85878 | Biso | 1.000 | P  |
| O6  | 1.0000 | 0.34804 | 0.25438 | 0.84864 | Biso | 1.000 | O  |
| O7  | 1.0000 | 0.24023 | 0.04654 | 0.16991 | Biso | 1.000 | O  |
| O8  | 1.0000 | 0.47548 | 0.20894 | 0.14910 | Biso | 1.000 | O  |
| Al4 | 1.0000 | 0.04623 | 0.41662 | 0.53851 | Biso | 1.000 | Al |
| O9  | 1.0000 | 0.15812 | 0.20430 | 0.79714 | Biso | 1.000 | O  |
| P4  | 1.0000 | 0.26345 | 0.51492 | 0.07874 | Biso | 1.000 | P  |
| Al5 | 1.0000 | 0.37774 | 0.08256 | 0.19903 | Biso | 1.000 | Al |

|      |        |         |         |         |      |       |    |
|------|--------|---------|---------|---------|------|-------|----|
| O10  | 1.0000 | 0.24221 | 0.40068 | 0.11333 | Biso | 1.000 | O  |
| O11  | 1.0000 | 0.01321 | 0.29249 | 0.73830 | Biso | 1.000 | O  |
| O12  | 1.0000 | 0.40396 | 0.10700 | 0.31384 | Biso | 1.000 | O  |
| O13  | 1.0000 | 0.11809 | 0.16977 | 0.45903 | Biso | 1.000 | O  |
| O14  | 1.0000 | 0.08499 | 0.47053 | 0.64802 | Biso | 1.000 | O  |
| P5   | 1.0000 | 0.36799 | 0.07875 | 0.41218 | Biso | 1.000 | P  |
| O15  | 1.0000 | 0.28346 | 0.11526 | 0.43855 | Biso | 1.000 | O  |
| O16  | 1.0000 | 0.39071 | 0.31969 | 0.08267 | Biso | 1.000 | O  |
| P6   | 1.0000 | 0.04428 | 0.41714 | 0.74155 | Biso | 1.000 | P  |
| AI6  | 1.0000 | 0.48365 | 0.28252 | 0.87360 | Biso | 1.000 | AI |
| O17  | 1.0000 | 0.15592 | 0.16633 | 0.12572 | Biso | 1.000 | O  |
| AI7  | 1.0000 | 0.92675 | 0.62301 | 0.40152 | Biso | 1.000 | AI |
| P7   | 1.0000 | 0.70271 | 0.51835 | 0.85629 | Biso | 1.000 | P  |
| AI8  | 1.0000 | 0.58346 | 0.94812 | 0.73577 | Biso | 1.000 | AI |
| O18  | 1.0000 | 0.70962 | 0.62779 | 0.82461 | Biso | 1.000 | O  |
| O19  | 1.0000 | 0.95522 | 0.74146 | 0.16800 | Biso | 1.000 | O  |
| O20  | 1.0000 | 0.81444 | 0.84006 | 0.12850 | Biso | 1.000 | O  |
| O21  | 1.0000 | 0.55943 | 0.89712 | 0.62477 | Biso | 1.000 | O  |
| O22  | 1.0000 | 0.84782 | 0.87665 | 0.47390 | Biso | 1.000 | O  |
| O23  | 1.0000 | 0.87873 | 0.59028 | 0.28929 | Biso | 1.000 | O  |
| P8   | 1.0000 | 0.59136 | 0.95698 | 0.53293 | Biso | 1.000 | P  |
| O24  | 1.0000 | 0.68650 | 0.94631 | 0.48978 | Biso | 1.000 | O  |
| O25  | 1.0000 | 0.57405 | 0.72844 | 0.85528 | Biso | 1.000 | O  |
| O26  | 1.0000 | 0.79914 | 0.85424 | 0.78477 | Biso | 1.000 | O  |
| P9   | 1.0000 | 0.92189 | 0.61960 | 0.19241 | Biso | 1.000 | P  |
| AI9  | 1.0000 | 0.48006 | 0.74522 | 0.07001 | Biso | 1.000 | AI |
| Si1  | 1.0000 | 0.92000 | 0.84102 | 0.41032 | Biso | 1.000 | Si |
| O27  | 1.0000 | 0.90775 | 0.72473 | 0.45037 | Biso | 1.000 | O  |
| O28  | 1.0000 | 0.68466 | 0.63594 | 0.09054 | Biso | 1.000 | O  |
| O29  | 1.0000 | 0.48849 | 0.90156 | 0.47159 | Biso | 1.000 | O  |
| AI10 | 1.0000 | 0.71116 | 0.74988 | 0.85968 | Biso | 1.000 | AI |
| O30  | 1.0000 | 0.81439 | 0.95114 | 0.64125 | Biso | 1.000 | O  |
| O31  | 1.0000 | 0.82773 | 0.53756 | 0.12942 | Biso | 1.000 | O  |
| P10  | 1.0000 | 0.81489 | 0.96343 | 0.74249 | Biso | 1.000 | P  |
| AI11 | 1.0000 | 0.91733 | 0.84266 | 0.20176 | Biso | 1.000 | AI |
| AI12 | 1.0000 | 0.82000 | 0.97000 | 0.52456 | Biso | 1.000 | AI |
| O32  | 1.0000 | 0.86892 | 0.81898 | 0.30916 | Biso | 1.000 | O  |
| O33  | 1.0000 | 0.85278 | 0.49836 | 0.46307 | Biso | 1.000 | O  |
| O34  | 1.0000 | 0.48581 | 0.84447 | 0.80650 | Biso | 1.000 | O  |
| P11  | 1.0000 | 0.72112 | 0.75916 | 0.06613 | Biso | 1.000 | P  |
| O35  | 1.0000 | 0.61898 | 0.77555 | 0.07700 | Biso | 1.000 | O  |
| O36  | 1.0000 | 0.71931 | 0.98485 | 0.77205 | Biso | 1.000 | O  |
| O37  | 1.0000 | 0.80858 | 0.43282 | 0.62225 | Biso | 1.000 | O  |
| O38  | 1.0000 | 0.47333 | 0.14521 | 0.46969 | Biso | 1.000 | O  |



|      |        |         |         |         |      |       |    |
|------|--------|---------|---------|---------|------|-------|----|
| O39  | 1.0000 | 0.63062 | 0.08267 | 0.54584 | Biso | 1.000 | O  |
| P12  | 1.0000 | 0.81664 | 0.39905 | 0.52579 | Biso | 1.000 | P  |
| O40  | 1.0000 | 0.70056 | 0.30555 | 0.49377 | Biso | 1.000 | O  |
| O41  | 1.0000 | 0.57822 | 0.42436 | 0.84891 | Biso | 1.000 | O  |
| O42  | 1.0000 | 0.50926 | 0.19264 | 0.80917 | Biso | 1.000 | O  |
| AI13 | 1.0000 | 0.71613 | 0.52868 | 0.06731 | Biso | 1.000 | AI |
| O43  | 1.0000 | 0.91933 | 0.11522 | 0.50575 | Biso | 1.000 | O  |
| AI14 | 1.0000 | 0.81162 | 0.40646 | 0.73656 | Biso | 1.000 | AI |
| O44  | 1.0000 | 0.90070 | 0.35521 | 0.52185 | Biso | 1.000 | O  |
| P13  | 1.0000 | 0.58529 | 0.18221 | 0.73988 | Biso | 1.000 | P  |
| O45  | 1.0000 | 0.56126 | 0.06128 | 0.74375 | Biso | 1.000 | O  |
| AI15 | 1.0000 | 0.58826 | 0.18312 | 0.53814 | Biso | 1.000 | AI |
| O46  | 1.0000 | 0.92676 | 0.06138 | 0.77596 | Biso | 1.000 | O  |
| O47  | 1.0000 | 0.77803 | 0.49420 | 0.79632 | Biso | 1.000 | O  |
| P14  | 1.0000 | 0.48923 | 0.29621 | 0.07923 | Biso | 1.000 | P  |
| O48  | 1.0000 | 0.59740 | 0.40512 | 0.10163 | Biso | 1.000 | O  |
| O49  | 1.0000 | 0.71077 | 0.26416 | 0.75955 | Biso | 1.000 | O  |
| O50  | 1.0000 | 0.94159 | 0.42529 | 0.77053 | Biso | 1.000 | O  |
| O51  | 1.0000 | 0.55517 | 0.20817 | 0.64643 | Biso | 1.000 | O  |
| O52  | 1.0000 | 0.44866 | 0.76260 | 0.95932 | Biso | 1.000 | O  |
| O53  | 1.0000 | 0.74423 | 0.52830 | 0.95325 | Biso | 1.000 | O  |
| O54  | 1.0000 | 0.76385 | 0.78463 | 0.96890 | Biso | 1.000 | O  |
| P15  | 1.0000 | 0.38182 | 0.86013 | 0.19396 | Biso | 1.000 | P  |
| O55  | 1.0000 | 0.40140 | 0.97494 | 0.16283 | Biso | 1.000 | O  |
| AI16 | 1.0000 | 0.36838 | 0.85991 | 0.40729 | Biso | 1.000 | AI |
| P16  | 1.0000 | 0.47067 | 0.74395 | 0.86157 | Biso | 1.000 | P  |
| O56  | 1.0000 | 0.36908 | 0.63844 | 0.82264 | Biso | 1.000 | O  |
| O57  | 1.0000 | 0.25864 | 0.76971 | 0.17478 | Biso | 1.000 | O  |
| O58  | 1.0000 | 0.03389 | 0.97467 | 0.18171 | Biso | 1.000 | O  |
| O59  | 1.0000 | 0.17778 | 0.54025 | 0.12253 | Biso | 1.000 | O  |
| O60  | 1.0000 | 0.12603 | 0.52342 | 0.46246 | Biso | 1.000 | O  |
| O61  | 1.0000 | 0.02318 | 0.60268 | 0.17829 | Biso | 1.000 | O  |
| O62  | 1.0000 | 0.40652 | 0.86318 | 0.29482 | Biso | 1.000 | O  |
| O63  | 1.0000 | 0.17905 | 0.59406 | 0.30644 | Biso | 1.000 | O  |
| O64  | 1.0000 | 0.31569 | 0.95081 | 0.42732 | Biso | 1.000 | O  |
| P17  | 1.0000 | 0.15957 | 0.62505 | 0.40154 | Biso | 1.000 | P  |
| O65  | 1.0000 | 0.27081 | 0.72210 | 0.43873 | Biso | 1.000 | O  |
| O66  | 1.0000 | 0.38537 | 0.60537 | 0.10330 | Biso | 1.000 | O  |
| AI17 | 1.0000 | 0.26189 | 0.50903 | 0.86148 | Biso | 1.000 | AI |
| O67  | 1.0000 | 0.05262 | 0.93783 | 0.40785 | Biso | 1.000 | O  |
| O68  | 1.0000 | 0.46450 | 0.83603 | 0.14297 | Biso | 1.000 | O  |
| O69  | 1.0000 | 0.07122 | 0.66188 | 0.39931 | Biso | 1.000 | O  |
| AI18 | 1.0000 | 0.15850 | 0.62761 | 0.19629 | Biso | 1.000 | AI |
| O70  | 1.0000 | 0.21127 | 0.26543 | 0.95574 | Biso | 1.000 | O  |

|     |        |         |         |         |      |       |   |
|-----|--------|---------|---------|---------|------|-------|---|
| O71 | 1.0000 | 0.49639 | 0.25302 | 0.98572 | Biso | 1.000 | O |
| O72 | 1.0000 | 0.24709 | 0.51140 | 0.97710 | Biso | 1.000 | O |
| H1  | 1.0000 | 0.91175 | 0.72570 | 0.58798 | Biso | 1.000 | H |
| C1  | 1.0000 | 0.59445 | 0.49288 | 0.59789 | Biso | 1.000 | C |
| H2  | 1.0000 | 0.60826 | 0.44208 | 0.64593 | Biso | 1.000 | H |
| H3  | 1.0000 | 0.67123 | 0.54084 | 0.55973 | Biso | 1.000 | H |
| H4  | 1.0000 | 0.57879 | 0.55159 | 0.63505 | Biso | 1.000 | H |
| C2  | 1.0000 | 0.61943 | 0.79533 | 0.30869 | Biso | 1.000 | C |
| C3  | 1.0000 | 0.59534 | 0.60429 | 0.33945 | Biso | 1.000 | C |
| H5  | 1.0000 | 0.64888 | 0.61759 | 0.28269 | Biso | 1.000 | H |
| C4  | 1.0000 | 0.55677 | 0.50708 | 0.38711 | Biso | 1.000 | C |
| C5  | 1.0000 | 0.58139 | 0.41847 | 0.35488 | Biso | 1.000 | C |
| C6  | 1.0000 | 0.48988 | 0.49072 | 0.46658 | Biso | 1.000 | C |
| C7  | 1.0000 | 0.49274 | 0.41480 | 0.53884 | Biso | 1.000 | C |
| C8  | 1.0000 | 0.44789 | 0.56655 | 0.48067 | Biso | 1.000 | C |
| C9  | 1.0000 | 0.39356 | 0.57426 | 0.56627 | Biso | 1.000 | C |
| C10 | 1.0000 | 0.49130 | 0.66532 | 0.42616 | Biso | 1.000 | C |
| H6  | 1.0000 | 0.46364 | 0.72354 | 0.44198 | Biso | 1.000 | H |
| C11 | 1.0000 | 0.56751 | 0.68820 | 0.35998 | Biso | 1.000 | C |
| H7  | 1.0000 | 0.61262 | 0.77887 | 0.23776 | Biso | 1.000 | H |
| H8  | 1.0000 | 0.70847 | 0.84319 | 0.32367 | Biso | 1.000 | H |
| H9  | 1.0000 | 0.58145 | 0.84558 | 0.32416 | Biso | 1.000 | H |
| H10 | 1.0000 | 0.50395 | 0.33837 | 0.34715 | Biso | 1.000 | H |
| H11 | 1.0000 | 0.63508 | 0.40448 | 0.39963 | Biso | 1.000 | H |
| H12 | 1.0000 | 0.62246 | 0.44165 | 0.29040 | Biso | 1.000 | H |
| H13 | 1.0000 | 0.51268 | 0.35722 | 0.50520 | Biso | 1.000 | H |
| H14 | 1.0000 | 0.45839 | 0.62180 | 0.61554 | Biso | 1.000 | H |
| H15 | 1.0000 | 0.33498 | 0.49367 | 0.59477 | Biso | 1.000 | H |
| H16 | 1.0000 | 0.34945 | 0.61989 | 0.55378 | Biso | 1.000 | H |
| C12 | 1.0000 | 0.34015 | 0.44607 | 0.41283 | Biso | 1.000 | C |
| H17 | 1.0000 | 0.35914 | 0.47366 | 0.34449 | Biso | 1.000 | H |
| H18 | 1.0000 | 0.32244 | 0.36072 | 0.42203 | Biso | 1.000 | H |
| H19 | 1.0000 | 0.27217 | 0.45398 | 0.44095 | Biso | 1.000 | H |
| C13 | 1.0000 | 0.38967 | 0.34169 | 0.59692 | Biso | 1.000 | C |
| O73 | 1.0000 | 0.91390 | 0.71029 | 0.65097 | Biso | 1.000 | O |
| H20 | 1.0000 | 0.40357 | 0.27899 | 0.62934 | Biso | 1.000 | H |
| H21 | 1.0000 | 0.37742 | 0.38889 | 0.64935 | Biso | 1.000 | H |
| H22 | 1.0000 | 0.31292 | 0.29643 | 0.55858 | Biso | 1.000 | H |
| H23 | 1.0000 | 0.88781 | 0.75529 | 0.68070 | Biso | 1.000 | H |

TS9-10/C3 in TMB-based pathway

data\_image0

\_cell\_length\_a 13.8042  
 \_cell\_length\_b 13.8042  
 \_cell\_length\_c 15.044  
 \_cell\_angle\_alpha 90  
 \_cell\_angle\_beta 90  
 \_cell\_angle\_gamma 120

\_symmetry\_space\_group\_name\_H-M P 1

\_symmetry\_int\_tables\_number 1

loop\_

\_symmetry\_equiv\_pos\_as\_xyz  
 'x, y, z'

loop\_

\_atom\_site\_label  
 \_atom\_site\_occupancy  
 \_atom\_site\_fract\_x  
 \_atom\_site\_fract\_y  
 \_atom\_site\_fract\_z  
 \_atom\_site\_thermal\_displace\_type  
 \_atom\_site\_B\_iso\_or\_equiv  
 \_atom\_site\_type\_symbol

|     |        |         |         |         |      |       |    |
|-----|--------|---------|---------|---------|------|-------|----|
| P1  | 1.0000 | 0.04811 | 0.18238 | 0.52153 | Biso | 1.000 | P  |
| O1  | 1.0000 | 0.08495 | 0.30710 | 0.51071 | Biso | 1.000 | O  |
| O2  | 1.0000 | 0.28533 | 0.39830 | 0.83112 | Biso | 1.000 | O  |
| O3  | 1.0000 | 0.14573 | 0.49323 | 0.79276 | Biso | 1.000 | O  |
| Al1 | 1.0000 | 0.25788 | 0.27949 | 0.06350 | Biso | 1.000 | Al |
| O4  | 1.0000 | 0.17854 | 0.12594 | 0.27888 | Biso | 1.000 | O  |
| Al2 | 1.0000 | 0.05757 | 0.17888 | 0.72434 | Biso | 1.000 | Al |
| P2  | 1.0000 | 0.15475 | 0.07344 | 0.18466 | Biso | 1.000 | P  |
| Al3 | 1.0000 | 0.15096 | 0.07164 | 0.38936 | Biso | 1.000 | Al |
| O5  | 1.0000 | 0.08946 | 0.16325 | 0.61293 | Biso | 1.000 | O  |
| P3  | 1.0000 | 0.26508 | 0.27920 | 0.84945 | Biso | 1.000 | P  |
| O6  | 1.0000 | 0.37094 | 0.27594 | 0.82096 | Biso | 1.000 | O  |
| O7  | 1.0000 | 0.24643 | 0.04384 | 0.15915 | Biso | 1.000 | O  |
| O8  | 1.0000 | 0.48476 | 0.20350 | 0.14186 | Biso | 1.000 | O  |
| Al4 | 1.0000 | 0.04657 | 0.40930 | 0.52472 | Biso | 1.000 | Al |
| O9  | 1.0000 | 0.16588 | 0.19202 | 0.79365 | Biso | 1.000 | O  |
| P4  | 1.0000 | 0.26091 | 0.50879 | 0.06788 | Biso | 1.000 | P  |
| Al5 | 1.0000 | 0.38296 | 0.07757 | 0.19113 | Biso | 1.000 | Al |

|      |        |         |         |         |      |       |    |
|------|--------|---------|---------|---------|------|-------|----|
| O10  | 1.0000 | 0.23654 | 0.39042 | 0.09173 | Biso | 1.000 | O  |
| O11  | 1.0000 | 0.03589 | 0.29416 | 0.73317 | Biso | 1.000 | O  |
| O12  | 1.0000 | 0.40229 | 0.09891 | 0.30659 | Biso | 1.000 | O  |
| O13  | 1.0000 | 0.10092 | 0.14937 | 0.44658 | Biso | 1.000 | O  |
| O14  | 1.0000 | 0.07638 | 0.46047 | 0.63533 | Biso | 1.000 | O  |
| P5   | 1.0000 | 0.36845 | 0.06892 | 0.40501 | Biso | 1.000 | P  |
| O15  | 1.0000 | 0.28290 | 0.10295 | 0.43438 | Biso | 1.000 | O  |
| O16  | 1.0000 | 0.39613 | 0.31920 | 0.09622 | Biso | 1.000 | O  |
| P6   | 1.0000 | 0.05036 | 0.41285 | 0.73107 | Biso | 1.000 | P  |
| Al6  | 1.0000 | 0.48988 | 0.28120 | 0.86864 | Biso | 1.000 | Al |
| O17  | 1.0000 | 0.15666 | 0.15948 | 0.11788 | Biso | 1.000 | O  |
| Al7  | 1.0000 | 0.93577 | 0.62403 | 0.40292 | Biso | 1.000 | Al |
| P7   | 1.0000 | 0.72315 | 0.51795 | 0.85972 | Biso | 1.000 | P  |
| Al8  | 1.0000 | 0.58967 | 0.94295 | 0.72754 | Biso | 1.000 | Al |
| O18  | 1.0000 | 0.72439 | 0.62356 | 0.82341 | Biso | 1.000 | O  |
| O19  | 1.0000 | 0.95448 | 0.73454 | 0.15516 | Biso | 1.000 | O  |
| O20  | 1.0000 | 0.81711 | 0.83553 | 0.12503 | Biso | 1.000 | O  |
| O21  | 1.0000 | 0.56141 | 0.89747 | 0.61558 | Biso | 1.000 | O  |
| O22  | 1.0000 | 0.86532 | 0.88732 | 0.46281 | Biso | 1.000 | O  |
| O23  | 1.0000 | 0.91551 | 0.60295 | 0.28728 | Biso | 1.000 | O  |
| P8   | 1.0000 | 0.59862 | 0.95869 | 0.52453 | Biso | 1.000 | P  |
| O24  | 1.0000 | 0.69364 | 0.94439 | 0.48558 | Biso | 1.000 | O  |
| O25  | 1.0000 | 0.58330 | 0.71994 | 0.84485 | Biso | 1.000 | O  |
| O26  | 1.0000 | 0.81234 | 0.85363 | 0.78575 | Biso | 1.000 | O  |
| P9   | 1.0000 | 0.92975 | 0.61711 | 0.18552 | Biso | 1.000 | P  |
| Al9  | 1.0000 | 0.48353 | 0.73698 | 0.06188 | Biso | 1.000 | Al |
| Si1  | 1.0000 | 0.92871 | 0.84051 | 0.40040 | Biso | 1.000 | Si |
| O27  | 1.0000 | 0.91433 | 0.72672 | 0.45055 | Biso | 1.000 | O  |
| O28  | 1.0000 | 0.68982 | 0.62944 | 0.08604 | Biso | 1.000 | O  |
| O29  | 1.0000 | 0.49917 | 0.90780 | 0.46012 | Biso | 1.000 | O  |
| Al10 | 1.0000 | 0.72100 | 0.74466 | 0.85664 | Biso | 1.000 | Al |
| O30  | 1.0000 | 0.81737 | 0.92654 | 0.63474 | Biso | 1.000 | O  |
| O31  | 1.0000 | 0.82072 | 0.52582 | 0.14120 | Biso | 1.000 | O  |
| P10  | 1.0000 | 0.82282 | 0.95567 | 0.73427 | Biso | 1.000 | P  |
| Al11 | 1.0000 | 0.92108 | 0.83659 | 0.19509 | Biso | 1.000 | Al |
| Al12 | 1.0000 | 0.82541 | 0.96696 | 0.52104 | Biso | 1.000 | Al |
| O32  | 1.0000 | 0.87155 | 0.80605 | 0.30239 | Biso | 1.000 | O  |
| O33  | 1.0000 | 0.84026 | 0.49780 | 0.45654 | Biso | 1.000 | O  |
| O34  | 1.0000 | 0.49316 | 0.83304 | 0.79371 | Biso | 1.000 | O  |
| P11  | 1.0000 | 0.72437 | 0.75251 | 0.06331 | Biso | 1.000 | P  |
| O35  | 1.0000 | 0.62114 | 0.76629 | 0.07490 | Biso | 1.000 | O  |
| O36  | 1.0000 | 0.72736 | 0.97906 | 0.75934 | Biso | 1.000 | O  |
| O37  | 1.0000 | 0.82338 | 0.44030 | 0.61736 | Biso | 1.000 | O  |
| O38  | 1.0000 | 0.47502 | 0.13555 | 0.46153 | Biso | 1.000 | O  |

|      |        |         |         |         |      |       |    |
|------|--------|---------|---------|---------|------|-------|----|
| O39  | 1.0000 | 0.64108 | 0.08515 | 0.53796 | Biso | 1.000 | O  |
| P12  | 1.0000 | 0.81723 | 0.40105 | 0.51937 | Biso | 1.000 | P  |
| O40  | 1.0000 | 0.69726 | 0.30671 | 0.49795 | Biso | 1.000 | O  |
| O41  | 1.0000 | 0.59985 | 0.42141 | 0.86208 | Biso | 1.000 | O  |
| O42  | 1.0000 | 0.51868 | 0.19042 | 0.80843 | Biso | 1.000 | O  |
| AI13 | 1.0000 | 0.72362 | 0.52365 | 0.06499 | Biso | 1.000 | AI |
| O43  | 1.0000 | 0.91846 | 0.11394 | 0.51747 | Biso | 1.000 | O  |
| AI14 | 1.0000 | 0.81850 | 0.40026 | 0.73003 | Biso | 1.000 | AI |
| O44  | 1.0000 | 0.90202 | 0.35946 | 0.50451 | Biso | 1.000 | O  |
| P13  | 1.0000 | 0.58592 | 0.17346 | 0.73482 | Biso | 1.000 | P  |
| O45  | 1.0000 | 0.56684 | 0.05475 | 0.74566 | Biso | 1.000 | O  |
| AI15 | 1.0000 | 0.58712 | 0.17712 | 0.53356 | Biso | 1.000 | AI |
| O46  | 1.0000 | 0.93530 | 0.05837 | 0.75973 | Biso | 1.000 | O  |
| O47  | 1.0000 | 0.79322 | 0.49034 | 0.79588 | Biso | 1.000 | O  |
| P14  | 1.0000 | 0.48732 | 0.28838 | 0.07416 | Biso | 1.000 | P  |
| O48  | 1.0000 | 0.60265 | 0.39412 | 0.07895 | Biso | 1.000 | O  |
| O49  | 1.0000 | 0.71257 | 0.25913 | 0.74389 | Biso | 1.000 | O  |
| O50  | 1.0000 | 0.94206 | 0.40650 | 0.76542 | Biso | 1.000 | O  |
| O51  | 1.0000 | 0.54357 | 0.18797 | 0.64261 | Biso | 1.000 | O  |
| O52  | 1.0000 | 0.46576 | 0.76510 | 0.95027 | Biso | 1.000 | O  |
| O53  | 1.0000 | 0.77438 | 0.53849 | 0.95411 | Biso | 1.000 | O  |
| O54  | 1.0000 | 0.76800 | 0.77992 | 0.96634 | Biso | 1.000 | O  |
| P15  | 1.0000 | 0.38390 | 0.85409 | 0.18486 | Biso | 1.000 | P  |
| O55  | 1.0000 | 0.40908 | 0.97133 | 0.15492 | Biso | 1.000 | O  |
| AI16 | 1.0000 | 0.37480 | 0.85320 | 0.39887 | Biso | 1.000 | AI |
| P16  | 1.0000 | 0.48090 | 0.73726 | 0.85356 | Biso | 1.000 | P  |
| O56  | 1.0000 | 0.37732 | 0.62935 | 0.82145 | Biso | 1.000 | O  |
| O57  | 1.0000 | 0.25949 | 0.76830 | 0.16436 | Biso | 1.000 | O  |
| O58  | 1.0000 | 0.03949 | 0.96852 | 0.17841 | Biso | 1.000 | O  |
| O59  | 1.0000 | 0.18743 | 0.53523 | 0.12814 | Biso | 1.000 | O  |
| O60  | 1.0000 | 0.13687 | 0.51416 | 0.45154 | Biso | 1.000 | O  |
| O61  | 1.0000 | 0.02613 | 0.59901 | 0.15409 | Biso | 1.000 | O  |
| O62  | 1.0000 | 0.40749 | 0.85418 | 0.28549 | Biso | 1.000 | O  |
| O63  | 1.0000 | 0.16278 | 0.60239 | 0.30226 | Biso | 1.000 | O  |
| O64  | 1.0000 | 0.31798 | 0.94108 | 0.41845 | Biso | 1.000 | O  |
| P17  | 1.0000 | 0.16245 | 0.62264 | 0.40316 | Biso | 1.000 | P  |
| O65  | 1.0000 | 0.27881 | 0.71684 | 0.43402 | Biso | 1.000 | O  |
| O66  | 1.0000 | 0.38724 | 0.59370 | 0.08302 | Biso | 1.000 | O  |
| AI17 | 1.0000 | 0.25800 | 0.50715 | 0.85643 | Biso | 1.000 | AI |
| O67  | 1.0000 | 0.06216 | 0.92971 | 0.39158 | Biso | 1.000 | O  |
| O68  | 1.0000 | 0.46263 | 0.82484 | 0.13370 | Biso | 1.000 | O  |
| O69  | 1.0000 | 0.07422 | 0.65591 | 0.42765 | Biso | 1.000 | O  |
| AI18 | 1.0000 | 0.15911 | 0.62700 | 0.18789 | Biso | 1.000 | AI |
| O70  | 1.0000 | 0.23943 | 0.24975 | 0.94868 | Biso | 1.000 | O  |

|     |        |         |         |         |      |       |   |
|-----|--------|---------|---------|---------|------|-------|---|
| O71 | 1.0000 | 0.46620 | 0.23573 | 0.97984 | Biso | 1.000 | O |
| O72 | 1.0000 | 0.22907 | 0.51317 | 0.96958 | Biso | 1.000 | O |
| H1  | 1.0000 | 0.90723 | 0.72975 | 0.55956 | Biso | 1.000 | H |
| C1  | 1.0000 | 0.56400 | 0.45714 | 0.64833 | Biso | 1.000 | C |
| H2  | 1.0000 | 0.49000 | 0.38336 | 0.62272 | Biso | 1.000 | H |
| H3  | 1.0000 | 0.61619 | 0.42556 | 0.67559 | Biso | 1.000 | H |
| H4  | 1.0000 | 0.54045 | 0.49488 | 0.70139 | Biso | 1.000 | H |
| C2  | 1.0000 | 0.62059 | 0.78569 | 0.31104 | Biso | 1.000 | C |
| C3  | 1.0000 | 0.56051 | 0.58201 | 0.33085 | Biso | 1.000 | C |
| H5  | 1.0000 | 0.60828 | 0.58786 | 0.27177 | Biso | 1.000 | H |
| C4  | 1.0000 | 0.50058 | 0.47915 | 0.37378 | Biso | 1.000 | C |
| C5  | 1.0000 | 0.50362 | 0.37970 | 0.33601 | Biso | 1.000 | C |
| C6  | 1.0000 | 0.43619 | 0.46941 | 0.45025 | Biso | 1.000 | C |
| C7  | 1.0000 | 0.62650 | 0.53622 | 0.57598 | Biso | 1.000 | C |
| C8  | 1.0000 | 0.43541 | 0.56484 | 0.48243 | Biso | 1.000 | C |
| C9  | 1.0000 | 0.37452 | 0.56293 | 0.56657 | Biso | 1.000 | C |
| C10 | 1.0000 | 0.49632 | 0.66585 | 0.43711 | Biso | 1.000 | C |
| H6  | 1.0000 | 0.49469 | 0.73775 | 0.46274 | Biso | 1.000 | H |
| C11 | 1.0000 | 0.55829 | 0.67678 | 0.36056 | Biso | 1.000 | C |
| H7  | 1.0000 | 0.62865 | 0.77080 | 0.24136 | Biso | 1.000 | H |
| H8  | 1.0000 | 0.70507 | 0.83645 | 0.33682 | Biso | 1.000 | H |
| H9  | 1.0000 | 0.57900 | 0.83464 | 0.31558 | Biso | 1.000 | H |
| H10 | 1.0000 | 0.42066 | 0.31504 | 0.31405 | Biso | 1.000 | H |
| H11 | 1.0000 | 0.53252 | 0.34093 | 0.38462 | Biso | 1.000 | H |
| H12 | 1.0000 | 0.55976 | 0.40405 | 0.27905 | Biso | 1.000 | H |
| H13 | 1.0000 | 0.64833 | 0.50311 | 0.51869 | Biso | 1.000 | H |
| H14 | 1.0000 | 0.41566 | 0.55413 | 0.62584 | Biso | 1.000 | H |
| H15 | 1.0000 | 0.28880 | 0.49364 | 0.56776 | Biso | 1.000 | H |
| H16 | 1.0000 | 0.37192 | 0.64011 | 0.57401 | Biso | 1.000 | H |
| C12 | 1.0000 | 0.36263 | 0.35616 | 0.49068 | Biso | 1.000 | C |
| H17 | 1.0000 | 0.40408 | 0.30685 | 0.49585 | Biso | 1.000 | H |
| H18 | 1.0000 | 0.33155 | 0.36033 | 0.55618 | Biso | 1.000 | H |
| H19 | 1.0000 | 0.28989 | 0.30894 | 0.44828 | Biso | 1.000 | H |
| C13 | 1.0000 | 0.67169 | 0.65026 | 0.58140 | Biso | 1.000 | C |
| O73 | 1.0000 | 0.88184 | 0.71570 | 0.62388 | Biso | 1.000 | O |
| H20 | 1.0000 | 0.77188 | 0.67240 | 0.60928 | Biso | 1.000 | H |
| H21 | 1.0000 | 0.64220 | 0.68380 | 0.63349 | Biso | 1.000 | H |
| H22 | 1.0000 | 0.69991 | 0.69868 | 0.52050 | Biso | 1.000 | H |
| H23 | 1.0000 | 0.90713 | 0.78843 | 0.65128 | Biso | 1.000 | H |

TS1-2 in PX-based pathway

data\_image0

\_cell\_length\_a 13.8042  
 \_cell\_length\_b 13.8042  
 \_cell\_length\_c 15.044  
 \_cell\_angle\_alpha 90  
 \_cell\_angle\_beta 90  
 \_cell\_angle\_gamma 120

\_symmetry\_space\_group\_name\_H-M P 1

\_symmetry\_int\_tables\_number 1

loop\_

\_symmetry\_equiv\_pos\_as\_xyz  
 'x, y, z'

loop\_

\_atom\_site\_label  
 \_atom\_site\_occupancy  
 \_atom\_site\_fract\_x  
 \_atom\_site\_fract\_y  
 \_atom\_site\_fract\_z  
 \_atom\_site\_thermal\_displace\_type  
 \_atom\_site\_B\_iso\_or\_equiv  
 \_atom\_site\_type\_symbol

|     |        |         |         |         |      |       |    |
|-----|--------|---------|---------|---------|------|-------|----|
| P1  | 1.0000 | 0.05598 | 0.18000 | 0.53087 | Biso | 1.000 | P  |
| O1  | 1.0000 | 0.09074 | 0.30429 | 0.52012 | Biso | 1.000 | O  |
| O2  | 1.0000 | 0.29391 | 0.40027 | 0.82939 | Biso | 1.000 | O  |
| O3  | 1.0000 | 0.14824 | 0.49100 | 0.79709 | Biso | 1.000 | O  |
| Al1 | 1.0000 | 0.27048 | 0.28242 | 0.07302 | Biso | 1.000 | Al |
| O4  | 1.0000 | 0.16986 | 0.12120 | 0.28469 | Biso | 1.000 | O  |
| Al2 | 1.0000 | 0.04913 | 0.17730 | 0.73697 | Biso | 1.000 | Al |
| P2  | 1.0000 | 0.15786 | 0.06886 | 0.19134 | Biso | 1.000 | P  |
| Al3 | 1.0000 | 0.15555 | 0.07057 | 0.39615 | Biso | 1.000 | Al |
| O5  | 1.0000 | 0.08386 | 0.15994 | 0.62721 | Biso | 1.000 | O  |
| P3  | 1.0000 | 0.26481 | 0.27971 | 0.85557 | Biso | 1.000 | P  |
| O6  | 1.0000 | 0.35932 | 0.25981 | 0.82184 | Biso | 1.000 | O  |
| O7  | 1.0000 | 0.24988 | 0.03615 | 0.17748 | Biso | 1.000 | O  |
| O8  | 1.0000 | 0.48826 | 0.19240 | 0.13707 | Biso | 1.000 | O  |
| Al4 | 1.0000 | 0.05478 | 0.40822 | 0.53009 | Biso | 1.000 | Al |
| O9  | 1.0000 | 0.15449 | 0.19323 | 0.81108 | Biso | 1.000 | O  |
| P4  | 1.0000 | 0.25688 | 0.49819 | 0.07267 | Biso | 1.000 | P  |
| Al5 | 1.0000 | 0.39065 | 0.07595 | 0.19829 | Biso | 1.000 | Al |

|      |        |         |         |         |      |       |    |
|------|--------|---------|---------|---------|------|-------|----|
| O10  | 1.0000 | 0.25242 | 0.39269 | 0.11188 | Biso | 1.000 | O  |
| O11  | 1.0000 | 0.02423 | 0.29125 | 0.74216 | Biso | 1.000 | O  |
| O12  | 1.0000 | 0.42624 | 0.11552 | 0.31059 | Biso | 1.000 | O  |
| O13  | 1.0000 | 0.12522 | 0.15541 | 0.46486 | Biso | 1.000 | O  |
| O14  | 1.0000 | 0.07595 | 0.45786 | 0.64096 | Biso | 1.000 | O  |
| P5   | 1.0000 | 0.38115 | 0.07465 | 0.40579 | Biso | 1.000 | P  |
| O15  | 1.0000 | 0.29183 | 0.10449 | 0.43164 | Biso | 1.000 | O  |
| O16  | 1.0000 | 0.40959 | 0.31952 | 0.10157 | Biso | 1.000 | O  |
| P6   | 1.0000 | 0.04855 | 0.41368 | 0.73763 | Biso | 1.000 | P  |
| AI6  | 1.0000 | 0.48526 | 0.27678 | 0.86598 | Biso | 1.000 | AI |
| O17  | 1.0000 | 0.17128 | 0.15619 | 0.12080 | Biso | 1.000 | O  |
| AI7  | 1.0000 | 0.92970 | 0.61123 | 0.40005 | Biso | 1.000 | AI |
| P7   | 1.0000 | 0.71395 | 0.50846 | 0.85296 | Biso | 1.000 | P  |
| AI8  | 1.0000 | 0.58437 | 0.93531 | 0.73162 | Biso | 1.000 | AI |
| O18  | 1.0000 | 0.72594 | 0.62271 | 0.83024 | Biso | 1.000 | O  |
| O19  | 1.0000 | 0.96114 | 0.73086 | 0.16707 | Biso | 1.000 | O  |
| O20  | 1.0000 | 0.82125 | 0.82246 | 0.12282 | Biso | 1.000 | O  |
| O21  | 1.0000 | 0.56287 | 0.88364 | 0.62103 | Biso | 1.000 | O  |
| O22  | 1.0000 | 0.86316 | 0.87185 | 0.47476 | Biso | 1.000 | O  |
| O23  | 1.0000 | 0.88426 | 0.57983 | 0.28770 | Biso | 1.000 | O  |
| P8   | 1.0000 | 0.59834 | 0.94331 | 0.52919 | Biso | 1.000 | P  |
| O24  | 1.0000 | 0.69576 | 0.93376 | 0.48933 | Biso | 1.000 | O  |
| O25  | 1.0000 | 0.57348 | 0.70567 | 0.83053 | Biso | 1.000 | O  |
| O26  | 1.0000 | 0.80708 | 0.84861 | 0.78931 | Biso | 1.000 | O  |
| P9   | 1.0000 | 0.92962 | 0.60977 | 0.19147 | Biso | 1.000 | P  |
| AI9  | 1.0000 | 0.49180 | 0.73497 | 0.06740 | Biso | 1.000 | AI |
| Si1  | 1.0000 | 0.93007 | 0.83551 | 0.40588 | Biso | 1.000 | Si |
| O27  | 1.0000 | 0.91619 | 0.71813 | 0.44698 | Biso | 1.000 | O  |
| O28  | 1.0000 | 0.70089 | 0.61930 | 0.07273 | Biso | 1.000 | O  |
| O29  | 1.0000 | 0.49894 | 0.88635 | 0.46520 | Biso | 1.000 | O  |
| AI10 | 1.0000 | 0.71203 | 0.73881 | 0.85753 | Biso | 1.000 | AI |
| O30  | 1.0000 | 0.81771 | 0.93150 | 0.64139 | Biso | 1.000 | O  |
| O31  | 1.0000 | 0.83897 | 0.52521 | 0.12740 | Biso | 1.000 | O  |
| P10  | 1.0000 | 0.81844 | 0.95334 | 0.74183 | Biso | 1.000 | P  |
| AI11 | 1.0000 | 0.92465 | 0.83369 | 0.19912 | Biso | 1.000 | AI |
| AI12 | 1.0000 | 0.82954 | 0.96111 | 0.52529 | Biso | 1.000 | AI |
| O32  | 1.0000 | 0.87467 | 0.81265 | 0.30650 | Biso | 1.000 | O  |
| O33  | 1.0000 | 0.84010 | 0.49138 | 0.46278 | Biso | 1.000 | O  |
| O34  | 1.0000 | 0.48571 | 0.82644 | 0.79822 | Biso | 1.000 | O  |
| P11  | 1.0000 | 0.72106 | 0.74014 | 0.06680 | Biso | 1.000 | P  |
| O35  | 1.0000 | 0.61456 | 0.73777 | 0.10189 | Biso | 1.000 | O  |
| O36  | 1.0000 | 0.72072 | 0.97315 | 0.76757 | Biso | 1.000 | O  |
| O37  | 1.0000 | 0.81883 | 0.41385 | 0.61641 | Biso | 1.000 | O  |
| O38  | 1.0000 | 0.47912 | 0.13584 | 0.47108 | Biso | 1.000 | O  |



|      |        |         |         |         |      |       |    |
|------|--------|---------|---------|---------|------|-------|----|
| O39  | 1.0000 | 0.63583 | 0.06870 | 0.54265 | Biso | 1.000 | O  |
| P12  | 1.0000 | 0.82154 | 0.38919 | 0.51636 | Biso | 1.000 | P  |
| O40  | 1.0000 | 0.70757 | 0.29034 | 0.48713 | Biso | 1.000 | O  |
| O41  | 1.0000 | 0.58700 | 0.42056 | 0.85673 | Biso | 1.000 | O  |
| O42  | 1.0000 | 0.52035 | 0.18967 | 0.80696 | Biso | 1.000 | O  |
| AI13 | 1.0000 | 0.73334 | 0.51244 | 0.05617 | Biso | 1.000 | AI |
| O43  | 1.0000 | 0.92832 | 0.10654 | 0.51336 | Biso | 1.000 | O  |
| AI14 | 1.0000 | 0.81491 | 0.39074 | 0.73160 | Biso | 1.000 | AI |
| O44  | 1.0000 | 0.91438 | 0.35947 | 0.49804 | Biso | 1.000 | O  |
| P13  | 1.0000 | 0.59187 | 0.17137 | 0.73812 | Biso | 1.000 | P  |
| O45  | 1.0000 | 0.56089 | 0.04804 | 0.74333 | Biso | 1.000 | O  |
| AI15 | 1.0000 | 0.59607 | 0.17145 | 0.53560 | Biso | 1.000 | AI |
| O46  | 1.0000 | 0.92827 | 0.05590 | 0.77220 | Biso | 1.000 | O  |
| O47  | 1.0000 | 0.77109 | 0.47884 | 0.77858 | Biso | 1.000 | O  |
| P14  | 1.0000 | 0.49537 | 0.28334 | 0.07394 | Biso | 1.000 | P  |
| O48  | 1.0000 | 0.61387 | 0.38447 | 0.08084 | Biso | 1.000 | O  |
| O49  | 1.0000 | 0.71862 | 0.24832 | 0.75774 | Biso | 1.000 | O  |
| O50  | 1.0000 | 0.94579 | 0.41905 | 0.77199 | Biso | 1.000 | O  |
| O51  | 1.0000 | 0.56526 | 0.19940 | 0.64416 | Biso | 1.000 | O  |
| O52  | 1.0000 | 0.50637 | 0.78179 | 0.95620 | Biso | 1.000 | O  |
| O53  | 1.0000 | 0.77075 | 0.51326 | 0.94308 | Biso | 1.000 | O  |
| O54  | 1.0000 | 0.74310 | 0.78035 | 0.96882 | Biso | 1.000 | O  |
| P15  | 1.0000 | 0.39067 | 0.84763 | 0.19111 | Biso | 1.000 | P  |
| O55  | 1.0000 | 0.41209 | 0.96520 | 0.16790 | Biso | 1.000 | O  |
| AI16 | 1.0000 | 0.37962 | 0.84930 | 0.40174 | Biso | 1.000 | AI |
| P16  | 1.0000 | 0.48407 | 0.73657 | 0.85986 | Biso | 1.000 | P  |
| O56  | 1.0000 | 0.36817 | 0.63225 | 0.85129 | Biso | 1.000 | O  |
| O57  | 1.0000 | 0.26731 | 0.76047 | 0.16853 | Biso | 1.000 | O  |
| O58  | 1.0000 | 0.04271 | 0.96530 | 0.17724 | Biso | 1.000 | O  |
| O59  | 1.0000 | 0.18080 | 0.52550 | 0.12853 | Biso | 1.000 | O  |
| O60  | 1.0000 | 0.14909 | 0.51632 | 0.46137 | Biso | 1.000 | O  |
| O61  | 1.0000 | 0.03279 | 0.59595 | 0.18012 | Biso | 1.000 | O  |
| O62  | 1.0000 | 0.41489 | 0.83998 | 0.29066 | Biso | 1.000 | O  |
| O63  | 1.0000 | 0.19133 | 0.59498 | 0.30738 | Biso | 1.000 | O  |
| O64  | 1.0000 | 0.33222 | 0.94614 | 0.41197 | Biso | 1.000 | O  |
| P17  | 1.0000 | 0.16914 | 0.61704 | 0.40421 | Biso | 1.000 | P  |
| O65  | 1.0000 | 0.27440 | 0.72010 | 0.44205 | Biso | 1.000 | O  |
| O66  | 1.0000 | 0.37995 | 0.59546 | 0.07431 | Biso | 1.000 | O  |
| AI17 | 1.0000 | 0.25468 | 0.49832 | 0.86471 | Biso | 1.000 | AI |
| O67  | 1.0000 | 0.06303 | 0.92943 | 0.40125 | Biso | 1.000 | O  |
| O68  | 1.0000 | 0.47204 | 0.82597 | 0.13601 | Biso | 1.000 | O  |
| O69  | 1.0000 | 0.06930 | 0.63771 | 0.40767 | Biso | 1.000 | O  |
| AI18 | 1.0000 | 0.16763 | 0.62073 | 0.19687 | Biso | 1.000 | AI |
| O70  | 1.0000 | 0.25253 | 0.26546 | 0.95709 | Biso | 1.000 | O  |

|     |        |         |         |         |      |       |   |
|-----|--------|---------|---------|---------|------|-------|---|
| O71 | 1.0000 | 0.46960 | 0.23535 | 0.97814 | Biso | 1.000 | O |
| O72 | 1.0000 | 0.21110 | 0.47443 | 0.97630 | Biso | 1.000 | O |
| H1  | 1.0000 | 0.86938 | 0.70268 | 0.56196 | Biso | 1.000 | H |
| C1  | 1.0000 | 0.65555 | 0.59199 | 0.58601 | Biso | 1.000 | C |
| O73 | 1.0000 | 0.83521 | 0.68729 | 0.62205 | Biso | 1.000 | O |
| H2  | 1.0000 | 0.64291 | 0.65177 | 0.62273 | Biso | 1.000 | H |
| H3  | 1.0000 | 0.65519 | 0.52433 | 0.62195 | Biso | 1.000 | H |
| H4  | 1.0000 | 0.68547 | 0.60978 | 0.51870 | Biso | 1.000 | H |
| H5  | 1.0000 | 0.84822 | 0.75962 | 0.64269 | Biso | 1.000 | H |
| H6  | 1.0000 | 0.54139 | 0.37153 | 0.38014 | Biso | 1.000 | H |
| C2  | 1.0000 | 0.49435 | 0.41707 | 0.50203 | Biso | 1.000 | C |
| H7  | 1.0000 | 0.48449 | 0.34441 | 0.53784 | Biso | 1.000 | H |
| C3  | 1.0000 | 0.47704 | 0.49701 | 0.54849 | Biso | 1.000 | C |
| C4  | 1.0000 | 0.41951 | 0.46776 | 0.63783 | Biso | 1.000 | C |
| C5  | 1.0000 | 0.48265 | 0.58707 | 0.49790 | Biso | 1.000 | C |
| H8  | 1.0000 | 0.46487 | 0.64654 | 0.53078 | Biso | 1.000 | H |
| C6  | 1.0000 | 0.51307 | 0.60095 | 0.40939 | Biso | 1.000 | C |
| H9  | 1.0000 | 0.52077 | 0.67245 | 0.37310 | Biso | 1.000 | H |
| C7  | 1.0000 | 0.53610 | 0.52425 | 0.36572 | Biso | 1.000 | C |
| C8  | 1.0000 | 0.57292 | 0.54252 | 0.27069 | Biso | 1.000 | C |
| C9  | 1.0000 | 0.52497 | 0.43162 | 0.41329 | Biso | 1.000 | C |
| H10 | 1.0000 | 0.43722 | 0.54219 | 0.67584 | Biso | 1.000 | H |
| H11 | 1.0000 | 0.44358 | 0.41725 | 0.67772 | Biso | 1.000 | H |
| H12 | 1.0000 | 0.32895 | 0.41867 | 0.62766 | Biso | 1.000 | H |
| H13 | 1.0000 | 0.60860 | 0.49063 | 0.25216 | Biso | 1.000 | H |
| H14 | 1.0000 | 0.63483 | 0.63016 | 0.25947 | Biso | 1.000 | H |
| H15 | 1.0000 | 0.50222 | 0.52180 | 0.22640 | Biso | 1.000 | H |

TS2-3 in PX-based pathway

data\_image0

\_cell\_length\_a 13.8042  
 \_cell\_length\_b 13.8042  
 \_cell\_length\_c 15.044  
 \_cell\_angle\_alpha 90  
 \_cell\_angle\_beta 90  
 \_cell\_angle\_gamma 120

\_symmetry\_space\_group\_name\_H-M P 1

\_symmetry\_int\_tables\_number 1

loop\_

\_symmetry\_equiv\_pos\_as\_xyz  
 'x, y, z'

loop\_

\_atom\_site\_label  
 \_atom\_site\_occupancy  
 \_atom\_site\_fract\_x  
 \_atom\_site\_fract\_y  
 \_atom\_site\_fract\_z  
 \_atom\_site\_thermal\_displace\_type  
 \_atom\_site\_B\_iso\_or\_equiv  
 \_atom\_site\_type\_symbol

|     |        |         |         |         |      |       |    |
|-----|--------|---------|---------|---------|------|-------|----|
| P1  | 1.0000 | 0.04690 | 0.17251 | 0.52175 | Biso | 1.000 | P  |
| O1  | 1.0000 | 0.06791 | 0.28550 | 0.48382 | Biso | 1.000 | O  |
| O2  | 1.0000 | 0.29147 | 0.39535 | 0.83333 | Biso | 1.000 | O  |
| O3  | 1.0000 | 0.14741 | 0.48448 | 0.78778 | Biso | 1.000 | O  |
| Al1 | 1.0000 | 0.26068 | 0.27192 | 0.06376 | Biso | 1.000 | Al |
| O4  | 1.0000 | 0.16889 | 0.10906 | 0.28320 | Biso | 1.000 | O  |
| Al2 | 1.0000 | 0.05523 | 0.17717 | 0.72526 | Biso | 1.000 | Al |
| P2  | 1.0000 | 0.15155 | 0.06286 | 0.18704 | Biso | 1.000 | P  |
| Al3 | 1.0000 | 0.14177 | 0.04754 | 0.39157 | Biso | 1.000 | Al |
| O5  | 1.0000 | 0.10378 | 0.19213 | 0.61449 | Biso | 1.000 | O  |
| P3  | 1.0000 | 0.26418 | 0.27315 | 0.84977 | Biso | 1.000 | P  |
| O6  | 1.0000 | 0.36489 | 0.26230 | 0.81820 | Biso | 1.000 | O  |
| O7  | 1.0000 | 0.24230 | 0.03086 | 0.16387 | Biso | 1.000 | O  |
| O8  | 1.0000 | 0.48098 | 0.18498 | 0.13180 | Biso | 1.000 | O  |
| Al4 | 1.0000 | 0.04529 | 0.39409 | 0.51931 | Biso | 1.000 | Al |
| O9  | 1.0000 | 0.16128 | 0.18920 | 0.79614 | Biso | 1.000 | O  |
| P4  | 1.0000 | 0.25876 | 0.49852 | 0.06453 | Biso | 1.000 | P  |
| Al5 | 1.0000 | 0.38104 | 0.06961 | 0.19305 | Biso | 1.000 | Al |

|      |        |         |         |         |      |       |    |
|------|--------|---------|---------|---------|------|-------|----|
| O10  | 1.0000 | 0.24340 | 0.38509 | 0.09452 | Biso | 1.000 | O  |
| O11  | 1.0000 | 0.01632 | 0.27815 | 0.75252 | Biso | 1.000 | O  |
| O12  | 1.0000 | 0.40449 | 0.10899 | 0.30605 | Biso | 1.000 | O  |
| O13  | 1.0000 | 0.09697 | 0.12304 | 0.45806 | Biso | 1.000 | O  |
| O14  | 1.0000 | 0.07680 | 0.42705 | 0.63280 | Biso | 1.000 | O  |
| P5   | 1.0000 | 0.37531 | 0.07065 | 0.40396 | Biso | 1.000 | P  |
| O15  | 1.0000 | 0.27261 | 0.07636 | 0.43583 | Biso | 1.000 | O  |
| O16  | 1.0000 | 0.39969 | 0.30867 | 0.09191 | Biso | 1.000 | O  |
| P6   | 1.0000 | 0.04655 | 0.40050 | 0.73212 | Biso | 1.000 | P  |
| Al6  | 1.0000 | 0.49116 | 0.28103 | 0.86165 | Biso | 1.000 | Al |
| O17  | 1.0000 | 0.16191 | 0.15492 | 0.12266 | Biso | 1.000 | O  |
| Al7  | 1.0000 | 0.92370 | 0.60543 | 0.39706 | Biso | 1.000 | Al |
| P7   | 1.0000 | 0.71734 | 0.50981 | 0.85611 | Biso | 1.000 | P  |
| Al8  | 1.0000 | 0.59670 | 0.94473 | 0.73370 | Biso | 1.000 | Al |
| O18  | 1.0000 | 0.73476 | 0.62211 | 0.82006 | Biso | 1.000 | O  |
| O19  | 1.0000 | 0.95525 | 0.72705 | 0.15355 | Biso | 1.000 | O  |
| O20  | 1.0000 | 0.81980 | 0.82342 | 0.11251 | Biso | 1.000 | O  |
| O21  | 1.0000 | 0.56875 | 0.91801 | 0.61967 | Biso | 1.000 | O  |
| O22  | 1.0000 | 0.86092 | 0.87345 | 0.46094 | Biso | 1.000 | O  |
| O23  | 1.0000 | 0.91448 | 0.59023 | 0.28089 | Biso | 1.000 | O  |
| P8   | 1.0000 | 0.59155 | 0.93925 | 0.51893 | Biso | 1.000 | P  |
| O24  | 1.0000 | 0.69194 | 0.92763 | 0.49058 | Biso | 1.000 | O  |
| O25  | 1.0000 | 0.57638 | 0.70117 | 0.82037 | Biso | 1.000 | O  |
| O26  | 1.0000 | 0.81554 | 0.85051 | 0.79763 | Biso | 1.000 | O  |
| P9   | 1.0000 | 0.93171 | 0.60894 | 0.17979 | Biso | 1.000 | P  |
| Al9  | 1.0000 | 0.48798 | 0.73050 | 0.05972 | Biso | 1.000 | Al |
| Si1  | 1.0000 | 0.91602 | 0.82214 | 0.39453 | Biso | 1.000 | Si |
| O27  | 1.0000 | 0.89023 | 0.70187 | 0.44086 | Biso | 1.000 | O  |
| O28  | 1.0000 | 0.68786 | 0.61365 | 0.08835 | Biso | 1.000 | O  |
| O29  | 1.0000 | 0.48766 | 0.85008 | 0.46876 | Biso | 1.000 | O  |
| Al10 | 1.0000 | 0.71227 | 0.73153 | 0.85298 | Biso | 1.000 | Al |
| O30  | 1.0000 | 0.80483 | 0.89210 | 0.63730 | Biso | 1.000 | O  |
| O31  | 1.0000 | 0.82577 | 0.51704 | 0.13289 | Biso | 1.000 | O  |
| P10  | 1.0000 | 0.82387 | 0.94128 | 0.73336 | Biso | 1.000 | P  |
| Al11 | 1.0000 | 0.91786 | 0.82740 | 0.19043 | Biso | 1.000 | Al |
| Al12 | 1.0000 | 0.82226 | 0.94837 | 0.52599 | Biso | 1.000 | Al |
| O32  | 1.0000 | 0.86013 | 0.79716 | 0.29569 | Biso | 1.000 | O  |
| O33  | 1.0000 | 0.82647 | 0.47486 | 0.44365 | Biso | 1.000 | O  |
| O34  | 1.0000 | 0.49471 | 0.82625 | 0.78985 | Biso | 1.000 | O  |
| P11  | 1.0000 | 0.71222 | 0.73411 | 0.06798 | Biso | 1.000 | P  |
| O35  | 1.0000 | 0.61288 | 0.74538 | 0.10266 | Biso | 1.000 | O  |
| O36  | 1.0000 | 0.73495 | 0.97481 | 0.75615 | Biso | 1.000 | O  |
| O37  | 1.0000 | 0.83287 | 0.44867 | 0.60985 | Biso | 1.000 | O  |
| O38  | 1.0000 | 0.47475 | 0.15347 | 0.46179 | Biso | 1.000 | O  |

|      |        |         |         |         |      |       |    |
|------|--------|---------|---------|---------|------|-------|----|
| O39  | 1.0000 | 0.61550 | 0.05826 | 0.49445 | Biso | 1.000 | O  |
| P12  | 1.0000 | 0.81620 | 0.39268 | 0.51673 | Biso | 1.000 | P  |
| O40  | 1.0000 | 0.69727 | 0.29193 | 0.51019 | Biso | 1.000 | O  |
| O41  | 1.0000 | 0.58936 | 0.42643 | 0.86159 | Biso | 1.000 | O  |
| O42  | 1.0000 | 0.53962 | 0.21063 | 0.79547 | Biso | 1.000 | O  |
| AI13 | 1.0000 | 0.72305 | 0.51045 | 0.06131 | Biso | 1.000 | AI |
| O43  | 1.0000 | 0.91841 | 0.09433 | 0.53311 | Biso | 1.000 | O  |
| AI14 | 1.0000 | 0.81925 | 0.39807 | 0.72038 | Biso | 1.000 | AI |
| O44  | 1.0000 | 0.90289 | 0.35376 | 0.50271 | Biso | 1.000 | O  |
| P13  | 1.0000 | 0.59555 | 0.16657 | 0.73191 | Biso | 1.000 | P  |
| O45  | 1.0000 | 0.58289 | 0.05778 | 0.77141 | Biso | 1.000 | O  |
| AI15 | 1.0000 | 0.58181 | 0.16002 | 0.52773 | Biso | 1.000 | AI |
| O46  | 1.0000 | 0.94116 | 0.04325 | 0.74305 | Biso | 1.000 | O  |
| O47  | 1.0000 | 0.77379 | 0.46745 | 0.79122 | Biso | 1.000 | O  |
| P14  | 1.0000 | 0.48894 | 0.27564 | 0.06787 | Biso | 1.000 | P  |
| O48  | 1.0000 | 0.60551 | 0.37883 | 0.07824 | Biso | 1.000 | O  |
| O49  | 1.0000 | 0.72195 | 0.25246 | 0.72077 | Biso | 1.000 | O  |
| O50  | 1.0000 | 0.94703 | 0.41590 | 0.75821 | Biso | 1.000 | O  |
| O51  | 1.0000 | 0.53721 | 0.14300 | 0.63987 | Biso | 1.000 | O  |
| O52  | 1.0000 | 0.50474 | 0.77248 | 0.94713 | Biso | 1.000 | O  |
| O53  | 1.0000 | 0.77043 | 0.52549 | 0.94952 | Biso | 1.000 | O  |
| O54  | 1.0000 | 0.72507 | 0.75481 | 0.96678 | Biso | 1.000 | O  |
| P15  | 1.0000 | 0.38623 | 0.84279 | 0.18956 | Biso | 1.000 | P  |
| O55  | 1.0000 | 0.40917 | 0.96158 | 0.16933 | Biso | 1.000 | O  |
| AI16 | 1.0000 | 0.38306 | 0.84052 | 0.39675 | Biso | 1.000 | AI |
| P16  | 1.0000 | 0.48665 | 0.73178 | 0.84944 | Biso | 1.000 | P  |
| O56  | 1.0000 | 0.37018 | 0.62943 | 0.83593 | Biso | 1.000 | O  |
| O57  | 1.0000 | 0.25921 | 0.75959 | 0.17877 | Biso | 1.000 | O  |
| O58  | 1.0000 | 0.03531 | 0.96075 | 0.17427 | Biso | 1.000 | O  |
| O59  | 1.0000 | 0.19481 | 0.53098 | 0.13025 | Biso | 1.000 | O  |
| O60  | 1.0000 | 0.14069 | 0.51040 | 0.45756 | Biso | 1.000 | O  |
| O61  | 1.0000 | 0.03052 | 0.59487 | 0.14814 | Biso | 1.000 | O  |
| O62  | 1.0000 | 0.42408 | 0.83638 | 0.28564 | Biso | 1.000 | O  |
| O63  | 1.0000 | 0.14588 | 0.57802 | 0.30294 | Biso | 1.000 | O  |
| O64  | 1.0000 | 0.35385 | 0.94955 | 0.41433 | Biso | 1.000 | O  |
| P17  | 1.0000 | 0.15278 | 0.60997 | 0.40237 | Biso | 1.000 | P  |
| O65  | 1.0000 | 0.26780 | 0.71115 | 0.42446 | Biso | 1.000 | O  |
| O66  | 1.0000 | 0.38551 | 0.58673 | 0.06549 | Biso | 1.000 | O  |
| AI17 | 1.0000 | 0.25450 | 0.49806 | 0.85788 | Biso | 1.000 | AI |
| O67  | 1.0000 | 0.05157 | 0.90501 | 0.38659 | Biso | 1.000 | O  |
| O68  | 1.0000 | 0.45424 | 0.81545 | 0.12350 | Biso | 1.000 | O  |
| O69  | 1.0000 | 0.06103 | 0.63794 | 0.42781 | Biso | 1.000 | O  |
| AI18 | 1.0000 | 0.15773 | 0.61628 | 0.19005 | Biso | 1.000 | AI |
| O70  | 1.0000 | 0.23951 | 0.24317 | 0.94919 | Biso | 1.000 | O  |

|     |        |         |         |         |      |       |   |
|-----|--------|---------|---------|---------|------|-------|---|
| O71 | 1.0000 | 0.47065 | 0.22956 | 0.97148 | Biso | 1.000 | O |
| O72 | 1.0000 | 0.21062 | 0.48887 | 0.96961 | Biso | 1.000 | O |
| H1  | 1.0000 | 0.83380 | 0.68301 | 0.53734 | Biso | 1.000 | H |
| H2  | 1.0000 | 0.70470 | 0.61385 | 0.60657 | Biso | 1.000 | H |
| O73 | 1.0000 | 0.80464 | 0.67782 | 0.60078 | Biso | 1.000 | O |
| H3  | 1.0000 | 0.81580 | 0.75213 | 0.61485 | Biso | 1.000 | H |
| C1  | 1.0000 | 0.33248 | 0.41860 | 0.33060 | Biso | 1.000 | C |
| H4  | 1.0000 | 0.32362 | 0.35257 | 0.28571 | Biso | 1.000 | H |
| H5  | 1.0000 | 0.27769 | 0.38005 | 0.38767 | Biso | 1.000 | H |
| H6  | 1.0000 | 0.30532 | 0.47030 | 0.29574 | Biso | 1.000 | H |
| C2  | 1.0000 | 0.53145 | 0.54602 | 0.27696 | Biso | 1.000 | C |
| C3  | 1.0000 | 0.49345 | 0.41763 | 0.40378 | Biso | 1.000 | C |
| H7  | 1.0000 | 0.48785 | 0.34918 | 0.36419 | Biso | 1.000 | H |
| C4  | 1.0000 | 0.53236 | 0.43244 | 0.48773 | Biso | 1.000 | C |
| H8  | 1.0000 | 0.55802 | 0.37670 | 0.51584 | Biso | 1.000 | H |
| C5  | 1.0000 | 0.54073 | 0.52191 | 0.54288 | Biso | 1.000 | C |
| C6  | 1.0000 | 0.58799 | 0.54043 | 0.62750 | Biso | 1.000 | C |
| C7  | 1.0000 | 0.50590 | 0.59581 | 0.50482 | Biso | 1.000 | C |
| H9  | 1.0000 | 0.51116 | 0.66308 | 0.54559 | Biso | 1.000 | H |
| C8  | 1.0000 | 0.46723 | 0.58167 | 0.42075 | Biso | 1.000 | C |
| H10 | 1.0000 | 0.44206 | 0.63852 | 0.39351 | Biso | 1.000 | H |
| C9  | 1.0000 | 0.45681 | 0.49115 | 0.36026 | Biso | 1.000 | C |
| H11 | 1.0000 | 0.52278 | 0.48129 | 0.23069 | Biso | 1.000 | H |
| H12 | 1.0000 | 0.61933 | 0.59768 | 0.29541 | Biso | 1.000 | H |
| H13 | 1.0000 | 0.50508 | 0.59884 | 0.24313 | Biso | 1.000 | H |
| H14 | 1.0000 | 0.57422 | 0.59350 | 0.67292 | Biso | 1.000 | H |
| H15 | 1.0000 | 0.59524 | 0.47331 | 0.65855 | Biso | 1.000 | H |

TS3-4 in PX -based pathway

data\_image0

\_cell\_length\_a 13.8042  
 \_cell\_length\_b 13.8042  
 \_cell\_length\_c 15.044  
 \_cell\_angle\_alpha 90  
 \_cell\_angle\_beta 90  
 \_cell\_angle\_gamma 120

\_symmetry\_space\_group\_name\_H-M P 1

\_symmetry\_int\_tables\_number 1

loop\_

\_symmetry\_equiv\_pos\_as\_xyz  
 'x, y, z'

loop\_

\_atom\_site\_label  
 \_atom\_site\_occupancy  
 \_atom\_site\_fract\_x  
 \_atom\_site\_fract\_y  
 \_atom\_site\_fract\_z  
 \_atom\_site\_thermal\_displace\_type  
 \_atom\_site\_B\_iso\_or\_equiv  
 \_atom\_site\_type\_symbol

|     |        |         |         |         |      |       |    |
|-----|--------|---------|---------|---------|------|-------|----|
| P1  | 1.0000 | 0.04811 | 0.16974 | 0.52213 | Biso | 1.000 | P  |
| O1  | 1.0000 | 0.08274 | 0.29383 | 0.51134 | Biso | 1.000 | O  |
| O2  | 1.0000 | 0.28097 | 0.39059 | 0.85092 | Biso | 1.000 | O  |
| O3  | 1.0000 | 0.14216 | 0.48376 | 0.79671 | Biso | 1.000 | O  |
| Al1 | 1.0000 | 0.25425 | 0.26492 | 0.06345 | Biso | 1.000 | Al |
| O4  | 1.0000 | 0.17768 | 0.10944 | 0.28510 | Biso | 1.000 | O  |
| Al2 | 1.0000 | 0.05286 | 0.17245 | 0.72680 | Biso | 1.000 | Al |
| P2  | 1.0000 | 0.15631 | 0.06197 | 0.18949 | Biso | 1.000 | P  |
| Al3 | 1.0000 | 0.14997 | 0.05513 | 0.39560 | Biso | 1.000 | Al |
| O5  | 1.0000 | 0.08093 | 0.14996 | 0.61663 | Biso | 1.000 | O  |
| P3  | 1.0000 | 0.26151 | 0.27010 | 0.85481 | Biso | 1.000 | P  |
| O6  | 1.0000 | 0.36871 | 0.27237 | 0.82216 | Biso | 1.000 | O  |
| O7  | 1.0000 | 0.24959 | 0.03497 | 0.16264 | Biso | 1.000 | O  |
| O8  | 1.0000 | 0.48538 | 0.19016 | 0.13586 | Biso | 1.000 | O  |
| Al4 | 1.0000 | 0.05181 | 0.40090 | 0.52636 | Biso | 1.000 | Al |
| O9  | 1.0000 | 0.16495 | 0.19147 | 0.79343 | Biso | 1.000 | O  |
| P4  | 1.0000 | 0.25610 | 0.49888 | 0.07058 | Biso | 1.000 | P  |
| Al5 | 1.0000 | 0.38672 | 0.07198 | 0.19574 | Biso | 1.000 | Al |

|      |        |         |         |         |      |       |    |
|------|--------|---------|---------|---------|------|-------|----|
| O10  | 1.0000 | 0.23275 | 0.37834 | 0.08059 | Biso | 1.000 | O  |
| O11  | 1.0000 | 0.02952 | 0.28682 | 0.73362 | Biso | 1.000 | O  |
| O12  | 1.0000 | 0.41111 | 0.11145 | 0.30921 | Biso | 1.000 | O  |
| O13  | 1.0000 | 0.11267 | 0.14293 | 0.45304 | Biso | 1.000 | O  |
| O14  | 1.0000 | 0.08510 | 0.45639 | 0.63576 | Biso | 1.000 | O  |
| P5   | 1.0000 | 0.37220 | 0.05961 | 0.40307 | Biso | 1.000 | P  |
| O15  | 1.0000 | 0.28155 | 0.08267 | 0.43956 | Biso | 1.000 | O  |
| O16  | 1.0000 | 0.39245 | 0.30426 | 0.09619 | Biso | 1.000 | O  |
| P6   | 1.0000 | 0.05005 | 0.40779 | 0.73083 | Biso | 1.000 | P  |
| AI6  | 1.0000 | 0.49034 | 0.27823 | 0.86416 | Biso | 1.000 | AI |
| O17  | 1.0000 | 0.15782 | 0.15117 | 0.12628 | Biso | 1.000 | O  |
| AI7  | 1.0000 | 0.93152 | 0.60642 | 0.40257 | Biso | 1.000 | AI |
| P7   | 1.0000 | 0.72386 | 0.50825 | 0.85836 | Biso | 1.000 | P  |
| AI8  | 1.0000 | 0.58585 | 0.93236 | 0.73283 | Biso | 1.000 | AI |
| O18  | 1.0000 | 0.73606 | 0.62438 | 0.84285 | Biso | 1.000 | O  |
| O19  | 1.0000 | 0.95280 | 0.72437 | 0.16030 | Biso | 1.000 | O  |
| O20  | 1.0000 | 0.82178 | 0.82793 | 0.12131 | Biso | 1.000 | O  |
| O21  | 1.0000 | 0.55388 | 0.87656 | 0.62313 | Biso | 1.000 | O  |
| O22  | 1.0000 | 0.85569 | 0.86358 | 0.47027 | Biso | 1.000 | O  |
| O23  | 1.0000 | 0.91804 | 0.58671 | 0.28650 | Biso | 1.000 | O  |
| P8   | 1.0000 | 0.59166 | 0.93472 | 0.53080 | Biso | 1.000 | P  |
| O24  | 1.0000 | 0.68691 | 0.92020 | 0.49265 | Biso | 1.000 | O  |
| O25  | 1.0000 | 0.58083 | 0.70526 | 0.82445 | Biso | 1.000 | O  |
| O26  | 1.0000 | 0.81444 | 0.84848 | 0.79184 | Biso | 1.000 | O  |
| P9   | 1.0000 | 0.93145 | 0.60688 | 0.18537 | Biso | 1.000 | P  |
| AI9  | 1.0000 | 0.48631 | 0.72239 | 0.06940 | Biso | 1.000 | AI |
| Si1  | 1.0000 | 0.92045 | 0.82427 | 0.40226 | Biso | 1.000 | Si |
| O27  | 1.0000 | 0.90229 | 0.70555 | 0.44468 | Biso | 1.000 | O  |
| O28  | 1.0000 | 0.70436 | 0.62434 | 0.07151 | Biso | 1.000 | O  |
| O29  | 1.0000 | 0.49322 | 0.88163 | 0.46560 | Biso | 1.000 | O  |
| AI10 | 1.0000 | 0.71716 | 0.73990 | 0.85989 | Biso | 1.000 | AI |
| O30  | 1.0000 | 0.82148 | 0.92039 | 0.63959 | Biso | 1.000 | O  |
| O31  | 1.0000 | 0.82406 | 0.51541 | 0.13940 | Biso | 1.000 | O  |
| P10  | 1.0000 | 0.82274 | 0.94874 | 0.73910 | Biso | 1.000 | P  |
| AI11 | 1.0000 | 0.92000 | 0.82771 | 0.19701 | Biso | 1.000 | AI |
| AI12 | 1.0000 | 0.82321 | 0.95173 | 0.52386 | Biso | 1.000 | AI |
| O32  | 1.0000 | 0.86594 | 0.80117 | 0.30295 | Biso | 1.000 | O  |
| O33  | 1.0000 | 0.83348 | 0.47866 | 0.45253 | Biso | 1.000 | O  |
| O34  | 1.0000 | 0.49264 | 0.82839 | 0.80597 | Biso | 1.000 | O  |
| P11  | 1.0000 | 0.71988 | 0.74340 | 0.06807 | Biso | 1.000 | P  |
| O35  | 1.0000 | 0.61350 | 0.73781 | 0.10706 | Biso | 1.000 | O  |
| O36  | 1.0000 | 0.72427 | 0.96848 | 0.76144 | Biso | 1.000 | O  |
| O37  | 1.0000 | 0.80916 | 0.41894 | 0.61301 | Biso | 1.000 | O  |
| O38  | 1.0000 | 0.47336 | 0.11501 | 0.46601 | Biso | 1.000 | O  |



|      |        |         |         |         |      |       |    |
|------|--------|---------|---------|---------|------|-------|----|
| O39  | 1.0000 | 0.63398 | 0.06135 | 0.54327 | Biso | 1.000 | O  |
| P12  | 1.0000 | 0.81459 | 0.38362 | 0.51568 | Biso | 1.000 | P  |
| O40  | 1.0000 | 0.70132 | 0.28184 | 0.48917 | Biso | 1.000 | O  |
| O41  | 1.0000 | 0.59819 | 0.41865 | 0.84812 | Biso | 1.000 | O  |
| O42  | 1.0000 | 0.51155 | 0.18121 | 0.80479 | Biso | 1.000 | O  |
| AI13 | 1.0000 | 0.72614 | 0.50964 | 0.06286 | Biso | 1.000 | AI |
| O43  | 1.0000 | 0.91927 | 0.09722 | 0.50929 | Biso | 1.000 | O  |
| AI14 | 1.0000 | 0.81437 | 0.39282 | 0.72748 | Biso | 1.000 | AI |
| O44  | 1.0000 | 0.90818 | 0.35306 | 0.50666 | Biso | 1.000 | O  |
| P13  | 1.0000 | 0.58694 | 0.16744 | 0.73665 | Biso | 1.000 | P  |
| O45  | 1.0000 | 0.56715 | 0.04805 | 0.74586 | Biso | 1.000 | O  |
| AI15 | 1.0000 | 0.58944 | 0.16049 | 0.53404 | Biso | 1.000 | AI |
| O46  | 1.0000 | 0.93215 | 0.05398 | 0.76653 | Biso | 1.000 | O  |
| O47  | 1.0000 | 0.79359 | 0.49108 | 0.78671 | Biso | 1.000 | O  |
| P14  | 1.0000 | 0.48882 | 0.28097 | 0.07420 | Biso | 1.000 | P  |
| O48  | 1.0000 | 0.59988 | 0.38958 | 0.08951 | Biso | 1.000 | O  |
| O49  | 1.0000 | 0.71181 | 0.25351 | 0.75517 | Biso | 1.000 | O  |
| O50  | 1.0000 | 0.94245 | 0.40681 | 0.75939 | Biso | 1.000 | O  |
| O51  | 1.0000 | 0.55518 | 0.18709 | 0.64174 | Biso | 1.000 | O  |
| O52  | 1.0000 | 0.48667 | 0.74454 | 0.95426 | Biso | 1.000 | O  |
| O53  | 1.0000 | 0.76669 | 0.50131 | 0.95199 | Biso | 1.000 | O  |
| O54  | 1.0000 | 0.73614 | 0.78466 | 0.97041 | Biso | 1.000 | O  |
| P15  | 1.0000 | 0.38840 | 0.84080 | 0.18777 | Biso | 1.000 | P  |
| O55  | 1.0000 | 0.41107 | 0.96078 | 0.17396 | Biso | 1.000 | O  |
| AI16 | 1.0000 | 0.37781 | 0.83725 | 0.39579 | Biso | 1.000 | AI |
| P16  | 1.0000 | 0.48373 | 0.72513 | 0.85327 | Biso | 1.000 | P  |
| O56  | 1.0000 | 0.37331 | 0.62206 | 0.82409 | Biso | 1.000 | O  |
| O57  | 1.0000 | 0.26441 | 0.75595 | 0.16475 | Biso | 1.000 | O  |
| O58  | 1.0000 | 0.04224 | 0.95641 | 0.17987 | Biso | 1.000 | O  |
| O59  | 1.0000 | 0.18156 | 0.51569 | 0.13743 | Biso | 1.000 | O  |
| O60  | 1.0000 | 0.14153 | 0.50225 | 0.45053 | Biso | 1.000 | O  |
| O61  | 1.0000 | 0.03032 | 0.59475 | 0.15086 | Biso | 1.000 | O  |
| O62  | 1.0000 | 0.41437 | 0.82365 | 0.28530 | Biso | 1.000 | O  |
| O63  | 1.0000 | 0.15989 | 0.59490 | 0.30434 | Biso | 1.000 | O  |
| O64  | 1.0000 | 0.32627 | 0.93137 | 0.39787 | Biso | 1.000 | O  |
| P17  | 1.0000 | 0.16023 | 0.61073 | 0.40586 | Biso | 1.000 | P  |
| O65  | 1.0000 | 0.27560 | 0.70641 | 0.43666 | Biso | 1.000 | O  |
| O66  | 1.0000 | 0.38134 | 0.58212 | 0.09134 | Biso | 1.000 | O  |
| AI17 | 1.0000 | 0.25392 | 0.50180 | 0.86295 | Biso | 1.000 | AI |
| O67  | 1.0000 | 0.05461 | 0.91430 | 0.39842 | Biso | 1.000 | O  |
| O68  | 1.0000 | 0.46673 | 0.82314 | 0.12521 | Biso | 1.000 | O  |
| O69  | 1.0000 | 0.06853 | 0.63763 | 0.43405 | Biso | 1.000 | O  |
| AI18 | 1.0000 | 0.15918 | 0.61675 | 0.18952 | Biso | 1.000 | AI |
| O70  | 1.0000 | 0.23343 | 0.22432 | 0.95070 | Biso | 1.000 | O  |

|     |        |         |         |         |      |       |   |
|-----|--------|---------|---------|---------|------|-------|---|
| O71 | 1.0000 | 0.47877 | 0.24053 | 0.97677 | Biso | 1.000 | O |
| O72 | 1.0000 | 0.22713 | 0.51871 | 0.97500 | Biso | 1.000 | O |
| H1  | 1.0000 | 0.86387 | 0.69576 | 0.55119 | Biso | 1.000 | H |
| C1  | 1.0000 | 0.67622 | 0.59772 | 0.61974 | Biso | 1.000 | C |
| O73 | 1.0000 | 0.84234 | 0.69142 | 0.61555 | Biso | 1.000 | O |
| H2  | 1.0000 | 0.68110 | 0.60012 | 0.69080 | Biso | 1.000 | H |
| H3  | 1.0000 | 0.67845 | 0.53117 | 0.58425 | Biso | 1.000 | H |
| H4  | 1.0000 | 0.66274 | 0.65729 | 0.58370 | Biso | 1.000 | H |
| H5  | 1.0000 | 0.85679 | 0.76644 | 0.62946 | Biso | 1.000 | H |
| C2  | 1.0000 | 0.34935 | 0.42844 | 0.30395 | Biso | 1.000 | C |
| H6  | 1.0000 | 0.35458 | 0.36949 | 0.25877 | Biso | 1.000 | H |
| H7  | 1.0000 | 0.27325 | 0.38393 | 0.34365 | Biso | 1.000 | H |
| H8  | 1.0000 | 0.34463 | 0.49233 | 0.26468 | Biso | 1.000 | H |
| C3  | 1.0000 | 0.56155 | 0.54599 | 0.30567 | Biso | 1.000 | C |
| C4  | 1.0000 | 0.46010 | 0.39428 | 0.41635 | Biso | 1.000 | C |
| H9  | 1.0000 | 0.46146 | 0.32850 | 0.37769 | Biso | 1.000 | H |
| C5  | 1.0000 | 0.46345 | 0.39241 | 0.50567 | Biso | 1.000 | C |
| H10 | 1.0000 | 0.46682 | 0.32522 | 0.54041 | Biso | 1.000 | H |
| C6  | 1.0000 | 0.46457 | 0.48082 | 0.55869 | Biso | 1.000 | C |
| C7  | 1.0000 | 0.48782 | 0.48941 | 0.64841 | Biso | 1.000 | C |
| C8  | 1.0000 | 0.45013 | 0.56505 | 0.51250 | Biso | 1.000 | C |
| H11 | 1.0000 | 0.44429 | 0.62786 | 0.55195 | Biso | 1.000 | H |
| C9  | 1.0000 | 0.44702 | 0.56726 | 0.42324 | Biso | 1.000 | C |
| H12 | 1.0000 | 0.43860 | 0.63235 | 0.38975 | Biso | 1.000 | H |
| C10 | 1.0000 | 0.45466 | 0.48392 | 0.36436 | Biso | 1.000 | C |
| H13 | 1.0000 | 0.56690 | 0.48712 | 0.26014 | Biso | 1.000 | H |
| H14 | 1.0000 | 0.63688 | 0.58534 | 0.34669 | Biso | 1.000 | H |
| H15 | 1.0000 | 0.55879 | 0.61109 | 0.26644 | Biso | 1.000 | H |
| H16 | 1.0000 | 0.48074 | 0.55032 | 0.68902 | Biso | 1.000 | H |
| H17 | 1.0000 | 0.49104 | 0.42235 | 0.68295 | Biso | 1.000 | H |

TS4-5 in PX -based pathway

data\_image0

\_cell\_length\_a 13.8042  
 \_cell\_length\_b 13.8042  
 \_cell\_length\_c 15.044  
 \_cell\_angle\_alpha 90  
 \_cell\_angle\_beta 90  
 \_cell\_angle\_gamma 120

\_symmetry\_space\_group\_name\_H-M P 1

\_symmetry\_int\_tables\_number 1

loop\_

\_symmetry\_equiv\_pos\_as\_xyz  
 'x, y, z'

loop\_

\_atom\_site\_label  
 \_atom\_site\_occupancy  
 \_atom\_site\_fract\_x  
 \_atom\_site\_fract\_y  
 \_atom\_site\_fract\_z  
 \_atom\_site\_thermal\_displace\_type  
 \_atom\_site\_B\_iso\_or\_equiv  
 \_atom\_site\_type\_symbol

|     |        |         |         |         |      |       |    |
|-----|--------|---------|---------|---------|------|-------|----|
| P1  | 1.0000 | 0.05918 | 0.18358 | 0.51539 | Biso | 1.000 | P  |
| O1  | 1.0000 | 0.09103 | 0.30597 | 0.49750 | Biso | 1.000 | O  |
| O2  | 1.0000 | 0.28946 | 0.40135 | 0.83721 | Biso | 1.000 | O  |
| O3  | 1.0000 | 0.15021 | 0.49283 | 0.78671 | Biso | 1.000 | O  |
| Al1 | 1.0000 | 0.26637 | 0.27997 | 0.05953 | Biso | 1.000 | Al |
| O4  | 1.0000 | 0.17699 | 0.11045 | 0.27717 | Biso | 1.000 | O  |
| Al2 | 1.0000 | 0.06446 | 0.17985 | 0.71865 | Biso | 1.000 | Al |
| P2  | 1.0000 | 0.16561 | 0.07204 | 0.17950 | Biso | 1.000 | P  |
| Al3 | 1.0000 | 0.15439 | 0.06169 | 0.38882 | Biso | 1.000 | Al |
| O5  | 1.0000 | 0.10428 | 0.17391 | 0.60793 | Biso | 1.000 | O  |
| P3  | 1.0000 | 0.26973 | 0.28129 | 0.84899 | Biso | 1.000 | P  |
| O6  | 1.0000 | 0.37764 | 0.28210 | 0.82100 | Biso | 1.000 | O  |
| O7  | 1.0000 | 0.26443 | 0.05312 | 0.15394 | Biso | 1.000 | O  |
| O8  | 1.0000 | 0.50168 | 0.20747 | 0.13411 | Biso | 1.000 | O  |
| Al4 | 1.0000 | 0.05436 | 0.40827 | 0.51817 | Biso | 1.000 | Al |
| O9  | 1.0000 | 0.17330 | 0.19758 | 0.78927 | Biso | 1.000 | O  |
| P4  | 1.0000 | 0.26777 | 0.51149 | 0.06158 | Biso | 1.000 | P  |
| Al5 | 1.0000 | 0.39963 | 0.08690 | 0.18976 | Biso | 1.000 | Al |

|      |        |         |         |         |      |       |    |
|------|--------|---------|---------|---------|------|-------|----|
| O10  | 1.0000 | 0.24929 | 0.39484 | 0.08412 | Biso | 1.000 | O  |
| O11  | 1.0000 | 0.03750 | 0.29139 | 0.73161 | Biso | 1.000 | O  |
| O12  | 1.0000 | 0.42136 | 0.12650 | 0.30310 | Biso | 1.000 | O  |
| O13  | 1.0000 | 0.11317 | 0.14842 | 0.44308 | Biso | 1.000 | O  |
| O14  | 1.0000 | 0.08352 | 0.45581 | 0.62937 | Biso | 1.000 | O  |
| P5   | 1.0000 | 0.37940 | 0.07408 | 0.39633 | Biso | 1.000 | P  |
| O15  | 1.0000 | 0.28925 | 0.09890 | 0.43106 | Biso | 1.000 | O  |
| O16  | 1.0000 | 0.40508 | 0.31655 | 0.08896 | Biso | 1.000 | O  |
| P6   | 1.0000 | 0.05462 | 0.41099 | 0.72570 | Biso | 1.000 | P  |
| Al6  | 1.0000 | 0.49599 | 0.27986 | 0.86169 | Biso | 1.000 | Al |
| O17  | 1.0000 | 0.16810 | 0.16525 | 0.12078 | Biso | 1.000 | O  |
| Al7  | 1.0000 | 0.93781 | 0.62114 | 0.39795 | Biso | 1.000 | Al |
| P7   | 1.0000 | 0.73425 | 0.51657 | 0.85382 | Biso | 1.000 | P  |
| Al8  | 1.0000 | 0.59638 | 0.94308 | 0.72013 | Biso | 1.000 | Al |
| O18  | 1.0000 | 0.73071 | 0.62359 | 0.83054 | Biso | 1.000 | O  |
| O19  | 1.0000 | 0.96240 | 0.73000 | 0.14910 | Biso | 1.000 | O  |
| O20  | 1.0000 | 0.83155 | 0.83598 | 0.11156 | Biso | 1.000 | O  |
| O21  | 1.0000 | 0.56729 | 0.89290 | 0.60915 | Biso | 1.000 | O  |
| O22  | 1.0000 | 0.86160 | 0.88187 | 0.45170 | Biso | 1.000 | O  |
| O23  | 1.0000 | 0.92148 | 0.59930 | 0.28195 | Biso | 1.000 | O  |
| P8   | 1.0000 | 0.60370 | 0.95554 | 0.51868 | Biso | 1.000 | P  |
| O24  | 1.0000 | 0.69921 | 0.94373 | 0.47756 | Biso | 1.000 | O  |
| O25  | 1.0000 | 0.58301 | 0.71105 | 0.82073 | Biso | 1.000 | O  |
| O26  | 1.0000 | 0.81685 | 0.85115 | 0.77953 | Biso | 1.000 | O  |
| P9   | 1.0000 | 0.93654 | 0.61266 | 0.18035 | Biso | 1.000 | P  |
| Al9  | 1.0000 | 0.49762 | 0.74099 | 0.05589 | Biso | 1.000 | Al |
| Si1  | 1.0000 | 0.92812 | 0.83547 | 0.39340 | Biso | 1.000 | Si |
| O27  | 1.0000 | 0.89878 | 0.71423 | 0.43995 | Biso | 1.000 | O  |
| O28  | 1.0000 | 0.70698 | 0.63201 | 0.06582 | Biso | 1.000 | O  |
| O29  | 1.0000 | 0.50436 | 0.90435 | 0.45442 | Biso | 1.000 | O  |
| Al10 | 1.0000 | 0.72076 | 0.74359 | 0.84935 | Biso | 1.000 | Al |
| O30  | 1.0000 | 0.81790 | 0.91523 | 0.62564 | Biso | 1.000 | O  |
| O31  | 1.0000 | 0.82723 | 0.52157 | 0.13595 | Biso | 1.000 | O  |
| P10  | 1.0000 | 0.82823 | 0.95107 | 0.72471 | Biso | 1.000 | P  |
| Al11 | 1.0000 | 0.93318 | 0.83674 | 0.18401 | Biso | 1.000 | Al |
| Al12 | 1.0000 | 0.83060 | 0.96525 | 0.51328 | Biso | 1.000 | Al |
| O32  | 1.0000 | 0.88378 | 0.81327 | 0.29116 | Biso | 1.000 | O  |
| O33  | 1.0000 | 0.84687 | 0.49342 | 0.44998 | Biso | 1.000 | O  |
| O34  | 1.0000 | 0.49807 | 0.83364 | 0.78624 | Biso | 1.000 | O  |
| P11  | 1.0000 | 0.72922 | 0.75344 | 0.05767 | Biso | 1.000 | P  |
| O35  | 1.0000 | 0.62489 | 0.75554 | 0.09309 | Biso | 1.000 | O  |
| O36  | 1.0000 | 0.73519 | 0.97871 | 0.74866 | Biso | 1.000 | O  |
| O37  | 1.0000 | 0.82124 | 0.42880 | 0.60910 | Biso | 1.000 | O  |
| O38  | 1.0000 | 0.47875 | 0.12816 | 0.46081 | Biso | 1.000 | O  |

|      |        |         |         |         |      |       |    |
|------|--------|---------|---------|---------|------|-------|----|
| O39  | 1.0000 | 0.64556 | 0.08122 | 0.53498 | Biso | 1.000 | O  |
| P12  | 1.0000 | 0.82214 | 0.39494 | 0.51073 | Biso | 1.000 | P  |
| O40  | 1.0000 | 0.70497 | 0.29958 | 0.48392 | Biso | 1.000 | O  |
| O41  | 1.0000 | 0.61285 | 0.41639 | 0.85630 | Biso | 1.000 | O  |
| O42  | 1.0000 | 0.51305 | 0.18274 | 0.79874 | Biso | 1.000 | O  |
| AI13 | 1.0000 | 0.73701 | 0.52239 | 0.05422 | Biso | 1.000 | AI |
| O43  | 1.0000 | 0.92936 | 0.11069 | 0.51417 | Biso | 1.000 | O  |
| AI14 | 1.0000 | 0.82183 | 0.39974 | 0.72330 | Biso | 1.000 | AI |
| O44  | 1.0000 | 0.90991 | 0.35685 | 0.49796 | Biso | 1.000 | O  |
| P13  | 1.0000 | 0.59136 | 0.17463 | 0.73022 | Biso | 1.000 | P  |
| O45  | 1.0000 | 0.57548 | 0.05654 | 0.73670 | Biso | 1.000 | O  |
| AI15 | 1.0000 | 0.59549 | 0.17604 | 0.52798 | Biso | 1.000 | AI |
| O46  | 1.0000 | 0.94263 | 0.05365 | 0.74564 | Biso | 1.000 | O  |
| O47  | 1.0000 | 0.80296 | 0.49969 | 0.78115 | Biso | 1.000 | O  |
| P14  | 1.0000 | 0.49791 | 0.28834 | 0.06528 | Biso | 1.000 | P  |
| O48  | 1.0000 | 0.61085 | 0.39702 | 0.06631 | Biso | 1.000 | O  |
| O49  | 1.0000 | 0.71527 | 0.26215 | 0.75002 | Biso | 1.000 | O  |
| O50  | 1.0000 | 0.94672 | 0.40746 | 0.75725 | Biso | 1.000 | O  |
| O51  | 1.0000 | 0.55894 | 0.19647 | 0.63640 | Biso | 1.000 | O  |
| O52  | 1.0000 | 0.50718 | 0.78224 | 0.94376 | Biso | 1.000 | O  |
| O53  | 1.0000 | 0.79084 | 0.52927 | 0.94549 | Biso | 1.000 | O  |
| O54  | 1.0000 | 0.74995 | 0.79140 | 0.95919 | Biso | 1.000 | O  |
| P15  | 1.0000 | 0.39251 | 0.85231 | 0.18265 | Biso | 1.000 | P  |
| O55  | 1.0000 | 0.42228 | 0.97450 | 0.16740 | Biso | 1.000 | O  |
| AI16 | 1.0000 | 0.38379 | 0.85168 | 0.38984 | Biso | 1.000 | AI |
| P16  | 1.0000 | 0.49157 | 0.74049 | 0.84658 | Biso | 1.000 | P  |
| O56  | 1.0000 | 0.37678 | 0.63616 | 0.83178 | Biso | 1.000 | O  |
| O57  | 1.0000 | 0.26626 | 0.77289 | 0.16229 | Biso | 1.000 | O  |
| O58  | 1.0000 | 0.05533 | 0.96426 | 0.16167 | Biso | 1.000 | O  |
| O59  | 1.0000 | 0.20706 | 0.54171 | 0.13227 | Biso | 1.000 | O  |
| O60  | 1.0000 | 0.14365 | 0.51869 | 0.44877 | Biso | 1.000 | O  |
| O61  | 1.0000 | 0.03316 | 0.59394 | 0.14981 | Biso | 1.000 | O  |
| O62  | 1.0000 | 0.41914 | 0.83514 | 0.27985 | Biso | 1.000 | O  |
| O63  | 1.0000 | 0.16999 | 0.60829 | 0.30040 | Biso | 1.000 | O  |
| O64  | 1.0000 | 0.33160 | 0.94557 | 0.39047 | Biso | 1.000 | O  |
| P17  | 1.0000 | 0.16739 | 0.62717 | 0.40136 | Biso | 1.000 | P  |
| O65  | 1.0000 | 0.28312 | 0.72161 | 0.43321 | Biso | 1.000 | O  |
| O66  | 1.0000 | 0.39551 | 0.59692 | 0.06333 | Biso | 1.000 | O  |
| AI17 | 1.0000 | 0.25792 | 0.50858 | 0.85685 | Biso | 1.000 | AI |
| O67  | 1.0000 | 0.06355 | 0.91987 | 0.39706 | Biso | 1.000 | O  |
| O68  | 1.0000 | 0.46557 | 0.82670 | 0.12055 | Biso | 1.000 | O  |
| O69  | 1.0000 | 0.07805 | 0.65944 | 0.42482 | Biso | 1.000 | O  |
| AI18 | 1.0000 | 0.16805 | 0.63010 | 0.18548 | Biso | 1.000 | AI |
| O70  | 1.0000 | 0.23957 | 0.24292 | 0.94643 | Biso | 1.000 | O  |

|     |        |         |         |         |      |       |   |
|-----|--------|---------|---------|---------|------|-------|---|
| O71 | 1.0000 | 0.47430 | 0.23221 | 0.97244 | Biso | 1.000 | O |
| O72 | 1.0000 | 0.21883 | 0.51054 | 0.96850 | Biso | 1.000 | O |
| H1  | 1.0000 | 0.82511 | 0.68705 | 0.53170 | Biso | 1.000 | H |
| C1  | 1.0000 | 0.53692 | 0.48040 | 0.67502 | Biso | 1.000 | C |
| O73 | 1.0000 | 0.79006 | 0.68043 | 0.59276 | Biso | 1.000 | O |
| H2  | 1.0000 | 0.53832 | 0.50929 | 0.74219 | Biso | 1.000 | H |
| H3  | 1.0000 | 0.45275 | 0.41049 | 0.66253 | Biso | 1.000 | H |
| H4  | 1.0000 | 0.59411 | 0.44737 | 0.67187 | Biso | 1.000 | H |
| H5  | 1.0000 | 0.81209 | 0.75717 | 0.60998 | Biso | 1.000 | H |
| C2  | 1.0000 | 0.57124 | 0.53433 | 0.25494 | Biso | 1.000 | C |
| H6  | 1.0000 | 0.56478 | 0.58899 | 0.20617 | Biso | 1.000 | H |
| H7  | 1.0000 | 0.65665 | 0.57542 | 0.28073 | Biso | 1.000 | H |
| H8  | 1.0000 | 0.55343 | 0.45682 | 0.22220 | Biso | 1.000 | H |
| C3  | 1.0000 | 0.36580 | 0.45670 | 0.29403 | Biso | 1.000 | C |
| C4  | 1.0000 | 0.51582 | 0.61752 | 0.37583 | Biso | 1.000 | C |
| H9  | 1.0000 | 0.51534 | 0.68170 | 0.33423 | Biso | 1.000 | H |
| C5  | 1.0000 | 0.54109 | 0.63704 | 0.46269 | Biso | 1.000 | C |
| H10 | 1.0000 | 0.56044 | 0.71604 | 0.49247 | Biso | 1.000 | H |
| C6  | 1.0000 | 0.54034 | 0.55252 | 0.51969 | Biso | 1.000 | C |
| C7  | 1.0000 | 0.56701 | 0.57451 | 0.60957 | Biso | 1.000 | C |
| C8  | 1.0000 | 0.51636 | 0.44731 | 0.48008 | Biso | 1.000 | C |
| H11 | 1.0000 | 0.51748 | 0.38385 | 0.52162 | Biso | 1.000 | H |
| C9  | 1.0000 | 0.49141 | 0.42736 | 0.39311 | Biso | 1.000 | C |
| H12 | 1.0000 | 0.47267 | 0.34769 | 0.36429 | Biso | 1.000 | H |
| C10 | 1.0000 | 0.48671 | 0.50951 | 0.33152 | Biso | 1.000 | C |
| H13 | 1.0000 | 0.36075 | 0.51410 | 0.24710 | Biso | 1.000 | H |
| H14 | 1.0000 | 0.30560 | 0.43918 | 0.34742 | Biso | 1.000 | H |
| H15 | 1.0000 | 0.34325 | 0.37862 | 0.25975 | Biso | 1.000 | H |
| H16 | 1.0000 | 0.68733 | 0.62926 | 0.59316 | Biso | 1.000 | H |
| H17 | 1.0000 | 0.56630 | 0.64787 | 0.63563 | Biso | 1.000 | H |

TS5-6 in PX -based pathway

data\_image0

\_cell\_length\_a 13.8042  
 \_cell\_length\_b 13.8042  
 \_cell\_length\_c 15.044  
 \_cell\_angle\_alpha 90  
 \_cell\_angle\_beta 90  
 \_cell\_angle\_gamma 120

\_symmetry\_space\_group\_name\_H-M P 1

\_symmetry\_int\_tables\_number 1

loop\_

\_symmetry\_equiv\_pos\_as\_xyz  
 'x, y, z'

loop\_

\_atom\_site\_label  
 \_atom\_site\_occupancy  
 \_atom\_site\_fract\_x  
 \_atom\_site\_fract\_y  
 \_atom\_site\_fract\_z  
 \_atom\_site\_thermal\_displace\_type  
 \_atom\_site\_B\_iso\_or\_equiv  
 \_atom\_site\_type\_symbol

|     |        |         |         |         |      |       |    |
|-----|--------|---------|---------|---------|------|-------|----|
| P1  | 1.0000 | 0.06484 | 0.19333 | 0.52722 | Biso | 1.000 | P  |
| O1  | 1.0000 | 0.10406 | 0.31928 | 0.52190 | Biso | 1.000 | O  |
| O2  | 1.0000 | 0.31234 | 0.41620 | 0.87162 | Biso | 1.000 | O  |
| O3  | 1.0000 | 0.14049 | 0.46221 | 0.80843 | Biso | 1.000 | O  |
| Al1 | 1.0000 | 0.25560 | 0.28242 | 0.06423 | Biso | 1.000 | Al |
| O4  | 1.0000 | 0.18616 | 0.12813 | 0.29110 | Biso | 1.000 | O  |
| Al2 | 1.0000 | 0.05206 | 0.18624 | 0.73111 | Biso | 1.000 | Al |
| P2  | 1.0000 | 0.15580 | 0.08326 | 0.19506 | Biso | 1.000 | P  |
| Al3 | 1.0000 | 0.15922 | 0.07405 | 0.40140 | Biso | 1.000 | Al |
| O5  | 1.0000 | 0.08504 | 0.16297 | 0.62262 | Biso | 1.000 | O  |
| P3  | 1.0000 | 0.26567 | 0.28766 | 0.86457 | Biso | 1.000 | P  |
| O6  | 1.0000 | 0.36216 | 0.26694 | 0.83944 | Biso | 1.000 | O  |
| O7  | 1.0000 | 0.24150 | 0.04912 | 0.16118 | Biso | 1.000 | O  |
| O8  | 1.0000 | 0.47945 | 0.20931 | 0.14698 | Biso | 1.000 | O  |
| Al4 | 1.0000 | 0.07250 | 0.42649 | 0.53577 | Biso | 1.000 | Al |
| O9  | 1.0000 | 0.17623 | 0.23713 | 0.79153 | Biso | 1.000 | O  |
| P4  | 1.0000 | 0.26152 | 0.51873 | 0.07259 | Biso | 1.000 | P  |
| Al5 | 1.0000 | 0.37747 | 0.08061 | 0.19308 | Biso | 1.000 | Al |

|      |        |         |         |         |      |       |    |
|------|--------|---------|---------|---------|------|-------|----|
| O10  | 1.0000 | 0.24076 | 0.39937 | 0.08255 | Biso | 1.000 | O  |
| O11  | 1.0000 | 0.00453 | 0.28447 | 0.72717 | Biso | 1.000 | O  |
| O12  | 1.0000 | 0.39762 | 0.09795 | 0.30849 | Biso | 1.000 | O  |
| O13  | 1.0000 | 0.13494 | 0.16978 | 0.46125 | Biso | 1.000 | O  |
| O14  | 1.0000 | 0.09508 | 0.47238 | 0.64816 | Biso | 1.000 | O  |
| P5   | 1.0000 | 0.38515 | 0.08234 | 0.41015 | Biso | 1.000 | P  |
| O15  | 1.0000 | 0.28831 | 0.09603 | 0.44522 | Biso | 1.000 | O  |
| O16  | 1.0000 | 0.39850 | 0.32272 | 0.07888 | Biso | 1.000 | O  |
| P6   | 1.0000 | 0.04789 | 0.41175 | 0.73796 | Biso | 1.000 | P  |
| AI6  | 1.0000 | 0.49187 | 0.28130 | 0.87017 | Biso | 1.000 | AI |
| O17  | 1.0000 | 0.16327 | 0.17878 | 0.13655 | Biso | 1.000 | O  |
| AI7  | 1.0000 | 0.93648 | 0.62366 | 0.40724 | Biso | 1.000 | AI |
| P7   | 1.0000 | 0.72176 | 0.51914 | 0.86101 | Biso | 1.000 | P  |
| AI8  | 1.0000 | 0.59721 | 0.95060 | 0.73187 | Biso | 1.000 | AI |
| O18  | 1.0000 | 0.72471 | 0.62988 | 0.83889 | Biso | 1.000 | O  |
| O19  | 1.0000 | 0.96502 | 0.75101 | 0.16744 | Biso | 1.000 | O  |
| O20  | 1.0000 | 0.82186 | 0.83789 | 0.12422 | Biso | 1.000 | O  |
| O21  | 1.0000 | 0.57670 | 0.89616 | 0.62220 | Biso | 1.000 | O  |
| O22  | 1.0000 | 0.86108 | 0.88188 | 0.47745 | Biso | 1.000 | O  |
| O23  | 1.0000 | 0.91958 | 0.60742 | 0.29087 | Biso | 1.000 | O  |
| P8   | 1.0000 | 0.59724 | 0.94666 | 0.52686 | Biso | 1.000 | P  |
| O24  | 1.0000 | 0.70756 | 0.96280 | 0.48879 | Biso | 1.000 | O  |
| O25  | 1.0000 | 0.57894 | 0.71792 | 0.83091 | Biso | 1.000 | O  |
| O26  | 1.0000 | 0.81084 | 0.85425 | 0.78303 | Biso | 1.000 | O  |
| P9   | 1.0000 | 0.93700 | 0.63049 | 0.19016 | Biso | 1.000 | P  |
| AI9  | 1.0000 | 0.48712 | 0.74267 | 0.06700 | Biso | 1.000 | AI |
| Si1  | 1.0000 | 0.92516 | 0.84262 | 0.40817 | Biso | 1.000 | Si |
| O27  | 1.0000 | 0.90964 | 0.72448 | 0.45062 | Biso | 1.000 | O  |
| O28  | 1.0000 | 0.69617 | 0.63676 | 0.06980 | Biso | 1.000 | O  |
| O29  | 1.0000 | 0.50124 | 0.86429 | 0.46603 | Biso | 1.000 | O  |
| AI10 | 1.0000 | 0.71752 | 0.75172 | 0.85843 | Biso | 1.000 | AI |
| O30  | 1.0000 | 0.83197 | 0.95531 | 0.64083 | Biso | 1.000 | O  |
| O31  | 1.0000 | 0.82871 | 0.54367 | 0.14208 | Biso | 1.000 | O  |
| P10  | 1.0000 | 0.82944 | 0.96587 | 0.74242 | Biso | 1.000 | P  |
| AI11 | 1.0000 | 0.92238 | 0.84796 | 0.20265 | Biso | 1.000 | AI |
| AI12 | 1.0000 | 0.83730 | 0.98062 | 0.52410 | Biso | 1.000 | AI |
| O32  | 1.0000 | 0.86919 | 0.81910 | 0.30919 | Biso | 1.000 | O  |
| O33  | 1.0000 | 0.84029 | 0.49341 | 0.45597 | Biso | 1.000 | O  |
| O34  | 1.0000 | 0.49720 | 0.84445 | 0.80027 | Biso | 1.000 | O  |
| P11  | 1.0000 | 0.72322 | 0.76009 | 0.06511 | Biso | 1.000 | P  |
| O35  | 1.0000 | 0.61880 | 0.76409 | 0.09687 | Biso | 1.000 | O  |
| O36  | 1.0000 | 0.73358 | 0.98793 | 0.77024 | Biso | 1.000 | O  |
| O37  | 1.0000 | 0.82639 | 0.43752 | 0.61643 | Biso | 1.000 | O  |
| O38  | 1.0000 | 0.49444 | 0.17463 | 0.45356 | Biso | 1.000 | O  |



|      |        |         |         |         |      |       |    |
|------|--------|---------|---------|---------|------|-------|----|
| O39  | 1.0000 | 0.60188 | 0.06035 | 0.53060 | Biso | 1.000 | O  |
| P12  | 1.0000 | 0.83213 | 0.40214 | 0.51925 | Biso | 1.000 | P  |
| O40  | 1.0000 | 0.72498 | 0.29246 | 0.49541 | Biso | 1.000 | O  |
| O41  | 1.0000 | 0.59780 | 0.42348 | 0.85951 | Biso | 1.000 | O  |
| O42  | 1.0000 | 0.51500 | 0.19312 | 0.80051 | Biso | 1.000 | O  |
| AI13 | 1.0000 | 0.72792 | 0.52773 | 0.06399 | Biso | 1.000 | AI |
| O43  | 1.0000 | 0.93794 | 0.12401 | 0.50507 | Biso | 1.000 | O  |
| AI14 | 1.0000 | 0.82168 | 0.40896 | 0.73135 | Biso | 1.000 | AI |
| O44  | 1.0000 | 0.93218 | 0.38209 | 0.50740 | Biso | 1.000 | O  |
| P13  | 1.0000 | 0.59310 | 0.18357 | 0.73244 | Biso | 1.000 | P  |
| O45  | 1.0000 | 0.57424 | 0.06414 | 0.73747 | Biso | 1.000 | O  |
| AI15 | 1.0000 | 0.59492 | 0.18325 | 0.52912 | Biso | 1.000 | AI |
| O46  | 1.0000 | 0.94236 | 0.06182 | 0.77736 | Biso | 1.000 | O  |
| O47  | 1.0000 | 0.79047 | 0.50064 | 0.78926 | Biso | 1.000 | O  |
| P14  | 1.0000 | 0.49285 | 0.29274 | 0.07324 | Biso | 1.000 | P  |
| O48  | 1.0000 | 0.60595 | 0.40019 | 0.08677 | Biso | 1.000 | O  |
| O49  | 1.0000 | 0.71756 | 0.26833 | 0.75366 | Biso | 1.000 | O  |
| O50  | 1.0000 | 0.95068 | 0.42823 | 0.76957 | Biso | 1.000 | O  |
| O51  | 1.0000 | 0.56302 | 0.20765 | 0.63843 | Biso | 1.000 | O  |
| O52  | 1.0000 | 0.47941 | 0.76408 | 0.95230 | Biso | 1.000 | O  |
| O53  | 1.0000 | 0.77365 | 0.52548 | 0.95372 | Biso | 1.000 | O  |
| O54  | 1.0000 | 0.75146 | 0.80260 | 0.96756 | Biso | 1.000 | O  |
| P15  | 1.0000 | 0.39096 | 0.86261 | 0.19024 | Biso | 1.000 | P  |
| O55  | 1.0000 | 0.39581 | 0.97010 | 0.15539 | Biso | 1.000 | O  |
| AI16 | 1.0000 | 0.39628 | 0.86206 | 0.39824 | Biso | 1.000 | AI |
| P16  | 1.0000 | 0.48242 | 0.74163 | 0.85215 | Biso | 1.000 | P  |
| O56  | 1.0000 | 0.37149 | 0.63891 | 0.82154 | Biso | 1.000 | O  |
| O57  | 1.0000 | 0.26790 | 0.76555 | 0.19036 | Biso | 1.000 | O  |
| O58  | 1.0000 | 0.03684 | 0.98385 | 0.18740 | Biso | 1.000 | O  |
| O59  | 1.0000 | 0.18363 | 0.53237 | 0.13781 | Biso | 1.000 | O  |
| O60  | 1.0000 | 0.16602 | 0.53694 | 0.46782 | Biso | 1.000 | O  |
| O61  | 1.0000 | 0.03403 | 0.61448 | 0.15654 | Biso | 1.000 | O  |
| O62  | 1.0000 | 0.43988 | 0.88182 | 0.28577 | Biso | 1.000 | O  |
| O63  | 1.0000 | 0.13973 | 0.57839 | 0.30979 | Biso | 1.000 | O  |
| O64  | 1.0000 | 0.36504 | 0.96465 | 0.43532 | Biso | 1.000 | O  |
| P17  | 1.0000 | 0.16396 | 0.62506 | 0.40592 | Biso | 1.000 | P  |
| O65  | 1.0000 | 0.28019 | 0.72986 | 0.41117 | Biso | 1.000 | O  |
| O66  | 1.0000 | 0.38619 | 0.60315 | 0.09455 | Biso | 1.000 | O  |
| AI17 | 1.0000 | 0.26427 | 0.51402 | 0.86837 | Biso | 1.000 | AI |
| O67  | 1.0000 | 0.05878 | 0.93472 | 0.40300 | Biso | 1.000 | O  |
| O68  | 1.0000 | 0.46383 | 0.83693 | 0.12812 | Biso | 1.000 | O  |
| O69  | 1.0000 | 0.07418 | 0.65384 | 0.43641 | Biso | 1.000 | O  |
| AI18 | 1.0000 | 0.15753 | 0.62510 | 0.19853 | Biso | 1.000 | AI |
| O70  | 1.0000 | 0.21326 | 0.23138 | 0.95454 | Biso | 1.000 | O  |

|     |        |         |         |         |      |       |   |
|-----|--------|---------|---------|---------|------|-------|---|
| O71 | 1.0000 | 0.48867 | 0.23904 | 0.98148 | Biso | 1.000 | O |
| O72 | 1.0000 | 0.23429 | 0.53965 | 0.97694 | Biso | 1.000 | O |
| H1  | 1.0000 | 0.87230 | 0.71458 | 0.55822 | Biso | 1.000 | H |
| C1  | 1.0000 | 0.46746 | 0.44972 | 0.68912 | Biso | 1.000 | C |
| H2  | 1.0000 | 0.48332 | 0.48256 | 0.75629 | Biso | 1.000 | H |
| H3  | 1.0000 | 0.38079 | 0.38114 | 0.68566 | Biso | 1.000 | H |
| H4  | 1.0000 | 0.52011 | 0.41283 | 0.67660 | Biso | 1.000 | H |
| C2  | 1.0000 | 0.58367 | 0.54933 | 0.27826 | Biso | 1.000 | C |
| C3  | 1.0000 | 0.48268 | 0.42003 | 0.40303 | Biso | 1.000 | C |
| H5  | 1.0000 | 0.48511 | 0.34951 | 0.37356 | Biso | 1.000 | H |
| C4  | 1.0000 | 0.47973 | 0.42840 | 0.49186 | Biso | 1.000 | C |
| H6  | 1.0000 | 0.47842 | 0.36391 | 0.53366 | Biso | 1.000 | H |
| C5  | 1.0000 | 0.47994 | 0.52367 | 0.53270 | Biso | 1.000 | C |
| C6  | 1.0000 | 0.48608 | 0.53892 | 0.62364 | Biso | 1.000 | C |
| C7  | 1.0000 | 0.47767 | 0.60627 | 0.47474 | Biso | 1.000 | C |
| H7  | 1.0000 | 0.47480 | 0.67579 | 0.50526 | Biso | 1.000 | H |
| C8  | 1.0000 | 0.47750 | 0.59661 | 0.38597 | Biso | 1.000 | C |
| H8  | 1.0000 | 0.47508 | 0.65925 | 0.34368 | Biso | 1.000 | H |
| C9  | 1.0000 | 0.47968 | 0.50176 | 0.33969 | Biso | 1.000 | C |
| H9  | 1.0000 | 0.58820 | 0.48105 | 0.24579 | Biso | 1.000 | H |
| H10 | 1.0000 | 0.66032 | 0.59907 | 0.31631 | Biso | 1.000 | H |
| H11 | 1.0000 | 0.57793 | 0.60244 | 0.22743 | Biso | 1.000 | H |
| H12 | 1.0000 | 0.47992 | 0.60946 | 0.64877 | Biso | 1.000 | H |
| C10 | 1.0000 | 0.37121 | 0.43722 | 0.28377 | Biso | 1.000 | C |
| H13 | 1.0000 | 0.37211 | 0.36878 | 0.24845 | Biso | 1.000 | H |
| H14 | 1.0000 | 0.29706 | 0.40248 | 0.32612 | Biso | 1.000 | H |
| H15 | 1.0000 | 0.36671 | 0.49334 | 0.23539 | Biso | 1.000 | H |
| C11 | 1.0000 | 0.68113 | 0.63351 | 0.60968 | Biso | 1.000 | C |
| O73 | 1.0000 | 0.84565 | 0.70538 | 0.62150 | Biso | 1.000 | O |
| H16 | 1.0000 | 0.67337 | 0.64113 | 0.67984 | Biso | 1.000 | H |
| H17 | 1.0000 | 0.67720 | 0.55887 | 0.58399 | Biso | 1.000 | H |
| H18 | 1.0000 | 0.68401 | 0.69516 | 0.56423 | Biso | 1.000 | H |
| H19 | 1.0000 | 0.86825 | 0.78086 | 0.64150 | Biso | 1.000 | H |

TS-MS1/C2 in PX -based pathway

data\_image0

\_cell\_length\_a 13.8042  
 \_cell\_length\_b 13.8042  
 \_cell\_length\_c 15.044  
 \_cell\_angle\_alpha 90  
 \_cell\_angle\_beta 90  
 \_cell\_angle\_gamma 120

\_symmetry\_space\_group\_name\_H-M P 1

\_symmetry\_int\_tables\_number 1

loop\_

\_symmetry\_equiv\_pos\_as\_xyz  
 'x, y, z'

loop\_

\_atom\_site\_label  
 \_atom\_site\_occupancy  
 \_atom\_site\_fract\_x  
 \_atom\_site\_fract\_y  
 \_atom\_site\_fract\_z  
 \_atom\_site\_thermal\_displace\_type  
 \_atom\_site\_B\_iso\_or\_equiv  
 \_atom\_site\_type\_symbol

|     |        |         |         |         |      |       |    |
|-----|--------|---------|---------|---------|------|-------|----|
| P1  | 1.0000 | 0.05884 | 0.17614 | 0.52369 | Biso | 1.000 | P  |
| O1  | 1.0000 | 0.09890 | 0.30218 | 0.51332 | Biso | 1.000 | O  |
| O2  | 1.0000 | 0.31053 | 0.40704 | 0.86615 | Biso | 1.000 | O  |
| O3  | 1.0000 | 0.13907 | 0.45303 | 0.80239 | Biso | 1.000 | O  |
| Al1 | 1.0000 | 0.25248 | 0.26709 | 0.06362 | Biso | 1.000 | Al |
| O4  | 1.0000 | 0.17916 | 0.11265 | 0.28662 | Biso | 1.000 | O  |
| Al2 | 1.0000 | 0.04786 | 0.17382 | 0.72826 | Biso | 1.000 | Al |
| P2  | 1.0000 | 0.15367 | 0.06591 | 0.19059 | Biso | 1.000 | P  |
| Al3 | 1.0000 | 0.14926 | 0.05320 | 0.39608 | Biso | 1.000 | Al |
| O5  | 1.0000 | 0.08388 | 0.15296 | 0.61993 | Biso | 1.000 | O  |
| P3  | 1.0000 | 0.26644 | 0.27916 | 0.85884 | Biso | 1.000 | P  |
| O6  | 1.0000 | 0.36237 | 0.26217 | 0.82435 | Biso | 1.000 | O  |
| O7  | 1.0000 | 0.24508 | 0.03806 | 0.15971 | Biso | 1.000 | O  |
| O8  | 1.0000 | 0.48332 | 0.19482 | 0.13940 | Biso | 1.000 | O  |
| Al4 | 1.0000 | 0.06398 | 0.40693 | 0.52945 | Biso | 1.000 | Al |
| O9  | 1.0000 | 0.16878 | 0.22456 | 0.79311 | Biso | 1.000 | O  |
| P4  | 1.0000 | 0.26060 | 0.50333 | 0.07165 | Biso | 1.000 | P  |
| Al5 | 1.0000 | 0.38131 | 0.07111 | 0.19206 | Biso | 1.000 | Al |

|      |        |         |         |         |      |       |    |
|------|--------|---------|---------|---------|------|-------|----|
| O10  | 1.0000 | 0.23482 | 0.38235 | 0.08534 | Biso | 1.000 | O  |
| O11  | 1.0000 | 0.00120 | 0.27280 | 0.72404 | Biso | 1.000 | O  |
| O12  | 1.0000 | 0.40064 | 0.09611 | 0.30706 | Biso | 1.000 | O  |
| O13  | 1.0000 | 0.12712 | 0.14929 | 0.45796 | Biso | 1.000 | O  |
| O14  | 1.0000 | 0.09441 | 0.45717 | 0.64067 | Biso | 1.000 | O  |
| P5   | 1.0000 | 0.38061 | 0.07035 | 0.40749 | Biso | 1.000 | P  |
| O15  | 1.0000 | 0.27886 | 0.07677 | 0.44049 | Biso | 1.000 | O  |
| O16  | 1.0000 | 0.39216 | 0.30802 | 0.09425 | Biso | 1.000 | O  |
| P6   | 1.0000 | 0.04625 | 0.40072 | 0.73191 | Biso | 1.000 | P  |
| AI6  | 1.0000 | 0.48767 | 0.27191 | 0.86388 | Biso | 1.000 | AI |
| O17  | 1.0000 | 0.15558 | 0.15708 | 0.12938 | Biso | 1.000 | O  |
| AI7  | 1.0000 | 0.92591 | 0.60500 | 0.40300 | Biso | 1.000 | AI |
| P7   | 1.0000 | 0.72035 | 0.50815 | 0.85528 | Biso | 1.000 | P  |
| AI8  | 1.0000 | 0.59465 | 0.93825 | 0.73203 | Biso | 1.000 | AI |
| O18  | 1.0000 | 0.72086 | 0.61767 | 0.83576 | Biso | 1.000 | O  |
| O19  | 1.0000 | 0.95568 | 0.72935 | 0.16008 | Biso | 1.000 | O  |
| O20  | 1.0000 | 0.82328 | 0.82978 | 0.11676 | Biso | 1.000 | O  |
| O21  | 1.0000 | 0.56971 | 0.88189 | 0.62287 | Biso | 1.000 | O  |
| O22  | 1.0000 | 0.85295 | 0.86819 | 0.46692 | Biso | 1.000 | O  |
| O23  | 1.0000 | 0.91630 | 0.58964 | 0.28563 | Biso | 1.000 | O  |
| P8   | 1.0000 | 0.58920 | 0.92997 | 0.52701 | Biso | 1.000 | P  |
| O24  | 1.0000 | 0.70154 | 0.95150 | 0.48958 | Biso | 1.000 | O  |
| O25  | 1.0000 | 0.57443 | 0.70900 | 0.82828 | Biso | 1.000 | O  |
| O26  | 1.0000 | 0.80983 | 0.84195 | 0.78218 | Biso | 1.000 | O  |
| P9   | 1.0000 | 0.93010 | 0.61011 | 0.18472 | Biso | 1.000 | P  |
| AI9  | 1.0000 | 0.48551 | 0.72708 | 0.06593 | Biso | 1.000 | AI |
| Si1  | 1.0000 | 0.91485 | 0.82294 | 0.40133 | Biso | 1.000 | Si |
| O27  | 1.0000 | 0.89639 | 0.70434 | 0.44246 | Biso | 1.000 | O  |
| O28  | 1.0000 | 0.69712 | 0.62544 | 0.07102 | Biso | 1.000 | O  |
| O29  | 1.0000 | 0.49459 | 0.84417 | 0.46615 | Biso | 1.000 | O  |
| AI10 | 1.0000 | 0.71184 | 0.73799 | 0.85333 | Biso | 1.000 | AI |
| O30  | 1.0000 | 0.82703 | 0.93973 | 0.63830 | Biso | 1.000 | O  |
| O31  | 1.0000 | 0.82126 | 0.52129 | 0.13834 | Biso | 1.000 | O  |
| P10  | 1.0000 | 0.82630 | 0.95138 | 0.73962 | Biso | 1.000 | P  |
| AI11 | 1.0000 | 0.91826 | 0.82997 | 0.19652 | Biso | 1.000 | AI |
| AI12 | 1.0000 | 0.82968 | 0.96200 | 0.52180 | Biso | 1.000 | AI |
| O32  | 1.0000 | 0.85999 | 0.80002 | 0.30115 | Biso | 1.000 | O  |
| O33  | 1.0000 | 0.83180 | 0.47107 | 0.44748 | Biso | 1.000 | O  |
| O34  | 1.0000 | 0.49284 | 0.83632 | 0.80246 | Biso | 1.000 | O  |
| P11  | 1.0000 | 0.72143 | 0.74769 | 0.06225 | Biso | 1.000 | P  |
| O35  | 1.0000 | 0.61755 | 0.75075 | 0.09775 | Biso | 1.000 | O  |
| O36  | 1.0000 | 0.73035 | 0.97286 | 0.76889 | Biso | 1.000 | O  |
| O37  | 1.0000 | 0.82199 | 0.42283 | 0.61043 | Biso | 1.000 | O  |
| O38  | 1.0000 | 0.48469 | 0.16118 | 0.45745 | Biso | 1.000 | O  |

|      |        |         |         |         |      |       |    |
|------|--------|---------|---------|---------|------|-------|----|
| O39  | 1.0000 | 0.58676 | 0.04036 | 0.52817 | Biso | 1.000 | O  |
| P12  | 1.0000 | 0.82435 | 0.38341 | 0.51437 | Biso | 1.000 | P  |
| O40  | 1.0000 | 0.71655 | 0.27264 | 0.49346 | Biso | 1.000 | O  |
| O41  | 1.0000 | 0.59765 | 0.41045 | 0.85039 | Biso | 1.000 | O  |
| O42  | 1.0000 | 0.51325 | 0.17887 | 0.80282 | Biso | 1.000 | O  |
| AI13 | 1.0000 | 0.72471 | 0.51419 | 0.05939 | Biso | 1.000 | AI |
| O43  | 1.0000 | 0.93184 | 0.10637 | 0.50447 | Biso | 1.000 | O  |
| AI14 | 1.0000 | 0.82003 | 0.40071 | 0.72592 | Biso | 1.000 | AI |
| O44  | 1.0000 | 0.92345 | 0.36125 | 0.50355 | Biso | 1.000 | O  |
| P13  | 1.0000 | 0.59212 | 0.17306 | 0.73311 | Biso | 1.000 | P  |
| O45  | 1.0000 | 0.57825 | 0.05570 | 0.73725 | Biso | 1.000 | O  |
| AI15 | 1.0000 | 0.58663 | 0.16655 | 0.53026 | Biso | 1.000 | AI |
| O46  | 1.0000 | 0.93908 | 0.04898 | 0.77341 | Biso | 1.000 | O  |
| O47  | 1.0000 | 0.79417 | 0.49463 | 0.78561 | Biso | 1.000 | O  |
| P14  | 1.0000 | 0.48707 | 0.28168 | 0.07283 | Biso | 1.000 | P  |
| O48  | 1.0000 | 0.59971 | 0.39005 | 0.08355 | Biso | 1.000 | O  |
| O49  | 1.0000 | 0.71574 | 0.26143 | 0.75273 | Biso | 1.000 | O  |
| O50  | 1.0000 | 0.95050 | 0.42030 | 0.76134 | Biso | 1.000 | O  |
| O51  | 1.0000 | 0.55817 | 0.19426 | 0.63952 | Biso | 1.000 | O  |
| O52  | 1.0000 | 0.47692 | 0.75244 | 0.95279 | Biso | 1.000 | O  |
| O53  | 1.0000 | 0.76866 | 0.51160 | 0.94934 | Biso | 1.000 | O  |
| O54  | 1.0000 | 0.74272 | 0.78511 | 0.96383 | Biso | 1.000 | O  |
| P15  | 1.0000 | 0.38533 | 0.84556 | 0.18903 | Biso | 1.000 | P  |
| O55  | 1.0000 | 0.40474 | 0.96145 | 0.16177 | Biso | 1.000 | O  |
| AI16 | 1.0000 | 0.38901 | 0.84380 | 0.39988 | Biso | 1.000 | AI |
| P16  | 1.0000 | 0.47859 | 0.73218 | 0.85196 | Biso | 1.000 | P  |
| O56  | 1.0000 | 0.36635 | 0.63054 | 0.82212 | Biso | 1.000 | O  |
| O57  | 1.0000 | 0.25913 | 0.75838 | 0.17888 | Biso | 1.000 | O  |
| O58  | 1.0000 | 0.03840 | 0.96183 | 0.18256 | Biso | 1.000 | O  |
| O59  | 1.0000 | 0.19002 | 0.52508 | 0.13902 | Biso | 1.000 | O  |
| O60  | 1.0000 | 0.15504 | 0.51455 | 0.45790 | Biso | 1.000 | O  |
| O61  | 1.0000 | 0.02716 | 0.59423 | 0.15001 | Biso | 1.000 | O  |
| O62  | 1.0000 | 0.42393 | 0.84740 | 0.28628 | Biso | 1.000 | O  |
| O63  | 1.0000 | 0.14651 | 0.57934 | 0.30531 | Biso | 1.000 | O  |
| O64  | 1.0000 | 0.36280 | 0.95233 | 0.42738 | Biso | 1.000 | O  |
| P17  | 1.0000 | 0.15700 | 0.61148 | 0.40485 | Biso | 1.000 | P  |
| O65  | 1.0000 | 0.27113 | 0.71542 | 0.42405 | Biso | 1.000 | O  |
| O66  | 1.0000 | 0.38742 | 0.58426 | 0.08961 | Biso | 1.000 | O  |
| AI17 | 1.0000 | 0.26029 | 0.50306 | 0.86567 | Biso | 1.000 | AI |
| O67  | 1.0000 | 0.04961 | 0.91399 | 0.39495 | Biso | 1.000 | O  |
| O68  | 1.0000 | 0.45662 | 0.81686 | 0.12781 | Biso | 1.000 | O  |
| O69  | 1.0000 | 0.06300 | 0.63367 | 0.43430 | Biso | 1.000 | O  |
| AI18 | 1.0000 | 0.15472 | 0.61625 | 0.19234 | Biso | 1.000 | AI |
| O70  | 1.0000 | 0.22613 | 0.22417 | 0.95136 | Biso | 1.000 | O  |

|     |        |         |         |         |      |       |   |
|-----|--------|---------|---------|---------|------|-------|---|
| O71 | 1.0000 | 0.47253 | 0.23394 | 0.97743 | Biso | 1.000 | O |
| O72 | 1.0000 | 0.22931 | 0.52111 | 0.97652 | Biso | 1.000 | O |
| H1  | 1.0000 | 0.81032 | 0.66921 | 0.55735 | Biso | 1.000 | H |
| C1  | 1.0000 | 0.49599 | 0.50230 | 0.67951 | Biso | 1.000 | C |
| O73 | 1.0000 | 0.77066 | 0.64562 | 0.61395 | Biso | 1.000 | O |
| H2  | 1.0000 | 0.47843 | 0.49271 | 0.75027 | Biso | 1.000 | H |
| H3  | 1.0000 | 0.55194 | 0.47019 | 0.66392 | Biso | 1.000 | H |
| H4  | 1.0000 | 0.54067 | 0.59118 | 0.66321 | Biso | 1.000 | H |
| H5  | 1.0000 | 0.81091 | 0.71078 | 0.65165 | Biso | 1.000 | H |
| C2  | 1.0000 | 0.33860 | 0.43425 | 0.31489 | Biso | 1.000 | C |
| H6  | 1.0000 | 0.35995 | 0.40437 | 0.25548 | Biso | 1.000 | H |
| H7  | 1.0000 | 0.29022 | 0.36920 | 0.36276 | Biso | 1.000 | H |
| H8  | 1.0000 | 0.30081 | 0.48405 | 0.29662 | Biso | 1.000 | H |
| C3  | 1.0000 | 0.56787 | 0.54640 | 0.26991 | Biso | 1.000 | C |
| C4  | 1.0000 | 0.50007 | 0.41544 | 0.40285 | Biso | 1.000 | C |
| H9  | 1.0000 | 0.53760 | 0.36990 | 0.37414 | Biso | 1.000 | H |
| C5  | 1.0000 | 0.46084 | 0.39550 | 0.48816 | Biso | 1.000 | C |
| H10 | 1.0000 | 0.46602 | 0.33230 | 0.52725 | Biso | 1.000 | H |
| C6  | 1.0000 | 0.41491 | 0.45740 | 0.52874 | Biso | 1.000 | C |
| C7  | 1.0000 | 0.38679 | 0.44094 | 0.62565 | Biso | 1.000 | C |
| C8  | 1.0000 | 0.40677 | 0.53717 | 0.47957 | Biso | 1.000 | C |
| H11 | 1.0000 | 0.37348 | 0.58633 | 0.50833 | Biso | 1.000 | H |
| C9  | 1.0000 | 0.44454 | 0.55785 | 0.39024 | Biso | 1.000 | C |
| H12 | 1.0000 | 0.45203 | 0.63050 | 0.35620 | Biso | 1.000 | H |
| C10 | 1.0000 | 0.49506 | 0.49981 | 0.35047 | Biso | 1.000 | C |
| H13 | 1.0000 | 0.57125 | 0.48090 | 0.23213 | Biso | 1.000 | H |
| H14 | 1.0000 | 0.65248 | 0.60639 | 0.29271 | Biso | 1.000 | H |
| H15 | 1.0000 | 0.54025 | 0.59107 | 0.22667 | Biso | 1.000 | H |
| H16 | 1.0000 | 0.33156 | 0.47385 | 0.64210 | Biso | 1.000 | H |
| H17 | 1.0000 | 0.34283 | 0.35153 | 0.64136 | Biso | 1.000 | H |

TS-MS2/C2 in PX -based pathway

data\_image0

\_cell\_length\_a 13.8042  
 \_cell\_length\_b 13.8042  
 \_cell\_length\_c 15.044  
 \_cell\_angle\_alpha 90  
 \_cell\_angle\_beta 90  
 \_cell\_angle\_gamma 120

\_symmetry\_space\_group\_name\_H-M P 1

\_symmetry\_int\_tables\_number 1

loop\_

\_symmetry\_equiv\_pos\_as\_xyz  
 'x, y, z'

loop\_

\_atom\_site\_label  
 \_atom\_site\_occupancy  
 \_atom\_site\_fract\_x  
 \_atom\_site\_fract\_y  
 \_atom\_site\_fract\_z  
 \_atom\_site\_thermal\_displace\_type  
 \_atom\_site\_B\_iso\_or\_equiv  
 \_atom\_site\_type\_symbol

|     |        |         |         |         |      |       |    |
|-----|--------|---------|---------|---------|------|-------|----|
| P1  | 1.0000 | 0.05343 | 0.18899 | 0.52470 | Biso | 1.000 | P  |
| O1  | 1.0000 | 0.09492 | 0.31507 | 0.51038 | Biso | 1.000 | O  |
| O2  | 1.0000 | 0.30386 | 0.40997 | 0.83213 | Biso | 1.000 | O  |
| O3  | 1.0000 | 0.13568 | 0.47475 | 0.80847 | Biso | 1.000 | O  |
| Al1 | 1.0000 | 0.25906 | 0.29013 | 0.06877 | Biso | 1.000 | Al |
| O4  | 1.0000 | 0.18056 | 0.13181 | 0.28592 | Biso | 1.000 | O  |
| Al2 | 1.0000 | 0.04910 | 0.17962 | 0.73085 | Biso | 1.000 | Al |
| P2  | 1.0000 | 0.15348 | 0.08368 | 0.19009 | Biso | 1.000 | P  |
| Al3 | 1.0000 | 0.15108 | 0.07035 | 0.39473 | Biso | 1.000 | Al |
| O5  | 1.0000 | 0.08670 | 0.17088 | 0.61958 | Biso | 1.000 | O  |
| P3  | 1.0000 | 0.26328 | 0.28607 | 0.85667 | Biso | 1.000 | P  |
| O6  | 1.0000 | 0.35881 | 0.26159 | 0.83936 | Biso | 1.000 | O  |
| O7  | 1.0000 | 0.24263 | 0.05265 | 0.15968 | Biso | 1.000 | O  |
| O8  | 1.0000 | 0.48329 | 0.21010 | 0.15017 | Biso | 1.000 | O  |
| Al4 | 1.0000 | 0.06136 | 0.42014 | 0.53249 | Biso | 1.000 | Al |
| O9  | 1.0000 | 0.16356 | 0.20669 | 0.79807 | Biso | 1.000 | O  |
| P4  | 1.0000 | 0.27109 | 0.51902 | 0.07478 | Biso | 1.000 | P  |
| Al5 | 1.0000 | 0.37704 | 0.08163 | 0.19323 | Biso | 1.000 | Al |

|      |        |         |         |         |      |       |    |
|------|--------|---------|---------|---------|------|-------|----|
| O10  | 1.0000 | 0.25089 | 0.40548 | 0.10993 | Biso | 1.000 | O  |
| O11  | 1.0000 | 0.01063 | 0.28446 | 0.73735 | Biso | 1.000 | O  |
| O12  | 1.0000 | 0.39012 | 0.09171 | 0.30918 | Biso | 1.000 | O  |
| O13  | 1.0000 | 0.11381 | 0.15642 | 0.45561 | Biso | 1.000 | O  |
| O14  | 1.0000 | 0.09077 | 0.46219 | 0.64514 | Biso | 1.000 | O  |
| P5   | 1.0000 | 0.37577 | 0.07963 | 0.41088 | Biso | 1.000 | P  |
| O15  | 1.0000 | 0.28130 | 0.09967 | 0.44245 | Biso | 1.000 | O  |
| O16  | 1.0000 | 0.39808 | 0.32194 | 0.08836 | Biso | 1.000 | O  |
| P6   | 1.0000 | 0.04496 | 0.41013 | 0.73820 | Biso | 1.000 | P  |
| AI6  | 1.0000 | 0.48694 | 0.27394 | 0.87167 | Biso | 1.000 | AI |
| O17  | 1.0000 | 0.15823 | 0.17487 | 0.12766 | Biso | 1.000 | O  |
| AI7  | 1.0000 | 0.93060 | 0.62188 | 0.40273 | Biso | 1.000 | AI |
| P7   | 1.0000 | 0.71380 | 0.51758 | 0.85712 | Biso | 1.000 | P  |
| AI8  | 1.0000 | 0.59405 | 0.94807 | 0.72984 | Biso | 1.000 | AI |
| O18  | 1.0000 | 0.70227 | 0.61711 | 0.82434 | Biso | 1.000 | O  |
| O19  | 1.0000 | 0.96109 | 0.74850 | 0.16334 | Biso | 1.000 | O  |
| O20  | 1.0000 | 0.81955 | 0.84056 | 0.12080 | Biso | 1.000 | O  |
| O21  | 1.0000 | 0.57366 | 0.89718 | 0.61954 | Biso | 1.000 | O  |
| O22  | 1.0000 | 0.87059 | 0.89353 | 0.46727 | Biso | 1.000 | O  |
| O23  | 1.0000 | 0.91295 | 0.60248 | 0.28610 | Biso | 1.000 | O  |
| P8   | 1.0000 | 0.59213 | 0.94320 | 0.52337 | Biso | 1.000 | P  |
| O24  | 1.0000 | 0.69786 | 0.95103 | 0.48215 | Biso | 1.000 | O  |
| O25  | 1.0000 | 0.57357 | 0.72370 | 0.84798 | Biso | 1.000 | O  |
| O26  | 1.0000 | 0.80264 | 0.84644 | 0.77977 | Biso | 1.000 | O  |
| P9   | 1.0000 | 0.93294 | 0.62787 | 0.18580 | Biso | 1.000 | P  |
| AI9  | 1.0000 | 0.48639 | 0.74989 | 0.06260 | Biso | 1.000 | AI |
| Si1  | 1.0000 | 0.92523 | 0.84178 | 0.40079 | Biso | 1.000 | Si |
| O27  | 1.0000 | 0.90536 | 0.72353 | 0.44343 | Biso | 1.000 | O  |
| O28  | 1.0000 | 0.68459 | 0.63520 | 0.08462 | Biso | 1.000 | O  |
| O29  | 1.0000 | 0.49098 | 0.86070 | 0.46660 | Biso | 1.000 | O  |
| AI10 | 1.0000 | 0.71008 | 0.74358 | 0.85424 | Biso | 1.000 | AI |
| O30  | 1.0000 | 0.81681 | 0.94263 | 0.63626 | Biso | 1.000 | O  |
| O31  | 1.0000 | 0.82651 | 0.54182 | 0.13564 | Biso | 1.000 | O  |
| P10  | 1.0000 | 0.82105 | 0.95673 | 0.73748 | Biso | 1.000 | P  |
| AI11 | 1.0000 | 0.92046 | 0.84719 | 0.19751 | Biso | 1.000 | AI |
| AI12 | 1.0000 | 0.82883 | 0.97383 | 0.52125 | Biso | 1.000 | AI |
| O32  | 1.0000 | 0.86457 | 0.81695 | 0.30300 | Biso | 1.000 | O  |
| O33  | 1.0000 | 0.83514 | 0.49206 | 0.45235 | Biso | 1.000 | O  |
| O34  | 1.0000 | 0.49065 | 0.84303 | 0.79626 | Biso | 1.000 | O  |
| P11  | 1.0000 | 0.72348 | 0.75941 | 0.06068 | Biso | 1.000 | P  |
| O35  | 1.0000 | 0.62445 | 0.78012 | 0.07450 | Biso | 1.000 | O  |
| O36  | 1.0000 | 0.72837 | 0.98190 | 0.76902 | Biso | 1.000 | O  |
| O37  | 1.0000 | 0.81980 | 0.43788 | 0.61443 | Biso | 1.000 | O  |
| O38  | 1.0000 | 0.48582 | 0.16952 | 0.45448 | Biso | 1.000 | O  |



|      |        |         |         |         |      |       |    |
|------|--------|---------|---------|---------|------|-------|----|
| O39  | 1.0000 | 0.60353 | 0.06034 | 0.52344 | Biso | 1.000 | O  |
| P12  | 1.0000 | 0.82347 | 0.40132 | 0.51774 | Biso | 1.000 | P  |
| O40  | 1.0000 | 0.71385 | 0.29384 | 0.49423 | Biso | 1.000 | O  |
| O41  | 1.0000 | 0.59528 | 0.41297 | 0.85823 | Biso | 1.000 | O  |
| O42  | 1.0000 | 0.50719 | 0.18382 | 0.80193 | Biso | 1.000 | O  |
| AI13 | 1.0000 | 0.72165 | 0.53096 | 0.06383 | Biso | 1.000 | AI |
| O43  | 1.0000 | 0.92468 | 0.12169 | 0.51307 | Biso | 1.000 | O  |
| AI14 | 1.0000 | 0.81566 | 0.40965 | 0.72921 | Biso | 1.000 | AI |
| O44  | 1.0000 | 0.92136 | 0.37716 | 0.50660 | Biso | 1.000 | O  |
| P13  | 1.0000 | 0.58708 | 0.17979 | 0.73235 | Biso | 1.000 | P  |
| O45  | 1.0000 | 0.57590 | 0.06377 | 0.73753 | Biso | 1.000 | O  |
| AI15 | 1.0000 | 0.58810 | 0.17861 | 0.52862 | Biso | 1.000 | AI |
| O46  | 1.0000 | 0.93577 | 0.05280 | 0.76840 | Biso | 1.000 | O  |
| O47  | 1.0000 | 0.79211 | 0.50216 | 0.79318 | Biso | 1.000 | O  |
| P14  | 1.0000 | 0.49168 | 0.29182 | 0.07654 | Biso | 1.000 | P  |
| O48  | 1.0000 | 0.60520 | 0.39936 | 0.08545 | Biso | 1.000 | O  |
| O49  | 1.0000 | 0.70997 | 0.26999 | 0.75185 | Biso | 1.000 | O  |
| O50  | 1.0000 | 0.94299 | 0.42138 | 0.76314 | Biso | 1.000 | O  |
| O51  | 1.0000 | 0.55265 | 0.19836 | 0.63812 | Biso | 1.000 | O  |
| O52  | 1.0000 | 0.45793 | 0.77084 | 0.95223 | Biso | 1.000 | O  |
| O53  | 1.0000 | 0.76502 | 0.53989 | 0.95183 | Biso | 1.000 | O  |
| O54  | 1.0000 | 0.76332 | 0.78326 | 0.96276 | Biso | 1.000 | O  |
| P15  | 1.0000 | 0.38816 | 0.86500 | 0.19250 | Biso | 1.000 | P  |
| O55  | 1.0000 | 0.39623 | 0.97219 | 0.15365 | Biso | 1.000 | O  |
| AI16 | 1.0000 | 0.38613 | 0.86134 | 0.40062 | Biso | 1.000 | AI |
| P16  | 1.0000 | 0.47361 | 0.74452 | 0.85487 | Biso | 1.000 | P  |
| O56  | 1.0000 | 0.36731 | 0.63949 | 0.82126 | Biso | 1.000 | O  |
| O57  | 1.0000 | 0.26386 | 0.77052 | 0.19248 | Biso | 1.000 | O  |
| O58  | 1.0000 | 0.03624 | 0.98196 | 0.18232 | Biso | 1.000 | O  |
| O59  | 1.0000 | 0.19287 | 0.54862 | 0.12557 | Biso | 1.000 | O  |
| O60  | 1.0000 | 0.15676 | 0.53002 | 0.46355 | Biso | 1.000 | O  |
| O61  | 1.0000 | 0.03117 | 0.61262 | 0.15372 | Biso | 1.000 | O  |
| O62  | 1.0000 | 0.43380 | 0.88600 | 0.28915 | Biso | 1.000 | O  |
| O63  | 1.0000 | 0.14219 | 0.57625 | 0.30438 | Biso | 1.000 | O  |
| O64  | 1.0000 | 0.35036 | 0.96040 | 0.43870 | Biso | 1.000 | O  |
| P17  | 1.0000 | 0.15852 | 0.62047 | 0.40147 | Biso | 1.000 | P  |
| O65  | 1.0000 | 0.27548 | 0.72428 | 0.41094 | Biso | 1.000 | O  |
| O66  | 1.0000 | 0.39568 | 0.60766 | 0.09189 | Biso | 1.000 | O  |
| AI17 | 1.0000 | 0.26249 | 0.50891 | 0.85958 | Biso | 1.000 | AI |
| O67  | 1.0000 | 0.06020 | 0.92878 | 0.38933 | Biso | 1.000 | O  |
| O68  | 1.0000 | 0.46153 | 0.83438 | 0.13542 | Biso | 1.000 | O  |
| O69  | 1.0000 | 0.06846 | 0.64930 | 0.42873 | Biso | 1.000 | O  |
| AI18 | 1.0000 | 0.15711 | 0.62830 | 0.19395 | Biso | 1.000 | AI |
| O70  | 1.0000 | 0.22580 | 0.26522 | 0.95504 | Biso | 1.000 | O  |

|     |        |         |         |         |      |       |   |
|-----|--------|---------|---------|---------|------|-------|---|
| O71 | 1.0000 | 0.48019 | 0.23549 | 0.98464 | Biso | 1.000 | O |
| O72 | 1.0000 | 0.24338 | 0.51172 | 0.97487 | Biso | 1.000 | O |
| H1  | 1.0000 | 0.81986 | 0.68710 | 0.55739 | Biso | 1.000 | H |
| H2  | 1.0000 | 0.46578 | 0.31580 | 0.55817 | Biso | 1.000 | H |
| C1  | 1.0000 | 0.57928 | 0.72460 | 0.29755 | Biso | 1.000 | C |
| C2  | 1.0000 | 0.59977 | 0.57351 | 0.37633 | Biso | 1.000 | C |
| H3  | 1.0000 | 0.68089 | 0.60451 | 0.34541 | Biso | 1.000 | H |
| C3  | 1.0000 | 0.56344 | 0.48699 | 0.44014 | Biso | 1.000 | C |
| H4  | 1.0000 | 0.61835 | 0.45441 | 0.45589 | Biso | 1.000 | H |
| C4  | 1.0000 | 0.46429 | 0.44838 | 0.48644 | Biso | 1.000 | C |
| C5  | 1.0000 | 0.43498 | 0.37402 | 0.56642 | Biso | 1.000 | C |
| C6  | 1.0000 | 0.39523 | 0.49402 | 0.46322 | Biso | 1.000 | C |
| H5  | 1.0000 | 0.32327 | 0.47546 | 0.50378 | Biso | 1.000 | H |
| C7  | 1.0000 | 0.43141 | 0.58083 | 0.39841 | Biso | 1.000 | C |
| H6  | 1.0000 | 0.38649 | 0.62594 | 0.39295 | Biso | 1.000 | H |
| C8  | 1.0000 | 0.53800 | 0.62441 | 0.35649 | Biso | 1.000 | C |
| H7  | 1.0000 | 0.65046 | 0.73689 | 0.25840 | Biso | 1.000 | H |
| H8  | 1.0000 | 0.60613 | 0.80007 | 0.33745 | Biso | 1.000 | H |
| H9  | 1.0000 | 0.51272 | 0.71673 | 0.25397 | Biso | 1.000 | H |
| H10 | 1.0000 | 0.34410 | 0.32384 | 0.57417 | Biso | 1.000 | H |
| C9  | 1.0000 | 0.32630 | 0.43740 | 0.34865 | Biso | 1.000 | C |
| H11 | 1.0000 | 0.37973 | 0.41231 | 0.31533 | Biso | 1.000 | H |
| H12 | 1.0000 | 0.25660 | 0.36975 | 0.38394 | Biso | 1.000 | H |
| H13 | 1.0000 | 0.29435 | 0.47825 | 0.30566 | Biso | 1.000 | H |
| C10 | 1.0000 | 0.48820 | 0.44627 | 0.64986 | Biso | 1.000 | C |
| O73 | 1.0000 | 0.77337 | 0.65763 | 0.61046 | Biso | 1.000 | O |
| H14 | 1.0000 | 0.46859 | 0.39296 | 0.70793 | Biso | 1.000 | H |
| H15 | 1.0000 | 0.57877 | 0.49670 | 0.64253 | Biso | 1.000 | H |
| H16 | 1.0000 | 0.45611 | 0.50335 | 0.66183 | Biso | 1.000 | H |
| H17 | 1.0000 | 0.80241 | 0.72108 | 0.65044 | Biso | 1.000 | H |

TS-MS3/C2 in PX -based pathway

data\_image0

\_cell\_length\_a 13.8042  
 \_cell\_length\_b 13.8042  
 \_cell\_length\_c 15.044  
 \_cell\_angle\_alpha 90  
 \_cell\_angle\_beta 90  
 \_cell\_angle\_gamma 120

\_symmetry\_space\_group\_name\_H-M P 1

\_symmetry\_int\_tables\_number 1

loop\_

\_symmetry\_equiv\_pos\_as\_xyz  
 'x, y, z'

loop\_

\_atom\_site\_label  
 \_atom\_site\_occupancy  
 \_atom\_site\_fract\_x  
 \_atom\_site\_fract\_y  
 \_atom\_site\_fract\_z  
 \_atom\_site\_thermal\_displace\_type  
 \_atom\_site\_B\_iso\_or\_equiv  
 \_atom\_site\_type\_symbol

|     |        |         |         |         |      |       |    |
|-----|--------|---------|---------|---------|------|-------|----|
| P1  | 1.0000 | 0.05186 | 0.18894 | 0.52899 | Biso | 1.000 | P  |
| O1  | 1.0000 | 0.09164 | 0.31497 | 0.51693 | Biso | 1.000 | O  |
| O2  | 1.0000 | 0.29279 | 0.40450 | 0.82232 | Biso | 1.000 | O  |
| O3  | 1.0000 | 0.13811 | 0.48782 | 0.80637 | Biso | 1.000 | O  |
| Al1 | 1.0000 | 0.26229 | 0.29057 | 0.07052 | Biso | 1.000 | Al |
| O4  | 1.0000 | 0.16753 | 0.12877 | 0.28278 | Biso | 1.000 | O  |
| Al2 | 1.0000 | 0.04735 | 0.18164 | 0.73417 | Biso | 1.000 | Al |
| P2  | 1.0000 | 0.15123 | 0.07801 | 0.18802 | Biso | 1.000 | P  |
| Al3 | 1.0000 | 0.14827 | 0.07464 | 0.39367 | Biso | 1.000 | Al |
| O5  | 1.0000 | 0.08570 | 0.17013 | 0.62355 | Biso | 1.000 | O  |
| P3  | 1.0000 | 0.26202 | 0.28486 | 0.85297 | Biso | 1.000 | P  |
| O6  | 1.0000 | 0.35643 | 0.26211 | 0.82484 | Biso | 1.000 | O  |
| O7  | 1.0000 | 0.24263 | 0.04597 | 0.16898 | Biso | 1.000 | O  |
| O8  | 1.0000 | 0.48257 | 0.20477 | 0.14381 | Biso | 1.000 | O  |
| Al4 | 1.0000 | 0.05083 | 0.41550 | 0.53401 | Biso | 1.000 | Al |
| O9  | 1.0000 | 0.15328 | 0.19729 | 0.80739 | Biso | 1.000 | O  |
| P4  | 1.0000 | 0.26182 | 0.51164 | 0.07481 | Biso | 1.000 | P  |
| Al5 | 1.0000 | 0.38080 | 0.08100 | 0.19491 | Biso | 1.000 | Al |

|      |        |         |         |         |      |       |    |
|------|--------|---------|---------|---------|------|-------|----|
| O10  | 1.0000 | 0.24140 | 0.39844 | 0.11131 | Biso | 1.000 | O  |
| O11  | 1.0000 | 0.01859 | 0.29301 | 0.74040 | Biso | 1.000 | O  |
| O12  | 1.0000 | 0.40688 | 0.10530 | 0.30955 | Biso | 1.000 | O  |
| O13  | 1.0000 | 0.11349 | 0.15936 | 0.45882 | Biso | 1.000 | O  |
| O14  | 1.0000 | 0.08167 | 0.46571 | 0.64485 | Biso | 1.000 | O  |
| P5   | 1.0000 | 0.37419 | 0.08260 | 0.40867 | Biso | 1.000 | P  |
| O15  | 1.0000 | 0.28495 | 0.11377 | 0.43289 | Biso | 1.000 | O  |
| O16  | 1.0000 | 0.40055 | 0.32676 | 0.10087 | Biso | 1.000 | O  |
| P6   | 1.0000 | 0.04475 | 0.41619 | 0.73986 | Biso | 1.000 | P  |
| AI6  | 1.0000 | 0.48209 | 0.28007 | 0.87039 | Biso | 1.000 | AI |
| O17  | 1.0000 | 0.16144 | 0.16630 | 0.11984 | Biso | 1.000 | O  |
| AI7  | 1.0000 | 0.92797 | 0.62257 | 0.39977 | Biso | 1.000 | AI |
| P7   | 1.0000 | 0.70750 | 0.51704 | 0.85699 | Biso | 1.000 | P  |
| AI8  | 1.0000 | 0.58572 | 0.94601 | 0.73139 | Biso | 1.000 | AI |
| O18  | 1.0000 | 0.70969 | 0.62274 | 0.82121 | Biso | 1.000 | O  |
| O19  | 1.0000 | 0.95760 | 0.74091 | 0.16431 | Biso | 1.000 | O  |
| O20  | 1.0000 | 0.81366 | 0.83342 | 0.12531 | Biso | 1.000 | O  |
| O21  | 1.0000 | 0.56401 | 0.89649 | 0.62035 | Biso | 1.000 | O  |
| O22  | 1.0000 | 0.86556 | 0.89105 | 0.46790 | Biso | 1.000 | O  |
| O23  | 1.0000 | 0.88212 | 0.59287 | 0.28743 | Biso | 1.000 | O  |
| P8   | 1.0000 | 0.59339 | 0.95218 | 0.52703 | Biso | 1.000 | P  |
| O24  | 1.0000 | 0.69452 | 0.94963 | 0.48675 | Biso | 1.000 | O  |
| O25  | 1.0000 | 0.57481 | 0.72419 | 0.85230 | Biso | 1.000 | O  |
| O26  | 1.0000 | 0.80167 | 0.85262 | 0.78582 | Biso | 1.000 | O  |
| P9   | 1.0000 | 0.92380 | 0.61936 | 0.19025 | Biso | 1.000 | P  |
| AI9  | 1.0000 | 0.48118 | 0.74299 | 0.06668 | Biso | 1.000 | AI |
| Si1  | 1.0000 | 0.92769 | 0.84385 | 0.40445 | Biso | 1.000 | Si |
| O27  | 1.0000 | 0.90904 | 0.72577 | 0.44642 | Biso | 1.000 | O  |
| O28  | 1.0000 | 0.68287 | 0.62788 | 0.08762 | Biso | 1.000 | O  |
| O29  | 1.0000 | 0.49308 | 0.88612 | 0.46486 | Biso | 1.000 | O  |
| AI10 | 1.0000 | 0.71136 | 0.74467 | 0.85706 | Biso | 1.000 | AI |
| O30  | 1.0000 | 0.81339 | 0.93871 | 0.63875 | Biso | 1.000 | O  |
| O31  | 1.0000 | 0.82876 | 0.53513 | 0.12923 | Biso | 1.000 | O  |
| P10  | 1.0000 | 0.81632 | 0.95901 | 0.73927 | Biso | 1.000 | P  |
| AI11 | 1.0000 | 0.91983 | 0.84234 | 0.19739 | Biso | 1.000 | AI |
| AI12 | 1.0000 | 0.82615 | 0.97212 | 0.52417 | Biso | 1.000 | AI |
| O32  | 1.0000 | 0.87198 | 0.82071 | 0.30506 | Biso | 1.000 | O  |
| O33  | 1.0000 | 0.84629 | 0.49722 | 0.45821 | Biso | 1.000 | O  |
| O34  | 1.0000 | 0.48849 | 0.84085 | 0.80104 | Biso | 1.000 | O  |
| P11  | 1.0000 | 0.71962 | 0.75162 | 0.06394 | Biso | 1.000 | P  |
| O35  | 1.0000 | 0.61799 | 0.76838 | 0.07640 | Biso | 1.000 | O  |
| O36  | 1.0000 | 0.72217 | 0.98358 | 0.76704 | Biso | 1.000 | O  |
| O37  | 1.0000 | 0.81932 | 0.43601 | 0.61821 | Biso | 1.000 | O  |
| O38  | 1.0000 | 0.47886 | 0.15950 | 0.46391 | Biso | 1.000 | O  |

|      |        |         |         |         |      |       |    |
|------|--------|---------|---------|---------|------|-------|----|
| O39  | 1.0000 | 0.62170 | 0.07548 | 0.53566 | Biso | 1.000 | O  |
| P12  | 1.0000 | 0.82027 | 0.40013 | 0.52106 | Biso | 1.000 | P  |
| O40  | 1.0000 | 0.70398 | 0.30344 | 0.49428 | Biso | 1.000 | O  |
| O41  | 1.0000 | 0.58306 | 0.42347 | 0.86480 | Biso | 1.000 | O  |
| O42  | 1.0000 | 0.52180 | 0.19798 | 0.80977 | Biso | 1.000 | O  |
| AI13 | 1.0000 | 0.72122 | 0.52584 | 0.06182 | Biso | 1.000 | AI |
| O43  | 1.0000 | 0.92328 | 0.11973 | 0.51717 | Biso | 1.000 | O  |
| AI14 | 1.0000 | 0.81181 | 0.40177 | 0.73160 | Biso | 1.000 | AI |
| O44  | 1.0000 | 0.90750 | 0.36071 | 0.51076 | Biso | 1.000 | O  |
| P13  | 1.0000 | 0.58712 | 0.17876 | 0.73581 | Biso | 1.000 | P  |
| O45  | 1.0000 | 0.55868 | 0.05638 | 0.74168 | Biso | 1.000 | O  |
| AI15 | 1.0000 | 0.58789 | 0.18231 | 0.53489 | Biso | 1.000 | AI |
| O46  | 1.0000 | 0.92890 | 0.05841 | 0.76933 | Biso | 1.000 | O  |
| O47  | 1.0000 | 0.77125 | 0.48338 | 0.79213 | Biso | 1.000 | O  |
| P14  | 1.0000 | 0.48748 | 0.29079 | 0.07618 | Biso | 1.000 | P  |
| O48  | 1.0000 | 0.60531 | 0.39304 | 0.07957 | Biso | 1.000 | O  |
| O49  | 1.0000 | 0.71502 | 0.25694 | 0.74755 | Biso | 1.000 | O  |
| O50  | 1.0000 | 0.94051 | 0.42115 | 0.76950 | Biso | 1.000 | O  |
| O51  | 1.0000 | 0.55070 | 0.20196 | 0.64387 | Biso | 1.000 | O  |
| O52  | 1.0000 | 0.45389 | 0.76529 | 0.95604 | Biso | 1.000 | O  |
| O53  | 1.0000 | 0.76426 | 0.53956 | 0.94949 | Biso | 1.000 | O  |
| O54  | 1.0000 | 0.76177 | 0.77728 | 0.96673 | Biso | 1.000 | O  |
| P15  | 1.0000 | 0.38323 | 0.85840 | 0.19014 | Biso | 1.000 | P  |
| O55  | 1.0000 | 0.40168 | 0.97212 | 0.15748 | Biso | 1.000 | O  |
| AI16 | 1.0000 | 0.37446 | 0.86008 | 0.40430 | Biso | 1.000 | AI |
| P16  | 1.0000 | 0.47314 | 0.74225 | 0.85862 | Biso | 1.000 | P  |
| O56  | 1.0000 | 0.37000 | 0.63655 | 0.82237 | Biso | 1.000 | O  |
| O57  | 1.0000 | 0.26028 | 0.76712 | 0.17175 | Biso | 1.000 | O  |
| O58  | 1.0000 | 0.03565 | 0.97507 | 0.17557 | Biso | 1.000 | O  |
| O59  | 1.0000 | 0.17688 | 0.53789 | 0.11871 | Biso | 1.000 | O  |
| O60  | 1.0000 | 0.13663 | 0.52345 | 0.46066 | Biso | 1.000 | O  |
| O61  | 1.0000 | 0.02467 | 0.60192 | 0.17625 | Biso | 1.000 | O  |
| O62  | 1.0000 | 0.40903 | 0.86392 | 0.29090 | Biso | 1.000 | O  |
| O63  | 1.0000 | 0.17875 | 0.59222 | 0.30381 | Biso | 1.000 | O  |
| O64  | 1.0000 | 0.33094 | 0.95732 | 0.43012 | Biso | 1.000 | O  |
| P17  | 1.0000 | 0.16202 | 0.62325 | 0.39976 | Biso | 1.000 | P  |
| O65  | 1.0000 | 0.27230 | 0.72366 | 0.43405 | Biso | 1.000 | O  |
| O66  | 1.0000 | 0.38407 | 0.60283 | 0.09716 | Biso | 1.000 | O  |
| AI17 | 1.0000 | 0.26033 | 0.50754 | 0.85778 | Biso | 1.000 | AI |
| O67  | 1.0000 | 0.06231 | 0.93276 | 0.39753 | Biso | 1.000 | O  |
| O68  | 1.0000 | 0.46583 | 0.83341 | 0.14014 | Biso | 1.000 | O  |
| O69  | 1.0000 | 0.06996 | 0.65491 | 0.40193 | Biso | 1.000 | O  |
| AI18 | 1.0000 | 0.15935 | 0.62556 | 0.19339 | Biso | 1.000 | AI |
| O70  | 1.0000 | 0.24545 | 0.27523 | 0.95458 | Biso | 1.000 | O  |

|     |        |         |         |         |      |       |   |
|-----|--------|---------|---------|---------|------|-------|---|
| O71 | 1.0000 | 0.46093 | 0.23640 | 0.98241 | Biso | 1.000 | O |
| O72 | 1.0000 | 0.24268 | 0.50375 | 0.97338 | Biso | 1.000 | O |
| H1  | 1.0000 | 0.84125 | 0.69517 | 0.56618 | Biso | 1.000 | H |
| C1  | 1.0000 | 0.50070 | 0.47468 | 0.64905 | Biso | 1.000 | C |
| O73 | 1.0000 | 0.80233 | 0.66627 | 0.62256 | Biso | 1.000 | O |
| H2  | 1.0000 | 0.48130 | 0.42500 | 0.70927 | Biso | 1.000 | H |
| H3  | 1.0000 | 0.59081 | 0.51754 | 0.63803 | Biso | 1.000 | H |
| H4  | 1.0000 | 0.47655 | 0.53810 | 0.66018 | Biso | 1.000 | H |
| H5  | 1.0000 | 0.82044 | 0.73271 | 0.65669 | Biso | 1.000 | H |
| C2  | 1.0000 | 0.35380 | 0.38793 | 0.39619 | Biso | 1.000 | C |
| H6  | 1.0000 | 0.35366 | 0.31312 | 0.41824 | Biso | 1.000 | H |
| H7  | 1.0000 | 0.26946 | 0.37461 | 0.39927 | Biso | 1.000 | H |
| H8  | 1.0000 | 0.39529 | 0.41964 | 0.33306 | Biso | 1.000 | H |
| C3  | 1.0000 | 0.60630 | 0.75438 | 0.30864 | Biso | 1.000 | C |
| C4  | 1.0000 | 0.61369 | 0.59713 | 0.38879 | Biso | 1.000 | C |
| H9  | 1.0000 | 0.69519 | 0.62720 | 0.35899 | Biso | 1.000 | H |
| C5  | 1.0000 | 0.57134 | 0.50776 | 0.44538 | Biso | 1.000 | C |
| H10 | 1.0000 | 0.61910 | 0.46735 | 0.46174 | Biso | 1.000 | H |
| C6  | 1.0000 | 0.46431 | 0.46824 | 0.48732 | Biso | 1.000 | C |
| C7  | 1.0000 | 0.43566 | 0.39823 | 0.57046 | Biso | 1.000 | C |
| C8  | 1.0000 | 0.40433 | 0.52431 | 0.46479 | Biso | 1.000 | C |
| H11 | 1.0000 | 0.33028 | 0.50561 | 0.50270 | Biso | 1.000 | H |
| C9  | 1.0000 | 0.45068 | 0.61734 | 0.40634 | Biso | 1.000 | C |
| H12 | 1.0000 | 0.40306 | 0.65797 | 0.39236 | Biso | 1.000 | H |
| C10 | 1.0000 | 0.55446 | 0.65515 | 0.36889 | Biso | 1.000 | C |
| H13 | 1.0000 | 0.62323 | 0.73011 | 0.24421 | Biso | 1.000 | H |
| H14 | 1.0000 | 0.68705 | 0.81789 | 0.33469 | Biso | 1.000 | H |
| H15 | 1.0000 | 0.55309 | 0.79069 | 0.29943 | Biso | 1.000 | H |
| H16 | 1.0000 | 0.34569 | 0.35650 | 0.58325 | Biso | 1.000 | H |
| H17 | 1.0000 | 0.45794 | 0.33318 | 0.56214 | Biso | 1.000 | H |

TS9-10/C2 in PX -based pathway

data\_image0

\_cell\_length\_a 13.8042  
 \_cell\_length\_b 13.8042  
 \_cell\_length\_c 15.044  
 \_cell\_angle\_alpha 90  
 \_cell\_angle\_beta 90  
 \_cell\_angle\_gamma 120

\_symmetry\_space\_group\_name\_H-M P 1

\_symmetry\_int\_tables\_number 1

loop\_

\_symmetry\_equiv\_pos\_as\_xyz  
 'x, y, z'

loop\_

\_atom\_site\_label  
 \_atom\_site\_occupancy  
 \_atom\_site\_fract\_x  
 \_atom\_site\_fract\_y  
 \_atom\_site\_fract\_z  
 \_atom\_site\_thermal\_displace\_type  
 \_atom\_site\_B\_iso\_or\_equiv  
 \_atom\_site\_type\_symbol

|     |        |         |         |         |      |       |    |
|-----|--------|---------|---------|---------|------|-------|----|
| P1  | 1.0000 | 0.04726 | 0.16875 | 0.52103 | Biso | 1.000 | P  |
| O1  | 1.0000 | 0.07567 | 0.29142 | 0.51789 | Biso | 1.000 | O  |
| O2  | 1.0000 | 0.28071 | 0.39004 | 0.85162 | Biso | 1.000 | O  |
| O3  | 1.0000 | 0.13856 | 0.47883 | 0.79452 | Biso | 1.000 | O  |
| Al1 | 1.0000 | 0.24910 | 0.26405 | 0.06226 | Biso | 1.000 | Al |
| O4  | 1.0000 | 0.17968 | 0.11645 | 0.28222 | Biso | 1.000 | O  |
| Al2 | 1.0000 | 0.04459 | 0.16943 | 0.72651 | Biso | 1.000 | Al |
| P2  | 1.0000 | 0.14832 | 0.06267 | 0.18864 | Biso | 1.000 | P  |
| Al3 | 1.0000 | 0.15260 | 0.06476 | 0.39334 | Biso | 1.000 | Al |
| O5  | 1.0000 | 0.06860 | 0.14059 | 0.61687 | Biso | 1.000 | O  |
| P3  | 1.0000 | 0.25598 | 0.26765 | 0.85407 | Biso | 1.000 | P  |
| O6  | 1.0000 | 0.36046 | 0.26567 | 0.81976 | Biso | 1.000 | O  |
| O7  | 1.0000 | 0.23483 | 0.02785 | 0.15811 | Biso | 1.000 | O  |
| O8  | 1.0000 | 0.47273 | 0.18439 | 0.13151 | Biso | 1.000 | O  |
| Al4 | 1.0000 | 0.04917 | 0.40158 | 0.52683 | Biso | 1.000 | Al |
| O9  | 1.0000 | 0.15855 | 0.19267 | 0.79215 | Biso | 1.000 | O  |
| P4  | 1.0000 | 0.25622 | 0.49746 | 0.06652 | Biso | 1.000 | P  |
| Al5 | 1.0000 | 0.37276 | 0.06176 | 0.18585 | Biso | 1.000 | Al |

|      |        |         |         |         |      |       |    |
|------|--------|---------|---------|---------|------|-------|----|
| O10  | 1.0000 | 0.22425 | 0.37501 | 0.08183 | Biso | 1.000 | O  |
| O11  | 1.0000 | 0.01989 | 0.28306 | 0.73032 | Biso | 1.000 | O  |
| O12  | 1.0000 | 0.39584 | 0.08774 | 0.30057 | Biso | 1.000 | O  |
| O13  | 1.0000 | 0.12670 | 0.15689 | 0.45668 | Biso | 1.000 | O  |
| O14  | 1.0000 | 0.07405 | 0.45528 | 0.63653 | Biso | 1.000 | O  |
| P5   | 1.0000 | 0.37047 | 0.05799 | 0.39999 | Biso | 1.000 | P  |
| O15  | 1.0000 | 0.28169 | 0.08421 | 0.43527 | Biso | 1.000 | O  |
| O16  | 1.0000 | 0.38911 | 0.30675 | 0.09208 | Biso | 1.000 | O  |
| P6   | 1.0000 | 0.04249 | 0.40482 | 0.73112 | Biso | 1.000 | P  |
| AI6  | 1.0000 | 0.48563 | 0.27861 | 0.86046 | Biso | 1.000 | AI |
| O17  | 1.0000 | 0.15023 | 0.14997 | 0.12330 | Biso | 1.000 | O  |
| AI7  | 1.0000 | 0.93496 | 0.60863 | 0.40126 | Biso | 1.000 | AI |
| P7   | 1.0000 | 0.71566 | 0.50729 | 0.85468 | Biso | 1.000 | P  |
| AI8  | 1.0000 | 0.58338 | 0.93310 | 0.73161 | Biso | 1.000 | AI |
| O18  | 1.0000 | 0.73293 | 0.62438 | 0.83420 | Biso | 1.000 | O  |
| O19  | 1.0000 | 0.95694 | 0.72959 | 0.16041 | Biso | 1.000 | O  |
| O20  | 1.0000 | 0.81662 | 0.82059 | 0.12133 | Biso | 1.000 | O  |
| O21  | 1.0000 | 0.56416 | 0.88160 | 0.62137 | Biso | 1.000 | O  |
| O22  | 1.0000 | 0.84850 | 0.85337 | 0.47545 | Biso | 1.000 | O  |
| O23  | 1.0000 | 0.91651 | 0.58980 | 0.28517 | Biso | 1.000 | O  |
| P8   | 1.0000 | 0.59011 | 0.93213 | 0.52614 | Biso | 1.000 | P  |
| O24  | 1.0000 | 0.68772 | 0.92420 | 0.48448 | Biso | 1.000 | O  |
| O25  | 1.0000 | 0.57533 | 0.70385 | 0.82426 | Biso | 1.000 | O  |
| O26  | 1.0000 | 0.80718 | 0.84446 | 0.78302 | Biso | 1.000 | O  |
| P9   | 1.0000 | 0.93002 | 0.60959 | 0.18383 | Biso | 1.000 | P  |
| AI9  | 1.0000 | 0.48031 | 0.71872 | 0.06389 | Biso | 1.000 | AI |
| Si1  | 1.0000 | 0.92068 | 0.82565 | 0.40476 | Biso | 1.000 | Si |
| O27  | 1.0000 | 0.92028 | 0.71508 | 0.44797 | Biso | 1.000 | O  |
| O28  | 1.0000 | 0.68795 | 0.61856 | 0.07019 | Biso | 1.000 | O  |
| O29  | 1.0000 | 0.48602 | 0.86336 | 0.46844 | Biso | 1.000 | O  |
| AI10 | 1.0000 | 0.71311 | 0.73863 | 0.85546 | Biso | 1.000 | AI |
| O30  | 1.0000 | 0.81529 | 0.93529 | 0.63803 | Biso | 1.000 | O  |
| O31  | 1.0000 | 0.82039 | 0.52224 | 0.13775 | Biso | 1.000 | O  |
| P10  | 1.0000 | 0.81673 | 0.95087 | 0.73932 | Biso | 1.000 | P  |
| AI11 | 1.0000 | 0.91538 | 0.82605 | 0.19952 | Biso | 1.000 | AI |
| AI12 | 1.0000 | 0.82104 | 0.95064 | 0.52017 | Biso | 1.000 | AI |
| O32  | 1.0000 | 0.86234 | 0.79462 | 0.30635 | Biso | 1.000 | O  |
| O33  | 1.0000 | 0.83139 | 0.48199 | 0.45050 | Biso | 1.000 | O  |
| O34  | 1.0000 | 0.48470 | 0.82413 | 0.79822 | Biso | 1.000 | O  |
| P11  | 1.0000 | 0.71513 | 0.74197 | 0.06496 | Biso | 1.000 | P  |
| O35  | 1.0000 | 0.61264 | 0.74754 | 0.10008 | Biso | 1.000 | O  |
| O36  | 1.0000 | 0.71901 | 0.96869 | 0.76902 | Biso | 1.000 | O  |
| O37  | 1.0000 | 0.81717 | 0.42586 | 0.61119 | Biso | 1.000 | O  |
| O38  | 1.0000 | 0.47954 | 0.13205 | 0.45150 | Biso | 1.000 | O  |



|      |        |         |         |         |      |       |    |
|------|--------|---------|---------|---------|------|-------|----|
| O39  | 1.0000 | 0.62244 | 0.05690 | 0.53190 | Biso | 1.000 | O  |
| P12  | 1.0000 | 0.81577 | 0.38771 | 0.51356 | Biso | 1.000 | P  |
| O40  | 1.0000 | 0.70168 | 0.28514 | 0.49143 | Biso | 1.000 | O  |
| O41  | 1.0000 | 0.58892 | 0.42086 | 0.84469 | Biso | 1.000 | O  |
| O42  | 1.0000 | 0.51389 | 0.18734 | 0.79982 | Biso | 1.000 | O  |
| AI13 | 1.0000 | 0.71822 | 0.50887 | 0.06175 | Biso | 1.000 | AI |
| O43  | 1.0000 | 0.92254 | 0.09202 | 0.49564 | Biso | 1.000 | O  |
| AI14 | 1.0000 | 0.81124 | 0.39123 | 0.72499 | Biso | 1.000 | AI |
| O44  | 1.0000 | 0.90859 | 0.35707 | 0.49932 | Biso | 1.000 | O  |
| P13  | 1.0000 | 0.58184 | 0.16550 | 0.72980 | Biso | 1.000 | P  |
| O45  | 1.0000 | 0.55888 | 0.04532 | 0.74282 | Biso | 1.000 | O  |
| AI15 | 1.0000 | 0.58502 | 0.16152 | 0.52767 | Biso | 1.000 | AI |
| O46  | 1.0000 | 0.92702 | 0.05208 | 0.77117 | Biso | 1.000 | O  |
| O47  | 1.0000 | 0.78319 | 0.48313 | 0.78567 | Biso | 1.000 | O  |
| P14  | 1.0000 | 0.48319 | 0.27946 | 0.07141 | Biso | 1.000 | P  |
| O48  | 1.0000 | 0.59680 | 0.38405 | 0.09018 | Biso | 1.000 | O  |
| O49  | 1.0000 | 0.70901 | 0.24852 | 0.74136 | Biso | 1.000 | O  |
| O50  | 1.0000 | 0.93708 | 0.40525 | 0.76443 | Biso | 1.000 | O  |
| O51  | 1.0000 | 0.54366 | 0.17947 | 0.63567 | Biso | 1.000 | O  |
| O52  | 1.0000 | 0.48377 | 0.75249 | 0.95055 | Biso | 1.000 | O  |
| O53  | 1.0000 | 0.75668 | 0.50232 | 0.94963 | Biso | 1.000 | O  |
| O54  | 1.0000 | 0.73871 | 0.78232 | 0.96679 | Biso | 1.000 | O  |
| P15  | 1.0000 | 0.37929 | 0.83994 | 0.18824 | Biso | 1.000 | P  |
| O55  | 1.0000 | 0.39585 | 0.95213 | 0.15293 | Biso | 1.000 | O  |
| AI16 | 1.0000 | 0.38001 | 0.83888 | 0.39286 | Biso | 1.000 | AI |
| P16  | 1.0000 | 0.47845 | 0.72523 | 0.85065 | Biso | 1.000 | P  |
| O56  | 1.0000 | 0.36786 | 0.62029 | 0.82501 | Biso | 1.000 | O  |
| O57  | 1.0000 | 0.25196 | 0.75412 | 0.19217 | Biso | 1.000 | O  |
| O58  | 1.0000 | 0.03044 | 0.96106 | 0.18665 | Biso | 1.000 | O  |
| O59  | 1.0000 | 0.19631 | 0.52970 | 0.13598 | Biso | 1.000 | O  |
| O60  | 1.0000 | 0.15016 | 0.50491 | 0.45799 | Biso | 1.000 | O  |
| O61  | 1.0000 | 0.02548 | 0.59159 | 0.14872 | Biso | 1.000 | O  |
| O62  | 1.0000 | 0.43123 | 0.85558 | 0.28253 | Biso | 1.000 | O  |
| O63  | 1.0000 | 0.13198 | 0.55907 | 0.30294 | Biso | 1.000 | O  |
| O64  | 1.0000 | 0.33002 | 0.93192 | 0.41443 | Biso | 1.000 | O  |
| P17  | 1.0000 | 0.15645 | 0.60014 | 0.40026 | Biso | 1.000 | P  |
| O65  | 1.0000 | 0.27554 | 0.70051 | 0.41038 | Biso | 1.000 | O  |
| O66  | 1.0000 | 0.38534 | 0.57298 | 0.07569 | Biso | 1.000 | O  |
| AI17 | 1.0000 | 0.24945 | 0.49849 | 0.86201 | Biso | 1.000 | AI |
| O67  | 1.0000 | 0.04989 | 0.92704 | 0.39790 | Biso | 1.000 | O  |
| O68  | 1.0000 | 0.43893 | 0.79953 | 0.12481 | Biso | 1.000 | O  |
| O69  | 1.0000 | 0.06957 | 0.63221 | 0.43225 | Biso | 1.000 | O  |
| AI18 | 1.0000 | 0.15113 | 0.60961 | 0.19321 | Biso | 1.000 | AI |
| O70  | 1.0000 | 0.22683 | 0.22128 | 0.94965 | Biso | 1.000 | O  |

|     |        |         |         |         |      |       |   |
|-----|--------|---------|---------|---------|------|-------|---|
| O71 | 1.0000 | 0.47544 | 0.24201 | 0.97323 | Biso | 1.000 | O |
| O72 | 1.0000 | 0.21744 | 0.51200 | 0.97303 | Biso | 1.000 | O |
| H1  | 1.0000 | 0.91041 | 0.71832 | 0.56282 | Biso | 1.000 | H |
| C1  | 1.0000 | 0.67680 | 0.59030 | 0.55708 | Biso | 1.000 | C |
| O73 | 1.0000 | 0.88130 | 0.70154 | 0.62538 | Biso | 1.000 | O |
| H2  | 1.0000 | 0.76669 | 0.64124 | 0.60335 | Biso | 1.000 | H |
| H3  | 1.0000 | 0.68611 | 0.52226 | 0.53077 | Biso | 1.000 | H |
| H4  | 1.0000 | 0.69371 | 0.65704 | 0.51045 | Biso | 1.000 | H |
| H5  | 1.0000 | 0.89358 | 0.77194 | 0.65042 | Biso | 1.000 | H |
| C2  | 1.0000 | 0.33368 | 0.42958 | 0.62702 | Biso | 1.000 | C |
| H6  | 1.0000 | 0.35145 | 0.37438 | 0.66694 | Biso | 1.000 | H |
| H7  | 1.0000 | 0.35408 | 0.50419 | 0.66579 | Biso | 1.000 | H |
| H8  | 1.0000 | 0.24403 | 0.38587 | 0.61425 | Biso | 1.000 | H |
| C3  | 1.0000 | 0.56646 | 0.53694 | 0.28562 | Biso | 1.000 | C |
| C4  | 1.0000 | 0.47468 | 0.40722 | 0.41652 | Biso | 1.000 | C |
| H9  | 1.0000 | 0.49350 | 0.34751 | 0.38557 | Biso | 1.000 | H |
| C5  | 1.0000 | 0.42014 | 0.38201 | 0.49803 | Biso | 1.000 | C |
| H10 | 1.0000 | 0.39592 | 0.30245 | 0.52984 | Biso | 1.000 | H |
| C6  | 1.0000 | 0.39680 | 0.45886 | 0.54052 | Biso | 1.000 | C |
| C7  | 1.0000 | 0.59722 | 0.56603 | 0.62173 | Biso | 1.000 | C |
| C8  | 1.0000 | 0.42628 | 0.55993 | 0.49633 | Biso | 1.000 | C |
| H11 | 1.0000 | 0.40677 | 0.61932 | 0.52705 | Biso | 1.000 | H |
| C9  | 1.0000 | 0.48087 | 0.58489 | 0.41487 | Biso | 1.000 | C |
| H12 | 1.0000 | 0.50519 | 0.66448 | 0.38310 | Biso | 1.000 | H |
| C10 | 1.0000 | 0.50700 | 0.50947 | 0.37373 | Biso | 1.000 | C |
| H13 | 1.0000 | 0.60169 | 0.48307 | 0.27230 | Biso | 1.000 | H |
| H14 | 1.0000 | 0.63389 | 0.62400 | 0.28381 | Biso | 1.000 | H |
| H15 | 1.0000 | 0.50867 | 0.52517 | 0.23133 | Biso | 1.000 | H |
| H16 | 1.0000 | 0.57514 | 0.62758 | 0.64296 | Biso | 1.000 | H |
| H17 | 1.0000 | 0.56561 | 0.49162 | 0.66259 | Biso | 1.000 | H |

TS-MS1/C3 in PX -based pathway

data\_image0

\_cell\_length\_a 13.8042  
 \_cell\_length\_b 13.8042  
 \_cell\_length\_c 15.044  
 \_cell\_angle\_alpha 90  
 \_cell\_angle\_beta 90  
 \_cell\_angle\_gamma 120

\_symmetry\_space\_group\_name\_H-M P 1

\_symmetry\_int\_tables\_number 1

loop\_

\_symmetry\_equiv\_pos\_as\_xyz  
 'x, y, z'

loop\_

\_atom\_site\_label  
 \_atom\_site\_occupancy  
 \_atom\_site\_fract\_x  
 \_atom\_site\_fract\_y  
 \_atom\_site\_fract\_z  
 \_atom\_site\_thermal\_displace\_type  
 \_atom\_site\_B\_iso\_or\_equiv  
 \_atom\_site\_type\_symbol

|     |        |         |         |         |      |       |    |
|-----|--------|---------|---------|---------|------|-------|----|
| P1  | 1.0000 | 0.05906 | 0.19490 | 0.52784 | Biso | 1.000 | P  |
| O1  | 1.0000 | 0.10131 | 0.32172 | 0.52049 | Biso | 1.000 | O  |
| O2  | 1.0000 | 0.31299 | 0.42281 | 0.86233 | Biso | 1.000 | O  |
| O3  | 1.0000 | 0.13745 | 0.46938 | 0.81119 | Biso | 1.000 | O  |
| Al1 | 1.0000 | 0.25386 | 0.28930 | 0.06874 | Biso | 1.000 | Al |
| O4  | 1.0000 | 0.18729 | 0.13462 | 0.29175 | Biso | 1.000 | O  |
| Al2 | 1.0000 | 0.04918 | 0.18811 | 0.73353 | Biso | 1.000 | Al |
| P2  | 1.0000 | 0.15698 | 0.08807 | 0.19597 | Biso | 1.000 | P  |
| Al3 | 1.0000 | 0.15753 | 0.07737 | 0.40162 | Biso | 1.000 | Al |
| O5  | 1.0000 | 0.07963 | 0.16642 | 0.62368 | Biso | 1.000 | O  |
| P3  | 1.0000 | 0.26387 | 0.29391 | 0.86510 | Biso | 1.000 | P  |
| O6  | 1.0000 | 0.35870 | 0.26875 | 0.84604 | Biso | 1.000 | O  |
| O7  | 1.0000 | 0.24439 | 0.05621 | 0.16206 | Biso | 1.000 | O  |
| O8  | 1.0000 | 0.48150 | 0.21491 | 0.14893 | Biso | 1.000 | O  |
| Al4 | 1.0000 | 0.06928 | 0.42840 | 0.53685 | Biso | 1.000 | Al |
| O9  | 1.0000 | 0.17336 | 0.23588 | 0.79375 | Biso | 1.000 | O  |
| P4  | 1.0000 | 0.27085 | 0.52665 | 0.07598 | Biso | 1.000 | P  |
| Al5 | 1.0000 | 0.37971 | 0.08627 | 0.19479 | Biso | 1.000 | Al |

|      |        |         |         |         |      |       |    |
|------|--------|---------|---------|---------|------|-------|----|
| O10  | 1.0000 | 0.24555 | 0.40781 | 0.09929 | Biso | 1.000 | O  |
| O11  | 1.0000 | 0.00402 | 0.28826 | 0.73200 | Biso | 1.000 | O  |
| O12  | 1.0000 | 0.39576 | 0.09770 | 0.31065 | Biso | 1.000 | O  |
| O13  | 1.0000 | 0.12806 | 0.16874 | 0.46254 | Biso | 1.000 | O  |
| O14  | 1.0000 | 0.09547 | 0.47357 | 0.64921 | Biso | 1.000 | O  |
| P5   | 1.0000 | 0.38417 | 0.08765 | 0.41264 | Biso | 1.000 | P  |
| O15  | 1.0000 | 0.28830 | 0.10418 | 0.44590 | Biso | 1.000 | O  |
| O16  | 1.0000 | 0.39472 | 0.32505 | 0.08524 | Biso | 1.000 | O  |
| P6   | 1.0000 | 0.04613 | 0.41554 | 0.73976 | Biso | 1.000 | P  |
| AI6  | 1.0000 | 0.49089 | 0.28644 | 0.87169 | Biso | 1.000 | AI |
| O17  | 1.0000 | 0.15989 | 0.18069 | 0.13641 | Biso | 1.000 | O  |
| AI7  | 1.0000 | 0.93480 | 0.62672 | 0.40715 | Biso | 1.000 | AI |
| P7   | 1.0000 | 0.71626 | 0.52457 | 0.85882 | Biso | 1.000 | P  |
| AI8  | 1.0000 | 0.59829 | 0.95785 | 0.73418 | Biso | 1.000 | AI |
| O18  | 1.0000 | 0.71571 | 0.63207 | 0.83300 | Biso | 1.000 | O  |
| O19  | 1.0000 | 0.96417 | 0.75451 | 0.16862 | Biso | 1.000 | O  |
| O20  | 1.0000 | 0.82375 | 0.84873 | 0.12569 | Biso | 1.000 | O  |
| O21  | 1.0000 | 0.58046 | 0.90543 | 0.62451 | Biso | 1.000 | O  |
| O22  | 1.0000 | 0.86616 | 0.89089 | 0.47672 | Biso | 1.000 | O  |
| O23  | 1.0000 | 0.91913 | 0.60803 | 0.28995 | Biso | 1.000 | O  |
| P8   | 1.0000 | 0.59604 | 0.94917 | 0.52767 | Biso | 1.000 | P  |
| O24  | 1.0000 | 0.70328 | 0.96041 | 0.48667 | Biso | 1.000 | O  |
| O25  | 1.0000 | 0.57502 | 0.72824 | 0.84871 | Biso | 1.000 | O  |
| O26  | 1.0000 | 0.80443 | 0.85642 | 0.78134 | Biso | 1.000 | O  |
| P9   | 1.0000 | 0.93683 | 0.63367 | 0.18949 | Biso | 1.000 | P  |
| AI9  | 1.0000 | 0.48843 | 0.75334 | 0.06497 | Biso | 1.000 | AI |
| Si1  | 1.0000 | 0.92665 | 0.84695 | 0.40831 | Biso | 1.000 | Si |
| O27  | 1.0000 | 0.90791 | 0.72748 | 0.44734 | Biso | 1.000 | O  |
| O28  | 1.0000 | 0.69129 | 0.64522 | 0.08391 | Biso | 1.000 | O  |
| O29  | 1.0000 | 0.49587 | 0.86331 | 0.47138 | Biso | 1.000 | O  |
| AI10 | 1.0000 | 0.71414 | 0.75504 | 0.85801 | Biso | 1.000 | AI |
| O30  | 1.0000 | 0.82833 | 0.96567 | 0.64220 | Biso | 1.000 | O  |
| O31  | 1.0000 | 0.82962 | 0.54874 | 0.13925 | Biso | 1.000 | O  |
| P10  | 1.0000 | 0.82658 | 0.97036 | 0.74384 | Biso | 1.000 | P  |
| AI11 | 1.0000 | 0.92309 | 0.85292 | 0.20345 | Biso | 1.000 | AI |
| AI12 | 1.0000 | 0.83438 | 0.98264 | 0.52508 | Biso | 1.000 | AI |
| O32  | 1.0000 | 0.86823 | 0.82515 | 0.30939 | Biso | 1.000 | O  |
| O33  | 1.0000 | 0.83795 | 0.49545 | 0.45443 | Biso | 1.000 | O  |
| O34  | 1.0000 | 0.49403 | 0.85019 | 0.79845 | Biso | 1.000 | O  |
| P11  | 1.0000 | 0.72782 | 0.76987 | 0.06447 | Biso | 1.000 | P  |
| O35  | 1.0000 | 0.62690 | 0.78667 | 0.08267 | Biso | 1.000 | O  |
| O36  | 1.0000 | 0.73264 | 0.99370 | 0.77538 | Biso | 1.000 | O  |
| O37  | 1.0000 | 0.82620 | 0.44426 | 0.61679 | Biso | 1.000 | O  |
| O38  | 1.0000 | 0.49432 | 0.18069 | 0.45420 | Biso | 1.000 | O  |

|      |        |         |         |         |      |       |    |
|------|--------|---------|---------|---------|------|-------|----|
| O39  | 1.0000 | 0.60154 | 0.06361 | 0.52653 | Biso | 1.000 | O  |
| P12  | 1.0000 | 0.83017 | 0.40663 | 0.52040 | Biso | 1.000 | P  |
| O40  | 1.0000 | 0.72267 | 0.29648 | 0.49844 | Biso | 1.000 | O  |
| O41  | 1.0000 | 0.59481 | 0.42562 | 0.84896 | Biso | 1.000 | O  |
| O42  | 1.0000 | 0.50858 | 0.19391 | 0.80258 | Biso | 1.000 | O  |
| AI13 | 1.0000 | 0.72300 | 0.53632 | 0.06831 | Biso | 1.000 | AI |
| O43  | 1.0000 | 0.93241 | 0.12777 | 0.50565 | Biso | 1.000 | O  |
| AI14 | 1.0000 | 0.82008 | 0.41789 | 0.73214 | Biso | 1.000 | AI |
| O44  | 1.0000 | 0.93007 | 0.38605 | 0.50871 | Biso | 1.000 | O  |
| P13  | 1.0000 | 0.58985 | 0.18889 | 0.73475 | Biso | 1.000 | P  |
| O45  | 1.0000 | 0.57789 | 0.07243 | 0.74135 | Biso | 1.000 | O  |
| AI15 | 1.0000 | 0.59285 | 0.18590 | 0.53074 | Biso | 1.000 | AI |
| O46  | 1.0000 | 0.94054 | 0.06343 | 0.78007 | Biso | 1.000 | O  |
| O47  | 1.0000 | 0.79620 | 0.51055 | 0.79578 | Biso | 1.000 | O  |
| P14  | 1.0000 | 0.49348 | 0.30176 | 0.07891 | Biso | 1.000 | P  |
| O48  | 1.0000 | 0.60185 | 0.41183 | 0.09907 | Biso | 1.000 | O  |
| O49  | 1.0000 | 0.71240 | 0.27907 | 0.75566 | Biso | 1.000 | O  |
| O50  | 1.0000 | 0.94796 | 0.43183 | 0.76804 | Biso | 1.000 | O  |
| O51  | 1.0000 | 0.55750 | 0.20732 | 0.63978 | Biso | 1.000 | O  |
| O52  | 1.0000 | 0.46641 | 0.78195 | 0.95514 | Biso | 1.000 | O  |
| O53  | 1.0000 | 0.75778 | 0.53144 | 0.95577 | Biso | 1.000 | O  |
| O54  | 1.0000 | 0.76557 | 0.79951 | 0.96654 | Biso | 1.000 | O  |
| P15  | 1.0000 | 0.38970 | 0.86917 | 0.19714 | Biso | 1.000 | P  |
| O55  | 1.0000 | 0.40386 | 0.97864 | 0.15746 | Biso | 1.000 | O  |
| AI16 | 1.0000 | 0.39285 | 0.86731 | 0.40502 | Biso | 1.000 | AI |
| P16  | 1.0000 | 0.47693 | 0.75208 | 0.85758 | Biso | 1.000 | P  |
| O56  | 1.0000 | 0.36774 | 0.64748 | 0.82708 | Biso | 1.000 | O  |
| O57  | 1.0000 | 0.26337 | 0.78002 | 0.19941 | Biso | 1.000 | O  |
| O58  | 1.0000 | 0.03945 | 0.98687 | 0.18906 | Biso | 1.000 | O  |
| O59  | 1.0000 | 0.20601 | 0.55796 | 0.14169 | Biso | 1.000 | O  |
| O60  | 1.0000 | 0.16450 | 0.53835 | 0.46813 | Biso | 1.000 | O  |
| O61  | 1.0000 | 0.03469 | 0.61833 | 0.15576 | Biso | 1.000 | O  |
| O62  | 1.0000 | 0.43816 | 0.88947 | 0.29283 | Biso | 1.000 | O  |
| O63  | 1.0000 | 0.14143 | 0.58428 | 0.31087 | Biso | 1.000 | O  |
| O64  | 1.0000 | 0.36266 | 0.97040 | 0.44207 | Biso | 1.000 | O  |
| P17  | 1.0000 | 0.16211 | 0.62811 | 0.40793 | Biso | 1.000 | P  |
| O65  | 1.0000 | 0.27832 | 0.73304 | 0.41511 | Biso | 1.000 | O  |
| O66  | 1.0000 | 0.39922 | 0.60789 | 0.08617 | Biso | 1.000 | O  |
| AI17 | 1.0000 | 0.26270 | 0.51849 | 0.86887 | Biso | 1.000 | AI |
| O67  | 1.0000 | 0.06110 | 0.93697 | 0.40050 | Biso | 1.000 | O  |
| O68  | 1.0000 | 0.45622 | 0.83045 | 0.13962 | Biso | 1.000 | O  |
| O69  | 1.0000 | 0.07154 | 0.65506 | 0.43838 | Biso | 1.000 | O  |
| AI18 | 1.0000 | 0.15996 | 0.63622 | 0.20075 | Biso | 1.000 | AI |
| O70  | 1.0000 | 0.21149 | 0.24835 | 0.95764 | Biso | 1.000 | O  |

|     |        |         |         |         |      |       |   |
|-----|--------|---------|---------|---------|------|-------|---|
| O71 | 1.0000 | 0.49735 | 0.25677 | 0.98514 | Biso | 1.000 | O |
| O72 | 1.0000 | 0.23224 | 0.53251 | 0.98063 | Biso | 1.000 | O |
| H1  | 1.0000 | 0.83320 | 0.69889 | 0.56866 | Biso | 1.000 | H |
| C1  | 1.0000 | 0.49115 | 0.52468 | 0.67752 | Biso | 1.000 | C |
| H2  | 1.0000 | 0.48852 | 0.49143 | 0.74347 | Biso | 1.000 | H |
| H3  | 1.0000 | 0.56832 | 0.60484 | 0.67134 | Biso | 1.000 | H |
| H4  | 1.0000 | 0.42043 | 0.53904 | 0.67116 | Biso | 1.000 | H |
| C2  | 1.0000 | 0.58201 | 0.72533 | 0.29823 | Biso | 1.000 | C |
| C3  | 1.0000 | 0.61986 | 0.59378 | 0.38935 | Biso | 1.000 | C |
| H5  | 1.0000 | 0.69808 | 0.62478 | 0.35397 | Biso | 1.000 | H |
| C4  | 1.0000 | 0.59856 | 0.53231 | 0.46549 | Biso | 1.000 | C |
| H6  | 1.0000 | 0.66042 | 0.51291 | 0.49034 | Biso | 1.000 | H |
| C5  | 1.0000 | 0.49872 | 0.49682 | 0.51608 | Biso | 1.000 | C |
| C6  | 1.0000 | 0.48611 | 0.44264 | 0.60559 | Biso | 1.000 | C |
| C7  | 1.0000 | 0.41847 | 0.51939 | 0.48392 | Biso | 1.000 | C |
| H7  | 1.0000 | 0.34095 | 0.49304 | 0.51908 | Biso | 1.000 | H |
| C8  | 1.0000 | 0.43884 | 0.58388 | 0.40574 | Biso | 1.000 | C |
| H8  | 1.0000 | 0.38450 | 0.61699 | 0.39033 | Biso | 1.000 | H |
| C9  | 1.0000 | 0.54212 | 0.62657 | 0.35868 | Biso | 1.000 | C |
| H9  | 1.0000 | 0.63252 | 0.72159 | 0.24462 | Biso | 1.000 | H |
| H10 | 1.0000 | 0.63552 | 0.80044 | 0.33714 | Biso | 1.000 | H |
| H11 | 1.0000 | 0.51325 | 0.73356 | 0.27171 | Biso | 1.000 | H |
| H12 | 1.0000 | 0.55812 | 0.43079 | 0.61503 | Biso | 1.000 | H |
| C10 | 1.0000 | 0.42154 | 0.49411 | 0.30018 | Biso | 1.000 | C |
| H13 | 1.0000 | 0.46641 | 0.52535 | 0.23790 | Biso | 1.000 | H |
| H14 | 1.0000 | 0.42580 | 0.42361 | 0.32707 | Biso | 1.000 | H |
| H15 | 1.0000 | 0.33670 | 0.47891 | 0.29308 | Biso | 1.000 | H |
| C11 | 1.0000 | 0.37878 | 0.32823 | 0.61141 | Biso | 1.000 | C |
| O73 | 1.0000 | 0.78949 | 0.66739 | 0.62273 | Biso | 1.000 | O |
| H16 | 1.0000 | 0.37708 | 0.28637 | 0.67320 | Biso | 1.000 | H |
| H17 | 1.0000 | 0.30478 | 0.33736 | 0.61009 | Biso | 1.000 | H |
| H18 | 1.0000 | 0.37277 | 0.27404 | 0.55651 | Biso | 1.000 | H |
| H19 | 1.0000 | 0.82097 | 0.72894 | 0.66462 | Biso | 1.000 | H |

TS-MS2/C3 in PX -based pathway

data\_image0

\_cell\_length\_a 13.8042  
 \_cell\_length\_b 13.8042  
 \_cell\_length\_c 15.044  
 \_cell\_angle\_alpha 90  
 \_cell\_angle\_beta 90  
 \_cell\_angle\_gamma 120

\_symmetry\_space\_group\_name\_H-M P 1

\_symmetry\_int\_tables\_number 1

loop\_

\_symmetry\_equiv\_pos\_as\_xyz  
 'x, y, z'

loop\_

\_atom\_site\_label  
 \_atom\_site\_occupancy  
 \_atom\_site\_fract\_x  
 \_atom\_site\_fract\_y  
 \_atom\_site\_fract\_z  
 \_atom\_site\_thermal\_displace\_type  
 \_atom\_site\_B\_iso\_or\_equiv  
 \_atom\_site\_type\_symbol

|     |        |         |         |         |      |       |    |
|-----|--------|---------|---------|---------|------|-------|----|
| P1  | 1.0000 | 0.05279 | 0.18932 | 0.52788 | Biso | 1.000 | P  |
| O1  | 1.0000 | 0.09653 | 0.31653 | 0.51831 | Biso | 1.000 | O  |
| O2  | 1.0000 | 0.30837 | 0.41566 | 0.86156 | Biso | 1.000 | O  |
| O3  | 1.0000 | 0.13351 | 0.46388 | 0.81091 | Biso | 1.000 | O  |
| Al1 | 1.0000 | 0.25182 | 0.28586 | 0.06847 | Biso | 1.000 | Al |
| O4  | 1.0000 | 0.18047 | 0.13142 | 0.29359 | Biso | 1.000 | O  |
| Al2 | 1.0000 | 0.04255 | 0.18189 | 0.73463 | Biso | 1.000 | Al |
| P2  | 1.0000 | 0.15066 | 0.08505 | 0.19756 | Biso | 1.000 | P  |
| Al3 | 1.0000 | 0.15232 | 0.07094 | 0.40237 | Biso | 1.000 | Al |
| O5  | 1.0000 | 0.07310 | 0.16237 | 0.62413 | Biso | 1.000 | O  |
| P3  | 1.0000 | 0.25828 | 0.28667 | 0.86520 | Biso | 1.000 | P  |
| O6  | 1.0000 | 0.35229 | 0.26020 | 0.84607 | Biso | 1.000 | O  |
| O7  | 1.0000 | 0.23612 | 0.04999 | 0.16462 | Biso | 1.000 | O  |
| O8  | 1.0000 | 0.47504 | 0.20893 | 0.14833 | Biso | 1.000 | O  |
| Al4 | 1.0000 | 0.06514 | 0.42397 | 0.53593 | Biso | 1.000 | Al |
| O9  | 1.0000 | 0.16697 | 0.22880 | 0.79427 | Biso | 1.000 | O  |
| P4  | 1.0000 | 0.26547 | 0.52204 | 0.07667 | Biso | 1.000 | P  |
| Al5 | 1.0000 | 0.37262 | 0.08138 | 0.19486 | Biso | 1.000 | Al |

|      |        |         |         |         |      |       |    |
|------|--------|---------|---------|---------|------|-------|----|
| O10  | 1.0000 | 0.24553 | 0.40497 | 0.09933 | Biso | 1.000 | O  |
| O11  | 1.0000 | 0.99763 | 0.28213 | 0.73383 | Biso | 1.000 | O  |
| O12  | 1.0000 | 0.39122 | 0.09575 | 0.31037 | Biso | 1.000 | O  |
| O13  | 1.0000 | 0.12247 | 0.16210 | 0.46387 | Biso | 1.000 | O  |
| O14  | 1.0000 | 0.09063 | 0.46586 | 0.64886 | Biso | 1.000 | O  |
| P5   | 1.0000 | 0.38003 | 0.08391 | 0.41221 | Biso | 1.000 | P  |
| O15  | 1.0000 | 0.28420 | 0.10032 | 0.44621 | Biso | 1.000 | O  |
| O16  | 1.0000 | 0.39290 | 0.32132 | 0.08158 | Biso | 1.000 | O  |
| P6   | 1.0000 | 0.04146 | 0.40981 | 0.74010 | Biso | 1.000 | P  |
| AI6  | 1.0000 | 0.48545 | 0.27915 | 0.87093 | Biso | 1.000 | AI |
| O17  | 1.0000 | 0.15819 | 0.17972 | 0.13814 | Biso | 1.000 | O  |
| AI7  | 1.0000 | 0.92678 | 0.61983 | 0.40642 | Biso | 1.000 | AI |
| P7   | 1.0000 | 0.70989 | 0.51837 | 0.85730 | Biso | 1.000 | P  |
| AI8  | 1.0000 | 0.59202 | 0.95063 | 0.73353 | Biso | 1.000 | AI |
| O18  | 1.0000 | 0.70912 | 0.62534 | 0.82970 | Biso | 1.000 | O  |
| O19  | 1.0000 | 0.96096 | 0.75362 | 0.17227 | Biso | 1.000 | O  |
| O20  | 1.0000 | 0.81700 | 0.84203 | 0.12548 | Biso | 1.000 | O  |
| O21  | 1.0000 | 0.57399 | 0.89802 | 0.62378 | Biso | 1.000 | O  |
| O22  | 1.0000 | 0.86676 | 0.88846 | 0.47978 | Biso | 1.000 | O  |
| O23  | 1.0000 | 0.90946 | 0.60081 | 0.28947 | Biso | 1.000 | O  |
| P8   | 1.0000 | 0.58995 | 0.94165 | 0.52685 | Biso | 1.000 | P  |
| O24  | 1.0000 | 0.69651 | 0.95119 | 0.48557 | Biso | 1.000 | O  |
| O25  | 1.0000 | 0.57150 | 0.72476 | 0.85103 | Biso | 1.000 | O  |
| O26  | 1.0000 | 0.79827 | 0.84955 | 0.77879 | Biso | 1.000 | O  |
| P9   | 1.0000 | 0.93179 | 0.63157 | 0.18993 | Biso | 1.000 | P  |
| AI9  | 1.0000 | 0.48412 | 0.75091 | 0.06414 | Biso | 1.000 | AI |
| Si1  | 1.0000 | 0.92259 | 0.84238 | 0.40873 | Biso | 1.000 | Si |
| O27  | 1.0000 | 0.90179 | 0.72180 | 0.44676 | Biso | 1.000 | O  |
| O28  | 1.0000 | 0.68332 | 0.63895 | 0.08218 | Biso | 1.000 | O  |
| O29  | 1.0000 | 0.48891 | 0.85673 | 0.47073 | Biso | 1.000 | O  |
| AI10 | 1.0000 | 0.71009 | 0.74916 | 0.85725 | Biso | 1.000 | AI |
| O30  | 1.0000 | 0.82174 | 0.96282 | 0.64189 | Biso | 1.000 | O  |
| O31  | 1.0000 | 0.82679 | 0.54896 | 0.13643 | Biso | 1.000 | O  |
| P10  | 1.0000 | 0.82005 | 0.96436 | 0.74359 | Biso | 1.000 | P  |
| AI11 | 1.0000 | 0.91692 | 0.85052 | 0.20455 | Biso | 1.000 | AI |
| AI12 | 1.0000 | 0.82869 | 0.97722 | 0.52472 | Biso | 1.000 | AI |
| O32  | 1.0000 | 0.86248 | 0.82304 | 0.31078 | Biso | 1.000 | O  |
| O33  | 1.0000 | 0.82988 | 0.48954 | 0.45512 | Biso | 1.000 | O  |
| O34  | 1.0000 | 0.48784 | 0.84330 | 0.79787 | Biso | 1.000 | O  |
| P11  | 1.0000 | 0.72321 | 0.76423 | 0.06208 | Biso | 1.000 | P  |
| O35  | 1.0000 | 0.62313 | 0.78344 | 0.07540 | Biso | 1.000 | O  |
| O36  | 1.0000 | 0.72578 | 0.98648 | 0.77625 | Biso | 1.000 | O  |
| O37  | 1.0000 | 0.82087 | 0.43632 | 0.61657 | Biso | 1.000 | O  |
| O38  | 1.0000 | 0.49041 | 0.17590 | 0.45416 | Biso | 1.000 | O  |



|      |        |         |         |         |      |       |    |
|------|--------|---------|---------|---------|------|-------|----|
| O39  | 1.0000 | 0.59742 | 0.05699 | 0.52585 | Biso | 1.000 | O  |
| P12  | 1.0000 | 0.82527 | 0.40085 | 0.51961 | Biso | 1.000 | P  |
| O40  | 1.0000 | 0.71985 | 0.28910 | 0.49706 | Biso | 1.000 | O  |
| O41  | 1.0000 | 0.58821 | 0.41908 | 0.84876 | Biso | 1.000 | O  |
| O42  | 1.0000 | 0.50443 | 0.18814 | 0.80089 | Biso | 1.000 | O  |
| AI13 | 1.0000 | 0.71758 | 0.53184 | 0.06671 | Biso | 1.000 | AI |
| O43  | 1.0000 | 0.92640 | 0.12286 | 0.50526 | Biso | 1.000 | O  |
| AI14 | 1.0000 | 0.81507 | 0.41092 | 0.73198 | Biso | 1.000 | AI |
| O44  | 1.0000 | 0.92725 | 0.38384 | 0.50641 | Biso | 1.000 | O  |
| P13  | 1.0000 | 0.58569 | 0.18250 | 0.73348 | Biso | 1.000 | P  |
| O45  | 1.0000 | 0.57164 | 0.06519 | 0.73969 | Biso | 1.000 | O  |
| AI15 | 1.0000 | 0.58940 | 0.17976 | 0.52955 | Biso | 1.000 | AI |
| O46  | 1.0000 | 0.93384 | 0.05689 | 0.78058 | Biso | 1.000 | O  |
| O47  | 1.0000 | 0.78933 | 0.50273 | 0.79484 | Biso | 1.000 | O  |
| P14  | 1.0000 | 0.48997 | 0.29547 | 0.07704 | Biso | 1.000 | P  |
| O48  | 1.0000 | 0.60000 | 0.40397 | 0.09672 | Biso | 1.000 | O  |
| O49  | 1.0000 | 0.70870 | 0.27115 | 0.75490 | Biso | 1.000 | O  |
| O50  | 1.0000 | 0.94443 | 0.42815 | 0.76777 | Biso | 1.000 | O  |
| O51  | 1.0000 | 0.55484 | 0.20234 | 0.63840 | Biso | 1.000 | O  |
| O52  | 1.0000 | 0.45598 | 0.77340 | 0.95419 | Biso | 1.000 | O  |
| O53  | 1.0000 | 0.75253 | 0.52772 | 0.95405 | Biso | 1.000 | O  |
| O54  | 1.0000 | 0.76609 | 0.79326 | 0.96494 | Biso | 1.000 | O  |
| P15  | 1.0000 | 0.38760 | 0.86579 | 0.19507 | Biso | 1.000 | P  |
| O55  | 1.0000 | 0.39485 | 0.97313 | 0.15737 | Biso | 1.000 | O  |
| AI16 | 1.0000 | 0.38749 | 0.86262 | 0.40341 | Biso | 1.000 | AI |
| P16  | 1.0000 | 0.47115 | 0.74550 | 0.85725 | Biso | 1.000 | P  |
| O56  | 1.0000 | 0.36425 | 0.63977 | 0.82466 | Biso | 1.000 | O  |
| O57  | 1.0000 | 0.26361 | 0.77088 | 0.19457 | Biso | 1.000 | O  |
| O58  | 1.0000 | 0.03153 | 0.98626 | 0.18988 | Biso | 1.000 | O  |
| O59  | 1.0000 | 0.19142 | 0.54492 | 0.13930 | Biso | 1.000 | O  |
| O60  | 1.0000 | 0.16106 | 0.53442 | 0.46748 | Biso | 1.000 | O  |
| O61  | 1.0000 | 0.03077 | 0.61766 | 0.15733 | Biso | 1.000 | O  |
| O62  | 1.0000 | 0.43383 | 0.88561 | 0.29154 | Biso | 1.000 | O  |
| O63  | 1.0000 | 0.13679 | 0.57899 | 0.30993 | Biso | 1.000 | O  |
| O64  | 1.0000 | 0.35821 | 0.96633 | 0.44056 | Biso | 1.000 | O  |
| P17  | 1.0000 | 0.15599 | 0.62284 | 0.40690 | Biso | 1.000 | P  |
| O65  | 1.0000 | 0.27051 | 0.72989 | 0.41416 | Biso | 1.000 | O  |
| O66  | 1.0000 | 0.39158 | 0.60820 | 0.09159 | Biso | 1.000 | O  |
| AI17 | 1.0000 | 0.25902 | 0.51210 | 0.86827 | Biso | 1.000 | AI |
| O67  | 1.0000 | 0.05764 | 0.93019 | 0.39915 | Biso | 1.000 | O  |
| O68  | 1.0000 | 0.46108 | 0.83651 | 0.13692 | Biso | 1.000 | O  |
| O69  | 1.0000 | 0.06291 | 0.64594 | 0.43730 | Biso | 1.000 | O  |
| AI18 | 1.0000 | 0.15474 | 0.62988 | 0.19941 | Biso | 1.000 | AI |
| O70  | 1.0000 | 0.20633 | 0.24267 | 0.95810 | Biso | 1.000 | O  |

|     |        |         |         |         |      |       |   |
|-----|--------|---------|---------|---------|------|-------|---|
| O71 | 1.0000 | 0.49293 | 0.24811 | 0.98393 | Biso | 1.000 | O |
| O72 | 1.0000 | 0.23092 | 0.52809 | 0.97994 | Biso | 1.000 | O |
| H1  | 1.0000 | 0.83041 | 0.69603 | 0.56997 | Biso | 1.000 | H |
| C1  | 1.0000 | 0.48239 | 0.51738 | 0.67591 | Biso | 1.000 | C |
| H2  | 1.0000 | 0.47699 | 0.48378 | 0.74220 | Biso | 1.000 | H |
| H3  | 1.0000 | 0.55979 | 0.59755 | 0.67107 | Biso | 1.000 | H |
| H4  | 1.0000 | 0.41196 | 0.53198 | 0.66763 | Biso | 1.000 | H |
| C2  | 1.0000 | 0.56749 | 0.71580 | 0.29078 | Biso | 1.000 | C |
| C3  | 1.0000 | 0.61546 | 0.59997 | 0.39206 | Biso | 1.000 | C |
| H5  | 1.0000 | 0.69617 | 0.63504 | 0.35990 | Biso | 1.000 | H |
| C4  | 1.0000 | 0.59383 | 0.53161 | 0.46779 | Biso | 1.000 | C |
| H6  | 1.0000 | 0.65921 | 0.51704 | 0.49198 | Biso | 1.000 | H |
| C5  | 1.0000 | 0.49532 | 0.48978 | 0.51511 | Biso | 1.000 | C |
| C6  | 1.0000 | 0.47998 | 0.43560 | 0.60492 | Biso | 1.000 | C |
| C7  | 1.0000 | 0.41130 | 0.51111 | 0.48071 | Biso | 1.000 | C |
| H7  | 1.0000 | 0.33792 | 0.49087 | 0.51988 | Biso | 1.000 | H |
| C8  | 1.0000 | 0.43431 | 0.58220 | 0.40528 | Biso | 1.000 | C |
| H8  | 1.0000 | 0.37722 | 0.61212 | 0.39050 | Biso | 1.000 | H |
| C9  | 1.0000 | 0.54002 | 0.63059 | 0.36203 | Biso | 1.000 | C |
| H9  | 1.0000 | 0.62946 | 0.71772 | 0.24543 | Biso | 1.000 | H |
| H10 | 1.0000 | 0.60244 | 0.79933 | 0.31994 | Biso | 1.000 | H |
| H11 | 1.0000 | 0.49277 | 0.69873 | 0.25393 | Biso | 1.000 | H |
| H12 | 1.0000 | 0.55239 | 0.42482 | 0.61586 | Biso | 1.000 | H |
| C10 | 1.0000 | 0.34512 | 0.42531 | 0.37460 | Biso | 1.000 | C |
| H13 | 1.0000 | 0.40573 | 0.40316 | 0.35153 | Biso | 1.000 | H |
| H14 | 1.0000 | 0.27876 | 0.36162 | 0.41508 | Biso | 1.000 | H |
| H15 | 1.0000 | 0.30774 | 0.44925 | 0.32150 | Biso | 1.000 | H |
| C11 | 1.0000 | 0.37321 | 0.32086 | 0.61046 | Biso | 1.000 | C |
| O73 | 1.0000 | 0.78730 | 0.66421 | 0.62422 | Biso | 1.000 | O |
| H16 | 1.0000 | 0.37036 | 0.27993 | 0.67303 | Biso | 1.000 | H |
| H17 | 1.0000 | 0.29853 | 0.32885 | 0.60760 | Biso | 1.000 | H |
| H18 | 1.0000 | 0.36887 | 0.26599 | 0.55673 | Biso | 1.000 | H |
| H19 | 1.0000 | 0.81643 | 0.72650 | 0.66536 | Biso | 1.000 | H |

TS-MS3/C3 in PX -based pathway

data\_image0

\_cell\_length\_a 13.8042  
 \_cell\_length\_b 13.8042  
 \_cell\_length\_c 15.044  
 \_cell\_angle\_alpha 90  
 \_cell\_angle\_beta 90  
 \_cell\_angle\_gamma 120

\_symmetry\_space\_group\_name\_H-M P 1

\_symmetry\_int\_tables\_number 1

loop\_

\_symmetry\_equiv\_pos\_as\_xyz  
 'x, y, z'

loop\_

\_atom\_site\_label  
 \_atom\_site\_occupancy  
 \_atom\_site\_fract\_x  
 \_atom\_site\_fract\_y  
 \_atom\_site\_fract\_z  
 \_atom\_site\_thermal\_displace\_type  
 \_atom\_site\_B\_iso\_or\_equiv  
 \_atom\_site\_type\_symbol

|     |        |         |         |         |      |       |    |
|-----|--------|---------|---------|---------|------|-------|----|
| P1  | 1.0000 | 0.05157 | 0.18647 | 0.52581 | Biso | 1.000 | P  |
| O1  | 1.0000 | 0.09320 | 0.31306 | 0.51494 | Biso | 1.000 | O  |
| O2  | 1.0000 | 0.30125 | 0.40603 | 0.83315 | Biso | 1.000 | O  |
| O3  | 1.0000 | 0.13754 | 0.47852 | 0.81005 | Biso | 1.000 | O  |
| Al1 | 1.0000 | 0.25234 | 0.28519 | 0.06766 | Biso | 1.000 | Al |
| O4  | 1.0000 | 0.17675 | 0.12688 | 0.28711 | Biso | 1.000 | O  |
| Al2 | 1.0000 | 0.04850 | 0.17927 | 0.73229 | Biso | 1.000 | Al |
| P2  | 1.0000 | 0.15320 | 0.07850 | 0.19145 | Biso | 1.000 | P  |
| Al3 | 1.0000 | 0.15260 | 0.07098 | 0.39739 | Biso | 1.000 | Al |
| O5  | 1.0000 | 0.08045 | 0.16435 | 0.62096 | Biso | 1.000 | O  |
| P3  | 1.0000 | 0.25762 | 0.28206 | 0.85997 | Biso | 1.000 | P  |
| O6  | 1.0000 | 0.35366 | 0.25642 | 0.85308 | Biso | 1.000 | O  |
| O7  | 1.0000 | 0.24332 | 0.04769 | 0.16390 | Biso | 1.000 | O  |
| O8  | 1.0000 | 0.47945 | 0.20857 | 0.14746 | Biso | 1.000 | O  |
| Al4 | 1.0000 | 0.05498 | 0.41484 | 0.53593 | Biso | 1.000 | Al |
| O9  | 1.0000 | 0.16501 | 0.20354 | 0.79555 | Biso | 1.000 | O  |
| P4  | 1.0000 | 0.26804 | 0.51528 | 0.07772 | Biso | 1.000 | P  |
| Al5 | 1.0000 | 0.37961 | 0.08159 | 0.19544 | Biso | 1.000 | Al |

|      |        |         |         |         |      |       |    |
|------|--------|---------|---------|---------|------|-------|----|
| O10  | 1.0000 | 0.24850 | 0.40152 | 0.11192 | Biso | 1.000 | O  |
| O11  | 1.0000 | 0.01566 | 0.28786 | 0.73878 | Biso | 1.000 | O  |
| O12  | 1.0000 | 0.39917 | 0.10031 | 0.31070 | Biso | 1.000 | O  |
| O13  | 1.0000 | 0.11608 | 0.15756 | 0.45798 | Biso | 1.000 | O  |
| O14  | 1.0000 | 0.09348 | 0.46529 | 0.64635 | Biso | 1.000 | O  |
| P5   | 1.0000 | 0.37578 | 0.07892 | 0.41109 | Biso | 1.000 | P  |
| O15  | 1.0000 | 0.28705 | 0.10835 | 0.44143 | Biso | 1.000 | O  |
| O16  | 1.0000 | 0.39127 | 0.31306 | 0.07526 | Biso | 1.000 | O  |
| P6   | 1.0000 | 0.04757 | 0.41285 | 0.73939 | Biso | 1.000 | P  |
| AI6  | 1.0000 | 0.48863 | 0.27834 | 0.87181 | Biso | 1.000 | AI |
| O17  | 1.0000 | 0.15756 | 0.16873 | 0.12825 | Biso | 1.000 | O  |
| AI7  | 1.0000 | 0.92966 | 0.62048 | 0.40053 | Biso | 1.000 | AI |
| P7   | 1.0000 | 0.70870 | 0.51598 | 0.85522 | Biso | 1.000 | P  |
| AI8  | 1.0000 | 0.59131 | 0.94627 | 0.73396 | Biso | 1.000 | AI |
| O18  | 1.0000 | 0.71008 | 0.62359 | 0.82631 | Biso | 1.000 | O  |
| O19  | 1.0000 | 0.95388 | 0.74111 | 0.16410 | Biso | 1.000 | O  |
| O20  | 1.0000 | 0.81804 | 0.84319 | 0.12602 | Biso | 1.000 | O  |
| O21  | 1.0000 | 0.56952 | 0.89606 | 0.62318 | Biso | 1.000 | O  |
| O22  | 1.0000 | 0.87202 | 0.88998 | 0.47255 | Biso | 1.000 | O  |
| O23  | 1.0000 | 0.89095 | 0.59250 | 0.28665 | Biso | 1.000 | O  |
| P8   | 1.0000 | 0.59598 | 0.94619 | 0.52789 | Biso | 1.000 | P  |
| O24  | 1.0000 | 0.69459 | 0.93937 | 0.48691 | Biso | 1.000 | O  |
| O25  | 1.0000 | 0.57608 | 0.72533 | 0.85523 | Biso | 1.000 | O  |
| O26  | 1.0000 | 0.80354 | 0.84922 | 0.78250 | Biso | 1.000 | O  |
| P9   | 1.0000 | 0.92616 | 0.62094 | 0.18825 | Biso | 1.000 | P  |
| AI9  | 1.0000 | 0.48462 | 0.74598 | 0.06660 | Biso | 1.000 | AI |
| Si1  | 1.0000 | 0.93034 | 0.84179 | 0.40626 | Biso | 1.000 | Si |
| O27  | 1.0000 | 0.90764 | 0.72170 | 0.44702 | Biso | 1.000 | O  |
| O28  | 1.0000 | 0.69130 | 0.63842 | 0.08714 | Biso | 1.000 | O  |
| O29  | 1.0000 | 0.49315 | 0.87679 | 0.46898 | Biso | 1.000 | O  |
| AI10 | 1.0000 | 0.71359 | 0.74729 | 0.85837 | Biso | 1.000 | AI |
| O30  | 1.0000 | 0.82051 | 0.94752 | 0.63989 | Biso | 1.000 | O  |
| O31  | 1.0000 | 0.82909 | 0.53550 | 0.12928 | Biso | 1.000 | O  |
| P10  | 1.0000 | 0.82122 | 0.95952 | 0.74106 | Biso | 1.000 | P  |
| AI11 | 1.0000 | 0.91949 | 0.84383 | 0.19968 | Biso | 1.000 | AI |
| AI12 | 1.0000 | 0.82926 | 0.97110 | 0.52398 | Biso | 1.000 | AI |
| O32  | 1.0000 | 0.87251 | 0.82019 | 0.30763 | Biso | 1.000 | O  |
| O33  | 1.0000 | 0.84983 | 0.49389 | 0.45802 | Biso | 1.000 | O  |
| O34  | 1.0000 | 0.49029 | 0.84152 | 0.80205 | Biso | 1.000 | O  |
| P11  | 1.0000 | 0.72634 | 0.76130 | 0.06286 | Biso | 1.000 | P  |
| O35  | 1.0000 | 0.62324 | 0.77618 | 0.07253 | Biso | 1.000 | O  |
| O36  | 1.0000 | 0.72662 | 0.98205 | 0.77133 | Biso | 1.000 | O  |
| O37  | 1.0000 | 0.81184 | 0.43348 | 0.61854 | Biso | 1.000 | O  |
| O38  | 1.0000 | 0.48479 | 0.15723 | 0.46094 | Biso | 1.000 | O  |

|      |        |         |         |         |      |       |    |
|------|--------|---------|---------|---------|------|-------|----|
| O39  | 1.0000 | 0.62622 | 0.07037 | 0.53182 | Biso | 1.000 | O  |
| P12  | 1.0000 | 0.82135 | 0.39792 | 0.52277 | Biso | 1.000 | P  |
| O40  | 1.0000 | 0.70876 | 0.29902 | 0.49201 | Biso | 1.000 | O  |
| O41  | 1.0000 | 0.58676 | 0.41803 | 0.84435 | Biso | 1.000 | O  |
| O42  | 1.0000 | 0.50523 | 0.18575 | 0.80248 | Biso | 1.000 | O  |
| AI13 | 1.0000 | 0.71858 | 0.52784 | 0.06641 | Biso | 1.000 | AI |
| O43  | 1.0000 | 0.92361 | 0.11843 | 0.50982 | Biso | 1.000 | O  |
| AI14 | 1.0000 | 0.81411 | 0.40667 | 0.73304 | Biso | 1.000 | AI |
| O44  | 1.0000 | 0.91077 | 0.36080 | 0.51985 | Biso | 1.000 | O  |
| P13  | 1.0000 | 0.58720 | 0.17811 | 0.73722 | Biso | 1.000 | P  |
| O45  | 1.0000 | 0.57197 | 0.06075 | 0.74637 | Biso | 1.000 | O  |
| AI15 | 1.0000 | 0.59294 | 0.17768 | 0.53220 | Biso | 1.000 | AI |
| O46  | 1.0000 | 0.93408 | 0.05651 | 0.77412 | Biso | 1.000 | O  |
| O47  | 1.0000 | 0.79001 | 0.49967 | 0.79561 | Biso | 1.000 | O  |
| P14  | 1.0000 | 0.49291 | 0.29441 | 0.07624 | Biso | 1.000 | P  |
| O48  | 1.0000 | 0.59746 | 0.40587 | 0.10011 | Biso | 1.000 | O  |
| O49  | 1.0000 | 0.71007 | 0.26701 | 0.75889 | Biso | 1.000 | O  |
| O50  | 1.0000 | 0.94397 | 0.42175 | 0.76343 | Biso | 1.000 | O  |
| O51  | 1.0000 | 0.55775 | 0.19623 | 0.64140 | Biso | 1.000 | O  |
| O52  | 1.0000 | 0.45168 | 0.76414 | 0.95666 | Biso | 1.000 | O  |
| O53  | 1.0000 | 0.74770 | 0.52401 | 0.95278 | Biso | 1.000 | O  |
| O54  | 1.0000 | 0.77017 | 0.78751 | 0.96601 | Biso | 1.000 | O  |
| P15  | 1.0000 | 0.38816 | 0.86163 | 0.19200 | Biso | 1.000 | P  |
| O55  | 1.0000 | 0.40483 | 0.97486 | 0.15975 | Biso | 1.000 | O  |
| AI16 | 1.0000 | 0.37923 | 0.85732 | 0.40501 | Biso | 1.000 | AI |
| P16  | 1.0000 | 0.47341 | 0.74233 | 0.85964 | Biso | 1.000 | P  |
| O56  | 1.0000 | 0.37047 | 0.63668 | 0.82256 | Biso | 1.000 | O  |
| O57  | 1.0000 | 0.26447 | 0.77008 | 0.17694 | Biso | 1.000 | O  |
| O58  | 1.0000 | 0.03753 | 0.97543 | 0.18183 | Biso | 1.000 | O  |
| O59  | 1.0000 | 0.18309 | 0.54030 | 0.12310 | Biso | 1.000 | O  |
| O60  | 1.0000 | 0.13637 | 0.52250 | 0.46121 | Biso | 1.000 | O  |
| O61  | 1.0000 | 0.02926 | 0.60895 | 0.16783 | Biso | 1.000 | O  |
| O62  | 1.0000 | 0.41829 | 0.86751 | 0.29198 | Biso | 1.000 | O  |
| O63  | 1.0000 | 0.17033 | 0.58934 | 0.30406 | Biso | 1.000 | O  |
| O64  | 1.0000 | 0.33641 | 0.95450 | 0.43265 | Biso | 1.000 | O  |
| P17  | 1.0000 | 0.16140 | 0.62275 | 0.40097 | Biso | 1.000 | P  |
| O65  | 1.0000 | 0.27538 | 0.72054 | 0.43132 | Biso | 1.000 | O  |
| O66  | 1.0000 | 0.39041 | 0.60624 | 0.10042 | Biso | 1.000 | O  |
| AI17 | 1.0000 | 0.26313 | 0.50752 | 0.86128 | Biso | 1.000 | AI |
| O67  | 1.0000 | 0.06538 | 0.92878 | 0.39838 | Biso | 1.000 | O  |
| O68  | 1.0000 | 0.46904 | 0.83703 | 0.13906 | Biso | 1.000 | O  |
| O69  | 1.0000 | 0.07296 | 0.65876 | 0.40876 | Biso | 1.000 | O  |
| AI18 | 1.0000 | 0.16076 | 0.62826 | 0.19342 | Biso | 1.000 | AI |
| O70  | 1.0000 | 0.20914 | 0.26166 | 0.95530 | Biso | 1.000 | O  |

|     |        |         |         |         |      |       |   |
|-----|--------|---------|---------|---------|------|-------|---|
| O71 | 1.0000 | 0.50583 | 0.25180 | 0.98389 | Biso | 1.000 | O |
| O72 | 1.0000 | 0.24812 | 0.51082 | 0.97659 | Biso | 1.000 | O |
| H1  | 1.0000 | 0.83516 | 0.69340 | 0.56729 | Biso | 1.000 | H |
| C1  | 1.0000 | 0.45856 | 0.35927 | 0.61598 | Biso | 1.000 | C |
| H2  | 1.0000 | 0.42161 | 0.32253 | 0.67995 | Biso | 1.000 | H |
| H3  | 1.0000 | 0.42617 | 0.29117 | 0.56776 | Biso | 1.000 | H |
| H4  | 1.0000 | 0.54878 | 0.39435 | 0.62164 | Biso | 1.000 | H |
| C2  | 1.0000 | 0.61116 | 0.74911 | 0.29402 | Biso | 1.000 | C |
| C3  | 1.0000 | 0.61738 | 0.61073 | 0.40023 | Biso | 1.000 | C |
| H5  | 1.0000 | 0.70228 | 0.64088 | 0.37813 | Biso | 1.000 | H |
| C4  | 1.0000 | 0.57341 | 0.53276 | 0.46637 | Biso | 1.000 | C |
| H6  | 1.0000 | 0.62382 | 0.50254 | 0.49766 | Biso | 1.000 | H |
| C5  | 1.0000 | 0.46227 | 0.49580 | 0.49918 | Biso | 1.000 | C |
| C6  | 1.0000 | 0.42929 | 0.44929 | 0.59248 | Biso | 1.000 | C |
| C7  | 1.0000 | 0.39932 | 0.53817 | 0.45536 | Biso | 1.000 | C |
| H7  | 1.0000 | 0.32164 | 0.52294 | 0.48512 | Biso | 1.000 | H |
| C8  | 1.0000 | 0.44679 | 0.61808 | 0.38616 | Biso | 1.000 | C |
| H8  | 1.0000 | 0.39709 | 0.64954 | 0.35598 | Biso | 1.000 | H |
| C9  | 1.0000 | 0.55577 | 0.65772 | 0.36063 | Biso | 1.000 | C |
| H9  | 1.0000 | 0.63794 | 0.71928 | 0.23749 | Biso | 1.000 | H |
| H10 | 1.0000 | 0.68662 | 0.81893 | 0.32209 | Biso | 1.000 | H |
| H11 | 1.0000 | 0.55599 | 0.77899 | 0.27161 | Biso | 1.000 | H |
| H12 | 1.0000 | 0.33856 | 0.41369 | 0.59875 | Biso | 1.000 | H |
| C10 | 1.0000 | 0.36129 | 0.39149 | 0.41280 | Biso | 1.000 | C |
| H13 | 1.0000 | 0.40825 | 0.40917 | 0.35152 | Biso | 1.000 | H |
| H14 | 1.0000 | 0.36055 | 0.32462 | 0.45121 | Biso | 1.000 | H |
| H15 | 1.0000 | 0.27585 | 0.37352 | 0.40403 | Biso | 1.000 | H |
| C11 | 1.0000 | 0.48791 | 0.55058 | 0.65594 | Biso | 1.000 | C |
| O73 | 1.0000 | 0.78998 | 0.66369 | 0.62095 | Biso | 1.000 | O |
| H16 | 1.0000 | 0.46687 | 0.52199 | 0.72431 | Biso | 1.000 | H |
| H17 | 1.0000 | 0.57857 | 0.59157 | 0.64848 | Biso | 1.000 | H |
| H18 | 1.0000 | 0.46130 | 0.61179 | 0.64305 | Biso | 1.000 | H |
| H19 | 1.0000 | 0.82112 | 0.72615 | 0.66197 | Biso | 1.000 | H |

TS9-10/C3 in PX -based pathway

data\_image0

\_cell\_length\_a 13.8042  
 \_cell\_length\_b 13.8042  
 \_cell\_length\_c 15.044  
 \_cell\_angle\_alpha 90  
 \_cell\_angle\_beta 90  
 \_cell\_angle\_gamma 120

\_symmetry\_space\_group\_name\_H-M P 1

\_symmetry\_int\_tables\_number 1

loop\_

\_symmetry\_equiv\_pos\_as\_xyz  
 'x, y, z'

loop\_

\_atom\_site\_label  
 \_atom\_site\_occupancy  
 \_atom\_site\_fract\_x  
 \_atom\_site\_fract\_y  
 \_atom\_site\_fract\_z  
 \_atom\_site\_thermal\_displace\_type  
 \_atom\_site\_B\_iso\_or\_equiv  
 \_atom\_site\_type\_symbol

|     |        |         |         |         |      |       |    |
|-----|--------|---------|---------|---------|------|-------|----|
| P1  | 1.0000 | 0.05570 | 0.19055 | 0.52077 | Biso | 1.000 | P  |
| O1  | 1.0000 | 0.09365 | 0.31554 | 0.51214 | Biso | 1.000 | O  |
| O2  | 1.0000 | 0.28768 | 0.40443 | 0.84491 | Biso | 1.000 | O  |
| O3  | 1.0000 | 0.15490 | 0.50451 | 0.79583 | Biso | 1.000 | O  |
| Al1 | 1.0000 | 0.26506 | 0.28667 | 0.06221 | Biso | 1.000 | Al |
| O4  | 1.0000 | 0.18880 | 0.13294 | 0.28365 | Biso | 1.000 | O  |
| Al2 | 1.0000 | 0.06297 | 0.18704 | 0.72854 | Biso | 1.000 | Al |
| P2  | 1.0000 | 0.16162 | 0.08405 | 0.18845 | Biso | 1.000 | P  |
| Al3 | 1.0000 | 0.16201 | 0.07911 | 0.39414 | Biso | 1.000 | Al |
| O5  | 1.0000 | 0.08205 | 0.16510 | 0.61587 | Biso | 1.000 | O  |
| P3  | 1.0000 | 0.27057 | 0.28532 | 0.85339 | Biso | 1.000 | P  |
| O6  | 1.0000 | 0.38003 | 0.28937 | 0.82537 | Biso | 1.000 | O  |
| O7  | 1.0000 | 0.24990 | 0.05131 | 0.15863 | Biso | 1.000 | O  |
| O8  | 1.0000 | 0.48912 | 0.20957 | 0.14011 | Biso | 1.000 | O  |
| Al4 | 1.0000 | 0.06366 | 0.42307 | 0.52732 | Biso | 1.000 | Al |
| O9  | 1.0000 | 0.17841 | 0.20373 | 0.78972 | Biso | 1.000 | O  |
| P4  | 1.0000 | 0.26900 | 0.52042 | 0.06868 | Biso | 1.000 | P  |
| Al5 | 1.0000 | 0.38643 | 0.08411 | 0.18993 | Biso | 1.000 | Al |

|      |        |         |         |         |      |       |    |
|------|--------|---------|---------|---------|------|-------|----|
| O10  | 1.0000 | 0.24653 | 0.40096 | 0.08388 | Biso | 1.000 | O  |
| O11  | 1.0000 | 0.04320 | 0.30284 | 0.74212 | Biso | 1.000 | O  |
| O12  | 1.0000 | 0.40527 | 0.10567 | 0.30533 | Biso | 1.000 | O  |
| O13  | 1.0000 | 0.12164 | 0.16340 | 0.45333 | Biso | 1.000 | O  |
| O14  | 1.0000 | 0.08334 | 0.46534 | 0.63996 | Biso | 1.000 | O  |
| P5   | 1.0000 | 0.38767 | 0.08877 | 0.40660 | Biso | 1.000 | P  |
| O15  | 1.0000 | 0.29376 | 0.10933 | 0.43909 | Biso | 1.000 | O  |
| O16  | 1.0000 | 0.40567 | 0.32795 | 0.08871 | Biso | 1.000 | O  |
| P6   | 1.0000 | 0.05812 | 0.42143 | 0.73650 | Biso | 1.000 | P  |
| AI6  | 1.0000 | 0.50211 | 0.29644 | 0.86661 | Biso | 1.000 | AI |
| O17  | 1.0000 | 0.16643 | 0.17463 | 0.12527 | Biso | 1.000 | O  |
| AI7  | 1.0000 | 0.93852 | 0.62621 | 0.40472 | Biso | 1.000 | AI |
| P7   | 1.0000 | 0.73350 | 0.52816 | 0.85975 | Biso | 1.000 | P  |
| AI8  | 1.0000 | 0.60315 | 0.95700 | 0.73656 | Biso | 1.000 | AI |
| O18  | 1.0000 | 0.74416 | 0.64011 | 0.83003 | Biso | 1.000 | O  |
| O19  | 1.0000 | 0.96401 | 0.74978 | 0.16406 | Biso | 1.000 | O  |
| O20  | 1.0000 | 0.82294 | 0.84339 | 0.12951 | Biso | 1.000 | O  |
| O21  | 1.0000 | 0.58387 | 0.92399 | 0.62275 | Biso | 1.000 | O  |
| O22  | 1.0000 | 0.87752 | 0.89128 | 0.47761 | Biso | 1.000 | O  |
| O23  | 1.0000 | 0.92390 | 0.60925 | 0.28865 | Biso | 1.000 | O  |
| P8   | 1.0000 | 0.60205 | 0.95243 | 0.52249 | Biso | 1.000 | P  |
| O24  | 1.0000 | 0.69851 | 0.93807 | 0.48643 | Biso | 1.000 | O  |
| O25  | 1.0000 | 0.59439 | 0.72776 | 0.84566 | Biso | 1.000 | O  |
| O26  | 1.0000 | 0.82139 | 0.86045 | 0.78098 | Biso | 1.000 | O  |
| P9   | 1.0000 | 0.94150 | 0.63136 | 0.18779 | Biso | 1.000 | P  |
| AI9  | 1.0000 | 0.49248 | 0.74704 | 0.06289 | Biso | 1.000 | AI |
| Si1  | 1.0000 | 0.93618 | 0.84821 | 0.40667 | Biso | 1.000 | Si |
| O27  | 1.0000 | 0.91954 | 0.73068 | 0.45041 | Biso | 1.000 | O  |
| O28  | 1.0000 | 0.70273 | 0.64084 | 0.07648 | Biso | 1.000 | O  |
| O29  | 1.0000 | 0.49452 | 0.86948 | 0.47309 | Biso | 1.000 | O  |
| AI10 | 1.0000 | 0.73425 | 0.75863 | 0.85877 | Biso | 1.000 | AI |
| O30  | 1.0000 | 0.82873 | 0.95631 | 0.63927 | Biso | 1.000 | O  |
| O31  | 1.0000 | 0.83500 | 0.54114 | 0.13998 | Biso | 1.000 | O  |
| P10  | 1.0000 | 0.83335 | 0.96943 | 0.74066 | Biso | 1.000 | P  |
| AI11 | 1.0000 | 0.92702 | 0.84988 | 0.20196 | Biso | 1.000 | AI |
| AI12 | 1.0000 | 0.83526 | 0.97691 | 0.52232 | Biso | 1.000 | AI |
| O32  | 1.0000 | 0.87622 | 0.82296 | 0.30928 | Biso | 1.000 | O  |
| O33  | 1.0000 | 0.83601 | 0.49945 | 0.45487 | Biso | 1.000 | O  |
| O34  | 1.0000 | 0.50221 | 0.83834 | 0.79269 | Biso | 1.000 | O  |
| P11  | 1.0000 | 0.73406 | 0.76486 | 0.06350 | Biso | 1.000 | P  |
| O35  | 1.0000 | 0.62851 | 0.77367 | 0.07869 | Biso | 1.000 | O  |
| O36  | 1.0000 | 0.73766 | 0.98863 | 0.77355 | Biso | 1.000 | O  |
| O37  | 1.0000 | 0.84953 | 0.45829 | 0.61634 | Biso | 1.000 | O  |
| O38  | 1.0000 | 0.49706 | 0.17595 | 0.45305 | Biso | 1.000 | O  |



|      |        |         |         |         |      |       |    |
|------|--------|---------|---------|---------|------|-------|----|
| O39  | 1.0000 | 0.63047 | 0.07475 | 0.50649 | Biso | 1.000 | O  |
| P12  | 1.0000 | 0.83292 | 0.41177 | 0.51972 | Biso | 1.000 | P  |
| O40  | 1.0000 | 0.71711 | 0.30741 | 0.51089 | Biso | 1.000 | O  |
| O41  | 1.0000 | 0.60730 | 0.43863 | 0.85916 | Biso | 1.000 | O  |
| O42  | 1.0000 | 0.53012 | 0.21239 | 0.79702 | Biso | 1.000 | O  |
| AI13 | 1.0000 | 0.73452 | 0.53238 | 0.06447 | Biso | 1.000 | AI |
| O43  | 1.0000 | 0.92758 | 0.12215 | 0.50375 | Biso | 1.000 | O  |
| AI14 | 1.0000 | 0.83022 | 0.41186 | 0.72826 | Biso | 1.000 | AI |
| O44  | 1.0000 | 0.92427 | 0.38168 | 0.49676 | Biso | 1.000 | O  |
| P13  | 1.0000 | 0.59578 | 0.18087 | 0.73235 | Biso | 1.000 | P  |
| O45  | 1.0000 | 0.58241 | 0.06867 | 0.76349 | Biso | 1.000 | O  |
| AI15 | 1.0000 | 0.59628 | 0.17938 | 0.52729 | Biso | 1.000 | AI |
| O46  | 1.0000 | 0.94568 | 0.06806 | 0.77218 | Biso | 1.000 | O  |
| O47  | 1.0000 | 0.79823 | 0.49812 | 0.79236 | Biso | 1.000 | O  |
| P14  | 1.0000 | 0.49891 | 0.29815 | 0.07280 | Biso | 1.000 | P  |
| O48  | 1.0000 | 0.61301 | 0.40431 | 0.08566 | Biso | 1.000 | O  |
| O49  | 1.0000 | 0.72180 | 0.27054 | 0.73218 | Biso | 1.000 | O  |
| O50  | 1.0000 | 0.95025 | 0.41623 | 0.77079 | Biso | 1.000 | O  |
| O51  | 1.0000 | 0.54641 | 0.16931 | 0.63763 | Biso | 1.000 | O  |
| O52  | 1.0000 | 0.47700 | 0.77420 | 0.95047 | Biso | 1.000 | O  |
| O53  | 1.0000 | 0.78262 | 0.53698 | 0.95382 | Biso | 1.000 | O  |
| O54  | 1.0000 | 0.77969 | 0.80333 | 0.96774 | Biso | 1.000 | O  |
| P15  | 1.0000 | 0.39809 | 0.86512 | 0.19200 | Biso | 1.000 | P  |
| O55  | 1.0000 | 0.40808 | 0.97425 | 0.15535 | Biso | 1.000 | O  |
| AI16 | 1.0000 | 0.39288 | 0.86483 | 0.40008 | Biso | 1.000 | AI |
| P16  | 1.0000 | 0.49156 | 0.74442 | 0.85410 | Biso | 1.000 | P  |
| O56  | 1.0000 | 0.38845 | 0.63526 | 0.82293 | Biso | 1.000 | O  |
| O57  | 1.0000 | 0.27375 | 0.77113 | 0.18876 | Biso | 1.000 | O  |
| O58  | 1.0000 | 0.04408 | 0.98227 | 0.18201 | Biso | 1.000 | O  |
| O59  | 1.0000 | 0.19473 | 0.54110 | 0.13283 | Biso | 1.000 | O  |
| O60  | 1.0000 | 0.16463 | 0.53393 | 0.46380 | Biso | 1.000 | O  |
| O61  | 1.0000 | 0.04114 | 0.61944 | 0.15484 | Biso | 1.000 | O  |
| O62  | 1.0000 | 0.44177 | 0.88306 | 0.28915 | Biso | 1.000 | O  |
| O63  | 1.0000 | 0.14590 | 0.58333 | 0.30673 | Biso | 1.000 | O  |
| O64  | 1.0000 | 0.35948 | 0.96810 | 0.43145 | Biso | 1.000 | O  |
| P17  | 1.0000 | 0.16506 | 0.62498 | 0.40412 | Biso | 1.000 | P  |
| O65  | 1.0000 | 0.27935 | 0.73122 | 0.41430 | Biso | 1.000 | O  |
| O66  | 1.0000 | 0.39492 | 0.60460 | 0.08576 | Biso | 1.000 | O  |
| AI17 | 1.0000 | 0.26586 | 0.51816 | 0.86082 | Biso | 1.000 | AI |
| O67  | 1.0000 | 0.07008 | 0.93734 | 0.39694 | Biso | 1.000 | O  |
| O68  | 1.0000 | 0.47170 | 0.83534 | 0.13435 | Biso | 1.000 | O  |
| O69  | 1.0000 | 0.07270 | 0.64959 | 0.43503 | Biso | 1.000 | O  |
| AI18 | 1.0000 | 0.16512 | 0.62993 | 0.19557 | Biso | 1.000 | AI |
| O70  | 1.0000 | 0.23839 | 0.24284 | 0.94985 | Biso | 1.000 | O  |

|     |        |         |         |         |      |       |   |
|-----|--------|---------|---------|---------|------|-------|---|
| O71 | 1.0000 | 0.48854 | 0.25023 | 0.97745 | Biso | 1.000 | O |
| O72 | 1.0000 | 0.23750 | 0.53363 | 0.97223 | Biso | 1.000 | O |
| H1  | 1.0000 | 0.90844 | 0.73446 | 0.56386 | Biso | 1.000 | H |
| C1  | 1.0000 | 0.59727 | 0.46019 | 0.62546 | Biso | 1.000 | C |
| H2  | 1.0000 | 0.53865 | 0.38081 | 0.59468 | Biso | 1.000 | H |
| H3  | 1.0000 | 0.67477 | 0.45841 | 0.63669 | Biso | 1.000 | H |
| H4  | 1.0000 | 0.56650 | 0.47003 | 0.68937 | Biso | 1.000 | H |
| C2  | 1.0000 | 0.55932 | 0.60156 | 0.26761 | Biso | 1.000 | C |
| C3  | 1.0000 | 0.45531 | 0.44221 | 0.37621 | Biso | 1.000 | C |
| H5  | 1.0000 | 0.46552 | 0.38669 | 0.33086 | Biso | 1.000 | H |
| C4  | 1.0000 | 0.40598 | 0.40243 | 0.45904 | Biso | 1.000 | C |
| H6  | 1.0000 | 0.37806 | 0.31648 | 0.47705 | Biso | 1.000 | H |
| C5  | 1.0000 | 0.39332 | 0.47222 | 0.52011 | Biso | 1.000 | C |
| C6  | 1.0000 | 0.62830 | 0.55558 | 0.56561 | Biso | 1.000 | C |
| C7  | 1.0000 | 0.42743 | 0.58207 | 0.49370 | Biso | 1.000 | C |
| H7  | 1.0000 | 0.41638 | 0.63725 | 0.53881 | Biso | 1.000 | H |
| C8  | 1.0000 | 0.47772 | 0.62207 | 0.41151 | Biso | 1.000 | C |
| H8  | 1.0000 | 0.50724 | 0.70845 | 0.39387 | Biso | 1.000 | H |
| C9  | 1.0000 | 0.49468 | 0.55376 | 0.35205 | Biso | 1.000 | C |
| H9  | 1.0000 | 0.52653 | 0.54166 | 0.21299 | Biso | 1.000 | H |
| H10 | 1.0000 | 0.64722 | 0.62577 | 0.27739 | Biso | 1.000 | H |
| H11 | 1.0000 | 0.55828 | 0.67708 | 0.24808 | Biso | 1.000 | H |
| H12 | 1.0000 | 0.63923 | 0.54350 | 0.49571 | Biso | 1.000 | H |
| C10 | 1.0000 | 0.34440 | 0.43108 | 0.61117 | Biso | 1.000 | C |
| H13 | 1.0000 | 0.32800 | 0.34623 | 0.62313 | Biso | 1.000 | H |
| H14 | 1.0000 | 0.40031 | 0.48528 | 0.66345 | Biso | 1.000 | H |
| H15 | 1.0000 | 0.26608 | 0.43121 | 0.61933 | Biso | 1.000 | H |
| C11 | 1.0000 | 0.66538 | 0.66372 | 0.59534 | Biso | 1.000 | C |
| O73 | 1.0000 | 0.88171 | 0.72194 | 0.62699 | Biso | 1.000 | O |
| H16 | 1.0000 | 0.76414 | 0.68557 | 0.60967 | Biso | 1.000 | H |
| H17 | 1.0000 | 0.63861 | 0.67394 | 0.66097 | Biso | 1.000 | H |
| H18 | 1.0000 | 0.67646 | 0.72564 | 0.54600 | Biso | 1.000 | H |
| H19 | 1.0000 | 0.91348 | 0.79547 | 0.65430 | Biso | 1.000 | H |
